# Supplementary material for: Low carbon fuels and commodity chemicals from waste gases – systematic approach to understand energy metabolism in a model acetogen
Source: Royal Society of Chemistry journal article supplement (doi:10.1039/c5gc02708j), 2016-01-01
Supplement: c5gc02708j2.xlsx [file c5gc02708j2.xlsx]

## Sheet: TABLE S3 RNA-seq
gene	locus	sample_1	sample_2	status	value_1	value_2	log2(fold_change)	test_stat	p_value	q_value	significant
CAETHG_0001	CP006763:78-285	'ABRINI_FRU'	'ABRINI_RMG'	OK	15.9614	7.10965	-1.16674	-2.45936	0.24065	0.308623	no
CAETHG_0002	CP006763:523-781	'ABRINI_FRU'	'ABRINI_RMG'	OK	5.38414	1.71564	-1.64997	-1.81399	0.31835	0.39226	no
CAETHG_0003	CP006763:788-1250	'ABRINI_FRU'	'ABRINI_RMG'	OK	12.284	5.19697	-1.24104	-2.04869	0.02225	0.0394108	yes
CAETHG_0004	CP006763:1365-2340	'ABRINI_FRU'	'ABRINI_RMG'	OK	87.6385	133.494	0.607134	1.58772	0.01765	0.0321671	yes
CAETHG_0005	CP006763:2383-3280	'ABRINI_FRU'	'ABRINI_RMG'	OK	38.2076	33.3202	-0.197463	-0.440002	0.4663	0.542778	no
CAETHG_0006	CP006763:3318-3609	'ABRINI_FRU'	'ABRINI_RMG'	OK	7.16514	6.99783	-0.0340874	-0.0525588	0.964	0.97171	no
CAETHG_0007	CP006763:3632-6290	'ABRINI_FRU'	'ABRINI_RMG'	OK	42.9925	44.1463	0.038206	0.100689	0.8831	0.909589	no
CAETHG_0008	CP006763:6495-7722	'ABRINI_FRU'	'ABRINI_RMG'	OK	8.64966	5.14232	-0.750223	-1.24009	0.029	0.0499401	yes
CAETHG_0009	CP006763:7751-9257	'ABRINI_FRU'	'ABRINI_RMG'	OK	49.993	79.2414	0.664528	1.49581	0.0104	0.0200332	yes
CAETHG_0010	CP006763:9318-9993	'ABRINI_FRU'	'ABRINI_RMG'	OK	6.09378	1.56098	-1.96489	-2.73635	0.03375	0.0570408	no
CAETHG_0011	CP006763:10178-11381	'ABRINI_FRU'	'ABRINI_RMG'	OK	44.9179	43.1005	-0.0595868	-0.161336	0.82405	0.860279	no
CAETHG_0012	CP006763:11630-12203	'ABRINI_FRU'	'ABRINI_RMG'	OK	11.8555	4.80178	-1.30392	-2.22685	0.01225	0.0231993	yes
CAETHG_0013	CP006763:12204-12876	'ABRINI_FRU'	'ABRINI_RMG'	OK	7.52349	3.58912	-1.06777	-1.63455	0.0384	0.0637443	no
CAETHG_0014	CP006763:12992-13940	'ABRINI_FRU'	'ABRINI_RMG'	OK	8.14066	6.3436	-0.359844	-0.677151	0.33735	0.412041	no
CAETHG_0015	CP006763:13991-14195	'ABRINI_FRU'	'ABRINI_RMG'	OK	15.3491	7.87168	-0.963407	-2.54283	0.4069	0.484001	no
CAETHG_0016	CP006763:14196-14589	'ABRINI_FRU'	'ABRINI_RMG'	OK	4.78889	11.6828	1.28662	2.41603	0.0692	0.106445	no
CAETHG_0017	CP006763:15325-15868	'ABRINI_FRU'	'ABRINI_RMG'	OK	28.5406	391.653	3.77849	10.3047	5e-05	0.00015337	yes
CAETHG_0018	CP006763:15882-16341	'ABRINI_FRU'	'ABRINI_RMG'	OK	11.5606	186.661	4.01314	10.643	5e-05	0.00015337	yes
CAETHG_0019	CP006763:16407-17190	'ABRINI_FRU'	'ABRINI_RMG'	OK	26.8205	389.675	3.86086	9.14863	5e-05	0.00015337	yes
CAETHG_0020	CP006763:17207-18098	'ABRINI_FRU'	'ABRINI_RMG'	OK	50.4309	535.954	3.40973	7.75791	5e-05	0.00015337	yes
CAETHG_0021	CP006763:18110-19049	'ABRINI_FRU'	'ABRINI_RMG'	OK	62.1479	453.675	2.86788	9.05203	5e-05	0.00015337	yes
CAETHG_0022	CP006763:19335-21475	'ABRINI_FRU'	'ABRINI_RMG'	OK	19.163	20.2401	0.0788936	0.138859	0.858	0.887802	no
CAETHG_0023	CP006763:19335-21475	'ABRINI_FRU'	'ABRINI_RMG'	OK	14.799	7.72353	-0.938164	-1.44729	0.0194	0.0349566	yes
CAETHG_0024	CP006763:21558-22923	'ABRINI_FRU'	'ABRINI_RMG'	OK	21.9097	28.2529	0.366828	0.804394	0.17505	0.236111	no
CAETHG_0025	CP006763:23190-23880	'ABRINI_FRU'	'ABRINI_RMG'	OK	130.808	401.542	1.6181	5.27232	5e-05	0.00015337	yes
CAETHG_0026	CP006763:23940-24462	'ABRINI_FRU'	'ABRINI_RMG'	OK	440.229	573.267	0.380955	1.52633	0.14405	0.200304	no
CAETHG_0027	CP006763:24942-25140	'ABRINI_FRU'	'ABRINI_RMG'	OK	73.0035	8.28534	-3.13933	-8.40318	0.01365	0.025547	yes
CAETHG_0028	CP006763:25219-26041	'ABRINI_FRU'	'ABRINI_RMG'	OK	36.7614	41.4419	0.172898	0.451779	0.5334	0.605759	no
CAETHG_0029	CP006763:26262-26851	'ABRINI_FRU'	'ABRINI_RMG'	OK	37.1802	8.70991	-2.0938	-3.98973	0.07895	0.119142	no
CAETHG_0030	CP006763:26262-26851	'ABRINI_FRU'	'ABRINI_RMG'	OK	13.7874	2.33031	-2.56476	-1.17829	0.063	0.0982923	no
CAETHG_0031	CP006763:26870-28007	'ABRINI_FRU'	'ABRINI_RMG'	OK	15.2532	3.755	-2.02223	-3.05835	5e-05	0.00015337	yes
CAETHG_0032	CP006763:28021-28234	'ABRINI_FRU'	'ABRINI_RMG'	OK	8.8448	7.91031	-0.161096	-0.307617	0.86865	0.897123	no
CAETHG_0033	CP006763:28256-28559	'ABRINI_FRU'	'ABRINI_RMG'	OK	25.7876	12.971	-0.991384	-2.45623	0.0605	0.0948694	no
CAETHG_0034	CP006763:28805-29291	'ABRINI_FRU'	'ABRINI_RMG'	OK	115.914	453.777	1.96892	6.06808	5e-05	0.00015337	yes
CAETHG_0035	CP006763:29493-29691	'ABRINI_FRU'	'ABRINI_RMG'	OK	2186.97	146.105	-3.90386	-30.3335	5e-05	0.00015337	yes
CAETHG_0036	CP006763:29826-30933	'ABRINI_FRU'	'ABRINI_RMG'	OK	259.876	436.311	0.747534	1.72395	0.00415	0.00881904	yes
CAETHG_0037	CP006763:30945-32469	'ABRINI_FRU'	'ABRINI_RMG'	OK	318.498	127.828	-1.31708	-3.52967	5e-05	0.00015337	yes
CAETHG_0038	CP006763:32572-33502	'ABRINI_FRU'	'ABRINI_RMG'	OK	48.051	57.6527	0.262823	0.687144	0.32655	0.400899	no
CAETHG_0039	CP006763:33702-34032	'ABRINI_FRU'	'ABRINI_RMG'	OK	377.718	485.744	0.362888	1.5031	0.16585	0.225532	no
CAETHG_0040	CP006763:34081-36197	'ABRINI_FRU'	'ABRINI_RMG'	OK	30.433	14.6276	-1.05694	-2.71555	0.00195	0.00444889	yes
CAETHG_0041	CP006763:34081-36197	'ABRINI_FRU'	'ABRINI_RMG'	OK	15.4565	8.89385	-0.797333	-0.711082	0.231	0.298716	no
CAETHG_0042	CP006763:36358-38243	'ABRINI_FRU'	'ABRINI_RMG'	NOTEST	1.52703	0.553862	-1.46313	0	1	1	no
CAETHG_0043	CP006763:36358-38243	'ABRINI_FRU'	'ABRINI_RMG'	NOTEST	1.29749	1.01241	-0.357934	0	1	1	no
CAETHG_0044	CP006763:38380-40445	'ABRINI_FRU'	'ABRINI_RMG'	OK	2.80996	0.462221	-2.60389	-1.41205	0.0721	0.11027	no
CAETHG_0045	CP006763:38380-40445	'ABRINI_FRU'	'ABRINI_RMG'	OK	4.51727	1.99293	-1.18056	-1.26001	0.06455	0.10041	no
CAETHG_0046	CP006763:40447-41620	'ABRINI_FRU'	'ABRINI_RMG'	OK	2.08447	0.557609	-1.90235	-1.61326	0.04015	0.066199	no
CAETHG_0047	CP006763:41758-42283	'ABRINI_FRU'	'ABRINI_RMG'	OK	156.086	18.1346	-3.10552	-7.8999	5e-05	0.00015337	yes
CAETHG_0048	CP006763:42354-43104	'ABRINI_FRU'	'ABRINI_RMG'	OK	55.9784	37.5199	-0.577214	-1.56051	0.0442	0.0722122	no
CAETHG_0049	CP006763:43106-43898	'ABRINI_FRU'	'ABRINI_RMG'	OK	14.5001	1.62518	-3.15739	-4.03365	0.00015	0.000427948	yes
CAETHG_0050	CP006763:44246-45218	'ABRINI_FRU'	'ABRINI_RMG'	OK	89.6637	130.414	0.540501	1.33962	0.0363	0.0607507	no
CAETHG_0051	CP006763:45606-46844	'ABRINI_FRU'	'ABRINI_RMG'	OK	66.9721	9.57956	-2.80553	-6.12256	5e-05	0.00015337	yes
CAETHG_0053	CP006763:46927-47275	'ABRINI_FRU'	'ABRINI_RMG'	OK	131.418	38.5527	-1.76926	-7.22944	5e-05	0.00015337	yes
CAETHG_0054	CP006763:47283-48273	'ABRINI_FRU'	'ABRINI_RMG'	OK	114.089	72.6308	-0.651503	-1.72611	0.01175	0.0223632	yes
CAETHG_0055	CP006763:48324-48792	'ABRINI_FRU'	'ABRINI_RMG'	OK	216.976	360.905	0.734086	3.02871	0.0054	0.0112075	yes
CAETHG_0056	CP006763:48845-50000	'ABRINI_FRU'	'ABRINI_RMG'	OK	75.127	25.7987	-1.54203	-3.73624	5e-05	0.00015337	yes
CAETHG_0057	CP006763:50413-52288	'ABRINI_FRU'	'ABRINI_RMG'	OK	45.0876	101.459	1.17009	2.95739	5e-05	0.00015337	yes
CAETHG_0058	CP006763:52801-54046	'ABRINI_FRU'	'ABRINI_RMG'	OK	8.51441	1.59401	-2.41724	-3.55688	0.0001	0.00029355	yes
CAETHG_0059	CP006763:54259-55135	'ABRINI_FRU'	'ABRINI_RMG'	OK	7.5861	2.63003	-1.52828	-2.13823	0.0027	0.00598267	yes
CAETHG_0060	CP006763:55299-56121	'ABRINI_FRU'	'ABRINI_RMG'	OK	108.36	65.2248	-0.732345	-1.72268	0.00555	0.0114856	yes
CAETHG_0061	CP006763:56326-56980	'ABRINI_FRU'	'ABRINI_RMG'	OK	7.46943	6.20412	-0.267772	-0.456313	0.5681	0.637591	no
CAETHG_0062	CP006763:56980-58414	'ABRINI_FRU'	'ABRINI_RMG'	OK	66.0368	161.593	1.29102	3.84738	5e-05	0.00015337	yes
CAETHG_0063	CP006763:58453-59011	'ABRINI_FRU'	'ABRINI_RMG'	OK	13.8872	5.41608	-1.35843	-2.35217	0.0051	0.0106446	yes
CAETHG_0064	CP006763:59032-59884	'ABRINI_FRU'	'ABRINI_RMG'	OK	29.7919	13.52	-1.13983	-2.75869	0.0007	0.00176059	yes
CAETHG_0065	CP006763:59932-60400	'ABRINI_FRU'	'ABRINI_RMG'	OK	55.8383	20.9986	-1.41096	-4.1227	0.0002	0.000558102	yes
CAETHG_0066	CP006763:60752-62081	'ABRINI_FRU'	'ABRINI_RMG'	OK	11.3379	20.2733	0.838423	1.97856	0.0063	0.0128384	yes
CAETHG_0067	CP006763:62462-63728	'ABRINI_FRU'	'ABRINI_RMG'	OK	10.6601	25.5188	1.25934	2.38713	5e-05	0.00015337	yes
CAETHG_0068	CP006763:64089-64716	'ABRINI_FRU'	'ABRINI_RMG'	OK	38.6079	17.1648	-1.16944	-3.75078	0.0015	0.00351954	yes
CAETHG_0069	CP006763:64951-65521	'ABRINI_FRU'	'ABRINI_RMG'	OK	5.28868	2.36845	-1.15896	-1.44199	0.08945	0.132889	no
CAETHG_0070	CP006763:65614-66400	'ABRINI_FRU'	'ABRINI_RMG'	OK	13.8317	19.4707	0.493319	1.10696	0.12965	0.18301	no
CAETHG_0071	CP006763:66552-67119	'ABRINI_FRU'	'ABRINI_RMG'	NOTEST	1.16612	0	#NAME?	0	1	1	no
CAETHG_0072	CP006763:67599-68046	'ABRINI_FRU'	'ABRINI_RMG'	OK	21.3008	11.5398	-0.884293	-2.25822	0.04895	0.0788494	no
CAETHG_0073	CP006763:68176-69211	'ABRINI_FRU'	'ABRINI_RMG'	OK	13.5241	9.86233	-0.455528	-0.915341	0.15305	0.210825	no
CAETHG_0074	CP006763:69498-70356	'ABRINI_FRU'	'ABRINI_RMG'	NOTEST	1.69794	1.13794	-0.577361	0	1	1	no
CAETHG_0075	CP006763:70580-71468	'ABRINI_FRU'	'ABRINI_RMG'	OK	105.132	107.661	0.0343033	0.101159	0.8951	0.917992	no
CAETHG_0076	CP006763:71821-72481	'ABRINI_FRU'	'ABRINI_RMG'	OK	32.8767	9.79307	-1.74723	-4.1485	5e-05	0.00015337	yes
CAETHG_0077	CP006763:72706-74713	'ABRINI_FRU'	'ABRINI_RMG'	OK	57.8631	38.5084	-0.58747	-1.34253	0.02995	0.0513909	no
CAETHG_0078	CP006763:74723-75608	'ABRINI_FRU'	'ABRINI_RMG'	OK	37.1031	140.001	1.91582	4.49129	5e-05	0.00015337	yes
CAETHG_0079	CP006763:75866-76733	'ABRINI_FRU'	'ABRINI_RMG'	OK	79.5848	372.326	2.226	5.3728	5e-05	0.00015337	yes
CAETHG_0080	CP006763:77169-77703	'ABRINI_FRU'	'ABRINI_RMG'	OK	130.142	224.721	0.788049	2.43471	0.00305	0.00668714	yes
CAETHG_0081	CP006763:77904-78462	'ABRINI_FRU'	'ABRINI_RMG'	OK	29.72	59.9883	1.01325	2.60844	0.0009	0.00221219	yes
CAETHG_0082	CP006763:78552-78738	'ABRINI_FRU'	'ABRINI_RMG'	OK	19.8249	17.5623	-0.174832	-0.550494	0.8408	0.87371	no
CAETHG_0083	CP006763:78888-79461	'ABRINI_FRU'	'ABRINI_RMG'	OK	381.044	1146.48	1.58918	3.81375	5e-05	0.00015337	yes
CAETHG_0084	CP006763:79474-81163	'ABRINI_FRU'	'ABRINI_RMG'	OK	389.046	1212.45	1.63991	2.97521	5e-05	0.00015337	yes
CAETHG_0085	CP006763:81175-81580	'ABRINI_FRU'	'ABRINI_RMG'	OK	204.278	727.998	1.8334	6.32922	5e-05	0.00015337	yes
CAETHG_0086	CP006763:82183-82408	'ABRINI_FRU'	'ABRINI_RMG'	OK	619.279	3734.72	2.59234	20.6424	5e-05	0.00015337	yes
CAETHG_0087	CP006763:82410-83094	'ABRINI_FRU'	'ABRINI_RMG'	OK	251.274	1721.42	2.77627	6.58487	5e-05	0.00015337	yes
CAETHG_0088	CP006763:83412-84195	'ABRINI_FRU'	'ABRINI_RMG'	OK	10.6808	26.357	1.30317	2.75784	5e-05	0.00015337	yes
CAETHG_0089	CP006763:84252-85290	'ABRINI_FRU'	'ABRINI_RMG'	OK	6.66974	15.3066	1.19845	2.25141	0.0008	0.00198813	yes
CAETHG_0090	CP006763:85416-86505	'ABRINI_FRU'	'ABRINI_RMG'	OK	23.1663	102.981	2.15227	4.68881	5e-05	0.00015337	yes
CAETHG_0091	CP006763:86627-86891	'ABRINI_FRU'	'ABRINI_RMG'	OK	0.820488	17.5741	4.42082	3.27582	0.2077	0.273523	no
CAETHG_0092	CP006763:87173-88997	'ABRINI_FRU'	'ABRINI_RMG'	OK	2231.76	10060.1	2.17239	2.45247	5e-05	0.00015337	yes
CAETHG_0093	CP006763:89179-90520	'ABRINI_FRU'	'ABRINI_RMG'	OK	421.159	1811.48	2.10473	4.12615	5e-05	0.00015337	yes
CAETHG_0094	CP006763:90684-92583	'ABRINI_FRU'	'ABRINI_RMG'	OK	530.337	1368.89	1.36803	2.3717	0.00015	0.000427948	yes
CAETHG_0095	CP006763:93085-93931	'ABRINI_FRU'	'ABRINI_RMG'	OK	696.555	1659.48	1.25243	2.6307	0.0001	0.00029355	yes
CAETHG_0096	CP006763:93955-95309	'ABRINI_FRU'	'ABRINI_RMG'	OK	573.213	1887.35	1.71922	2.85131	5e-05	0.00015337	yes
CAETHG_0097	CP006763:93955-95309	'ABRINI_FRU'	'ABRINI_RMG'	OK	547.682	1196.26	1.12713	1.36909	0.0263	0.0457092	yes
CAETHG_0098	CP006763:95362-96595	'ABRINI_FRU'	'ABRINI_RMG'	OK	468.053	1030.76	1.13897	2.12903	0.0001	0.00029355	yes
CAETHG_0099	CP006763:96599-98507	'ABRINI_FRU'	'ABRINI_RMG'	OK	369.798	1305.13	1.81938	2.98031	5e-05	0.00015337	yes
CAETHG_0100	CP006763:98632-100086	'ABRINI_FRU'	'ABRINI_RMG'	OK	521.353	845.092	0.696848	1.31602	0.14805	0.205021	no
CAETHG_0101	CP006763:98632-100086	'ABRINI_FRU'	'ABRINI_RMG'	OK	318.014	520.225	0.710044	1.19997	0.0392	0.0648658	no
CAETHG_0102	CP006763:100224-102048	'ABRINI_FRU'	'ABRINI_RMG'	OK	260.052	1094.55	2.07347	3.3322	5e-05	0.00015337	yes
CAETHG_0103	CP006763:102140-102365	'ABRINI_FRU'	'ABRINI_RMG'	OK	794.381	3550.02	2.15992	16.8398	5e-05	0.00015337	yes
CAETHG_0104	CP006763:102367-103054	'ABRINI_FRU'	'ABRINI_RMG'	OK	400.591	1888.61	2.23712	5.11504	5e-05	0.00015337	yes
CAETHG_0105	CP006763:103211-105170	'ABRINI_FRU'	'ABRINI_RMG'	OK	301.074	1372.77	2.1889	3.75126	5e-05	0.00015337	yes
CAETHG_0106	CP006763:105539-105986	'ABRINI_FRU'	'ABRINI_RMG'	OK	2.67784	1.37032	-0.966554	-0.868157	0.3919	0.468491	no
CAETHG_0107	CP006763:106059-106923	'ABRINI_FRU'	'ABRINI_RMG'	OK	5.66076	2.98151	-0.924954	-1.3409	0.05795	0.0913704	no
CAETHG_0108	CP006763:107050-107947	'ABRINI_FRU'	'ABRINI_RMG'	OK	21.1333	36.7615	0.798679	1.65911	0.00435	0.00919973	yes
CAETHG_0109	CP006763:108106-110752	'ABRINI_FRU'	'ABRINI_RMG'	OK	88.4478	76.7707	-0.204269	-0.425942	0.424	0.501222	no
CAETHG_0110	CP006763:110946-112293	'ABRINI_FRU'	'ABRINI_RMG'	OK	78.2261	58.1883	-0.42692	-0.903854	0.098	0.144042	no
CAETHG_0111	CP006763:112323-113628	'ABRINI_FRU'	'ABRINI_RMG'	OK	48.5154	8.703	-2.47886	-6.90554	5e-05	0.00015337	yes
CAETHG_0112	CP006763:113949-117493	'ABRINI_FRU'	'ABRINI_RMG'	OK	28.3614	8.87969	-1.67535	-1.69579	0.0089	0.0174396	yes
CAETHG_0113	CP006763:113949-117493	'ABRINI_FRU'	'ABRINI_RMG'	OK	34.4546	23.329	-0.562574	-1.08207	0.0624	0.0975021	no
CAETHG_0114	CP006763:117504-118650	'ABRINI_FRU'	'ABRINI_RMG'	OK	66.6507	57.6625	-0.208988	-0.508807	0.4201	0.497432	no
CAETHG_0115	CP006763:119081-119885	'ABRINI_FRU'	'ABRINI_RMG'	OK	289.605	26.0658	-3.47385	-7.87573	5e-05	0.00015337	yes
CAETHG_0116	CP006763:119889-120888	'ABRINI_FRU'	'ABRINI_RMG'	OK	378.194	37.2633	-3.3433	-7.21665	5e-05	0.00015337	yes
CAETHG_0117	CP006763:120911-122318	'ABRINI_FRU'	'ABRINI_RMG'	OK	459.845	48.8922	-3.23347	-6.50605	5e-05	0.00015337	yes
CAETHG_0118	CP006763:122439-123348	'ABRINI_FRU'	'ABRINI_RMG'	OK	320.664	67.3113	-2.25214	-5.48253	5e-05	0.00015337	yes
CAETHG_0119	CP006763:123515-125431	'ABRINI_FRU'	'ABRINI_RMG'	OK	60.4996	160.873	1.41093	2.40973	0.0003	0.000809958	yes
CAETHG_0120	CP006763:123515-125431	'ABRINI_FRU'	'ABRINI_RMG'	OK	182.763	493.512	1.43311	2.32875	0.0001	0.00029355	yes
CAETHG_0121	CP006763:125697-126636	'ABRINI_FRU'	'ABRINI_RMG'	OK	133.067	11.5737	-3.52323	-9.5642	5e-05	0.00015337	yes
CAETHG_0122	CP006763:128068-129082	'ABRINI_FRU'	'ABRINI_RMG'	OK	1421.28	40.2583	-5.14176	-10.7267	5e-05	0.00015337	yes
CAETHG_0123	CP006763:129637-131296	'ABRINI_FRU'	'ABRINI_RMG'	OK	589.795	87.7491	-2.74876	-4.99801	5e-05	0.00015337	yes
CAETHG_0124	CP006763:132079-133690	'ABRINI_FRU'	'ABRINI_RMG'	OK	157.669	112.256	-0.490105	-1.02192	0.0564	0.0891963	no
CAETHG_0125	CP006763:133720-134197	'ABRINI_FRU'	'ABRINI_RMG'	OK	164.741	137.472	-0.261068	-0.968033	0.3237	0.397869	no
CAETHG_0126	CP006763:134446-134713	'ABRINI_FRU'	'ABRINI_RMG'	OK	258.667	91.4181	-1.50055	-7.89168	5e-05	0.00015337	yes
CAETHG_0127	CP006763:134793-136755	'ABRINI_FRU'	'ABRINI_RMG'	OK	39.1649	21.522	-0.863748	-1.83622	0.00085	0.00209829	yes
CAETHG_0128	CP006763:137031-138183	'ABRINI_FRU'	'ABRINI_RMG'	OK	7.94279	5.4881	-0.533339	-1.2578	0.1752	0.236257	no
CAETHG_0129	CP006763:138950-140309	'ABRINI_FRU'	'ABRINI_RMG'	OK	7.50562	4.041	-0.893258	-1.42333	0.0122	0.0231199	yes
CAETHG_0130	CP006763:140375-141359	'ABRINI_FRU'	'ABRINI_RMG'	OK	17.0635	11.5084	-0.568217	-0.981672	0.0623	0.0973724	no
CAETHG_0131	CP006763:141387-142371	'ABRINI_FRU'	'ABRINI_RMG'	OK	22.6015	15.6353	-0.531608	-1.03843	0.071	0.108776	no
CAETHG_0132	CP006763:142405-142624	'ABRINI_FRU'	'ABRINI_RMG'	OK	34.7988	17.5657	-0.986279	-2.68235	0.0803	0.12075	no
CAETHG_0133	CP006763:142639-143407	'ABRINI_FRU'	'ABRINI_RMG'	OK	38.6939	35.1044	-0.140454	-0.313676	0.6128	0.67794	no
CAETHG_0134	CP006763:143421-143913	'ABRINI_FRU'	'ABRINI_RMG'	OK	10.9979	14.2517	0.373906	0.783357	0.3534	0.428783	no
CAETHG_0135	CP006763:143966-145439	'ABRINI_FRU'	'ABRINI_RMG'	OK	55.582	14.3432	-1.95425	-4.63237	5e-05	0.00015337	yes
CAETHG_0136	CP006763:145763-146282	'ABRINI_FRU'	'ABRINI_RMG'	OK	37.3786	50.1985	0.425432	1.18534	0.1568	0.215164	no
CAETHG_0137	CP006763:146486-146741	'ABRINI_FRU'	'ABRINI_RMG'	OK	77.1389	493.143	2.67647	13.1673	5e-05	0.00015337	yes
CAETHG_0138	CP006763:146782-148150	'ABRINI_FRU'	'ABRINI_RMG'	OK	58.1454	664.353	3.51421	7.57197	5e-05	0.00015337	yes
CAETHG_0139	CP006763:148418-149042	'ABRINI_FRU'	'ABRINI_RMG'	OK	13.5508	125.363	3.20967	7.70446	5e-05	0.00015337	yes
CAETHG_0140	CP006763:149046-150156	'ABRINI_FRU'	'ABRINI_RMG'	OK	13.9662	80.8594	2.53347	5.346	5e-05	0.00015337	yes
CAETHG_0141	CP006763:150400-151543	'ABRINI_FRU'	'ABRINI_RMG'	OK	23.6215	115.887	2.29454	5.08589	5e-05	0.00015337	yes
CAETHG_0142	CP006763:151623-153522	'ABRINI_FRU'	'ABRINI_RMG'	OK	281.224	10.143	-4.79316	-9.23675	5e-05	0.00015337	yes
CAETHG_0143	CP006763:154007-155662	'ABRINI_FRU'	'ABRINI_RMG'	OK	289.799	14.7598	-4.2953	-7.5373	5e-05	0.00015337	yes
CAETHG_0144	CP006763:154007-155662	'ABRINI_FRU'	'ABRINI_RMG'	OK	316.246	18.575	-4.08961	-6.41258	5e-05	0.00015337	yes
CAETHG_0145	CP006763:156116-157587	'ABRINI_FRU'	'ABRINI_RMG'	OK	5.72725	24.4255	2.09248	1.96064	0.00855	0.0168343	yes
CAETHG_0146	CP006763:156116-157587	'ABRINI_FRU'	'ABRINI_RMG'	OK	50.1385	153.426	1.61355	3.21371	5e-05	0.00015337	yes
CAETHG_0147	CP006763:157634-158688	'ABRINI_FRU'	'ABRINI_RMG'	OK	42.6992	173.104	2.01936	5.02251	5e-05	0.00015337	yes
CAETHG_0148	CP006763:157634-158688	'ABRINI_FRU'	'ABRINI_RMG'	OK	38.4014	149.632	1.96219	2.74109	5e-05	0.00015337	yes
CAETHG_0149	CP006763:158727-159282	'ABRINI_FRU'	'ABRINI_RMG'	OK	25.542	101.021	1.98371	5.25587	5e-05	0.00015337	yes
CAETHG_0150	CP006763:159330-159951	'ABRINI_FRU'	'ABRINI_RMG'	OK	29.7581	169.33	2.50848	6.88279	5e-05	0.00015337	yes
CAETHG_0151	CP006763:159957-161070	'ABRINI_FRU'	'ABRINI_RMG'	OK	28.0576	139.296	2.31169	5.15848	5e-05	0.00015337	yes
CAETHG_0152	CP006763:161166-161292	'ABRINI_FRU'	'ABRINI_RMG'	NOTEST	2.63159	0	#NAME?	0	1	1	no
CAETHG_0153	CP006763:161312-161963	'ABRINI_FRU'	'ABRINI_RMG'	OK	4.38203	27.6701	2.65866	4.53345	5e-05	0.00015337	yes
CAETHG_0154	CP006763:162173-162800	'ABRINI_FRU'	'ABRINI_RMG'	OK	56.0633	329.164	2.55368	7.32583	5e-05	0.00015337	yes
CAETHG_0155	CP006763:162801-163914	'ABRINI_FRU'	'ABRINI_RMG'	OK	86.9187	411.202	2.24211	4.86671	5e-05	0.00015337	yes
CAETHG_0156	CP006763:163960-165355	'ABRINI_FRU'	'ABRINI_RMG'	OK	39.806	108.713	1.44946	3.31174	5e-05	0.00015337	yes
CAETHG_0157	CP006763:165386-165812	'ABRINI_FRU'	'ABRINI_RMG'	OK	49.2545	131.37	1.41531	4.23428	5e-05	0.00015337	yes
CAETHG_0158	CP006763:165861-167415	'ABRINI_FRU'	'ABRINI_RMG'	OK	54.9761	23.1579	-1.2473	-3.93309	5e-05	0.00015337	yes
CAETHG_0159	CP006763:167604-168159	'ABRINI_FRU'	'ABRINI_RMG'	OK	27.5973	26.5127	-0.0578454	-0.148665	0.85855	0.888023	no
CAETHG_0160	CP006763:168284-169130	'ABRINI_FRU'	'ABRINI_RMG'	OK	140.195	106.545	-0.395967	-0.957289	0.1202	0.172042	no
CAETHG_0161	CP006763:169261-169780	'ABRINI_FRU'	'ABRINI_RMG'	OK	7801.33	4926.42	-0.663178	-1.45973	0.0718	0.109855	no
CAETHG_0162	CP006763:169841-170768	'ABRINI_FRU'	'ABRINI_RMG'	OK	26.168	12.0457	-1.11929	-3.02506	0.0009	0.00221219	yes
CAETHG_0163	CP006763:170775-172080	'ABRINI_FRU'	'ABRINI_RMG'	OK	25.8992	17.7816	-0.54252	-1.72774	0.06625	0.102623	no
CAETHG_0164	CP006763:172540-173701	'ABRINI_FRU'	'ABRINI_RMG'	OK	328.14	1142.79	1.80018	4.05657	5e-05	0.00015337	yes
CAETHG_0165	CP006763:174221-175670	'ABRINI_FRU'	'ABRINI_RMG'	OK	8.20218	6.74678	-0.281809	-0.565328	0.39225	0.468763	no
CAETHG_0166	CP006763:175844-176825	'ABRINI_FRU'	'ABRINI_RMG'	OK	18.124	22.4474	0.308647	0.611332	0.2954	0.367775	no
CAETHG_0167	CP006763:176955-177345	'ABRINI_FRU'	'ABRINI_RMG'	OK	30.242	26.8324	-0.172578	-0.467152	0.6254	0.688624	no
CAETHG_0168	CP006763:177434-177830	'ABRINI_FRU'	'ABRINI_RMG'	OK	13.1326	8.58858	-0.612666	-1.3239	0.27605	0.346809	no
CAETHG_0169	CP006763:177968-178886	'ABRINI_FRU'	'ABRINI_RMG'	OK	9.72261	4.98089	-0.964941	-1.66267	0.0151	0.0279371	yes
CAETHG_0170	CP006763:178979-180395	'ABRINI_FRU'	'ABRINI_RMG'	OK	87.149	50.3579	-0.791266	-1.92139	0.0031	0.00678898	yes
CAETHG_0171	CP006763:180480-181371	'ABRINI_FRU'	'ABRINI_RMG'	OK	41.6515	16.064	-1.37454	-4.05288	5e-05	0.00015337	yes
CAETHG_0172	CP006763:181435-182068	'ABRINI_FRU'	'ABRINI_RMG'	OK	77.2229	11.1273	-2.79493	-6.5299	5e-05	0.00015337	yes
CAETHG_0173	CP006763:182583-184437	'ABRINI_FRU'	'ABRINI_RMG'	OK	32.8633	16.1721	-1.02297	-2.44224	0.00015	0.000427948	yes
CAETHG_0174	CP006763:184618-184825	'ABRINI_FRU'	'ABRINI_RMG'	OK	17.3797	26.2051	0.592444	1.90211	0.39395	0.470402	no
CAETHG_0175	CP006763:184841-185702	'ABRINI_FRU'	'ABRINI_RMG'	OK	16.2593	37.9662	1.22345	2.84409	5e-05	0.00015337	yes
CAETHG_0176	CP006763:185713-186193	'ABRINI_FRU'	'ABRINI_RMG'	OK	4.52304	4.48059	-0.0136024	-0.0180531	0.9717	0.97741	no
CAETHG_0177	CP006763:186193-187192	'ABRINI_FRU'	'ABRINI_RMG'	OK	8.25752	7.66052	-0.108267	-0.170528	0.74335	0.791963	no
CAETHG_0178	CP006763:187209-187563	'ABRINI_FRU'	'ABRINI_RMG'	OK	27.3139	27.641	0.0171728	0.0425511	0.9624	0.970609	no
CAETHG_0179	CP006763:187583-187790	'ABRINI_FRU'	'ABRINI_RMG'	OK	389.653	582.576	0.580255	3.64011	0.0394	0.0651497	no
CAETHG_0180	CP006763:188029-188818	'ABRINI_FRU'	'ABRINI_RMG'	OK	103.12	53.3206	-0.951564	-2.38655	0.0004	0.001059	yes
CAETHG_0181	CP006763:188903-189116	'ABRINI_FRU'	'ABRINI_RMG'	OK	2837.92	1354.08	-1.06752	-7.60493	5e-05	0.00015337	yes
CAETHG_0182	CP006763:189157-190931	'ABRINI_FRU'	'ABRINI_RMG'	OK	41.1196	15.0468	-1.45037	-2.80267	5e-05	0.00015337	yes
CAETHG_0183	CP006763:189157-190931	'ABRINI_FRU'	'ABRINI_RMG'	OK	14.6356	5.70555	-1.35905	-1.40043	0.05265	0.0839604	no
CAETHG_0184	CP006763:191190-191194	'ABRINI_FRU'	'ABRINI_RMG'	NOTEST	0	0	0	0	1	1	no
CAETHG_0186	CP006763:192969-193956	'ABRINI_FRU'	'ABRINI_RMG'	OK	9.52049	11.0608	0.216342	0.522596	0.5369	0.609131	no
CAETHG_0187	CP006763:194001-194421	'ABRINI_FRU'	'ABRINI_RMG'	OK	104.205	11.3179	-3.20275	-7.58829	5e-05	0.00015337	yes
CAETHG_0188	CP006763:194545-195163	'ABRINI_FRU'	'ABRINI_RMG'	OK	247.541	96.7302	-1.35563	-4.04481	5e-05	0.00015337	yes
CAETHG_0189	CP006763:195208-196423	'ABRINI_FRU'	'ABRINI_RMG'	OK	166.533	129.65	-0.361191	-0.900075	0.159	0.21761	no
CAETHG_0190	CP006763:196479-196932	'ABRINI_FRU'	'ABRINI_RMG'	OK	106.28	71.4993	-0.571865	-2.305	0.04975	0.0799471	no
CAETHG_0191	CP006763:197103-198129	'ABRINI_FRU'	'ABRINI_RMG'	OK	152.717	100.223	-0.607647	-1.73661	0.0195	0.0351092	yes
CAETHG_0192	CP006763:198159-199236	'ABRINI_FRU'	'ABRINI_RMG'	OK	94.3078	64.7121	-0.543343	-1.3175	0.0389	0.0644344	no
CAETHG_0193	CP006763:199251-199911	'ABRINI_FRU'	'ABRINI_RMG'	OK	210.292	165.657	-0.344197	-0.92428	0.1796	0.241481	no
CAETHG_0194	CP006763:199952-200315	'ABRINI_FRU'	'ABRINI_RMG'	OK	25.7799	8.28239	-1.63813	-3.39782	0.00625	0.0127479	yes
CAETHG_0195	CP006763:200401-200536	'ABRINI_FRU'	'ABRINI_RMG'	NOTEST	16.9538	0	#NAME?	0	1	1	no
CAETHG_0196	CP006763:200764-201913	'ABRINI_FRU'	'ABRINI_RMG'	OK	56.3481	60.1758	0.0948164	0.221783	0.7127	0.766788	no
CAETHG_0197	CP006763:202107-203175	'ABRINI_FRU'	'ABRINI_RMG'	OK	11.5051	16.8737	0.5525	1.18932	0.07255	0.110855	no
CAETHG_0198	CP006763:203283-204621	'ABRINI_FRU'	'ABRINI_RMG'	OK	29.4684	30.1381	0.0324205	0.0707798	0.90115	0.922629	no
CAETHG_0199	CP006763:205362-205980	'ABRINI_FRU'	'ABRINI_RMG'	OK	254.768	71.8424	-1.82627	-6.13015	5e-05	0.00015337	yes
CAETHG_0200	CP006763:206642-207983	'ABRINI_FRU'	'ABRINI_RMG'	OK	408.256	24.5104	-4.05801	-8.75812	5e-05	0.00015337	yes
CAETHG_0201	CP006763:208107-208566	'ABRINI_FRU'	'ABRINI_RMG'	OK	85.9455	91.2408	0.0862573	0.258494	0.7566	0.802724	no
CAETHG_0202	CP006763:208882-209815	'ABRINI_FRU'	'ABRINI_RMG'	OK	34.3715	18.9845	-0.856387	-2.21714	0.0036	0.00776244	yes
CAETHG_0203	CP006763:209894-210086	'ABRINI_FRU'	'ABRINI_RMG'	OK	15.4931	8.52202	-0.862361	-1.98212	0.4078	0.484971	no
CAETHG_0204	CP006763:210371-210830	'ABRINI_FRU'	'ABRINI_RMG'	OK	7.57688	4.3955	-0.785578	-1.03478	0.15465	0.212646	no
CAETHG_0205	CP006763:211059-213081	'ABRINI_FRU'	'ABRINI_RMG'	OK	15.2424	69.086	2.1803	4.67767	5e-05	0.00015337	yes
CAETHG_0206	CP006763:213301-214579	'ABRINI_FRU'	'ABRINI_RMG'	OK	46.637	10.723	-2.12076	-4.55476	5e-05	0.00015337	yes
CAETHG_0207	CP006763:214657-214900	'ABRINI_FRU'	'ABRINI_RMG'	OK	382.237	547.952	0.519582	3.22297	0.05785	0.0912379	no
CAETHG_0208	CP006763:214949-215885	'ABRINI_FRU'	'ABRINI_RMG'	OK	100.424	29.0505	-1.78946	-4.5545	5e-05	0.00015337	yes
CAETHG_0209	CP006763:215893-217723	'ABRINI_FRU'	'ABRINI_RMG'	OK	111.314	41.8659	-1.41078	-3.31475	5e-05	0.00015337	yes
CAETHG_0210	CP006763:217749-220425	'ABRINI_FRU'	'ABRINI_RMG'	OK	45.1425	17.7791	-1.3443	-3.16275	5e-05	0.00015337	yes
CAETHG_0211	CP006763:220441-221785	'ABRINI_FRU'	'ABRINI_RMG'	OK	171.336	79.4502	-1.1087	-2.99833	5e-05	0.00015337	yes
CAETHG_0212	CP006763:221938-222376	'ABRINI_FRU'	'ABRINI_RMG'	OK	5.42955	1.80732	-1.58698	-2.00938	0.1211	0.173093	no
CAETHG_0213	CP006763:222824-224009	'ABRINI_FRU'	'ABRINI_RMG'	OK	810.162	308.466	-1.3931	-2.93984	5e-05	0.00015337	yes
CAETHG_0214	CP006763:224064-224220	'ABRINI_FRU'	'ABRINI_RMG'	OK	194.652	74.4103	-1.38732	-10.6045	0.00785	0.015598	yes
CAETHG_0215	CP006763:224280-225477	'ABRINI_FRU'	'ABRINI_RMG'	OK	664.08	319.321	-1.05635	-2.30705	0.0002	0.000558102	yes
CAETHG_0216	CP006763:225498-226386	'ABRINI_FRU'	'ABRINI_RMG'	OK	285.727	152.689	-0.904044	-2.86049	0.0006	0.00153329	yes
CAETHG_0217	CP006763:226484-226865	'ABRINI_FRU'	'ABRINI_RMG'	OK	883.409	421.472	-1.06764	-3.97875	5e-05	0.00015337	yes
CAETHG_0218	CP006763:227085-228999	'ABRINI_FRU'	'ABRINI_RMG'	OK	397.473	228.497	-0.798679	-1.80272	0.00395	0.00844252	yes
CAETHG_0219	CP006763:229018-229684	'ABRINI_FRU'	'ABRINI_RMG'	OK	389.362	92.5822	-2.07231	-4.94469	5e-05	0.00015337	yes
CAETHG_0220	CP006763:229813-231040	'ABRINI_FRU'	'ABRINI_RMG'	OK	74.379	201.532	1.43804	4.00425	5e-05	0.00015337	yes
CAETHG_0221	CP006763:231126-232002	'ABRINI_FRU'	'ABRINI_RMG'	OK	229.421	206.485	-0.151962	-0.444669	0.55035	0.62144	no
CAETHG_0222	CP006763:232174-232888	'ABRINI_FRU'	'ABRINI_RMG'	OK	25.5569	34.9322	0.450847	1.0949	0.12535	0.177882	no
CAETHG_0223	CP006763:233026-234427	'ABRINI_FRU'	'ABRINI_RMG'	OK	891.818	651.998	-0.451883	-1.25168	0.11335	0.163647	no
CAETHG_0224	CP006763:234673-235255	'ABRINI_FRU'	'ABRINI_RMG'	OK	286.055	421.541	0.559382	1.82801	0.03015	0.0516799	no
CAETHG_0225	CP006763:235370-236204	'ABRINI_FRU'	'ABRINI_RMG'	OK	671.152	1082.54	0.689713	1.56532	0.0161	0.0295915	yes
CAETHG_0226	CP006763:236450-237206	'ABRINI_FRU'	'ABRINI_RMG'	OK	96.0021	64.3455	-0.577226	-1.54901	0.03095	0.0528537	no
CAETHG_0227	CP006763:237280-237883	'ABRINI_FRU'	'ABRINI_RMG'	OK	195.667	156.325	-0.323854	-0.969993	0.21445	0.281121	no
CAETHG_0228	CP006763:238124-239144	'ABRINI_FRU'	'ABRINI_RMG'	OK	50.2863	14.4089	-1.8032	-4.21853	5e-05	0.00015337	yes
CAETHG_0229	CP006763:239179-241174	'ABRINI_FRU'	'ABRINI_RMG'	OK	3.84196	2.20146	-0.803381	-1.27076	0.03495	0.0588175	no
CAETHG_0230	CP006763:241331-241970	'ABRINI_FRU'	'ABRINI_RMG'	OK	8.32069	17.2172	1.04908	1.92857	0.00415	0.00881904	yes
CAETHG_0231	CP006763:242177-243581	'ABRINI_FRU'	'ABRINI_RMG'	OK	11.1515	54.0013	2.27576	4.65457	5e-05	0.00015337	yes
CAETHG_0232	CP006763:243966-245490	'ABRINI_FRU'	'ABRINI_RMG'	OK	9.62605	13.4833	0.486157	0.977643	0.09585	0.141299	no
CAETHG_0233	CP006763:245561-246815	'ABRINI_FRU'	'ABRINI_RMG'	OK	4.54932	6.28153	0.465465	0.742672	0.1829	0.245343	no
CAETHG_0234	CP006763:247032-249060	'ABRINI_FRU'	'ABRINI_RMG'	OK	3.6798	9.78069	1.41031	2.46388	0.0001	0.00029355	yes
CAETHG_0235	CP006763:249395-251204	'ABRINI_FRU'	'ABRINI_RMG'	OK	80.0614	48.4287	-0.725243	-2.26921	0.0061	0.0124685	yes
CAETHG_0236	CP006763:251212-252427	'ABRINI_FRU'	'ABRINI_RMG'	OK	66.2617	40.8326	-0.698455	-2.01862	0.01015	0.0196142	yes
CAETHG_0237	CP006763:252500-253397	'ABRINI_FRU'	'ABRINI_RMG'	OK	15.5846	6.06532	-1.36146	-2.47197	0.0004	0.001059	yes
CAETHG_0238	CP006763:253637-254810	'ABRINI_FRU'	'ABRINI_RMG'	OK	121.166	88.3733	-0.455298	-1.08113	0.07645	0.115872	no
CAETHG_0239	CP006763:254822-255677	'ABRINI_FRU'	'ABRINI_RMG'	OK	67.5557	22.0018	-1.61846	-3.82589	5e-05	0.00015337	yes
CAETHG_0240	CP006763:255714-256935	'ABRINI_FRU'	'ABRINI_RMG'	OK	63.5341	21.4352	-1.56755	-3.46008	5e-05	0.00015337	yes
CAETHG_0241	CP006763:257038-258205	'ABRINI_FRU'	'ABRINI_RMG'	OK	29.2826	7.58078	-1.94963	-4.33719	5e-05	0.00015337	yes
CAETHG_0242	CP006763:258318-261561	'ABRINI_FRU'	'ABRINI_RMG'	OK	6.28366	0.9761	-2.6865	-4.5464	5e-05	0.00015337	yes
CAETHG_0243	CP006763:261831-262386	'ABRINI_FRU'	'ABRINI_RMG'	OK	3.73598	17.449	2.22358	3.55721	0.0011	0.0026571	yes
CAETHG_0244	CP006763:262621-264034	'ABRINI_FRU'	'ABRINI_RMG'	OK	12.8042	64.848	2.34044	3.32272	5e-05	0.00015337	yes
CAETHG_0245	CP006763:264061-265270	'ABRINI_FRU'	'ABRINI_RMG'	OK	5.97268	51.9595	3.12094	4.69683	5e-05	0.00015337	yes
CAETHG_0246	CP006763:265470-266259	'ABRINI_FRU'	'ABRINI_RMG'	OK	4.84689	34.0082	2.81075	3.42779	5e-05	0.00015337	yes
CAETHG_0247	CP006763:266296-267571	'ABRINI_FRU'	'ABRINI_RMG'	OK	4.25486	45.9252	3.4321	4.6339	5e-05	0.00015337	yes
CAETHG_0248	CP006763:267600-269127	'ABRINI_FRU'	'ABRINI_RMG'	OK	2.60691	27.4015	3.39384	5.33292	5e-05	0.00015337	yes
CAETHG_0249	CP006763:269422-270121	'ABRINI_FRU'	'ABRINI_RMG'	OK	203.335	50.2322	-2.01718	-4.97192	5e-05	0.00015337	yes
CAETHG_0250	CP006763:270168-270831	'ABRINI_FRU'	'ABRINI_RMG'	OK	132.58	33.2103	-1.99716	-6.93409	5e-05	0.00015337	yes
CAETHG_0251	CP006763:270871-271597	'ABRINI_FRU'	'ABRINI_RMG'	OK	83.6294	24.8716	-1.74951	-3.88921	5e-05	0.00015337	yes
CAETHG_0252	CP006763:271783-272011	'ABRINI_FRU'	'ABRINI_RMG'	OK	86.5935	158.678	0.873771	4.89272	0.01345	0.0252262	yes
CAETHG_0253	CP006763:272048-273815	'ABRINI_FRU'	'ABRINI_RMG'	OK	56.1281	113.876	1.02067	2.85678	0.0001	0.00029355	yes
CAETHG_0254	CP006763:273829-273991	'ABRINI_FRU'	'ABRINI_RMG'	NOTEST	1.06107	0	#NAME?	0	1	1	no
CAETHG_0255	CP006763:273999-274377	'ABRINI_FRU'	'ABRINI_RMG'	OK	209.28	317.307	0.600448	2.18282	0.02395	0.042084	yes
CAETHG_0256	CP006763:274464-275262	'ABRINI_FRU'	'ABRINI_RMG'	OK	152.316	183.419	0.268072	0.784462	0.2955	0.36782	no
CAETHG_0257	CP006763:275333-277028	'ABRINI_FRU'	'ABRINI_RMG'	OK	183.034	199.701	0.125725	0.297163	0.618	0.682311	no
CAETHG_0258	CP006763:277093-278080	'ABRINI_FRU'	'ABRINI_RMG'	OK	177.854	166.914	-0.0915877	-0.218416	0.7175	0.770506	no
CAETHG_0259	CP006763:278423-279794	'ABRINI_FRU'	'ABRINI_RMG'	OK	45.2581	57.4271	0.343556	0.770231	0.1877	0.250405	no
CAETHG_0260	CP006763:279848-280925	'ABRINI_FRU'	'ABRINI_RMG'	OK	24.0997	42.2632	0.810389	1.98476	0.00405	0.00863052	yes
CAETHG_0261	CP006763:280975-281764	'ABRINI_FRU'	'ABRINI_RMG'	OK	41.5983	37.8358	-0.136774	-0.351165	0.61935	0.683593	no
CAETHG_0262	CP006763:281765-282569	'ABRINI_FRU'	'ABRINI_RMG'	OK	25.7012	24.4192	-0.0738195	-0.215088	0.80865	0.847055	no
CAETHG_0263	CP006763:282630-283742	'ABRINI_FRU'	'ABRINI_RMG'	OK	44.6618	42.5035	-0.0714606	-0.178857	0.78915	0.830726	no
CAETHG_0265	CP006763:283989-285874	'ABRINI_FRU'	'ABRINI_RMG'	OK	14.6746	13.1382	-0.159559	-0.399687	0.6482	0.709168	no
CAETHG_0266	CP006763:283989-285874	'ABRINI_FRU'	'ABRINI_RMG'	OK	25.4928	15.827	-0.687705	-0.896339	0.26545	0.335402	no
CAETHG_0267	CP006763:286071-286350	'ABRINI_FRU'	'ABRINI_RMG'	OK	286.455	206.457	-0.472466	-2.35529	0.0919	0.136088	no
CAETHG_0268	CP006763:286895-287159	'ABRINI_FRU'	'ABRINI_RMG'	OK	774.659	1446.69	0.901118	4.6321	0.0005	0.00129623	yes
CAETHG_0269	CP006763:287194-287803	'ABRINI_FRU'	'ABRINI_RMG'	OK	142.77	220.662	0.628144	2.00044	0.0174	0.031767	yes
CAETHG_0270	CP006763:287985-288153	'ABRINI_FRU'	'ABRINI_RMG'	NOTEST	0	0	0	0	1	1	no
CAETHG_0271	CP006763:288202-289666	'ABRINI_FRU'	'ABRINI_RMG'	OK	79.1069	44.0817	-0.843625	-1.82819	0.00115	0.00276506	yes
CAETHG_0272	CP006763:290077-291898	'ABRINI_FRU'	'ABRINI_RMG'	OK	261.276	161.242	-0.696345	-1.93138	0.0083	0.0163984	yes
CAETHG_0273	CP006763:291934-292366	'ABRINI_FRU'	'ABRINI_RMG'	OK	209.195	92.6652	-1.17475	-4.6975	5e-05	0.00015337	yes
CAETHG_0274	CP006763:292570-292933	'ABRINI_FRU'	'ABRINI_RMG'	OK	207.418	97.2227	-1.09318	-3.56981	0.00045	0.00117913	yes
CAETHG_0275	CP006763:293154-293481	'ABRINI_FRU'	'ABRINI_RMG'	OK	120.487	10.2247	-3.55875	-9.23942	5e-05	0.00015337	yes
CAETHG_0276	CP006763:293531-293732	'ABRINI_FRU'	'ABRINI_RMG'	OK	233.767	108.001	-1.11402	-6.81304	0.0015	0.00351954	yes
CAETHG_0277	CP006763:293978-294818	'ABRINI_FRU'	'ABRINI_RMG'	OK	102.868	31.52	-1.70645	-4.86985	5e-05	0.00015337	yes
CAETHG_0278	CP006763:294874-296275	'ABRINI_FRU'	'ABRINI_RMG'	OK	118.36	126.405	0.0948743	0.212701	0.7065	0.761403	no
CAETHG_0279	CP006763:296478-297420	'ABRINI_FRU'	'ABRINI_RMG'	OK	10.5505	4.13655	-1.3508	-2.18206	0.00125	0.00298859	yes
CAETHG_0280	CP006763:297439-298114	'ABRINI_FRU'	'ABRINI_RMG'	OK	7.87768	4.16618	-0.919046	-1.43605	0.05465	0.0867517	no
CAETHG_0281	CP006763:298130-299063	'ABRINI_FRU'	'ABRINI_RMG'	OK	10.0132	6.77332	-0.563974	-0.980141	0.10785	0.156633	no
CAETHG_0282	CP006763:299087-300161	'ABRINI_FRU'	'ABRINI_RMG'	OK	4.29613	1.61742	-1.40934	-1.5566	0.0062	0.0126571	yes
CAETHG_0283	CP006763:300183-301782	'ABRINI_FRU'	'ABRINI_RMG'	OK	4.97109	2.23207	-1.15518	-1.83435	0.00575	0.0118503	yes
CAETHG_0284	CP006763:301965-303594	'ABRINI_FRU'	'ABRINI_RMG'	OK	34.0462	11.815	-1.52688	-4.27997	5e-05	0.00015337	yes
CAETHG_0285	CP006763:303627-304566	'ABRINI_FRU'	'ABRINI_RMG'	OK	39.769	7.3907	-2.42786	-6.20209	5e-05	0.00015337	yes
CAETHG_0286	CP006763:304821-306280	'ABRINI_FRU'	'ABRINI_RMG'	OK	375.566	297.272	-0.337284	-0.822851	0.3339	0.408654	no
CAETHG_0287	CP006763:304821-306280	'ABRINI_FRU'	'ABRINI_RMG'	OK	120.198	114.949	-0.0644097	-0.0882976	0.8704	0.898364	no
CAETHG_0288	CP006763:306291-306474	'ABRINI_FRU'	'ABRINI_RMG'	OK	98.7596	33.4358	-1.56253	-8.22842	0.015	0.02777	yes
CAETHG_0289	CP006763:306831-306996	'ABRINI_FRU'	'ABRINI_RMG'	OK	186.388	11.8899	-3.9705	-18.0667	0.06545	0.101576	no
CAETHG_0290	CP006763:307215-308115	'ABRINI_FRU'	'ABRINI_RMG'	OK	60.196	30.5181	-0.980002	-2.27418	0.0006	0.00153329	yes
CAETHG_0291	CP006763:308141-309317	'ABRINI_FRU'	'ABRINI_RMG'	OK	336.607	465.72	0.468399	1.20154	0.0825	0.123588	no
CAETHG_0292	CP006763:309478-311776	'ABRINI_FRU'	'ABRINI_RMG'	OK	29.7293	13.8195	-1.10518	-2.56456	0.0002	0.000558102	yes
CAETHG_0293	CP006763:311977-312448	'ABRINI_FRU'	'ABRINI_RMG'	OK	811.376	353.073	-1.2004	-3.70507	5e-05	0.00015337	yes
CAETHG_0294	CP006763:312474-312606	'ABRINI_FRU'	'ABRINI_RMG'	OK	195.712	134.235	-0.543977	-6.92196	0.3676	0.44351	no
CAETHG_0295	CP006763:313030-313204	'ABRINI_FRU'	'ABRINI_RMG'	OK	2058.16	1478.98	-0.476749	-5.96336	0.0717	0.109731	no
CAETHG_0296	CP006763:313310-313721	'ABRINI_FRU'	'ABRINI_RMG'	OK	263.43	334.857	0.346124	1.37541	0.1852	0.247848	no
CAETHG_0297	CP006763:313762-314071	'ABRINI_FRU'	'ABRINI_RMG'	OK	449.559	1230.84	1.45306	5.05592	5e-05	0.00015337	yes
CAETHG_0298	CP006763:314143-315808	'ABRINI_FRU'	'ABRINI_RMG'	OK	80.087	18.4008	-2.1218	-5.12564	5e-05	0.00015337	yes
CAETHG_0299	CP006763:315838-316357	'ABRINI_FRU'	'ABRINI_RMG'	OK	164.057	43.0341	-1.93065	-6.71415	5e-05	0.00015337	yes
CAETHG_0300	CP006763:316457-317162	'ABRINI_FRU'	'ABRINI_RMG'	OK	204.896	118.982	-0.78415	-2.34946	0.00315	0.00688927	yes
CAETHG_0301	CP006763:317202-318510	'ABRINI_FRU'	'ABRINI_RMG'	OK	10.9782	9.00183	-0.286351	-0.530119	0.3456	0.42064	no
CAETHG_0302	CP006763:318630-319194	'ABRINI_FRU'	'ABRINI_RMG'	OK	130.638	69.7127	-0.906081	-2.86416	0.0009	0.00221219	yes
CAETHG_0303	CP006763:319355-320693	'ABRINI_FRU'	'ABRINI_RMG'	OK	25.1996	4.70937	-2.4198	-5.30298	5e-05	0.00015337	yes
CAETHG_0304	CP006763:320793-321255	'ABRINI_FRU'	'ABRINI_RMG'	OK	1016.07	109.192	-3.21806	-9.50763	5e-05	0.00015337	yes
CAETHG_0305	CP006763:321276-322482	'ABRINI_FRU'	'ABRINI_RMG'	OK	451.093	52.2684	-3.10941	-6.44715	5e-05	0.00015337	yes
CAETHG_0306	CP006763:322760-323414	'ABRINI_FRU'	'ABRINI_RMG'	OK	664.172	73.3036	-3.1796	-7.83169	5e-05	0.00015337	yes
CAETHG_0307	CP006763:323429-324548	'ABRINI_FRU'	'ABRINI_RMG'	OK	448.226	38.8367	-3.52873	-7.02754	5e-05	0.00015337	yes
CAETHG_0308	CP006763:324931-326587	'ABRINI_FRU'	'ABRINI_RMG'	OK	2.43465	5.80169	1.25276	1.98936	0.0014	0.00330587	yes
CAETHG_0309	CP006763:326607-327099	'ABRINI_FRU'	'ABRINI_RMG'	OK	2.72361	4.05325	0.573559	0.756324	0.46725	0.543719	no
CAETHG_0310	CP006763:327127-329113	'ABRINI_FRU'	'ABRINI_RMG'	OK	4.26603	6.59414	0.62829	1.2058	0.06165	0.0965011	no
CAETHG_0311	CP006763:329138-329501	'ABRINI_FRU'	'ABRINI_RMG'	OK	7.1177	9.62595	0.435517	0.775233	0.4626	0.539457	no
CAETHG_0313	CP006763:330102-331167	'ABRINI_FRU'	'ABRINI_RMG'	OK	15.4292	6.63492	-1.21751	-2.51862	0.00095	0.00232215	yes
CAETHG_0314	CP006763:331169-331856	'ABRINI_FRU'	'ABRINI_RMG'	OK	32.5943	28.0225	-0.218035	-0.477652	0.4515	0.528555	no
CAETHG_0315	CP006763:331882-332704	'ABRINI_FRU'	'ABRINI_RMG'	OK	48.6205	33.3445	-0.544118	-1.30271	0.0505	0.080903	no
CAETHG_0316	CP006763:333205-334888	'ABRINI_FRU'	'ABRINI_RMG'	OK	74.925	40.9429	-0.871832	-2.35514	0.00075	0.0018728	yes
CAETHG_0317	CP006763:334919-335393	'ABRINI_FRU'	'ABRINI_RMG'	OK	35.9593	11.1755	-1.68602	-3.43036	5e-05	0.00015337	yes
CAETHG_0318	CP006763:335612-336545	'ABRINI_FRU'	'ABRINI_RMG'	OK	38.4085	8.38512	-2.19552	-4.89344	5e-05	0.00015337	yes
CAETHG_0319	CP006763:336740-337916	'ABRINI_FRU'	'ABRINI_RMG'	OK	1417.17	1672.58	0.239057	0.429035	0.4684	0.544836	no
CAETHG_0320	CP006763:338422-338782	'ABRINI_FRU'	'ABRINI_RMG'	OK	182.238	109.89	-0.72976	-2.57792	0.0079	0.0156865	yes
CAETHG_0321	CP006763:338784-339459	'ABRINI_FRU'	'ABRINI_RMG'	OK	105.384	55.0294	-0.937379	-2.13179	0.00055	0.00141656	yes
CAETHG_0322	CP006763:339882-340851	'ABRINI_FRU'	'ABRINI_RMG'	OK	95.1264	30.013	-1.66426	-5.00641	5e-05	0.00015337	yes
CAETHG_0323	CP006763:340864-341572	'ABRINI_FRU'	'ABRINI_RMG'	OK	104.532	9.41384	-3.47302	-7.437	5e-05	0.00015337	yes
CAETHG_0324	CP006763:341590-342653	'ABRINI_FRU'	'ABRINI_RMG'	OK	39.1078	35.6862	-0.132091	-0.295289	0.67215	0.730977	no
CAETHG_0325	CP006763:341590-342653	'ABRINI_FRU'	'ABRINI_RMG'	OK	51.0548	48.7775	-0.0658302	-0.0566367	0.91845	0.935996	no
CAETHG_0326	CP006763:342670-343102	'ABRINI_FRU'	'ABRINI_RMG'	OK	19.34	11.3781	-0.765326	-1.69343	0.0765	0.115933	no
CAETHG_0327	CP006763:343141-345031	'ABRINI_FRU'	'ABRINI_RMG'	OK	17.7114	17.7674	0.00455653	0.00924305	0.98565	0.987544	no
CAETHG_0328	CP006763:345058-345832	'ABRINI_FRU'	'ABRINI_RMG'	OK	10.8067	9.69118	-0.157186	-0.314434	0.66055	0.719932	no
CAETHG_0329	CP006763:345854-349087	'ABRINI_FRU'	'ABRINI_RMG'	OK	6.15229	4.15384	-0.566677	-0.475886	0.57805	0.646669	no
CAETHG_0330	CP006763:345854-349087	'ABRINI_FRU'	'ABRINI_RMG'	OK	10.6425	8.07352	-0.398565	-0.617068	0.2843	0.355848	no
CAETHG_0331	CP006763:345854-349087	'ABRINI_FRU'	'ABRINI_RMG'	OK	25.8012	20.0744	-0.362082	-0.473752	0.6133	0.678362	no
CAETHG_0332	CP006763:345854-349087	'ABRINI_FRU'	'ABRINI_RMG'	OK	11.9058	9.07619	-0.391503	-0.380008	0.6342	0.696509	no
CAETHG_0333	CP006763:349172-352082	'ABRINI_FRU'	'ABRINI_RMG'	OK	20.653	31.1447	0.592636	1.21696	0.02115	0.0376719	yes
CAETHG_0334	CP006763:352182-355209	'ABRINI_FRU'	'ABRINI_RMG'	OK	30.21	33.238	0.137807	0.277376	0.5935	0.660466	no
CAETHG_0335	CP006763:355250-357215	'ABRINI_FRU'	'ABRINI_RMG'	OK	20.6649	16.3422	-0.33858	-0.704667	0.2096	0.275582	no
CAETHG_0336	CP006763:357488-357605	'ABRINI_FRU'	'ABRINI_RMG'	OK	2023.5	1668.46	-0.278333	-9.21716	0.3741	0.450263	no
CAETHG_0337	CP006763:357732-360741	'ABRINI_FRU'	'ABRINI_RMG'	OK	10.2288	16.4864	0.68864	1.31823	0.01035	0.019957	yes
CAETHG_0338	CP006763:360986-362543	'ABRINI_FRU'	'ABRINI_RMG'	OK	113.799	36.5757	-1.63754	-5.73872	5e-05	0.00015337	yes
CAETHG_0339	CP006763:362678-363653	'ABRINI_FRU'	'ABRINI_RMG'	OK	217.863	884.239	2.02102	5.11219	5e-05	0.00015337	yes
CAETHG_0340	CP006763:363701-364085	'ABRINI_FRU'	'ABRINI_RMG'	OK	166.329	698.327	2.06986	7.22953	5e-05	0.00015337	yes
CAETHG_0341	CP006763:364308-365013	'ABRINI_FRU'	'ABRINI_RMG'	OK	74.6069	27.7003	-1.42941	-3.08094	5e-05	0.00015337	yes
CAETHG_0342	CP006763:365084-366881	'ABRINI_FRU'	'ABRINI_RMG'	OK	5.44874	6.28495	0.20598	0.345052	0.51175	0.586047	no
CAETHG_0343	CP006763:366899-367361	'ABRINI_FRU'	'ABRINI_RMG'	NOTEST	1.48242	0.953025	-0.637373	0	1	1	no
CAETHG_0345	CP006763:367914-368352	'ABRINI_FRU'	'ABRINI_RMG'	OK	767.548	92.4039	-3.05423	-13.6305	5e-05	0.00015337	yes
CAETHG_0346	CP006763:368466-369207	'ABRINI_FRU'	'ABRINI_RMG'	OK	15.1761	10.2711	-0.56321	-1.13408	0.1025	0.149735	no
CAETHG_0347	CP006763:369561-370392	'ABRINI_FRU'	'ABRINI_RMG'	OK	4.34765	1.92743	-1.17355	-1.83081	0.09485	0.140004	no
CAETHG_0348	CP006763:370956-372066	'ABRINI_FRU'	'ABRINI_RMG'	OK	23.1574	39.8643	0.783625	2.02137	0.00625	0.0127479	yes
CAETHG_0349	CP006763:372228-372579	'ABRINI_FRU'	'ABRINI_RMG'	OK	171.26	35.1308	-2.28538	-7.08492	5e-05	0.00015337	yes
CAETHG_0350	CP006763:373138-375187	'ABRINI_FRU'	'ABRINI_RMG'	OK	185.713	361.201	0.959725	2.16544	0.0006	0.00153329	yes
CAETHG_0351	CP006763:375364-375889	'ABRINI_FRU'	'ABRINI_RMG'	OK	1389.45	1244.11	-0.1594	-0.475778	0.55675	0.627308	no
CAETHG_0352	CP006763:375918-376440	'ABRINI_FRU'	'ABRINI_RMG'	OK	290.731	93.425	-1.6378	-5.5948	5e-05	0.00015337	yes
CAETHG_0353	CP006763:376522-378238	'ABRINI_FRU'	'ABRINI_RMG'	OK	14.1458	33.9399	1.26261	2.66773	5e-05	0.00015337	yes
CAETHG_0354	CP006763:378469-379947	'ABRINI_FRU'	'ABRINI_RMG'	OK	10.7863	26.9254	1.31976	2.31939	0.0057	0.0117663	yes
CAETHG_0355	CP006763:378469-379947	'ABRINI_FRU'	'ABRINI_RMG'	OK	15.9625	36.5774	1.19626	2.22508	0.00425	0.00901151	yes
CAETHG_0356	CP006763:379948-380725	'ABRINI_FRU'	'ABRINI_RMG'	OK	26.5721	60.5079	1.18721	2.8194	5e-05	0.00015337	yes
CAETHG_0357	CP006763:380763-382796	'ABRINI_FRU'	'ABRINI_RMG'	OK	42.0952	61.6496	0.550436	0.611558	0.45935	0.536212	no
CAETHG_0358	CP006763:380763-382796	'ABRINI_FRU'	'ABRINI_RMG'	OK	147.572	241.655	0.711535	2.12101	0.00965	0.0187523	yes
CAETHG_0359	CP006763:382813-383260	'ABRINI_FRU'	'ABRINI_RMG'	OK	1072.37	1640.49	0.613321	2.19621	0.02015	0.0361264	yes
CAETHG_0360	CP006763:383399-385817	'ABRINI_FRU'	'ABRINI_RMG'	OK	2.71787	1.8371	-0.56505	-0.899355	0.14645	0.203198	no
CAETHG_0361	CP006763:386033-387143	'ABRINI_FRU'	'ABRINI_RMG'	OK	55.8545	11.0564	-2.33679	-5.36753	5e-05	0.00015337	yes
CAETHG_0362	CP006763:387312-388143	'ABRINI_FRU'	'ABRINI_RMG'	OK	9.94449	23.4408	1.23705	2.24482	0.00025	0.000685617	yes
CAETHG_0363	CP006763:388171-389379	'ABRINI_FRU'	'ABRINI_RMG'	OK	2.49958	4.27516	0.774291	1.0594	0.0729	0.111271	no
CAETHG_0365	CP006763:389523-390771	'ABRINI_FRU'	'ABRINI_RMG'	OK	9.53301	4.41984	-1.10894	-1.99467	0.0038	0.00814468	yes
CAETHG_0366	CP006763:390919-394139	'ABRINI_FRU'	'ABRINI_RMG'	OK	410.198	333.36	-0.299238	-0.264423	0.6242	0.687435	no
CAETHG_0367	CP006763:390919-394139	'ABRINI_FRU'	'ABRINI_RMG'	OK	307.063	307.584	0.00244686	0.00212781	0.9964	0.997072	no
CAETHG_0368	CP006763:390919-394139	'ABRINI_FRU'	'ABRINI_RMG'	OK	439.044	604.046	0.460291	0.319051	0.4633	0.540109	no
CAETHG_0369	CP006763:394177-399859	'ABRINI_FRU'	'ABRINI_RMG'	OK	316.09	384.846	0.283943	0.131979	0.7656	0.810249	no
CAETHG_0370	CP006763:394177-399859	'ABRINI_FRU'	'ABRINI_RMG'	OK	305.698	668.32	1.12843	0.696081	0.2087	0.274588	no
CAETHG_0371	CP006763:394177-399859	'ABRINI_FRU'	'ABRINI_RMG'	OK	616.866	1530.31	1.3108	1.01107	0.64945	0.710468	no
CAETHG_0372	CP006763:394177-399859	'ABRINI_FRU'	'ABRINI_RMG'	OK	260.26	690.657	1.40801	1.27659	0.0219	0.0388689	yes
CAETHG_0373	CP006763:394177-399859	'ABRINI_FRU'	'ABRINI_RMG'	OK	157.354	382.734	1.28233	0.48818	0.30335	0.375999	no
CAETHG_0374	CP006763:399859-401922	'ABRINI_FRU'	'ABRINI_RMG'	OK	339.934	1005.28	1.56427	1.96941	0.0013	0.00309394	yes
CAETHG_0375	CP006763:399859-401922	'ABRINI_FRU'	'ABRINI_RMG'	OK	464.275	1112	1.2601	1.0486	0.0308	0.0526446	no
CAETHG_0376	CP006763:402268-403288	'ABRINI_FRU'	'ABRINI_RMG'	OK	20.751	8.28964	-1.3238	-2.94014	0.00015	0.000427948	yes
CAETHG_0377	CP006763:403399-403954	'ABRINI_FRU'	'ABRINI_RMG'	OK	23.8098	6.0637	-1.97328	-4.09333	0.00015	0.000427948	yes
CAETHG_0378	CP006763:404095-404662	'ABRINI_FRU'	'ABRINI_RMG'	OK	26.7853	18.7848	-0.511875	-1.28362	0.12275	0.175015	no
CAETHG_0379	CP006763:404726-405092	'ABRINI_FRU'	'ABRINI_RMG'	OK	75.4513	325.86	2.11063	7.13442	5e-05	0.00015337	yes
CAETHG_0380	CP006763:405108-405669	'ABRINI_FRU'	'ABRINI_RMG'	OK	4.29645	2.79223	-0.621726	-0.79362	0.343	0.417874	no
CAETHG_0381	CP006763:406831-408253	'ABRINI_FRU'	'ABRINI_RMG'	OK	10.9246	4.34278	-1.33089	-2.32839	0.00035	0.000934175	yes
CAETHG_0382	CP006763:408289-409672	'ABRINI_FRU'	'ABRINI_RMG'	OK	80.0437	46.8374	-0.773128	-1.63233	0.0026	0.00579355	yes
CAETHG_0383	CP006763:410260-411238	'ABRINI_FRU'	'ABRINI_RMG'	OK	218.806	62.6573	-1.8041	-5.16406	5e-05	0.00015337	yes
CAETHG_0384	CP006763:411330-412962	'ABRINI_FRU'	'ABRINI_RMG'	OK	35.437	30.9991	-0.193029	-0.437413	0.4811	0.557291	no
CAETHG_0385	CP006763:413108-414182	'ABRINI_FRU'	'ABRINI_RMG'	OK	1583.11	4077.79	1.36502	1.95546	0.00155	0.00362204	yes
CAETHG_0386	CP006763:414372-416313	'ABRINI_FRU'	'ABRINI_RMG'	OK	40.9698	47.1626	0.203083	0.448391	0.42835	0.505427	no
CAETHG_0387	CP006763:416322-417630	'ABRINI_FRU'	'ABRINI_RMG'	OK	37.191	35.997	-0.0470756	-0.113217	0.85855	0.888023	no
CAETHG_0388	CP006763:417984-420367	'ABRINI_FRU'	'ABRINI_RMG'	OK	94.9299	95.0111	0.00123297	0.0019261	0.9973	0.997387	no
CAETHG_0389	CP006763:417984-420367	'ABRINI_FRU'	'ABRINI_RMG'	OK	83.8199	131.985	0.655013	1.6908	0.0381	0.063338	no
CAETHG_0390	CP006763:420414-421680	'ABRINI_FRU'	'ABRINI_RMG'	OK	115.835	127.124	0.134168	0.302027	0.59195	0.659325	no
CAETHG_0391	CP006763:421683-423903	'ABRINI_FRU'	'ABRINI_RMG'	OK	124.133	56.0234	-1.14778	-2.75707	5e-05	0.00015337	yes
CAETHG_0392	CP006763:423989-424823	'ABRINI_FRU'	'ABRINI_RMG'	OK	80.9579	24.8501	-1.70392	-3.87774	5e-05	0.00015337	yes
CAETHG_0393	CP006763:424856-425315	'ABRINI_FRU'	'ABRINI_RMG'	OK	55.2798	11.0991	-2.31631	-5.72251	5e-05	0.00015337	yes
CAETHG_0394	CP006763:425556-428031	'ABRINI_FRU'	'ABRINI_RMG'	OK	94.0547	59.9038	-0.650852	-1.69942	0.0114	0.0217585	yes
CAETHG_0395	CP006763:428111-430529	'ABRINI_FRU'	'ABRINI_RMG'	OK	213.972	329.175	0.62143	1.24117	0.0276	0.0477587	yes
CAETHG_0396	CP006763:430748-431564	'ABRINI_FRU'	'ABRINI_RMG'	OK	300.351	1287.81	2.10019	5.09305	5e-05	0.00015337	yes
CAETHG_0397	CP006763:431833-432289	'ABRINI_FRU'	'ABRINI_RMG'	OK	4.88732	0.442506	-3.46527	-1.92911	0.159	0.21761	no
CAETHG_0398	CP006763:432316-432679	'ABRINI_FRU'	'ABRINI_RMG'	OK	9.30978	0.385109	-4.59541	-2.19941	0.2251	0.29244	no
CAETHG_0399	CP006763:432870-432966	'ABRINI_FRU'	'ABRINI_RMG'	NOTEST	9.15328	0	#NAME?	0	1	1	no
CAETHG_0400	CP006763:432986-433424	'ABRINI_FRU'	'ABRINI_RMG'	NOTEST	1.75546	1.22609	-0.517787	0	1	1	no
CAETHG_0401	CP006763:433733-434042	'ABRINI_FRU'	'ABRINI_RMG'	NOTEST	3.85266	0.88297	-2.12542	0	1	1	no
CAETHG_0402	CP006763:434336-436615	'ABRINI_FRU'	'ABRINI_RMG'	OK	108.227	60.9868	-0.827486	-1.77331	0.00295	0.00649147	yes
CAETHG_0403	CP006763:434336-436615	'ABRINI_FRU'	'ABRINI_RMG'	OK	19.3605	8.02474	-1.27059	-0.882052	0.10015	0.146751	no
CAETHG_0404	CP006763:436786-437173	'ABRINI_FRU'	'ABRINI_RMG'	OK	28.5913	6.25411	-2.1927	-4.47605	0.00125	0.00298859	yes
CAETHG_0405	CP006763:437501-438293	'ABRINI_FRU'	'ABRINI_RMG'	OK	175.351	1950.51	3.47554	9.31482	5e-05	0.00015337	yes
CAETHG_0406	CP006763:438344-440021	'ABRINI_FRU'	'ABRINI_RMG'	OK	1430.58	269.23	-2.40969	-3.81158	5e-05	0.00015337	yes
CAETHG_0407	CP006763:440601-442020	'ABRINI_FRU'	'ABRINI_RMG'	OK	196.206	13.163	-3.89781	-8.14342	5e-05	0.00015337	yes
CAETHG_0408	CP006763:442502-443915	'ABRINI_FRU'	'ABRINI_RMG'	OK	17.3114	14.8514	-0.221119	-0.448863	0.429	0.505829	no
CAETHG_0409	CP006763:444755-445430	'ABRINI_FRU'	'ABRINI_RMG'	OK	168.353	220.13	0.386866	1.22869	0.13735	0.1922	no
CAETHG_0410	CP006763:445520-446696	'ABRINI_FRU'	'ABRINI_RMG'	OK	215.335	284.424	0.401461	0.87574	0.1254	0.177887	no
CAETHG_0411	CP006763:446754-448959	'ABRINI_FRU'	'ABRINI_RMG'	OK	95.2596	67.5633	-0.495625	-1.13683	0.0519	0.0829258	no
CAETHG_0412	CP006763:449469-449949	'ABRINI_FRU'	'ABRINI_RMG'	OK	654.13	721.61	0.141643	0.430893	0.5857	0.653634	no
CAETHG_0413	CP006763:450009-450576	'ABRINI_FRU'	'ABRINI_RMG'	OK	42.1471	26.8748	-0.649179	-1.74237	0.0328	0.0556649	no
CAETHG_0414	CP006763:450700-450856	'ABRINI_FRU'	'ABRINI_RMG'	OK	62.1667	111.024	0.83666	5.42228	0.12765	0.180654	no
CAETHG_0415	CP006763:451384-452761	'ABRINI_FRU'	'ABRINI_RMG'	OK	2.25725	2.66652	0.240394	0.304814	0.58515	0.653211	no
CAETHG_0416	CP006763:452777-454298	'ABRINI_FRU'	'ABRINI_RMG'	NOTEST	1.08399	1.17735	0.119181	0	1	1	no
CAETHG_0417	CP006763:454474-455302	'ABRINI_FRU'	'ABRINI_RMG'	NOTEST	0.6705	0.890738	0.409764	0	1	1	no
CAETHG_0418	CP006763:455398-456670	'ABRINI_FRU'	'ABRINI_RMG'	OK	1.93857	1.28393	-0.594427	-0.609526	0.27595	0.346759	no
CAETHG_0419	CP006763:456892-457624	'ABRINI_FRU'	'ABRINI_RMG'	OK	9.61351	4.28573	-1.16552	-1.72447	0.0077	0.0153292	yes
CAETHG_0420	CP006763:458201-459158	'ABRINI_FRU'	'ABRINI_RMG'	OK	2.13356	4.88086	1.19388	1.56051	0.0214	0.0380758	yes
CAETHG_0421	CP006763:459263-460220	'ABRINI_FRU'	'ABRINI_RMG'	OK	1.8548	11.9703	2.69012	3.43938	5e-05	0.00015337	yes
CAETHG_0422	CP006763:460260-461586	'ABRINI_FRU'	'ABRINI_RMG'	OK	0.64127	6.74961	3.3958	3.30036	0.0002	0.000558102	yes
CAETHG_0423	CP006763:461668-464017	'ABRINI_FRU'	'ABRINI_RMG'	OK	0.841768	4.20803	2.32165	2.87205	0.0001	0.00029355	yes
CAETHG_0424	CP006763:464018-464486	'ABRINI_FRU'	'ABRINI_RMG'	OK	0.704447	2.06682	1.55285	0.985917	0.2201	0.287312	no
CAETHG_0425	CP006763:464488-465325	'ABRINI_FRU'	'ABRINI_RMG'	OK	2.0114	3.49834	0.798473	0.968442	0.16445	0.223946	no
CAETHG_0426	CP006763:465441-465783	'ABRINI_FRU'	'ABRINI_RMG'	OK	2.47226	4.02448	0.702973	0.772784	0.4774	0.553788	no
CAETHG_0427	CP006763:465785-467656	'ABRINI_FRU'	'ABRINI_RMG'	OK	2.9718	6.74134	1.1817	1.57366	0.0088	0.0172732	yes
CAETHG_0428	CP006763:465785-467656	'ABRINI_FRU'	'ABRINI_RMG'	OK	3.11568	9.40732	1.59424	1.44251	0.0127	0.0239724	yes
CAETHG_0429	CP006763:467704-468496	'ABRINI_FRU'	'ABRINI_RMG'	OK	2.2144	4.93278	1.15548	1.38713	0.0316	0.0538275	no
CAETHG_0430	CP006763:468510-469926	'ABRINI_FRU'	'ABRINI_RMG'	OK	0.789424	3.02123	1.93627	1.98084	0.00555	0.0114856	yes
CAETHG_0431	CP006763:469941-472483	'ABRINI_FRU'	'ABRINI_RMG'	OK	0.925872	3.72291	2.00755	1.7111	0.0078	0.0155067	yes
CAETHG_0432	CP006763:469941-472483	'ABRINI_FRU'	'ABRINI_RMG'	OK	4.25002	1.25371	-1.76127	-1.40562	0.0516	0.0824809	no
CAETHG_0433	CP006763:472648-474331	'ABRINI_FRU'	'ABRINI_RMG'	OK	5.42618	1.31753	-2.0421	-3.06221	0.0001	0.00029355	yes
CAETHG_0434	CP006763:474577-474979	'ABRINI_FRU'	'ABRINI_RMG'	OK	620.168	494.068	-0.32795	-1.26966	0.213	0.279444	no
CAETHG_0435	CP006763:475274-476387	'ABRINI_FRU'	'ABRINI_RMG'	OK	2.69687	2.8389	0.0740466	0.0930417	0.8736	0.900937	no
CAETHG_0436	CP006763:476392-476800	'ABRINI_FRU'	'ABRINI_RMG'	OK	4.59175	5.41812	0.238749	0.32021	0.7109	0.765282	no
CAETHG_0437	CP006763:476805-478893	'ABRINI_FRU'	'ABRINI_RMG'	OK	2.02394	2.99775	0.566717	0.8831	0.14815	0.205135	no
CAETHG_0438	CP006763:478952-479906	'ABRINI_FRU'	'ABRINI_RMG'	OK	3.13798	8.5762	1.4505	2.06121	0.00135	0.00320032	yes
CAETHG_0439	CP006763:479926-480244	'ABRINI_FRU'	'ABRINI_RMG'	NOTEST	1.14609	2.71534	1.24442	0	1	1	no
CAETHG_0440	CP006763:480275-481223	'ABRINI_FRU'	'ABRINI_RMG'	OK	1.70532	6.25344	1.8746	2.30262	0.00185	0.00424183	yes
CAETHG_0441	CP006763:481238-482030	'ABRINI_FRU'	'ABRINI_RMG'	OK	0.61848	2.51528	2.02392	1.45714	0.04695	0.0761734	no
CAETHG_0442	CP006763:482030-482954	'ABRINI_FRU'	'ABRINI_RMG'	OK	1.92023	7.19996	1.90671	2.47361	0.00165	0.00382764	yes
CAETHG_0443	CP006763:483197-485283	'ABRINI_FRU'	'ABRINI_RMG'	OK	162.336	242.78	0.580666	0.900178	0.2134	0.27984	no
CAETHG_0444	CP006763:483197-485283	'ABRINI_FRU'	'ABRINI_RMG'	OK	116.148	242.688	1.06314	1.80794	0.0005	0.00129623	yes
CAETHG_0445	CP006763:485578-486529	'ABRINI_FRU'	'ABRINI_RMG'	OK	55.0515	173.208	1.65365	3.57521	5e-05	0.00015337	yes
CAETHG_0446	CP006763:486547-487756	'ABRINI_FRU'	'ABRINI_RMG'	OK	59.352	272.245	2.19754	4.83758	5e-05	0.00015337	yes
CAETHG_0447	CP006763:487783-489112	'ABRINI_FRU'	'ABRINI_RMG'	OK	41.8408	226.835	2.43866	5.88445	5e-05	0.00015337	yes
CAETHG_0448	CP006763:489142-492160	'ABRINI_FRU'	'ABRINI_RMG'	OK	60.9097	291.017	2.25636	4.42028	5e-05	0.00015337	yes
CAETHG_0449	CP006763:492191-493388	'ABRINI_FRU'	'ABRINI_RMG'	OK	117.079	579.343	2.30694	5.04201	5e-05	0.00015337	yes
CAETHG_0450	CP006763:494109-495465	'ABRINI_FRU'	'ABRINI_RMG'	OK	10.2475	113.902	3.47445	8.26989	5e-05	0.00015337	yes
CAETHG_0451	CP006763:495628-496810	'ABRINI_FRU'	'ABRINI_RMG'	OK	57.4839	216.357	1.91218	4.52119	5e-05	0.00015337	yes
CAETHG_0452	CP006763:497234-498839	'ABRINI_FRU'	'ABRINI_RMG'	OK	13.4384	49.1824	1.87178	4.38413	5e-05	0.00015337	yes
CAETHG_0453	CP006763:499002-499161	'ABRINI_FRU'	'ABRINI_RMG'	NOTEST	0	0	0	0	1	1	no
CAETHG_0454	CP006763:499397-502791	'ABRINI_FRU'	'ABRINI_RMG'	OK	19.3912	110.679	2.51291	3.03937	5e-05	0.00015337	yes
CAETHG_0455	CP006763:499397-502791	'ABRINI_FRU'	'ABRINI_RMG'	OK	38.6665	245.835	2.66853	3.71667	5e-05	0.00015337	yes
CAETHG_0456	CP006763:499397-502791	'ABRINI_FRU'	'ABRINI_RMG'	OK	11.3965	82.3567	2.85329	3.85159	5e-05	0.00015337	yes
CAETHG_0457	CP006763:502831-505396	'ABRINI_FRU'	'ABRINI_RMG'	OK	14.8278	99.5208	2.74669	5.3911	5e-05	0.00015337	yes
CAETHG_0458	CP006763:505502-506429	'ABRINI_FRU'	'ABRINI_RMG'	OK	55.8355	31.2196	-0.838731	-2.0881	0.00265	0.00589009	yes
CAETHG_0459	CP006763:506542-507130	'ABRINI_FRU'	'ABRINI_RMG'	OK	78.2586	77.8041	-0.0084032	-0.0264126	0.9753	0.980257	no
CAETHG_0460	CP006763:507229-508939	'ABRINI_FRU'	'ABRINI_RMG'	OK	49.4418	173.261	1.80914	4.1154	5e-05	0.00015337	yes
CAETHG_0461	CP006763:509216-510641	'ABRINI_FRU'	'ABRINI_RMG'	OK	202.385	879.922	2.12028	4.23965	5e-05	0.00015337	yes
CAETHG_0462	CP006763:510706-511990	'ABRINI_FRU'	'ABRINI_RMG'	OK	39.346	182.814	2.21609	5.21533	5e-05	0.00015337	yes
CAETHG_0463	CP006763:512417-514313	'ABRINI_FRU'	'ABRINI_RMG'	OK	67.8188	494.711	2.86683	6.23749	5e-05	0.00015337	yes
CAETHG_0464	CP006763:514326-517058	'ABRINI_FRU'	'ABRINI_RMG'	OK	105.653	82.0772	-0.364284	-0.47539	0.51245	0.586556	no
CAETHG_0465	CP006763:514326-517058	'ABRINI_FRU'	'ABRINI_RMG'	OK	79.9117	98.4337	0.300746	0.498996	0.45195	0.528974	no
CAETHG_0466	CP006763:514326-517058	'ABRINI_FRU'	'ABRINI_RMG'	OK	48.1906	80.1403	0.733777	0.790261	0.1134	0.163699	no
CAETHG_0467	CP006763:517060-518374	'ABRINI_FRU'	'ABRINI_RMG'	OK	3.71393	6.73567	0.858873	1.45711	0.0229	0.0404435	yes
CAETHG_0468	CP006763:518504-518897	'ABRINI_FRU'	'ABRINI_RMG'	OK	9.24876	13.0683	0.498735	0.943846	0.31235	0.385799	no
CAETHG_0469	CP006763:518987-519194	'ABRINI_FRU'	'ABRINI_RMG'	OK	2.47497	11.7301	2.24473	2.96871	0.1904	0.253712	no
CAETHG_0470	CP006763:519196-521470	'ABRINI_FRU'	'ABRINI_RMG'	OK	11.0985	35.837	1.69108	3.54554	5e-05	0.00015337	yes
CAETHG_0471	CP006763:521737-524461	'ABRINI_FRU'	'ABRINI_RMG'	OK	19.6946	13.2518	-0.571613	-1.01362	0.0319	0.0543143	no
CAETHG_0472	CP006763:524656-526555	'ABRINI_FRU'	'ABRINI_RMG'	OK	347.101	723.333	1.0593	2.03221	0.00095	0.00232215	yes
CAETHG_0473	CP006763:527072-529873	'ABRINI_FRU'	'ABRINI_RMG'	OK	50.5587	172.024	1.76658	2.78377	5e-05	0.00015337	yes
CAETHG_0474	CP006763:527072-529873	'ABRINI_FRU'	'ABRINI_RMG'	OK	41.1598	140.125	1.76741	2.19269	5e-05	0.00015337	yes
CAETHG_0475	CP006763:529878-530259	'ABRINI_FRU'	'ABRINI_RMG'	OK	48.1033	182.06	1.92021	6.481	5e-05	0.00015337	yes
CAETHG_0476	CP006763:530275-531382	'ABRINI_FRU'	'ABRINI_RMG'	OK	52.6167	148.912	1.50086	3.44886	5e-05	0.00015337	yes
CAETHG_0477	CP006763:531711-532980	'ABRINI_FRU'	'ABRINI_RMG'	OK	25.5239	66.7292	1.38647	2.88932	5e-05	0.00015337	yes
CAETHG_0478	CP006763:533418-535713	'ABRINI_FRU'	'ABRINI_RMG'	OK	24.741	81.5154	1.72017	3.63481	5e-05	0.00015337	yes
CAETHG_0479	CP006763:535755-536589	'ABRINI_FRU'	'ABRINI_RMG'	OK	13.7885	36.7265	1.41335	3.25032	5e-05	0.00015337	yes
CAETHG_0480	CP006763:537168-538152	'ABRINI_FRU'	'ABRINI_RMG'	OK	112.512	51.9947	-1.11364	-2.98046	5e-05	0.00015337	yes
CAETHG_0481	CP006763:538296-539595	'ABRINI_FRU'	'ABRINI_RMG'	OK	5.68807	15.496	1.44588	2.87247	5e-05	0.00015337	yes
CAETHG_0482	CP006763:540025-541021	'ABRINI_FRU'	'ABRINI_RMG'	OK	60.3136	41.2218	-0.549075	-1.19914	0.03505	0.0589426	no
CAETHG_0483	CP006763:541536-542937	'ABRINI_FRU'	'ABRINI_RMG'	OK	26.921	19.0508	-0.498875	-1.41359	0.0814	0.12218	no
CAETHG_0484	CP006763:542970-543705	'ABRINI_FRU'	'ABRINI_RMG'	OK	120.572	118.153	-0.0292378	-0.0720738	0.91175	0.93132	no
CAETHG_0485	CP006763:543814-545298	'ABRINI_FRU'	'ABRINI_RMG'	OK	33.4693	21.3578	-0.648074	-1.32983	0.04995	0.0802348	no
CAETHG_0486	CP006763:543814-545298	'ABRINI_FRU'	'ABRINI_RMG'	OK	70.486	59.9928	-0.232549	-0.266506	0.633	0.695445	no
CAETHG_0487	CP006763:545454-545859	'ABRINI_FRU'	'ABRINI_RMG'	OK	9.46342	9.69329	0.034625	0.0684159	0.94555	0.957827	no
CAETHG_0488	CP006763:545926-546865	'ABRINI_FRU'	'ABRINI_RMG'	OK	17.2862	17.7705	0.0398595	0.094044	0.8983	0.920533	no
CAETHG_0489	CP006763:546867-547886	'ABRINI_FRU'	'ABRINI_RMG'	OK	15.5198	24.8812	0.680944	1.4052	0.59315	0.660277	no
CAETHG_0490	CP006763:546867-547886	'ABRINI_FRU'	'ABRINI_RMG'	OK	11.859	16.5602	0.481735	0.823019	0.1465	0.203243	no
CAETHG_0491	CP006763:548124-549477	'ABRINI_FRU'	'ABRINI_RMG'	OK	204.315	314.636	0.622886	1.30719	0.0194	0.0349566	yes
CAETHG_0492	CP006763:550054-550972	'ABRINI_FRU'	'ABRINI_RMG'	OK	123.867	130.944	0.0801549	0.240179	0.75975	0.805395	no
CAETHG_0493	CP006763:551068-552603	'ABRINI_FRU'	'ABRINI_RMG'	OK	11.0523	2.33668	-2.24181	-3.50273	0.00025	0.000685617	yes
CAETHG_0494	CP006763:551068-552603	'ABRINI_FRU'	'ABRINI_RMG'	NOTEST	2.6584	0.342398	-2.95682	0	1	1	no
CAETHG_0495	CP006763:553480-554281	'ABRINI_FRU'	'ABRINI_RMG'	OK	6.85689	17.0219	1.31176	2.39937	0.0003	0.000809958	yes
CAETHG_0496	CP006763:554320-555823	'ABRINI_FRU'	'ABRINI_RMG'	OK	12.307	37.022	1.58891	3.37519	5e-05	0.00015337	yes
CAETHG_0497	CP006763:555941-556856	'ABRINI_FRU'	'ABRINI_RMG'	OK	19.7137	12.1513	-0.698093	-1.37741	0.02245	0.0397222	yes
CAETHG_0498	CP006763:556890-558033	'ABRINI_FRU'	'ABRINI_RMG'	OK	11.1971	2.53761	-2.14158	-3.32087	5e-05	0.00015337	yes
CAETHG_0499	CP006763:558037-558670	'ABRINI_FRU'	'ABRINI_RMG'	OK	8.07067	2.32153	-1.79761	-2.42316	0.01055	0.0202847	yes
CAETHG_0500	CP006763:559248-559452	'ABRINI_FRU'	'ABRINI_RMG'	OK	294.35	45.0552	-2.70777	-15.086	5e-05	0.00015337	yes
CAETHG_0501	CP006763:559504-560335	'ABRINI_FRU'	'ABRINI_RMG'	OK	136.517	7.05121	-4.27506	-7.9663	5e-05	0.00015337	yes
CAETHG_0502	CP006763:560341-561907	'ABRINI_FRU'	'ABRINI_RMG'	OK	128.331	3.20463	-5.32357	-9.67249	5e-05	0.00015337	yes
CAETHG_0503	CP006763:561932-562847	'ABRINI_FRU'	'ABRINI_RMG'	OK	141.462	3.8129	-5.21338	-9.04042	5e-05	0.00015337	yes
CAETHG_0504	CP006763:563061-564216	'ABRINI_FRU'	'ABRINI_RMG'	OK	175.169	201.51	0.202099	0.492403	0.4241	0.501289	no
CAETHG_0505	CP006763:564357-565134	'ABRINI_FRU'	'ABRINI_RMG'	OK	22.5703	12.417	-0.862114	-2.1531	0.0112	0.0214052	yes
CAETHG_0506	CP006763:565231-566824	'ABRINI_FRU'	'ABRINI_RMG'	OK	72.2286	148.221	1.03711	2.77875	5e-05	0.00015337	yes
CAETHG_0507	CP006763:566956-567502	'ABRINI_FRU'	'ABRINI_RMG'	OK	57.1486	95.3131	0.737957	2.40605	0.01005	0.019457	yes
CAETHG_0508	CP006763:567522-567891	'ABRINI_FRU'	'ABRINI_RMG'	OK	191.394	339.537	0.827023	3.10581	0.0012	0.00287864	yes
CAETHG_0509	CP006763:568164-568644	'ABRINI_FRU'	'ABRINI_RMG'	OK	100.561	105.408	0.0679046	0.181245	0.80755	0.846057	no
CAETHG_0510	CP006763:568657-570463	'ABRINI_FRU'	'ABRINI_RMG'	OK	50.4734	148.817	1.55994	4.61682	5e-05	0.00015337	yes
CAETHG_0511	CP006763:570576-571806	'ABRINI_FRU'	'ABRINI_RMG'	OK	67.5911	109.069	0.690334	2.02748	0.0089	0.0174396	yes
CAETHG_0512	CP006763:571848-573481	'ABRINI_FRU'	'ABRINI_RMG'	OK	11.5713	12.7114	0.135574	0.267297	0.72	0.772468	no
CAETHG_0513	CP006763:571848-573481	'ABRINI_FRU'	'ABRINI_RMG'	OK	11.8788	10.5861	-0.16621	-0.23454	0.7613	0.80674	no
CAETHG_0514	CP006763:573630-573777	'ABRINI_FRU'	'ABRINI_RMG'	NOTEST	0.827584	0	#NAME?	0	1	1	no
CAETHG_0515	CP006763:574074-574815	'ABRINI_FRU'	'ABRINI_RMG'	OK	12.1894	11.0843	-0.137108	-0.298768	0.70285	0.75811	no
CAETHG_0516	CP006763:574968-576271	'ABRINI_FRU'	'ABRINI_RMG'	OK	25.1368	11.685	-1.10514	-2.03337	0.2025	0.267782	no
CAETHG_0517	CP006763:574968-576271	'ABRINI_FRU'	'ABRINI_RMG'	OK	17.9697	12.9765	-0.469667	-0.969341	0.3507	0.425808	no
CAETHG_0518	CP006763:574968-576271	'ABRINI_FRU'	'ABRINI_RMG'	OK	13.9952	5.41952	-1.36869	-1.09628	0.1587	0.217329	no
CAETHG_0519	CP006763:576738-576930	'ABRINI_FRU'	'ABRINI_RMG'	OK	59.5749	16.1814	-1.88037	-6.23981	0.0192	0.0346343	yes
CAETHG_0520	CP006763:577040-577655	'ABRINI_FRU'	'ABRINI_RMG'	OK	148.783	76.8173	-0.953705	-2.90737	0.00035	0.000934175	yes
CAETHG_0521	CP006763:577917-578439	'ABRINI_FRU'	'ABRINI_RMG'	OK	13.4943	1.37102	-3.29903	-4.47794	0.02775	0.0479893	yes
CAETHG_0522	CP006763:578465-578687	'ABRINI_FRU'	'ABRINI_RMG'	OK	23.7258	4.32769	-2.45479	-4.71875	0.0662	0.102559	no
CAETHG_0523	CP006763:578708-579431	'ABRINI_FRU'	'ABRINI_RMG'	OK	12.1538	3.11956	-1.962	-3.31379	0.00115	0.00276506	yes
CAETHG_0524	CP006763:579508-579604	'ABRINI_FRU'	'ABRINI_RMG'	NOTEST	0	0	0	0	1	1	no
CAETHG_0525	CP006763:579688-580159	'ABRINI_FRU'	'ABRINI_RMG'	OK	8.24146	3.11165	-1.40522	-1.97449	0.04025	0.0663544	no
CAETHG_0526	CP006763:580288-580834	'ABRINI_FRU'	'ABRINI_RMG'	OK	9.36632	2.77322	-1.75592	-2.536	0.0131	0.0246463	yes
CAETHG_0527	CP006763:580881-581325	'ABRINI_FRU'	'ABRINI_RMG'	OK	9.25149	2.36832	-1.96582	-2.37277	0.0189	0.0341468	yes
CAETHG_0528	CP006763:581433-581664	'ABRINI_FRU'	'ABRINI_RMG'	NOTEST	1.23337	0.979316	-0.332757	0	1	1	no
CAETHG_0529	CP006763:581952-583905	'ABRINI_FRU'	'ABRINI_RMG'	OK	41.527	22.3179	-0.895847	-1.93688	0.0007	0.00176059	yes
CAETHG_0530	CP006763:584203-585780	'ABRINI_FRU'	'ABRINI_RMG'	OK	2.24315	3.49818	0.641079	0.733379	0.37975	0.45644	no
CAETHG_0531	CP006763:584203-585780	'ABRINI_FRU'	'ABRINI_RMG'	OK	2.17382	2.12309	-0.0340694	-0.0283279	0.968	0.9748	no
CAETHG_0532	CP006763:585923-586931	'ABRINI_FRU'	'ABRINI_RMG'	OK	17.0137	2.98284	-2.51194	-4.13712	5e-05	0.00015337	yes
CAETHG_0533	CP006763:587137-588058	'ABRINI_FRU'	'ABRINI_RMG'	OK	13.0446	5.36548	-1.28167	-2.71826	0.00235	0.00527956	yes
CAETHG_0534	CP006763:588063-588936	'ABRINI_FRU'	'ABRINI_RMG'	OK	20.4658	14.0396	-0.543717	-1.12316	0.07535	0.114341	no
CAETHG_0535	CP006763:588958-592618	'ABRINI_FRU'	'ABRINI_RMG'	OK	18.8094	9.6001	-0.970329	-2.26795	0.0004	0.001059	yes
CAETHG_0536	CP006763:592839-593160	'ABRINI_FRU'	'ABRINI_RMG'	OK	259.592	184.742	-0.490733	-2.39046	0.0797	0.120005	no
CAETHG_0537	CP006763:593226-594372	'ABRINI_FRU'	'ABRINI_RMG'	OK	918.113	2829.27	1.62368	2.64713	5e-05	0.00015337	yes
CAETHG_0538	CP006763:594414-596655	'ABRINI_FRU'	'ABRINI_RMG'	OK	123.623	97.1594	-0.347517	-0.717549	0.18255	0.244959	no
CAETHG_0539	CP006763:596657-596957	'ABRINI_FRU'	'ABRINI_RMG'	OK	103.495	39.6412	-1.38448	-5.49907	0.00025	0.000685617	yes
CAETHG_0540	CP006763:597252-598971	'ABRINI_FRU'	'ABRINI_RMG'	OK	39.9274	67.7551	0.762949	1.81845	0.00375	0.00805106	yes
CAETHG_0541	CP006763:599531-599738	'ABRINI_FRU'	'ABRINI_RMG'	OK	26.8858	24.7155	-0.121432	-0.414074	0.8454	0.877615	no
CAETHG_0542	CP006763:599795-601790	'ABRINI_FRU'	'ABRINI_RMG'	OK	8.68833	83.9532	3.27243	6.88276	5e-05	0.00015337	yes
CAETHG_0543	CP006763:602077-602623	'ABRINI_FRU'	'ABRINI_RMG'	OK	240.757	238.003	-0.0165975	-0.0475855	0.9508	0.96204	no
CAETHG_0544	CP006763:602694-603864	'ABRINI_FRU'	'ABRINI_RMG'	OK	136.872	92.6855	-0.562413	-1.50207	0.02625	0.045643	yes
CAETHG_0545	CP006763:604101-604308	'ABRINI_FRU'	'ABRINI_RMG'	OK	28.6044	46.3195	0.695382	2.5899	0.1841	0.246693	no
CAETHG_0546	CP006763:604320-604851	'ABRINI_FRU'	'ABRINI_RMG'	OK	12.9768	19.9364	0.619474	1.84422	0.1487	0.205772	no
CAETHG_0547	CP006763:604898-605180	'ABRINI_FRU'	'ABRINI_RMG'	OK	16.049	31.8783	0.990088	2.60676	0.0417	0.0685477	no
CAETHG_0548	CP006763:605285-605663	'ABRINI_FRU'	'ABRINI_RMG'	OK	4.79139	7.88044	0.717833	1.36939	0.3652	0.441078	no
CAETHG_0549	CP006763:605838-607323	'ABRINI_FRU'	'ABRINI_RMG'	NOTEST	0	0	0	0	1	1	no
CAETHG_0550	CP006763:605838-607323	'ABRINI_FRU'	'ABRINI_RMG'	OK	7.94619	3.93309	-1.0146	-1.93787	0.05965	0.0937287	no
CAETHG_0551	CP006763:605838-607323	'ABRINI_FRU'	'ABRINI_RMG'	OK	4.67003	0.503326	-3.21387	-1.7145	0.1376	0.192479	no
CAETHG_0552	CP006763:607573-609472	'ABRINI_FRU'	'ABRINI_RMG'	OK	98.7756	54.3633	-0.861522	-2.21766	0.00105	0.00254597	yes
CAETHG_0553	CP006763:609710-610766	'ABRINI_FRU'	'ABRINI_RMG'	OK	8.84568	22.6713	1.35782	2.5155	5e-05	0.00015337	yes
CAETHG_0554	CP006763:611372-613298	'ABRINI_FRU'	'ABRINI_RMG'	OK	19.4906	12.6532	-0.62328	-1.51654	0.027	0.0468122	yes
CAETHG_0555	CP006763:613520-614687	'ABRINI_FRU'	'ABRINI_RMG'	OK	82.8408	337.444	2.02623	4.69623	5e-05	0.00015337	yes
CAETHG_0556	CP006763:614911-615127	'ABRINI_FRU'	'ABRINI_RMG'	OK	27.4312	33.8805	0.304637	1.01703	0.5654	0.634995	no
CAETHG_0557	CP006763:615161-617612	'ABRINI_FRU'	'ABRINI_RMG'	OK	10.8769	13.4802	0.309578	0.626823	0.25405	0.322991	no
CAETHG_0558	CP006763:617830-618097	'ABRINI_FRU'	'ABRINI_RMG'	OK	23.8129	6.6974	-1.83007	-4.39261	0.06115	0.09581	no
CAETHG_0559	CP006763:618226-619057	'ABRINI_FRU'	'ABRINI_RMG'	OK	6.77965	3.34922	-1.01738	-1.67632	0.0383	0.0636152	no
CAETHG_0560	CP006763:619253-620162	'ABRINI_FRU'	'ABRINI_RMG'	OK	70.8112	174.247	1.29908	3.77941	5e-05	0.00015337	yes
CAETHG_0561	CP006763:620705-621422	'ABRINI_FRU'	'ABRINI_RMG'	OK	131.039	94.281	-0.474953	-1.40957	0.0785	0.118603	no
CAETHG_0562	CP006763:621533-622025	'ABRINI_FRU'	'ABRINI_RMG'	OK	141.056	242.773	0.78334	2.39892	0.00305	0.00668714	yes
CAETHG_0563	CP006763:622030-622882	'ABRINI_FRU'	'ABRINI_RMG'	OK	63.1571	100.206	0.665948	1.82099	0.01335	0.0250673	yes
CAETHG_0564	CP006763:623399-624515	'ABRINI_FRU'	'ABRINI_RMG'	OK	83.8896	199.527	1.25002	2.70238	5e-05	0.00015337	yes
CAETHG_0565	CP006763:624593-625769	'ABRINI_FRU'	'ABRINI_RMG'	OK	6.22832	27.3133	2.13269	4.14884	5e-05	0.00015337	yes
CAETHG_0566	CP006763:625855-626968	'ABRINI_FRU'	'ABRINI_RMG'	OK	12.9335	33.8629	1.38859	2.94101	5e-05	0.00015337	yes
CAETHG_0567	CP006763:627293-628031	'ABRINI_FRU'	'ABRINI_RMG'	OK	76.1045	19.3572	-1.97511	-6.52308	5e-05	0.00015337	yes
CAETHG_0568	CP006763:628042-628858	'ABRINI_FRU'	'ABRINI_RMG'	OK	34.759	46.2181	0.411074	1.7261	0.1669	0.226718	no
CAETHG_0569	CP006763:628906-629698	'ABRINI_FRU'	'ABRINI_RMG'	OK	347.296	120.575	-1.52624	-3.9571	5e-05	0.00015337	yes
CAETHG_0570	CP006763:629795-630065	'ABRINI_FRU'	'ABRINI_RMG'	OK	25.5326	4.99321	-2.3543	-4.73793	0.02865	0.0493744	yes
CAETHG_0571	CP006763:630411-631440	'ABRINI_FRU'	'ABRINI_RMG'	OK	51.2138	37.4349	-0.452151	-1.53058	0.1096	0.158833	no
CAETHG_0572	CP006763:631658-632090	'ABRINI_FRU'	'ABRINI_RMG'	OK	258.338	1169.12	2.17809	6.81126	5e-05	0.00015337	yes
CAETHG_0573	CP006763:632118-632595	'ABRINI_FRU'	'ABRINI_RMG'	OK	196.287	647.856	1.72271	5.15324	5e-05	0.00015337	yes
CAETHG_0574	CP006763:632618-633107	'ABRINI_FRU'	'ABRINI_RMG'	OK	104.154	370.087	1.82915	5.16317	5e-05	0.00015337	yes
CAETHG_0575	CP006763:633178-633448	'ABRINI_FRU'	'ABRINI_RMG'	OK	566.958	158.107	-1.84234	-9.15002	5e-05	0.00015337	yes
CAETHG_0576	CP006763:633748-635683	'ABRINI_FRU'	'ABRINI_RMG'	OK	176.317	240.331	0.446849	1.02684	0.09455	0.139616	no
CAETHG_0577	CP006763:635798-638005	'ABRINI_FRU'	'ABRINI_RMG'	OK	76.1663	27.8841	-1.44971	-3.33263	5e-05	0.00015337	yes
CAETHG_0578	CP006763:635798-638005	'ABRINI_FRU'	'ABRINI_RMG'	OK	78.975	23.4742	-1.75032	-1.90161	0.002	0.00455209	yes
CAETHG_0579	CP006763:638466-639947	'ABRINI_FRU'	'ABRINI_RMG'	OK	108.36	449.423	2.05224	3.8976	5e-05	0.00015337	yes
CAETHG_0580	CP006763:638466-639947	'ABRINI_FRU'	'ABRINI_RMG'	OK	159.449	557.348	1.80549	2.67931	5e-05	0.00015337	yes
CAETHG_0581	CP006763:639949-640318	'ABRINI_FRU'	'ABRINI_RMG'	OK	229.101	430.558	0.910227	3.61405	0.001	0.002434	yes
CAETHG_0582	CP006763:640504-640957	'ABRINI_FRU'	'ABRINI_RMG'	OK	11.4794	0.267746	-5.42204	-2.26837	0.2251	0.29244	no
CAETHG_0583	CP006763:641138-641810	'ABRINI_FRU'	'ABRINI_RMG'	OK	20.5152	6.09306	-1.75145	-3.4928	0.0003	0.000809958	yes
CAETHG_0584	CP006763:641989-642364	'ABRINI_FRU'	'ABRINI_RMG'	OK	12.1692	24.9879	1.038	2.69306	0.03475	0.0585325	no
CAETHG_0585	CP006763:642375-643902	'ABRINI_FRU'	'ABRINI_RMG'	OK	13.0143	32.9384	1.33967	4.21843	5e-05	0.00015337	yes
CAETHG_0586	CP006763:643978-645076	'ABRINI_FRU'	'ABRINI_RMG'	OK	12.6908	14.5592	0.198144	0.43386	0.5232	0.596479	no
CAETHG_0587	CP006763:645201-646107	'ABRINI_FRU'	'ABRINI_RMG'	OK	5.82733	1.42145	-2.03547	-2.38612	0.00515	0.0107333	yes
CAETHG_0588	CP006763:646836-647973	'ABRINI_FRU'	'ABRINI_RMG'	OK	36.8917	22.634	-0.704801	-1.68205	0.0118	0.0224435	yes
CAETHG_0589	CP006763:648203-651410	'ABRINI_FRU'	'ABRINI_RMG'	OK	291.75	121.108	-1.26844	-2.41811	5e-05	0.00015337	yes
CAETHG_0590	CP006763:651453-652518	'ABRINI_FRU'	'ABRINI_RMG'	OK	313.047	242.374	-0.369142	-0.929123	0.15645	0.214812	no
CAETHG_0591	CP006763:652532-653534	'ABRINI_FRU'	'ABRINI_RMG'	OK	254.621	123.526	-1.04354	-2.54426	5e-05	0.00015337	yes
CAETHG_0592	CP006763:653825-654728	'ABRINI_FRU'	'ABRINI_RMG'	OK	83.262	86.0823	0.0480582	0.124673	0.85585	0.886217	no
CAETHG_0593	CP006763:654774-655398	'ABRINI_FRU'	'ABRINI_RMG'	OK	80.3448	33.2493	-1.27288	-3.23729	5e-05	0.00015337	yes
CAETHG_0594	CP006763:655449-656748	'ABRINI_FRU'	'ABRINI_RMG'	OK	60.2693	43.3882	-0.474121	-1.12222	0.07	0.107517	no
CAETHG_0595	CP006763:656777-657617	'ABRINI_FRU'	'ABRINI_RMG'	OK	46.3669	28.7686	-0.688602	-1.56005	0.0126	0.0238071	yes
CAETHG_0596	CP006763:657665-658124	'ABRINI_FRU'	'ABRINI_RMG'	OK	33.8274	11.5622	-1.54877	-3.99096	0.00085	0.00209829	yes
CAETHG_0597	CP006763:658209-658506	'ABRINI_FRU'	'ABRINI_RMG'	OK	32.0576	34.7279	0.115425	0.475892	0.80495	0.844027	no
CAETHG_0598	CP006763:658582-659098	'ABRINI_FRU'	'ABRINI_RMG'	OK	168.78	165.095	-0.0318489	-0.0926781	0.90175	0.923078	no
CAETHG_0599	CP006763:659223-659904	'ABRINI_FRU'	'ABRINI_RMG'	OK	6.74985	15.5494	1.20393	2.18382	0.0033	0.00717764	yes
CAETHG_0600	CP006763:660021-661347	'ABRINI_FRU'	'ABRINI_RMG'	OK	12.9226	36.6314	1.50318	3.60093	5e-05	0.00015337	yes
CAETHG_0601	CP006763:661797-664530	'ABRINI_FRU'	'ABRINI_RMG'	OK	0.829987	1.44421	0.799118	0.665891	0.2082	0.274056	no
CAETHG_0602	CP006763:661797-664530	'ABRINI_FRU'	'ABRINI_RMG'	OK	0.623527	3.65859	2.55276	1.84911	0.02225	0.0394108	yes
CAETHG_0603	CP006763:661797-664530	'ABRINI_FRU'	'ABRINI_RMG'	OK	0.6499	1.68302	1.37276	0.321416	0.5733	0.642289	no
CAETHG_0604	CP006763:664552-665587	'ABRINI_FRU'	'ABRINI_RMG'	OK	4.41193	31.955	2.85656	5.31659	5e-05	0.00015337	yes
CAETHG_0605	CP006763:665627-666806	'ABRINI_FRU'	'ABRINI_RMG'	NOTEST	0.170344	0.500715	1.55554	0	1	1	no
CAETHG_0606	CP006763:667247-668120	'ABRINI_FRU'	'ABRINI_RMG'	OK	3.29457	1.19676	-1.46096	-1.46581	0.03345	0.0566339	no
CAETHG_0607	CP006763:668767-671946	'ABRINI_FRU'	'ABRINI_RMG'	OK	5.57898	3.82504	-0.544528	-0.714317	0.26555	0.335492	no
CAETHG_0608	CP006763:668767-671946	'ABRINI_FRU'	'ABRINI_RMG'	OK	4.20146	2.67356	-0.652128	-0.642486	0.3681	0.444066	no
CAETHG_0609	CP006763:668767-671946	'ABRINI_FRU'	'ABRINI_RMG'	OK	3.26954	2.40074	-0.445606	-0.373443	0.56055	0.630413	no
CAETHG_0610	CP006763:668767-671946	'ABRINI_FRU'	'ABRINI_RMG'	OK	1.53349	0.313572	-2.28995	-0.584493	0.26755	0.337721	no
CAETHG_0611	CP006763:672610-673111	'ABRINI_FRU'	'ABRINI_RMG'	OK	83.8718	61.5333	-0.446819	-1.33074	0.1143	0.164852	no
CAETHG_0612	CP006763:673267-674170	'ABRINI_FRU'	'ABRINI_RMG'	OK	153.821	215.416	0.485877	1.63352	0.0627	0.0978909	no
CAETHG_0613	CP006763:674806-678096	'ABRINI_FRU'	'ABRINI_RMG'	OK	9.40282	64.0162	2.76727	5.04618	5e-05	0.00015337	yes
CAETHG_0614	CP006763:674806-678096	'ABRINI_FRU'	'ABRINI_RMG'	OK	6.23704	58.0406	3.21813	2.02053	0.0005	0.00129623	yes
CAETHG_0615	CP006763:678096-678765	'ABRINI_FRU'	'ABRINI_RMG'	OK	9.28395	78.8758	3.08677	6.56942	5e-05	0.00015337	yes
CAETHG_0616	CP006763:678816-680663	'ABRINI_FRU'	'ABRINI_RMG'	OK	11.1428	92.0841	3.04683	5.77069	5e-05	0.00015337	yes
CAETHG_0617	CP006763:678816-680663	'ABRINI_FRU'	'ABRINI_RMG'	OK	7.90787	52.5399	2.73205	2.795	5e-05	0.00015337	yes
CAETHG_0618	CP006763:680772-683331	'ABRINI_FRU'	'ABRINI_RMG'	OK	97.5937	152.134	0.640487	1.44902	0.01415	0.0263923	yes
CAETHG_0619	CP006763:683474-684305	'ABRINI_FRU'	'ABRINI_RMG'	OK	26.9232	18.9844	-0.504033	-1.38802	0.09915	0.145527	no
CAETHG_0620	CP006763:684481-684913	'ABRINI_FRU'	'ABRINI_RMG'	OK	3.09249	2.32535	-0.411316	-0.479671	0.664	0.723074	no
CAETHG_0621	CP006763:685104-685785	'ABRINI_FRU'	'ABRINI_RMG'	OK	19.6539	44.0958	1.16583	3.36919	0.0009	0.00221219	yes
CAETHG_0622	CP006763:685936-686185	'ABRINI_FRU'	'ABRINI_RMG'	OK	222.082	31.9726	-2.79618	-11.4708	5e-05	0.00015337	yes
CAETHG_0623	CP006763:686475-686670	'ABRINI_FRU'	'ABRINI_RMG'	OK	8041.74	47159.3	2.55196	24.6702	5e-05	0.00015337	yes
CAETHG_0624	CP006763:687367-687526	'ABRINI_FRU'	'ABRINI_RMG'	OK	33.4328	40.1387	0.263727	1.36449	0.7542	0.800844	no
CAETHG_0625	CP006763:687581-688259	'ABRINI_FRU'	'ABRINI_RMG'	OK	158.905	104.914	-0.598961	-2.7909	0.028	0.0483778	yes
CAETHG_0626	CP006763:688529-688664	'ABRINI_FRU'	'ABRINI_RMG'	NOTEST	1.19604	0	#NAME?	0	1	1	no
CAETHG_0627	CP006763:688721-689072	'ABRINI_FRU'	'ABRINI_RMG'	OK	8.25099	10.496	0.347195	0.67803	0.55975	0.629698	no
CAETHG_0628	CP006763:689142-690342	'ABRINI_FRU'	'ABRINI_RMG'	NOTEST	1.72738	0.1978	-3.12647	0	1	1	no
CAETHG_0629	CP006763:690551-690839	'ABRINI_FRU'	'ABRINI_RMG'	OK	142.926	81.3184	-0.81361	-4.24099	0.0127	0.0239724	yes
CAETHG_0630	CP006763:690941-692138	'ABRINI_FRU'	'ABRINI_RMG'	OK	55.2695	102.585	0.892269	2.07684	0.00075	0.0018728	yes
CAETHG_0631	CP006763:692140-692782	'ABRINI_FRU'	'ABRINI_RMG'	OK	38.5798	22.3249	-0.789193	-2.12294	0.01055	0.0202847	yes
CAETHG_0632	CP006763:693159-693288	'ABRINI_FRU'	'ABRINI_RMG'	OK	554.082	257.754	-1.1041	-17.8163	0.0136	0.0254659	yes
CAETHG_0633	CP006763:693464-693860	'ABRINI_FRU'	'ABRINI_RMG'	OK	12.1447	8.69551	-0.48198	-1.07928	0.39225	0.468763	no
CAETHG_0634	CP006763:693917-694286	'ABRINI_FRU'	'ABRINI_RMG'	NOTEST	2.3799	0.631356	-1.91437	0	1	1	no
CAETHG_0635	CP006763:694729-695644	'ABRINI_FRU'	'ABRINI_RMG'	OK	7.30773	2.52124	-1.53529	-2.30232	0.00635	0.0129151	yes
CAETHG_0636	CP006763:695865-697329	'ABRINI_FRU'	'ABRINI_RMG'	OK	22.5548	14.8813	-0.599937	-1.56496	0.037	0.061814	no
CAETHG_0637	CP006763:697350-698685	'ABRINI_FRU'	'ABRINI_RMG'	OK	13.2377	7.20929	-0.87672	-1.82274	0.0079	0.0156865	yes
CAETHG_0638	CP006763:698697-699471	'ABRINI_FRU'	'ABRINI_RMG'	NOTEST	1.02163	0.25524	-2.00094	0	1	1	no
CAETHG_0639	CP006763:699485-700307	'ABRINI_FRU'	'ABRINI_RMG'	NOTEST	1.37177	0.682682	-1.00675	0	1	1	no
CAETHG_0640	CP006763:700322-701060	'ABRINI_FRU'	'ABRINI_RMG'	NOTEST	0.858469	0.301411	-1.51003	0	1	1	no
CAETHG_0641	CP006763:701395-702079	'ABRINI_FRU'	'ABRINI_RMG'	OK	86.1585	70.3748	-0.291933	-0.802221	0.27145	0.342041	no
CAETHG_0642	CP006763:702362-702899	'ABRINI_FRU'	'ABRINI_RMG'	OK	15.9976	12.545	-0.350743	-0.886011	0.39065	0.46724	no
CAETHG_0643	CP006763:702933-703338	'ABRINI_FRU'	'ABRINI_RMG'	OK	98.8397	60.3536	-0.711651	-2.42193	0.0171	0.0312941	yes
CAETHG_0644	CP006763:703456-704146	'ABRINI_FRU'	'ABRINI_RMG'	OK	39.5826	62.9196	0.668642	1.86851	0.01955	0.0351716	yes
CAETHG_0645	CP006763:704198-705251	'ABRINI_FRU'	'ABRINI_RMG'	OK	65.7688	48.1806	-0.44895	-1.36473	0.09275	0.137258	no
CAETHG_0646	CP006763:705424-708140	'ABRINI_FRU'	'ABRINI_RMG'	OK	12.8686	8.53702	-0.592046	-0.992247	0.21855	0.285647	no
CAETHG_0647	CP006763:705424-708140	'ABRINI_FRU'	'ABRINI_RMG'	OK	7.24966	6.00528	-0.27168	-0.587338	0.5087	0.58302	no
CAETHG_0648	CP006763:708300-709251	'ABRINI_FRU'	'ABRINI_RMG'	OK	2.91705	2.70498	-0.108892	-0.135234	0.8287	0.864006	no
CAETHG_0649	CP006763:709359-710733	'ABRINI_FRU'	'ABRINI_RMG'	OK	3.23262	5.70713	0.820061	1.35208	0.0337	0.0569731	no
CAETHG_0650	CP006763:710898-711915	'ABRINI_FRU'	'ABRINI_RMG'	OK	2.33239	4.82397	1.04841	1.34626	0.02675	0.0463998	yes
CAETHG_0651	CP006763:712123-713098	'ABRINI_FRU'	'ABRINI_RMG'	OK	4.72384	10.8884	1.20476	2.04212	0.0023	0.00517635	yes
CAETHG_0652	CP006763:713101-713968	'ABRINI_FRU'	'ABRINI_RMG'	OK	8.52152	23.3353	1.45333	3.0597	5e-05	0.00015337	yes
CAETHG_0653	CP006763:714006-715050	'ABRINI_FRU'	'ABRINI_RMG'	OK	5.36744	12.6891	1.24129	2.26035	0.00155	0.00362204	yes
CAETHG_0654	CP006763:715069-715855	'ABRINI_FRU'	'ABRINI_RMG'	OK	4.87727	12.1914	1.32171	2.1981	0.00185	0.00424183	yes
CAETHG_0655	CP006763:715874-717326	'ABRINI_FRU'	'ABRINI_RMG'	OK	3.93036	10.3354	1.39486	2.5495	5e-05	0.00015337	yes
CAETHG_0656	CP006763:717713-719309	'ABRINI_FRU'	'ABRINI_RMG'	OK	99.6102	64.6166	-0.624389	-2.46141	0.01875	0.0339346	yes
CAETHG_0657	CP006763:719404-721167	'ABRINI_FRU'	'ABRINI_RMG'	OK	38.4784	36.6336	-0.0708815	-0.137129	0.8676	0.89628	no
CAETHG_0658	CP006763:719404-721167	'ABRINI_FRU'	'ABRINI_RMG'	OK	40.429	49.5542	0.293618	0.505304	0.4063	0.483387	no
CAETHG_0659	CP006763:721172-722279	'ABRINI_FRU'	'ABRINI_RMG'	OK	38.3289	53.6099	0.484068	1.13795	0.06575	0.102	no
CAETHG_0660	CP006763:722282-722813	'ABRINI_FRU'	'ABRINI_RMG'	OK	61.0598	47.8099	-0.352913	-0.962088	0.22475	0.292185	no
CAETHG_0661	CP006763:723021-723249	'ABRINI_FRU'	'ABRINI_RMG'	OK	24.7456	10.9588	-1.17508	-3.24777	0.12775	0.180751	no
CAETHG_0662	CP006763:723280-724108	'ABRINI_FRU'	'ABRINI_RMG'	OK	29.1118	7.60498	-1.93659	-4.25693	5e-05	0.00015337	yes
CAETHG_0663	CP006763:724376-725054	'ABRINI_FRU'	'ABRINI_RMG'	OK	31.927	52.2679	0.711149	2.35572	0.0179	0.0325658	yes
CAETHG_0664	CP006763:725274-725829	'ABRINI_FRU'	'ABRINI_RMG'	OK	47.1043	61.6444	0.388111	0.976202	0.1678	0.227778	no
CAETHG_0665	CP006763:726041-726719	'ABRINI_FRU'	'ABRINI_RMG'	OK	24.9637	19.4807	-0.357785	-0.746498	0.2366	0.304587	no
CAETHG_0666	CP006763:726760-727672	'ABRINI_FRU'	'ABRINI_RMG'	OK	9.95562	6.65457	-0.581166	-0.948841	0.09955	0.146002	no
CAETHG_0667	CP006763:727686-730041	'ABRINI_FRU'	'ABRINI_RMG'	OK	5.34478	6.81515	0.350615	0.66648	0.24855	0.317017	no
CAETHG_0668	CP006763:730661-730982	'ABRINI_FRU'	'ABRINI_RMG'	OK	6.03406	12.3385	1.03197	1.90558	0.135	0.189327	no
CAETHG_0669	CP006763:731006-731243	'ABRINI_FRU'	'ABRINI_RMG'	OK	4.49362	5.47732	0.285593	0.413594	0.8129	0.851041	no
CAETHG_0670	CP006763:731274-731976	'ABRINI_FRU'	'ABRINI_RMG'	OK	3.23558	7.83965	1.27677	1.79633	0.01215	0.0230442	yes
CAETHG_0671	CP006763:732190-733069	'ABRINI_FRU'	'ABRINI_RMG'	OK	8.78749	21.438	1.28665	2.67467	0.0001	0.00029355	yes
CAETHG_0672	CP006763:733268-738539	'ABRINI_FRU'	'ABRINI_RMG'	OK	1.70427	2.50503	0.555672	0.8434	0.0693	0.106585	no
CAETHG_0673	CP006763:739567-740545	'ABRINI_FRU'	'ABRINI_RMG'	NOTEST	1.04624	0.431379	-1.27819	0	1	1	no
CAETHG_0674	CP006763:740616-740937	'ABRINI_FRU'	'ABRINI_RMG'	OK	12.9923	5.21458	-1.31704	-2.00644	0.0656	0.101795	no
CAETHG_0675	CP006763:740973-742074	'ABRINI_FRU'	'ABRINI_RMG'	OK	3.37389	1.23698	-1.44758	-1.58192	0.0195	0.0351092	yes
CAETHG_0676	CP006763:742105-742543	'ABRINI_FRU'	'ABRINI_RMG'	OK	3.34098	0.282155	-3.56571	-1.48173	0.2258	0.293085	no
CAETHG_0677	CP006763:742723-743488	'ABRINI_FRU'	'ABRINI_RMG'	OK	278.064	149.958	-0.890863	-2.55072	0.0006	0.00153329	yes
CAETHG_0678	CP006763:743624-745337	'ABRINI_FRU'	'ABRINI_RMG'	OK	19.6105	8.29457	-1.24139	-2.68842	0.0001	0.00029355	yes
CAETHG_0679	CP006763:745500-745995	'ABRINI_FRU'	'ABRINI_RMG'	OK	7.99333	2.40798	-1.73097	-2.21289	0.0306	0.0523652	no
CAETHG_0680	CP006763:746135-747440	'ABRINI_FRU'	'ABRINI_RMG'	OK	76.2054	352.114	2.20808	5.24163	5e-05	0.00015337	yes
CAETHG_0681	CP006763:747471-749238	'ABRINI_FRU'	'ABRINI_RMG'	OK	5.80489	3.86587	-0.586476	-1.10021	0.09235	0.136701	no
CAETHG_0682	CP006763:749271-750330	'ABRINI_FRU'	'ABRINI_RMG'	OK	44.3064	82.9447	0.904637	2.14	0.00095	0.00232215	yes
CAETHG_0683	CP006763:750333-751395	'ABRINI_FRU'	'ABRINI_RMG'	OK	7.12005	8.19424	0.202723	0.407857	0.56435	0.634127	no
CAETHG_0684	CP006763:751411-752194	'ABRINI_FRU'	'ABRINI_RMG'	OK	5.84749	9.20595	0.654747	1.39819	0.1389	0.194037	no
CAETHG_0685	CP006763:752195-753023	'ABRINI_FRU'	'ABRINI_RMG'	OK	4.81718	3.8165	-0.33594	-0.571578	0.5062	0.580734	no
CAETHG_0686	CP006763:753312-754350	'ABRINI_FRU'	'ABRINI_RMG'	OK	46.2136	41.3199	-0.16148	-0.418475	0.54925	0.620564	no
CAETHG_0687	CP006763:754552-755530	'ABRINI_FRU'	'ABRINI_RMG'	OK	89.9582	62.7348	-0.519989	-1.4676	0.0496	0.0797396	no
CAETHG_0688	CP006763:755539-755944	'ABRINI_FRU'	'ABRINI_RMG'	OK	87.5246	147.49	0.75286	3.53837	0.0095	0.0184827	yes
CAETHG_0689	CP006763:755958-756675	'ABRINI_FRU'	'ABRINI_RMG'	OK	67.0613	110.734	0.72354	2.57527	0.009	0.0176115	yes
CAETHG_0690	CP006763:756691-757570	'ABRINI_FRU'	'ABRINI_RMG'	OK	89.6222	204.909	1.19306	3.5796	5e-05	0.00015337	yes
CAETHG_0691	CP006763:757647-759366	'ABRINI_FRU'	'ABRINI_RMG'	OK	81.9523	76.2474	-0.104096	-0.351612	0.68685	0.744001	no
CAETHG_0692	CP006763:759383-760721	'ABRINI_FRU'	'ABRINI_RMG'	OK	121.201	77.9275	-0.637194	-1.68019	0.01395	0.0260617	yes
CAETHG_0693	CP006763:760786-760897	'ABRINI_FRU'	'ABRINI_RMG'	OK	3744.59	15154.3	2.01685	116.693	5e-05	0.00015337	yes
CAETHG_0694	CP006763:761332-761494	'ABRINI_FRU'	'ABRINI_RMG'	OK	94.8573	257.851	1.44271	12.3533	0.00355	0.00766616	yes
CAETHG_0695	CP006763:761696-762224	'ABRINI_FRU'	'ABRINI_RMG'	OK	86.6402	44.4104	-0.964138	-2.56498	0.0005	0.00129623	yes
CAETHG_0696	CP006763:762261-763017	'ABRINI_FRU'	'ABRINI_RMG'	OK	19.2013	16.827	-0.190431	-0.385708	0.5463	0.618023	no
CAETHG_0697	CP006763:763123-764369	'ABRINI_FRU'	'ABRINI_RMG'	OK	17.4231	15.1483	-0.201842	-0.362467	0.73185	0.782838	no
CAETHG_0698	CP006763:763123-764369	'ABRINI_FRU'	'ABRINI_RMG'	OK	22.9494	4.45165	-2.36605	-3.02198	0.00015	0.000427948	yes
CAETHG_0699	CP006763:764514-769208	'ABRINI_FRU'	'ABRINI_RMG'	OK	6.16688	2.68959	-1.19715	-0.499924	0.42445	0.501599	no
CAETHG_0700	CP006763:764514-769208	'ABRINI_FRU'	'ABRINI_RMG'	OK	23.2583	19.2441	-0.273327	-0.302989	0.6387	0.700499	no
CAETHG_0701	CP006763:764514-769208	'ABRINI_FRU'	'ABRINI_RMG'	OK	7.3154	15.5242	1.08551	0.493385	0.7624	0.807735	no
CAETHG_0702	CP006763:764514-769208	'ABRINI_FRU'	'ABRINI_RMG'	OK	136.799	189.213	0.46795	0.904297	0.1084	0.157233	no
CAETHG_0703	CP006763:769416-769554	'ABRINI_FRU'	'ABRINI_RMG'	NOTEST	8.97055	0	#NAME?	0	1	1	no
CAETHG_0704	CP006763:769615-769774	'ABRINI_FRU'	'ABRINI_RMG'	OK	85.3173	27.5188	-1.63242	-8.63455	0.05355	0.0852178	no
CAETHG_0706	CP006763:770061-770832	'ABRINI_FRU'	'ABRINI_RMG'	OK	11.125	14.5449	0.386708	0.753856	0.24345	0.311587	no
CAETHG_0707	CP006763:770850-772646	'ABRINI_FRU'	'ABRINI_RMG'	OK	3.73573	3.28586	-0.185119	-0.221229	0.75955	0.805332	no
CAETHG_0708	CP006763:770850-772646	'ABRINI_FRU'	'ABRINI_RMG'	OK	5.1194	5.2267	0.0299264	0.032672	0.9558	0.965991	no
CAETHG_0709	CP006763:772663-774609	'ABRINI_FRU'	'ABRINI_RMG'	OK	2.11205	1.17861	-0.841553	-0.471811	0.52215	0.595578	no
CAETHG_0710	CP006763:772663-774609	'ABRINI_FRU'	'ABRINI_RMG'	OK	4.98694	6.82985	0.4537	0.565479	0.2389	0.306997	no
CAETHG_0711	CP006763:774637-775435	'ABRINI_FRU'	'ABRINI_RMG'	OK	2.77805	2.70014	-0.041036	-0.0526845	0.94835	0.960255	no
CAETHG_0712	CP006763:775640-776354	'ABRINI_FRU'	'ABRINI_RMG'	OK	124.966	21.1539	-2.56254	-5.72063	5e-05	0.00015337	yes
CAETHG_0713	CP006763:776421-777362	'ABRINI_FRU'	'ABRINI_RMG'	OK	8.11066	0.938134	-3.11195	-1.56681	0.2496	0.31818	no
CAETHG_0714	CP006763:776421-777362	'ABRINI_FRU'	'ABRINI_RMG'	OK	1.67044	0	#NAME?	#NAME?	0.12405	0.176539	no
CAETHG_0715	CP006763:777491-778034	'ABRINI_FRU'	'ABRINI_RMG'	OK	18.1503	2.71391	-2.74155	-5.93428	0.01925	0.0347136	yes
CAETHG_0716	CP006763:778094-778742	'ABRINI_FRU'	'ABRINI_RMG'	OK	30.7577	40.4474	0.3951	1.05269	0.18005	0.242001	no
CAETHG_0717	CP006763:779055-779355	'ABRINI_FRU'	'ABRINI_RMG'	OK	30.234	18.2237	-0.730354	-1.94654	0.1057	0.153803	no
CAETHG_0718	CP006763:779418-780729	'ABRINI_FRU'	'ABRINI_RMG'	OK	10.9401	7.34311	-0.575164	-1.17143	0.0723	0.110546	no
CAETHG_0719	CP006763:780739-781210	'ABRINI_FRU'	'ABRINI_RMG'	OK	3.5301	1.31039	-1.42971	-1.47699	0.18525	0.247886	no
CAETHG_0720	CP006763:781383-781848	'ABRINI_FRU'	'ABRINI_RMG'	OK	142.76	39.8886	-1.83955	-4.76345	5e-05	0.00015337	yes
CAETHG_0721	CP006763:781981-782617	'ABRINI_FRU'	'ABRINI_RMG'	OK	18.3402	1.43394	-3.67695	-4.65186	0.00335	0.00727673	yes
CAETHG_0722	CP006763:782653-783247	'ABRINI_FRU'	'ABRINI_RMG'	OK	47.4365	2.26833	-4.38629	-6.99165	0.00035	0.000934175	yes
CAETHG_0723	CP006763:783466-785274	'ABRINI_FRU'	'ABRINI_RMG'	OK	4.36203	4.38189	0.00655205	0.00713675	0.9806	0.984376	no
CAETHG_0724	CP006763:783466-785274	'ABRINI_FRU'	'ABRINI_RMG'	OK	5.90864	15.2846	1.37118	2.59949	0.0004	0.001059	yes
CAETHG_0725	CP006763:785310-785760	'ABRINI_FRU'	'ABRINI_RMG'	OK	7.88777	45.6919	2.53425	5.51213	5e-05	0.00015337	yes
CAETHG_0726	CP006763:785828-786263	'ABRINI_FRU'	'ABRINI_RMG'	OK	8.55319	7.71229	-0.149305	-0.259943	0.78805	0.830025	no
CAETHG_0727	CP006763:786294-786837	'ABRINI_FRU'	'ABRINI_RMG'	OK	27.0103	4.79479	-2.49397	-4.64786	5e-05	0.00015337	yes
CAETHG_0728	CP006763:786894-787971	'ABRINI_FRU'	'ABRINI_RMG'	OK	10.2519	2.58394	-1.98824	-3.81523	0.0005	0.00129623	yes
CAETHG_0729	CP006763:788499-789411	'ABRINI_FRU'	'ABRINI_RMG'	OK	32.3147	5.13099	-2.65488	-6.26473	5e-05	0.00015337	yes
CAETHG_0730	CP006763:790005-791437	'ABRINI_FRU'	'ABRINI_RMG'	OK	30.1661	57.2273	0.923775	1.42687	0.1336	0.187639	no
CAETHG_0731	CP006763:790005-791437	'ABRINI_FRU'	'ABRINI_RMG'	OK	46.4276	144.581	1.63883	3.11504	5e-05	0.00015337	yes
CAETHG_0732	CP006763:791502-792117	'ABRINI_FRU'	'ABRINI_RMG'	OK	288.262	1225.9	2.08838	5.94988	5e-05	0.00015337	yes
CAETHG_0733	CP006763:792164-793878	'ABRINI_FRU'	'ABRINI_RMG'	OK	65.0026	45.8678	-0.503016	-0.660515	0.44	0.516939	no
CAETHG_0734	CP006763:792164-793878	'ABRINI_FRU'	'ABRINI_RMG'	OK	154.622	155.489	0.00806457	0.0158849	0.97715	0.981565	no
CAETHG_0735	CP006763:794450-795512	'ABRINI_FRU'	'ABRINI_RMG'	OK	128.88	116.552	-0.145057	-0.379144	0.5746	0.643249	no
CAETHG_0736	CP006763:795532-796693	'ABRINI_FRU'	'ABRINI_RMG'	OK	46.8654	51.6411	0.139998	0.347097	0.6025	0.668286	no
CAETHG_0737	CP006763:796696-797764	'ABRINI_FRU'	'ABRINI_RMG'	OK	50.7427	44.3428	-0.194503	-0.566458	0.48495	0.560618	no
CAETHG_0738	CP006763:797813-798905	'ABRINI_FRU'	'ABRINI_RMG'	OK	181.661	51.9742	-1.80538	-4.04499	5e-05	0.00015337	yes
CAETHG_0739	CP006763:799024-799720	'ABRINI_FRU'	'ABRINI_RMG'	OK	60.6915	24.5188	-1.30761	-3.09237	5e-05	0.00015337	yes
CAETHG_0740	CP006763:799752-801565	'ABRINI_FRU'	'ABRINI_RMG'	OK	46.8195	19.4403	-1.26806	-2.09329	0.0025	0.005587	yes
CAETHG_0741	CP006763:799752-801565	'ABRINI_FRU'	'ABRINI_RMG'	OK	64.4902	40.8682	-0.658101	-1.10971	0.07265	0.110934	no
CAETHG_0742	CP006763:801639-802230	'ABRINI_FRU'	'ABRINI_RMG'	OK	27.3799	20.1982	-0.438893	-1.24704	0.1871	0.249779	no
CAETHG_0743	CP006763:802331-803780	'ABRINI_FRU'	'ABRINI_RMG'	OK	20.9286	22.4267	0.0997467	0.25028	0.7219	0.774072	no
CAETHG_0744	CP006763:803930-805100	'ABRINI_FRU'	'ABRINI_RMG'	OK	159.982	149.925	-0.0936662	-0.256966	0.70615	0.761097	no
CAETHG_0745	CP006763:805198-806110	'ABRINI_FRU'	'ABRINI_RMG'	OK	14.3594	13.0849	-0.134086	-0.278145	0.66845	0.727644	no
CAETHG_0746	CP006763:806371-806593	'ABRINI_FRU'	'ABRINI_RMG'	OK	1673.96	4807.15	1.52192	15.5505	5e-05	0.00015337	yes
CAETHG_0747	CP006763:806754-807744	'ABRINI_FRU'	'ABRINI_RMG'	OK	86.1017	30.8222	-1.48207	-3.71214	5e-05	0.00015337	yes
CAETHG_0748	CP006763:807815-808982	'ABRINI_FRU'	'ABRINI_RMG'	OK	84.5844	35.3166	-1.26005	-2.74374	5e-05	0.00015337	yes
CAETHG_0749	CP006763:809080-809785	'ABRINI_FRU'	'ABRINI_RMG'	OK	971.723	2041.77	1.0712	2.44471	0.00045	0.00117913	yes
CAETHG_0750	CP006763:810495-811323	'ABRINI_FRU'	'ABRINI_RMG'	OK	126.449	253.089	1.00109	2.97634	0.0001	0.00029355	yes
CAETHG_0751	CP006763:811363-812743	'ABRINI_FRU'	'ABRINI_RMG'	OK	142.456	166.334	0.22357	0.624326	0.3739	0.450069	no
CAETHG_0752	CP006763:812878-813697	'ABRINI_FRU'	'ABRINI_RMG'	OK	58.2024	56.1934	-0.0506764	-0.138961	0.85235	0.883151	no
CAETHG_0753	CP006763:814107-815949	'ABRINI_FRU'	'ABRINI_RMG'	OK	767.815	810.882	0.0787326	0.14498	0.80575	0.844789	no
CAETHG_0754	CP006763:816245-817103	'ABRINI_FRU'	'ABRINI_RMG'	OK	846.794	675.517	-0.326019	-0.892925	0.22495	0.292379	no
CAETHG_0755	CP006763:817426-819088	'ABRINI_FRU'	'ABRINI_RMG'	OK	265.398	240.967	-0.139321	-0.302397	0.59705	0.663524	no
CAETHG_0756	CP006763:819226-819868	'ABRINI_FRU'	'ABRINI_RMG'	OK	183.662	73.3676	-1.32384	-4.10494	5e-05	0.00015337	yes
CAETHG_0757	CP006763:819899-820145	'ABRINI_FRU'	'ABRINI_RMG'	OK	124.128	22.0927	-2.4902	-9.88796	0.0001	0.00029355	yes
CAETHG_0758	CP006763:820345-821545	'ABRINI_FRU'	'ABRINI_RMG'	OK	51.2946	18.5625	-1.46641	-3.96124	5e-05	0.00015337	yes
CAETHG_0759	CP006763:821615-822794	'ABRINI_FRU'	'ABRINI_RMG'	OK	68.8294	43.4481	-0.66373	-1.49059	0.0116	0.0221034	yes
CAETHG_0760	CP006763:822814-823936	'ABRINI_FRU'	'ABRINI_RMG'	OK	147.87	104.911	-0.495163	-1.20074	0.0521	0.0832221	no
CAETHG_0761	CP006763:824024-824720	'ABRINI_FRU'	'ABRINI_RMG'	OK	75.0005	40.8115	-0.877923	-2.3744	0.0017	0.00393011	yes
CAETHG_0762	CP006763:824786-826005	'ABRINI_FRU'	'ABRINI_RMG'	OK	33.6192	14.4317	-1.22004	-2.74037	5e-05	0.00015337	yes
CAETHG_0763	CP006763:824786-826005	'ABRINI_FRU'	'ABRINI_RMG'	OK	56.0608	0	#NAME?	#NAME?	0.23705	0.305029	no
CAETHG_0764	CP006763:826126-827246	'ABRINI_FRU'	'ABRINI_RMG'	OK	32.4628	9.30659	-1.80246	-3.58891	0.0001	0.00029355	yes
CAETHG_0766	CP006763:826126-827246	'ABRINI_FRU'	'ABRINI_RMG'	OK	66.0083	37.6221	-0.811065	-1.27002	0.1363	0.190917	no
CAETHG_0767	CP006763:827556-828156	'ABRINI_FRU'	'ABRINI_RMG'	OK	360.476	318.343	-0.179322	-0.57063	0.4762	0.552675	no
CAETHG_0768	CP006763:828199-828697	'ABRINI_FRU'	'ABRINI_RMG'	OK	72.0522	68.9569	-0.0633472	-0.213649	0.8235	0.859783	no
CAETHG_0769	CP006763:828802-830522	'ABRINI_FRU'	'ABRINI_RMG'	OK	12.2271	9.20422	-0.409719	-0.604495	0.52275	0.596144	no
CAETHG_0770	CP006763:828802-830522	'ABRINI_FRU'	'ABRINI_RMG'	OK	10.2747	8.17838	-0.329202	-0.456339	0.5578	0.628121	no
CAETHG_0771	CP006763:828802-830522	'ABRINI_FRU'	'ABRINI_RMG'	OK	182.477	72.4166	-1.33332	-1.79587	0.00325	0.0070756	yes
CAETHG_0772	CP006763:830638-831142	'ABRINI_FRU'	'ABRINI_RMG'	NOTEST	1.57578	0	#NAME?	0	1	1	no
CAETHG_0773	CP006763:831370-831976	'ABRINI_FRU'	'ABRINI_RMG'	OK	120.85	58.3826	-1.04961	-3.68617	0.0003	0.000809958	yes
CAETHG_0774	CP006763:832107-833028	'ABRINI_FRU'	'ABRINI_RMG'	OK	9.86083	5.84782	-0.753811	-1.26337	0.03535	0.0593774	no
CAETHG_0775	CP006763:833028-833760	'ABRINI_FRU'	'ABRINI_RMG'	OK	5.15725	5.70844	0.146494	0.207829	0.7301	0.781549	no
CAETHG_0776	CP006763:833888-834901	'ABRINI_FRU'	'ABRINI_RMG'	OK	2.07959	0	#NAME?	#NAME?	0.1146	0.165264	no
CAETHG_0777	CP006763:833888-834901	'ABRINI_FRU'	'ABRINI_RMG'	OK	2.43256	3.46188	0.509085	0.413828	0.55805	0.62834	no
CAETHG_0778	CP006763:835094-835433	'ABRINI_FRU'	'ABRINI_RMG'	OK	75.5237	4.09153	-4.20622	-6.51144	5e-05	0.00015337	yes
CAETHG_0779	CP006763:835770-836820	'ABRINI_FRU'	'ABRINI_RMG'	OK	85.5678	31.3111	-1.4504	-3.54317	5e-05	0.00015337	yes
CAETHG_0780	CP006763:837132-838263	'ABRINI_FRU'	'ABRINI_RMG'	OK	176.67	472.168	1.41824	3.20288	5e-05	0.00015337	yes
CAETHG_0781	CP006763:838399-838615	'ABRINI_FRU'	'ABRINI_RMG'	OK	15.3611	10.453	-0.555365	-1.25283	0.47465	0.551323	no
CAETHG_0782	CP006763:838811-839774	'ABRINI_FRU'	'ABRINI_RMG'	OK	33.4189	11.9013	-1.48954	-3.48835	5e-05	0.00015337	yes
CAETHG_0783	CP006763:839956-840181	'ABRINI_FRU'	'ABRINI_RMG'	NOTEST	0.384578	0	#NAME?	0	1	1	no
CAETHG_0784	CP006763:840187-840400	'ABRINI_FRU'	'ABRINI_RMG'	NOTEST	0.463224	0	#NAME?	0	1	1	no
CAETHG_0785	CP006763:840946-841495	'ABRINI_FRU'	'ABRINI_RMG'	OK	186.396	148.291	-0.329947	-1.13015	0.2247	0.292153	no
CAETHG_0786	CP006763:841838-843221	'ABRINI_FRU'	'ABRINI_RMG'	OK	154.558	271.269	0.811575	1.89715	0.0028	0.00617918	yes
CAETHG_0787	CP006763:843465-845557	'ABRINI_FRU'	'ABRINI_RMG'	OK	18.8197	11.351	-0.729426	-1.6016	0.03095	0.0528537	no
CAETHG_0788	CP006763:843465-845557	'ABRINI_FRU'	'ABRINI_RMG'	OK	20.3009	5.00253	-2.02081	-1.86528	0.0153	0.0282706	yes
CAETHG_0789	CP006763:845615-847697	'ABRINI_FRU'	'ABRINI_RMG'	OK	2.86707	1.13052	-1.34259	-1.3067	0.1444	0.200694	no
CAETHG_0790	CP006763:845615-847697	'ABRINI_FRU'	'ABRINI_RMG'	NOTEST	2.37257	0	#NAME?	0	1	1	no
CAETHG_0791	CP006763:845615-847697	'ABRINI_FRU'	'ABRINI_RMG'	NOTEST	0.556152	0.448743	-0.309588	0	1	1	no
CAETHG_0792	CP006763:847999-848803	'ABRINI_FRU'	'ABRINI_RMG'	OK	25.0881	11.6103	-1.11159	-2.68198	0.00175	0.00402865	yes
CAETHG_0793	CP006763:849089-849254	'ABRINI_FRU'	'ABRINI_RMG'	NOTEST	0.533502	0	#NAME?	0	1	1	no
CAETHG_0794	CP006763:849330-851214	'ABRINI_FRU'	'ABRINI_RMG'	OK	16.9432	11.7292	-0.530599	-1.40246	0.0645	0.100346	no
CAETHG_0795	CP006763:851374-852040	'ABRINI_FRU'	'ABRINI_RMG'	OK	43.9579	23.6654	-0.893344	-2.25211	0.00335	0.00727673	yes
CAETHG_0796	CP006763:852307-853669	'ABRINI_FRU'	'ABRINI_RMG'	NOTEST	1.07592	1.18308	0.13698	0	1	1	no
CAETHG_0797	CP006763:853753-854191	'ABRINI_FRU'	'ABRINI_RMG'	OK	34.2541	14.7188	-1.21862	-3.09771	0.0028	0.00617918	yes
CAETHG_0798	CP006763:854264-854564	'ABRINI_FRU'	'ABRINI_RMG'	NOTEST	0	0	0	0	1	1	no
CAETHG_0799	CP006763:855084-855963	'ABRINI_FRU'	'ABRINI_RMG'	NOTEST	0.275878	0	#NAME?	0	1	1	no
CAETHG_0800	CP006763:855963-858198	'ABRINI_FRU'	'ABRINI_RMG'	NOTEST	0.957861	1.03019	0.105022	0	1	1	no
CAETHG_0801	CP006763:858204-858939	'ABRINI_FRU'	'ABRINI_RMG'	NOTEST	0.0801029	0.58381	2.86557	0	1	1	no
CAETHG_0802	CP006763:859040-860893	'ABRINI_FRU'	'ABRINI_RMG'	OK	261.43	286.568	0.132453	0.388615	0.8395	0.872596	no
CAETHG_0803	CP006763:859040-860893	'ABRINI_FRU'	'ABRINI_RMG'	OK	34.7575	58.3654	0.74779	1.31148	0.009	0.0176115	yes
CAETHG_0804	CP006763:860975-864244	'ABRINI_FRU'	'ABRINI_RMG'	OK	31.7397	58.2852	0.876844	0.851396	0.20235	0.267645	no
CAETHG_0805	CP006763:860975-864244	'ABRINI_FRU'	'ABRINI_RMG'	OK	39.9144	82.7402	1.05168	2.05276	5e-05	0.00015337	yes
CAETHG_0806	CP006763:864617-865061	'ABRINI_FRU'	'ABRINI_RMG'	OK	6.35794	4.72503	-0.428236	-0.655673	0.49785	0.572875	no
CAETHG_0807	CP006763:865469-865724	'ABRINI_FRU'	'ABRINI_RMG'	OK	5.39432	4.9484	-0.124479	-0.184274	0.91305	0.93215	no
CAETHG_0808	CP006763:866403-867306	'ABRINI_FRU'	'ABRINI_RMG'	OK	44.6587	71.3149	0.675264	1.66007	0.01175	0.0223632	yes
CAETHG_0809	CP006763:868172-868265	'ABRINI_FRU'	'ABRINI_RMG'	NOTEST	0	0	0	0	1	1	no
CAETHG_0810	CP006763:868519-868924	'ABRINI_FRU'	'ABRINI_RMG'	OK	70.3626	26.4537	-1.41134	-3.89549	5e-05	0.00015337	yes
CAETHG_0811	CP006763:869053-869629	'ABRINI_FRU'	'ABRINI_RMG'	OK	29.7153	7.65211	-1.95728	-3.53004	5e-05	0.00015337	yes
CAETHG_0812	CP006763:869853-871557	'ABRINI_FRU'	'ABRINI_RMG'	OK	477.979	2373.87	2.31222	3.67565	5e-05	0.00015337	yes
CAETHG_0813	CP006763:871675-872782	'ABRINI_FRU'	'ABRINI_RMG'	OK	24.37	11.358	-1.10139	-2.51558	0.00035	0.000934175	yes
CAETHG_0814	CP006763:873532-874333	'ABRINI_FRU'	'ABRINI_RMG'	NOTEST	0	0	0	0	1	1	no
CAETHG_0815	CP006763:874374-874953	'ABRINI_FRU'	'ABRINI_RMG'	NOTEST	0	0	0	0	1	1	no
CAETHG_0816	CP006763:875032-876358	'ABRINI_FRU'	'ABRINI_RMG'	OK	2305.82	1829.46	-0.333862	-0.551377	0.3709	0.446974	no
CAETHG_0817	CP006763:876776-878123	'ABRINI_FRU'	'ABRINI_RMG'	OK	586.827	127.083	-2.20716	-4.6354	5e-05	0.00015337	yes
CAETHG_0818	CP006763:878353-878803	'ABRINI_FRU'	'ABRINI_RMG'	OK	243.14	35.4761	-2.77686	-9.12524	5e-05	0.00015337	yes
CAETHG_0819	CP006763:878983-880432	'ABRINI_FRU'	'ABRINI_RMG'	OK	52.8776	15.1584	-1.80254	-4.33849	5e-05	0.00015337	yes
CAETHG_0820	CP006763:880491-881364	'ABRINI_FRU'	'ABRINI_RMG'	OK	1997.69	737.75	-1.43713	-2.69019	5e-05	0.00015337	yes
CAETHG_0821	CP006763:881471-883557	'ABRINI_FRU'	'ABRINI_RMG'	OK	986.565	329.241	-1.58327	-2.98765	5e-05	0.00015337	yes
CAETHG_0822	CP006763:881471-883557	'ABRINI_FRU'	'ABRINI_RMG'	OK	348.989	78.8288	-2.14639	-2.28197	0.00175	0.00402865	yes
CAETHG_0823	CP006763:883804-884701	'ABRINI_FRU'	'ABRINI_RMG'	OK	1089.96	242.27	-2.16959	-5.66108	5e-05	0.00015337	yes
CAETHG_0824	CP006763:890291-890465	'ABRINI_FRU'	'ABRINI_RMG'	NOTEST	4.12058	0	#NAME?	0	1	1	no
CAETHG_0825	CP006763:890668-891694	'ABRINI_FRU'	'ABRINI_RMG'	OK	119.36	30.6319	-1.96222	-5.63736	5e-05	0.00015337	yes
CAETHG_0826	CP006763:891966-892710	'ABRINI_FRU'	'ABRINI_RMG'	OK	184.874	174.835	-0.0805475	-0.256621	0.75545	0.801652	no
CAETHG_0827	CP006763:892732-894574	'ABRINI_FRU'	'ABRINI_RMG'	OK	112.073	122.432	0.127541	0.320426	0.61395	0.678885	no
CAETHG_0828	CP006763:894577-894961	'ABRINI_FRU'	'ABRINI_RMG'	OK	83.1994	141.511	0.766273	3.65137	0.0109	0.0208911	yes
CAETHG_0829	CP006763:894969-895515	'ABRINI_FRU'	'ABRINI_RMG'	OK	141.523	172.598	0.286381	0.962355	0.28235	0.353716	no
CAETHG_0830	CP006763:895737-896910	'ABRINI_FRU'	'ABRINI_RMG'	OK	30.538	25.8858	-0.238441	-0.511954	0.3873	0.463668	no
CAETHG_0831	CP006763:897045-897387	'ABRINI_FRU'	'ABRINI_RMG'	OK	718.344	426.638	-0.751662	-3.08335	0.0042	0.00891373	yes
CAETHG_0832	CP006763:897437-899713	'ABRINI_FRU'	'ABRINI_RMG'	OK	52.6482	34.5607	-0.607252	-1.08219	0.0797	0.120005	no
CAETHG_0833	CP006763:897437-899713	'ABRINI_FRU'	'ABRINI_RMG'	OK	42.9715	21.4607	-1.00168	-1.27595	0.0158	0.0290961	yes
CAETHG_0834	CP006763:900042-900762	'ABRINI_FRU'	'ABRINI_RMG'	OK	8.67985	2.01964	-2.10357	-2.917	0.0037	0.00795861	yes
CAETHG_0835	CP006763:900801-901512	'ABRINI_FRU'	'ABRINI_RMG'	OK	26.4439	14.3547	-0.881409	-2.25344	0.00795	0.0157748	yes
CAETHG_0836	CP006763:901583-902003	'ABRINI_FRU'	'ABRINI_RMG'	OK	23.3706	8.05585	-1.53658	-3.25347	0.00395	0.00844252	yes
CAETHG_0837	CP006763:902068-902296	'ABRINI_FRU'	'ABRINI_RMG'	OK	14.6869	4.78233	-1.61874	-2.90578	0.13845	0.193526	no
CAETHG_0838	CP006763:902554-906762	'ABRINI_FRU'	'ABRINI_RMG'	OK	27.8449	9.59835	-1.53655	-2.58272	5e-05	0.00015337	yes
CAETHG_0839	CP006763:902554-906762	'ABRINI_FRU'	'ABRINI_RMG'	OK	23.3938	12.078	-0.953743	-1.58016	0.01815	0.0329788	yes
CAETHG_0840	CP006763:906847-908032	'ABRINI_FRU'	'ABRINI_RMG'	OK	172.012	85.6044	-1.00675	-2.38999	0.00015	0.000427948	yes
CAETHG_0841	CP006763:908105-909434	'ABRINI_FRU'	'ABRINI_RMG'	OK	114.487	28.3177	-2.0154	-5.27175	5e-05	0.00015337	yes
CAETHG_0843	CP006763:910507-911059	'ABRINI_FRU'	'ABRINI_RMG'	OK	33.5422	8.19574	-2.03303	-5.62701	0.00015	0.000427948	yes
CAETHG_0844	CP006763:911063-912332	'ABRINI_FRU'	'ABRINI_RMG'	OK	186.528	152.331	-0.292177	-1.04513	0.24925	0.317804	no
CAETHG_0845	CP006763:912472-912616	'ABRINI_FRU'	'ABRINI_RMG'	OK	48.0017	162.353	1.75797	13.2135	0.02615	0.0454967	yes
CAETHG_0846	CP006763:912939-913641	'ABRINI_FRU'	'ABRINI_RMG'	OK	54.3398	20.6924	-1.39291	-3.94339	5e-05	0.00015337	yes
CAETHG_0847	CP006763:913716-915624	'ABRINI_FRU'	'ABRINI_RMG'	OK	104.472	45.9139	-1.18611	-2.88575	5e-05	0.00015337	yes
CAETHG_0848	CP006763:915766-916945	'ABRINI_FRU'	'ABRINI_RMG'	OK	37.7482	48.4282	0.359438	0.807394	0.17445	0.235412	no
CAETHG_0849	CP006763:917247-918207	'ABRINI_FRU'	'ABRINI_RMG'	OK	51.002	36.435	-0.48523	-0.992825	0.0664	0.102786	no
CAETHG_0850	CP006763:918290-918941	'ABRINI_FRU'	'ABRINI_RMG'	OK	57.756	10.8052	-2.41824	-5.58735	5e-05	0.00015337	yes
CAETHG_0851	CP006763:919048-920565	'ABRINI_FRU'	'ABRINI_RMG'	OK	10.4919	6.84835	-0.615447	-0.694641	0.62245	0.686101	no
CAETHG_0852	CP006763:919048-920565	'ABRINI_FRU'	'ABRINI_RMG'	OK	14.8117	19.0002	0.359278	0.734777	0.23165	0.299357	no
CAETHG_0853	CP006763:920702-920900	'ABRINI_FRU'	'ABRINI_RMG'	OK	340.932	99.6931	-1.77392	-12.172	5e-05	0.00015337	yes
CAETHG_0854	CP006763:921140-921977	'ABRINI_FRU'	'ABRINI_RMG'	OK	374.064	589.593	0.656434	1.5649	0.01585	0.0291741	yes
CAETHG_0855	CP006763:921989-922769	'ABRINI_FRU'	'ABRINI_RMG'	OK	469.8	1249.8	1.41158	4.19862	5e-05	0.00015337	yes
CAETHG_0856	CP006763:923368-924880	'ABRINI_FRU'	'ABRINI_RMG'	OK	83.4841	129.584	0.634317	1.54185	0.01355	0.0253805	yes
CAETHG_0857	CP006763:924995-925286	'ABRINI_FRU'	'ABRINI_RMG'	OK	86.7104	35.0233	-1.30789	-4.21763	0.0004	0.001059	yes
CAETHG_0858	CP006763:925417-925684	'ABRINI_FRU'	'ABRINI_RMG'	OK	15.7654	2.10262	-2.9065	-3.43053	0.0681	0.105063	no
CAETHG_0859	CP006763:925719-926133	'ABRINI_FRU'	'ABRINI_RMG'	OK	26.0765	11.7186	-1.15395	-2.43104	0.007	0.0141095	yes
CAETHG_0860	CP006763:926133-927980	'ABRINI_FRU'	'ABRINI_RMG'	OK	10.9829	3.95253	-1.47441	-1.61169	0.08845	0.131557	no
CAETHG_0861	CP006763:926133-927980	'ABRINI_FRU'	'ABRINI_RMG'	OK	12.2664	5.0128	-1.29103	-2.03528	0.0002	0.000558102	yes
CAETHG_0862	CP006763:928121-928874	'ABRINI_FRU'	'ABRINI_RMG'	OK	10.3954	3.52724	-1.55933	-2.32586	0.00205	0.0046585	yes
CAETHG_0863	CP006763:929034-929952	'ABRINI_FRU'	'ABRINI_RMG'	OK	8.58341	11.7032	0.447274	0.879724	0.18595	0.24862	no
CAETHG_0864	CP006763:930121-931093	'ABRINI_FRU'	'ABRINI_RMG'	OK	6.37291	10.3077	0.693703	1.21837	0.05295	0.0843567	no
CAETHG_0865	CP006763:931408-932719	'ABRINI_FRU'	'ABRINI_RMG'	OK	1.45869	3.73664	1.35707	1.62224	0.00865	0.0170079	yes
CAETHG_0866	CP006763:933060-934260	'ABRINI_FRU'	'ABRINI_RMG'	OK	1.1973	2.18392	0.867134	0.971263	0.15455	0.21256	no
CAETHG_0867	CP006763:934504-936427	'ABRINI_FRU'	'ABRINI_RMG'	OK	1.96766	7.68028	1.96467	2.95855	5e-05	0.00015337	yes
CAETHG_0868	CP006763:936469-937342	'ABRINI_FRU'	'ABRINI_RMG'	OK	1.38591	1.99315	0.524213	0.526629	0.44435	0.521196	no
CAETHG_0869	CP006763:937403-939401	'ABRINI_FRU'	'ABRINI_RMG'	OK	2.14753	4.42427	1.04276	1.60303	0.00595	0.0121836	yes
CAETHG_0870	CP006763:939618-940494	'ABRINI_FRU'	'ABRINI_RMG'	OK	19.4607	11.8694	-0.713323	-1.42627	0.0237	0.0416959	yes
CAETHG_0871	CP006763:940540-941353	'ABRINI_FRU'	'ABRINI_RMG'	OK	9.71312	11.3208	0.220973	0.425883	0.52645	0.599053	no
CAETHG_0872	CP006763:941596-942508	'ABRINI_FRU'	'ABRINI_RMG'	OK	16.1081	11.9917	-0.425748	-0.982006	0.18265	0.245065	no
CAETHG_0873	CP006763:942523-943796	'ABRINI_FRU'	'ABRINI_RMG'	OK	33.6869	8.52916	-1.98171	-3.96699	0.0024	0.00538451	yes
CAETHG_0874	CP006763:942523-943796	'ABRINI_FRU'	'ABRINI_RMG'	OK	8.91451	0.897739	-3.31179	-2.6102	0.04785	0.0773055	no
CAETHG_0875	CP006763:943812-944775	'ABRINI_FRU'	'ABRINI_RMG'	OK	38.4725	0.682764	-5.8163	-5.28942	0.00175	0.00402865	yes
CAETHG_0876	CP006763:944824-945856	'ABRINI_FRU'	'ABRINI_RMG'	NOTEST	0.877555	0.977943	0.156261	0	1	1	no
CAETHG_0877	CP006763:945903-946152	'ABRINI_FRU'	'ABRINI_RMG'	NOTEST	0.998317	2.12721	1.09139	0	1	1	no
CAETHG_0878	CP006763:946225-947317	'ABRINI_FRU'	'ABRINI_RMG'	NOTEST	0.430382	0.283717	-0.601165	0	1	1	no
CAETHG_0879	CP006763:947394-948360	'ABRINI_FRU'	'ABRINI_RMG'	NOTEST	0.571314	0.671851	0.233859	0	1	1	no
CAETHG_0880	CP006763:948395-949289	'ABRINI_FRU'	'ABRINI_RMG'	OK	0.782935	2.84307	1.86049	1.55803	0.0259	0.0451165	yes
CAETHG_0881	CP006763:949301-949721	'ABRINI_FRU'	'ABRINI_RMG'	OK	0.28729	2.81137	3.29069	1.33483	0.23745	0.305338	no
CAETHG_0882	CP006763:949786-949963	'ABRINI_FRU'	'ABRINI_RMG'	NOTEST	0.420211	0	#NAME?	0	1	1	no
CAETHG_0883	CP006763:950104-951941	'ABRINI_FRU'	'ABRINI_RMG'	OK	3.44171	1.41417	-1.28317	-1.17806	0.2402	0.308149	no
CAETHG_0884	CP006763:950104-951941	'ABRINI_FRU'	'ABRINI_RMG'	OK	4.43763	1.10561	-2.00494	-1.69498	0.0068	0.0137353	yes
CAETHG_0885	CP006763:951984-952581	'ABRINI_FRU'	'ABRINI_RMG'	NOTEST	1.71679	0	#NAME?	0	1	1	no
CAETHG_0886	CP006763:952745-953198	'ABRINI_FRU'	'ABRINI_RMG'	OK	642.355	664.203	0.0482525	0.219207	0.85665	0.886565	no
CAETHG_0887	CP006763:953225-953654	'ABRINI_FRU'	'ABRINI_RMG'	OK	1818.09	3756.08	1.0468	3.03734	0.00065	0.00164675	yes
CAETHG_0888	CP006763:953976-954441	'ABRINI_FRU'	'ABRINI_RMG'	OK	1256.39	9750.83	2.95624	8.70628	5e-05	0.00015337	yes
CAETHG_0889	CP006763:955281-956016	'ABRINI_FRU'	'ABRINI_RMG'	OK	65.0785	81.0447	0.316537	0.772544	0.23105	0.298716	no
CAETHG_0890	CP006763:956041-956707	'ABRINI_FRU'	'ABRINI_RMG'	OK	77.8118	126.697	0.703324	1.94354	0.0081	0.0160447	yes
CAETHG_0891	CP006763:956778-957627	'ABRINI_FRU'	'ABRINI_RMG'	OK	53.3518	21.1812	-1.33275	-2.93998	5e-05	0.00015337	yes
CAETHG_0892	CP006763:959152-959668	'ABRINI_FRU'	'ABRINI_RMG'	OK	118.765	37.9053	-1.64764	-4.84815	5e-05	0.00015337	yes
CAETHG_0893	CP006763:960168-960603	'ABRINI_FRU'	'ABRINI_RMG'	OK	663.457	923.761	0.477518	1.56919	0.0648	0.100717	no
CAETHG_0894	CP006763:960739-960919	'ABRINI_FRU'	'ABRINI_RMG'	OK	2559.58	4725.16	0.884457	8.63608	0.00095	0.00232215	yes
CAETHG_0895	CP006763:961140-961536	'ABRINI_FRU'	'ABRINI_RMG'	OK	766.647	408.43	-0.908476	-3.12407	0.0007	0.00176059	yes
CAETHG_0896	CP006763:961745-963176	'ABRINI_FRU'	'ABRINI_RMG'	OK	80.5465	25.1744	-1.67786	-4.65001	5e-05	0.00015337	yes
CAETHG_0897	CP006763:963257-965258	'ABRINI_FRU'	'ABRINI_RMG'	OK	209.59	1903.62	3.18311	5.46574	5e-05	0.00015337	yes
CAETHG_0898	CP006763:965402-966917	'ABRINI_FRU'	'ABRINI_RMG'	OK	25.2586	20.1534	-0.325752	-0.7109	0.2234	0.290727	no
CAETHG_0899	CP006763:967638-969804	'ABRINI_FRU'	'ABRINI_RMG'	OK	5.04557	4.62135	-0.1267	-0.227753	0.6948	0.750981	no
CAETHG_0900	CP006763:970013-970772	'ABRINI_FRU'	'ABRINI_RMG'	OK	172.195	51.3206	-1.74644	-4.6474	5e-05	0.00015337	yes
CAETHG_0901	CP006763:971076-971745	'ABRINI_FRU'	'ABRINI_RMG'	OK	81.2181	23.4397	-1.79285	-4.32773	5e-05	0.00015337	yes
CAETHG_0902	CP006763:971789-972239	'ABRINI_FRU'	'ABRINI_RMG'	OK	44.2981	10.7813	-2.03872	-4.60419	5e-05	0.00015337	yes
CAETHG_0903	CP006763:972421-972931	'ABRINI_FRU'	'ABRINI_RMG'	OK	193.988	229.107	0.240057	0.670835	0.36105	0.43648	no
CAETHG_0904	CP006763:972945-973761	'ABRINI_FRU'	'ABRINI_RMG'	OK	106.608	245.368	1.20263	3.37384	5e-05	0.00015337	yes
CAETHG_0905	CP006763:973788-974925	'ABRINI_FRU'	'ABRINI_RMG'	OK	75.9823	133.817	0.816531	2.59717	0.00195	0.00444889	yes
CAETHG_0906	CP006763:974946-977287	'ABRINI_FRU'	'ABRINI_RMG'	OK	42.8578	68.9497	0.685987	1.05762	0.0908	0.134633	no
CAETHG_0907	CP006763:974946-977287	'ABRINI_FRU'	'ABRINI_RMG'	OK	50.8457	73.2614	0.526927	0.774713	0.10905	0.158076	no
CAETHG_0908	CP006763:977305-978397	'ABRINI_FRU'	'ABRINI_RMG'	OK	77.3342	143.463	0.891503	2.10091	0.0008	0.00198813	yes
CAETHG_0909	CP006763:978411-979278	'ABRINI_FRU'	'ABRINI_RMG'	OK	91.312	165.558	0.858457	2.04846	0.0013	0.00309394	yes
CAETHG_0910	CP006763:979304-980339	'ABRINI_FRU'	'ABRINI_RMG'	OK	165.134	204.153	0.306013	0.677261	0.2427	0.310765	no
CAETHG_0911	CP006763:980495-980654	'ABRINI_FRU'	'ABRINI_RMG'	OK	46.4386	76.7271	0.724412	4.47764	0.27535	0.346157	no
CAETHG_0912	CP006763:980948-982223	'ABRINI_FRU'	'ABRINI_RMG'	OK	1115.04	1463.81	0.392625	0.703827	0.2424	0.310451	no
CAETHG_0913	CP006763:982531-983371	'ABRINI_FRU'	'ABRINI_RMG'	OK	160.186	66.9021	-1.25963	-4.01604	5e-05	0.00015337	yes
CAETHG_0914	CP006763:983495-984239	'ABRINI_FRU'	'ABRINI_RMG'	OK	17.758	11.8743	-0.580622	-1.16656	0.0769	0.116431	no
CAETHG_0915	CP006763:984289-986355	'ABRINI_FRU'	'ABRINI_RMG'	OK	1.31767	1.64232	0.317747	0.408012	0.5072	0.581475	no
CAETHG_0917	CP006763:986824-987094	'ABRINI_FRU'	'ABRINI_RMG'	OK	109.827	57.2901	-0.938876	-4.39415	0.0094	0.0183068	yes
CAETHG_0918	CP006763:987112-988471	'ABRINI_FRU'	'ABRINI_RMG'	OK	184.381	205.717	0.15797	0.352921	0.53715	0.609234	no
CAETHG_0919	CP006763:988643-989702	'ABRINI_FRU'	'ABRINI_RMG'	OK	144.417	135.85	-0.0882179	-0.240125	0.7274	0.77895	no
CAETHG_0920	CP006763:989893-990937	'ABRINI_FRU'	'ABRINI_RMG'	OK	84.8533	200.319	1.23925	2.91644	5e-05	0.00015337	yes
CAETHG_0921	CP006763:991109-991637	'ABRINI_FRU'	'ABRINI_RMG'	OK	37.253	35.6172	-0.0647827	-0.182894	0.8324	0.866813	no
CAETHG_0922	CP006763:992020-992647	'ABRINI_FRU'	'ABRINI_RMG'	OK	60.034	47.443	-0.339584	-0.993411	0.23035	0.29808	no
CAETHG_0923	CP006763:992672-993092	'ABRINI_FRU'	'ABRINI_RMG'	OK	201.759	233.523	0.210931	0.90916	0.43245	0.509269	no
CAETHG_0924	CP006763:993135-994464	'ABRINI_FRU'	'ABRINI_RMG'	OK	126.972	70.6534	-0.845678	-2.0751	0.0014	0.00330587	yes
CAETHG_0925	CP006763:994589-995012	'ABRINI_FRU'	'ABRINI_RMG'	OK	19.7076	11.0784	-0.831	-1.87657	0.06225	0.0973208	no
CAETHG_0926	CP006763:995054-995846	'ABRINI_FRU'	'ABRINI_RMG'	OK	188.778	20.6168	-3.1948	-10.7011	5e-05	0.00015337	yes
CAETHG_0927	CP006763:996280-996373	'ABRINI_FRU'	'ABRINI_RMG'	NOTEST	0	0	0	0	1	1	no
CAETHG_0928	CP006763:996684-1000209	'ABRINI_FRU'	'ABRINI_RMG'	OK	10.1676	12.2981	0.274467	0.56665	0.30325	0.375916	no
CAETHG_0929	CP006763:1000381-1000549	'ABRINI_FRU'	'ABRINI_RMG'	OK	37.9353	45.7672	0.270772	1.17468	0.66395	0.723074	no
CAETHG_0930	CP006763:1000747-1002526	'ABRINI_FRU'	'ABRINI_RMG'	OK	38.5779	59.3001	0.620259	1.39714	0.01715	0.0313806	yes
CAETHG_0931	CP006763:1002623-1003373	'ABRINI_FRU'	'ABRINI_RMG'	OK	228.302	45.8221	-2.31683	-6.32154	5e-05	0.00015337	yes
CAETHG_0932	CP006763:1003391-1004177	'ABRINI_FRU'	'ABRINI_RMG'	OK	78.7952	24.1082	-1.70859	-4.9174	5e-05	0.00015337	yes
CAETHG_0933	CP006763:1004359-1005541	'ABRINI_FRU'	'ABRINI_RMG'	OK	21.2453	18.1053	-0.230734	-0.555625	0.425	0.502145	no
CAETHG_0934	CP006763:1005592-1006411	'ABRINI_FRU'	'ABRINI_RMG'	OK	184.799	213.194	0.206209	0.566443	0.4331	0.509877	no
CAETHG_0935	CP006763:1006594-1007128	'ABRINI_FRU'	'ABRINI_RMG'	OK	36.3087	13.5343	-1.42369	-3.59184	0.0003	0.000809958	yes
CAETHG_0936	CP006763:1007401-1008025	'ABRINI_FRU'	'ABRINI_RMG'	OK	60.6648	11.1724	-2.44092	-6.43471	5e-05	0.00015337	yes
CAETHG_0937	CP006763:1008193-1009648	'ABRINI_FRU'	'ABRINI_RMG'	OK	27.5378	92.6467	1.75033	5.65423	5e-05	0.00015337	yes
CAETHG_0938	CP006763:1009662-1010355	'ABRINI_FRU'	'ABRINI_RMG'	OK	39.351	248.27	2.65744	7.70367	5e-05	0.00015337	yes
CAETHG_0939	CP006763:1010702-1012148	'ABRINI_FRU'	'ABRINI_RMG'	OK	1.39228	4.52272	1.69974	2.15281	0.00155	0.00362204	yes
CAETHG_0940	CP006763:1012314-1012953	'ABRINI_FRU'	'ABRINI_RMG'	OK	31.3181	36.466	0.219554	0.634998	0.46155	0.538561	no
CAETHG_0941	CP006763:1013005-1014217	'ABRINI_FRU'	'ABRINI_RMG'	OK	60.9228	60.6355	-0.00681869	-0.01995	0.98105	0.984684	no
CAETHG_0942	CP006763:1014360-1014723	'ABRINI_FRU'	'ABRINI_RMG'	OK	1.54093	5.18492	1.75052	1.71673	0.1271	0.180031	no
CAETHG_0943	CP006763:1014788-1017308	'ABRINI_FRU'	'ABRINI_RMG'	OK	5.03517	10.0229	0.993184	1.86708	0.00095	0.00232215	yes
CAETHG_0944	CP006763:1017532-1018093	'ABRINI_FRU'	'ABRINI_RMG'	OK	4.11072	7.40267	0.848654	1.30934	0.1182	0.169624	no
CAETHG_0945	CP006763:1018321-1018429	'ABRINI_FRU'	'ABRINI_RMG'	OK	14.5375	29.1121	1.00184	4.46425	0.5621	0.63197	no
CAETHG_0946	CP006763:1018554-1018917	'ABRINI_FRU'	'ABRINI_RMG'	OK	4.92875	0.390374	-3.65829	-1.12309	0.0419	0.068837	no
CAETHG_0947	CP006763:1019017-1019305	'ABRINI_FRU'	'ABRINI_RMG'	OK	8.48115	9.07204	0.097167	0.195443	0.8938	0.917069	no
CAETHG_0948	CP006763:1019742-1020711	'ABRINI_FRU'	'ABRINI_RMG'	OK	6.36661	20.4379	1.68265	3.3698	5e-05	0.00015337	yes
CAETHG_0949	CP006763:1020826-1021066	'ABRINI_FRU'	'ABRINI_RMG'	OK	38.3837	20.5326	-0.902577	-2.45818	0.06425	0.0999706	no
CAETHG_0950	CP006763:1021239-1021533	'ABRINI_FRU'	'ABRINI_RMG'	OK	5.79753	15.8424	1.45028	2.89918	0.06835	0.105364	no
CAETHG_0951	CP006763:1021701-1022235	'ABRINI_FRU'	'ABRINI_RMG'	OK	4.10035	3.909	-0.0689482	-0.101317	0.91425	0.932711	no
CAETHG_0952	CP006763:1022327-1022780	'ABRINI_FRU'	'ABRINI_RMG'	OK	7.63916	2.32415	-1.71671	-2.24364	0.0513	0.08207	no
CAETHG_0953	CP006763:1023007-1024198	'ABRINI_FRU'	'ABRINI_RMG'	OK	10.6079	5.86087	-0.85595	-1.84603	0.01635	0.0300125	yes
CAETHG_0954	CP006763:1024466-1024682	'ABRINI_FRU'	'ABRINI_RMG'	OK	131.79	75.8561	-0.7969	-4.14686	0.0312	0.0532173	no
CAETHG_0955	CP006763:1025187-1025640	'ABRINI_FRU'	'ABRINI_RMG'	OK	96.2894	301.736	1.64784	5.06824	5e-05	0.00015337	yes
CAETHG_0956	CP006763:1025860-1029905	'ABRINI_FRU'	'ABRINI_RMG'	OK	7.43889	11.5315	0.632415	0.567749	0.45705	0.534017	no
CAETHG_0957	CP006763:1025860-1029905	'ABRINI_FRU'	'ABRINI_RMG'	OK	10.7055	16.7357	0.644581	1.15272	0.139	0.194153	no
CAETHG_0958	CP006763:1025860-1029905	'ABRINI_FRU'	'ABRINI_RMG'	OK	4.94066	13.9061	1.49294	1.1711	0.31285	0.386272	no
CAETHG_0959	CP006763:1025860-1029905	'ABRINI_FRU'	'ABRINI_RMG'	OK	13.8496	47.7011	1.78418	3.10693	0.0001	0.00029355	yes
CAETHG_0960	CP006763:1029952-1030150	'ABRINI_FRU'	'ABRINI_RMG'	NOTEST	1.36832	1.46854	0.101979	0	1	1	no
CAETHG_0961	CP006763:1030357-1031434	'ABRINI_FRU'	'ABRINI_RMG'	OK	67.3448	59.7731	-0.172071	-0.403952	0.51485	0.588657	no
CAETHG_0962	CP006763:1031526-1031712	'ABRINI_FRU'	'ABRINI_RMG'	NOTEST	0	1.76143	inf	0	1	1	no
CAETHG_0963	CP006763:1031804-1032104	'ABRINI_FRU'	'ABRINI_RMG'	OK	8.11114	2.42464	-1.74214	-2.23138	0.12225	0.174476	no
CAETHG_0964	CP006763:1032122-1032758	'ABRINI_FRU'	'ABRINI_RMG'	OK	6.74676	1.74487	-1.95107	-2.29175	0.0154	0.0284416	yes
CAETHG_0965	CP006763:1032925-1034074	'ABRINI_FRU'	'ABRINI_RMG'	OK	6.51328	7.31462	0.167399	0.366619	0.652	0.712904	no
CAETHG_0966	CP006763:1034348-1034993	'ABRINI_FRU'	'ABRINI_RMG'	OK	86.2906	26.5743	-1.69917	-4.93808	5e-05	0.00015337	yes
CAETHG_0967	CP006763:1035015-1036041	'ABRINI_FRU'	'ABRINI_RMG'	OK	47.9653	17.0899	-1.48885	-3.29942	5e-05	0.00015337	yes
CAETHG_0968	CP006763:1036076-1037087	'ABRINI_FRU'	'ABRINI_RMG'	OK	20.2937	10.0272	-1.01711	-1.99494	0.00145	0.00341199	yes
CAETHG_0969	CP006763:1037469-1038531	'ABRINI_FRU'	'ABRINI_RMG'	OK	75.0203	245.466	1.71017	4.02898	5e-05	0.00015337	yes
CAETHG_0970	CP006763:1038536-1038851	'ABRINI_FRU'	'ABRINI_RMG'	OK	28.4021	37.8153	0.412976	1.10799	0.26985	0.340287	no
CAETHG_0971	CP006763:1039267-1039462	'ABRINI_FRU'	'ABRINI_RMG'	OK	88.1192	22.6286	-1.96131	-8.10513	0.0059	0.0121072	yes
CAETHG_0972	CP006763:1039917-1043217	'ABRINI_FRU'	'ABRINI_RMG'	OK	18.0814	17.1959	-0.0724439	-0.16981	0.7849	0.827467	no
CAETHG_0973	CP006763:1043290-1043587	'ABRINI_FRU'	'ABRINI_RMG'	OK	1688.07	2883.31	0.772351	3.27658	0.0046	0.00967848	yes
CAETHG_0974	CP006763:1043685-1044249	'ABRINI_FRU'	'ABRINI_RMG'	OK	440.317	455.326	0.0483567	0.146093	0.85095	0.882019	no
CAETHG_0975	CP006763:1044340-1045564	'ABRINI_FRU'	'ABRINI_RMG'	OK	2.93566	2.00306	-0.551479	-0.707525	0.25165	0.320472	no
CAETHG_0976	CP006763:1045712-1046174	'ABRINI_FRU'	'ABRINI_RMG'	OK	7.62589	5.88597	-0.373624	-0.590984	0.4816	0.557757	no
CAETHG_0977	CP006763:1046256-1046784	'ABRINI_FRU'	'ABRINI_RMG'	OK	11.4291	12.9313	0.178154	0.322512	0.6367	0.698786	no
CAETHG_0978	CP006763:1046883-1047447	'ABRINI_FRU'	'ABRINI_RMG'	OK	53.7228	17.4577	-1.62167	-3.90473	5e-05	0.00015337	yes
CAETHG_0979	CP006763:1047725-1048136	'ABRINI_FRU'	'ABRINI_RMG'	OK	216.433	66.5817	-1.70072	-5.542	5e-05	0.00015337	yes
CAETHG_0980	CP006763:1048213-1048390	'ABRINI_FRU'	'ABRINI_RMG'	OK	41.9037	10.7563	-1.96189	-7.04921	0.1328	0.18679	no
CAETHG_0981	CP006763:1048730-1048955	'ABRINI_FRU'	'ABRINI_RMG'	OK	112.905	88.6023	-0.349693	-1.69673	0.30205	0.374712	no
CAETHG_0982	CP006763:1049105-1050005	'ABRINI_FRU'	'ABRINI_RMG'	OK	15.0666	39.9339	1.40626	3.1444	5e-05	0.00015337	yes
CAETHG_0983	CP006763:1050088-1052083	'ABRINI_FRU'	'ABRINI_RMG'	OK	192.248	1132.11	2.55798	4.32566	5e-05	0.00015337	yes
CAETHG_0984	CP006763:1052295-1052847	'ABRINI_FRU'	'ABRINI_RMG'	OK	54.1807	26.7755	-1.01687	-3.07263	0.0021	0.00476269	yes
CAETHG_0985	CP006763:1053010-1054132	'ABRINI_FRU'	'ABRINI_RMG'	OK	65.6498	352.741	2.42575	5.51048	5e-05	0.00015337	yes
CAETHG_0986	CP006763:1054204-1055606	'ABRINI_FRU'	'ABRINI_RMG'	OK	15.6749	12.7696	-0.295739	-0.499469	0.51235	0.5865	no
CAETHG_0987	CP006763:1054204-1055606	'ABRINI_FRU'	'ABRINI_RMG'	OK	57.0681	20.1643	-1.50088	-2.23879	0.0012	0.00287864	yes
CAETHG_0988	CP006763:1055875-1056910	'ABRINI_FRU'	'ABRINI_RMG'	OK	135.245	30.0892	-2.16826	-5.06128	5e-05	0.00015337	yes
CAETHG_0989	CP006763:1057010-1062662	'ABRINI_FRU'	'ABRINI_RMG'	OK	25.3192	13.2773	-0.931274	-1.51383	0.01075	0.0206311	yes
CAETHG_0990	CP006763:1057010-1062662	'ABRINI_FRU'	'ABRINI_RMG'	OK	21.534	12.1248	-0.82866	-0.702746	0.4182	0.495438	no
CAETHG_0991	CP006763:1057010-1062662	'ABRINI_FRU'	'ABRINI_RMG'	OK	12.77	8.92782	-0.516382	-0.403827	0.50145	0.57615	no
CAETHG_0992	CP006763:1057010-1062662	'ABRINI_FRU'	'ABRINI_RMG'	NOTEST	1.99748	1.28266	-0.639042	0	1	1	no
CAETHG_0993	CP006763:1057010-1062662	'ABRINI_FRU'	'ABRINI_RMG'	OK	4.10585	5.10992	0.315618	0.245172	0.6261	0.689064	no
CAETHG_0994	CP006763:1062737-1063922	'ABRINI_FRU'	'ABRINI_RMG'	OK	5.74577	11.956	1.05716	1.87241	0.00155	0.00362204	yes
CAETHG_0995	CP006763:1063940-1065530	'ABRINI_FRU'	'ABRINI_RMG'	OK	2.05469	1.46092	-0.492043	-0.592163	0.31005	0.383392	no
CAETHG_0996	CP006763:1065572-1066502	'ABRINI_FRU'	'ABRINI_RMG'	NOTEST	1.29095	0.992137	-0.379825	0	1	1	no
CAETHG_0997	CP006763:1066505-1069119	'ABRINI_FRU'	'ABRINI_RMG'	NOTEST	1.15172	0.665927	-0.790351	0	1	1	no
CAETHG_0998	CP006763:1066505-1069119	'ABRINI_FRU'	'ABRINI_RMG'	OK	1.61522	2.07098	0.358583	0.400853	0.4785	0.554839	no
CAETHG_0999	CP006763:1069136-1070264	'ABRINI_FRU'	'ABRINI_RMG'	OK	6.92596	5.49398	-0.334161	-0.552206	0.3403	0.415158	no
CAETHG_1000	CP006763:1070859-1071519	'ABRINI_FRU'	'ABRINI_RMG'	OK	404.145	331.078	-0.287704	-1.07806	0.2551	0.32411	no
CAETHG_1001	CP006763:1071589-1072510	'ABRINI_FRU'	'ABRINI_RMG'	OK	20.7327	15.1889	-0.448892	-0.948404	0.13325	0.187239	no
CAETHG_1002	CP006763:1072841-1074011	'ABRINI_FRU'	'ABRINI_RMG'	OK	4.35726	0.61691	-2.82029	-2.45018	0.004	0.00853348	yes
CAETHG_1003	CP006763:1074167-1074530	'ABRINI_FRU'	'ABRINI_RMG'	OK	25.0094	7.73529	-1.69294	-3.47794	0.00345	0.00747837	yes
CAETHG_1004	CP006763:1074571-1077421	'ABRINI_FRU'	'ABRINI_RMG'	OK	33.5829	23.334	-0.52529	-1.22107	0.0439	0.0718039	no
CAETHG_1005	CP006763:1077437-1078508	'ABRINI_FRU'	'ABRINI_RMG'	OK	33.7009	12.1705	-1.4694	-3.30992	5e-05	0.00015337	yes
CAETHG_1006	CP006763:1079123-1079831	'ABRINI_FRU'	'ABRINI_RMG'	OK	15.1051	3.32549	-2.18339	-4.20836	0.0008	0.00198813	yes
CAETHG_1007	CP006763:1079832-1081214	'ABRINI_FRU'	'ABRINI_RMG'	OK	33.9068	9.14942	-1.88982	-7.04927	0.00695	0.0140186	yes
CAETHG_1008	CP006763:1079832-1081214	'ABRINI_FRU'	'ABRINI_RMG'	OK	36.3221	8.04726	-2.17428	-2.64784	0.00925	0.0180514	yes
CAETHG_1009	CP006763:1081253-1081814	'ABRINI_FRU'	'ABRINI_RMG'	OK	44.6694	15.0869	-1.56599	-4.53683	5e-05	0.00015337	yes
CAETHG_1010	CP006763:1081993-1082751	'ABRINI_FRU'	'ABRINI_RMG'	OK	177.97	38.0268	-2.22655	-5.96657	5e-05	0.00015337	yes
CAETHG_1011	CP006763:1081993-1082751	'ABRINI_FRU'	'ABRINI_RMG'	OK	51.6066	0	#NAME?	#NAME?	0.2389	0.306997	no
CAETHG_1012	CP006763:1083121-1084090	'ABRINI_FRU'	'ABRINI_RMG'	OK	77.2987	31.7312	-1.28454	-2.8856	5e-05	0.00015337	yes
CAETHG_1013	CP006763:1084477-1085878	'ABRINI_FRU'	'ABRINI_RMG'	OK	60.0201	55.7134	-0.10742	-0.298368	0.6832	0.740677	no
CAETHG_1014	CP006763:1085879-1086608	'ABRINI_FRU'	'ABRINI_RMG'	OK	95.6447	61.0497	-0.6477	-1.75749	0.0147	0.0272806	yes
CAETHG_1015	CP006763:1086644-1089381	'ABRINI_FRU'	'ABRINI_RMG'	OK	56.5304	33.1444	-0.770262	-1.71785	0.01565	0.0288569	yes
CAETHG_1016	CP006763:1086644-1089381	'ABRINI_FRU'	'ABRINI_RMG'	OK	63.6129	45.129	-0.495267	-0.612081	0.29135	0.36368	no
CAETHG_1017	CP006763:1090083-1090827	'ABRINI_FRU'	'ABRINI_RMG'	OK	56.0687	51.4687	-0.123501	-0.439135	0.66275	0.721987	no
CAETHG_1018	CP006763:1090827-1093588	'ABRINI_FRU'	'ABRINI_RMG'	OK	61.6044	131.354	1.09236	2.39003	0.0459	0.0746811	no
CAETHG_1019	CP006763:1090827-1093588	'ABRINI_FRU'	'ABRINI_RMG'	OK	59.5439	93.4596	0.650388	1.31431	0.02635	0.0457752	yes
CAETHG_1020	CP006763:1094422-1095109	'ABRINI_FRU'	'ABRINI_RMG'	OK	61.5266	33.0448	-0.896789	-2.67337	0.002	0.00455209	yes
CAETHG_1021	CP006763:1095198-1098081	'ABRINI_FRU'	'ABRINI_RMG'	OK	27.4865	28.2067	0.0373152	0.0903636	0.88485	0.910982	no
CAETHG_1022	CP006763:1099033-1099366	'ABRINI_FRU'	'ABRINI_RMG'	OK	8.30736	3.04481	-1.44804	-2.06342	0.1278	0.180799	no
CAETHG_1023	CP006763:1099600-1099777	'ABRINI_FRU'	'ABRINI_RMG'	OK	86.3724	28.2631	-1.61165	-7.92966	0.02365	0.0416207	yes
CAETHG_1024	CP006763:1099809-1100268	'ABRINI_FRU'	'ABRINI_RMG'	OK	35.4299	22.437	-0.659087	-1.6332	0.05255	0.0838359	no
CAETHG_1025	CP006763:1100377-1101715	'ABRINI_FRU'	'ABRINI_RMG'	OK	5.11916	0.384481	-3.73492	-4.48058	0.06645	0.10285	no
CAETHG_1026	CP006763:1101718-1102444	'ABRINI_FRU'	'ABRINI_RMG'	OK	2.57282	1.06111	-1.27778	-1.40142	0.1918	0.255192	no
CAETHG_1027	CP006763:1102648-1103371	'ABRINI_FRU'	'ABRINI_RMG'	OK	40.4627	9.93808	-2.02555	-4.56504	5e-05	0.00015337	yes
CAETHG_1028	CP006763:1103630-1104911	'ABRINI_FRU'	'ABRINI_RMG'	OK	24.3764	19.4401	-0.326452	-1.27682	0.27605	0.346809	no
CAETHG_1029	CP006763:1105047-1105992	'ABRINI_FRU'	'ABRINI_RMG'	OK	84.62	28.6619	-1.56186	-3.50357	5e-05	0.00015337	yes
CAETHG_1030	CP006763:1106121-1106502	'ABRINI_FRU'	'ABRINI_RMG'	OK	27.2268	8.92357	-1.60934	-3.23193	0.0017	0.00393011	yes
CAETHG_1031	CP006763:1106505-1107294	'ABRINI_FRU'	'ABRINI_RMG'	OK	111.299	51.823	-1.10278	-2.51736	5e-05	0.00015337	yes
CAETHG_1032	CP006763:1107311-1112214	'ABRINI_FRU'	'ABRINI_RMG'	OK	61.1967	21.2179	-1.52817	-2.70254	5e-05	0.00015337	yes
CAETHG_1033	CP006763:1107311-1112214	'ABRINI_FRU'	'ABRINI_RMG'	OK	21.786	9.60945	-1.18088	-1.06883	0.0394	0.0651497	no
CAETHG_1034	CP006763:1112506-1113844	'ABRINI_FRU'	'ABRINI_RMG'	OK	60.8736	53.1888	-0.194693	-0.544439	0.46255	0.539454	no
CAETHG_1035	CP006763:1113855-1114590	'ABRINI_FRU'	'ABRINI_RMG'	OK	32.564	24.7848	-0.393825	-1.39846	0.2134	0.27984	no
CAETHG_1036	CP006763:1114626-1114839	'ABRINI_FRU'	'ABRINI_RMG'	NOTEST	0.882487	0	#NAME?	0	1	1	no
CAETHG_1037	CP006763:1114937-1115993	'ABRINI_FRU'	'ABRINI_RMG'	OK	13.0467	11.6914	-0.15823	-0.322327	0.6065	0.671878	no
CAETHG_1038	CP006763:1116304-1121431	'ABRINI_FRU'	'ABRINI_RMG'	OK	55.7897	39.7931	-0.487479	-0.85455	0.0623	0.0973724	no
CAETHG_1039	CP006763:1121574-1121874	'ABRINI_FRU'	'ABRINI_RMG'	OK	27.3682	18.4353	-0.570027	-1.65454	0.2331	0.300892	no
CAETHG_1040	CP006763:1121903-1122575	'ABRINI_FRU'	'ABRINI_RMG'	OK	28.3405	18.4389	-0.620108	-1.23959	0.04255	0.0697749	no
CAETHG_1041	CP006763:1122655-1123153	'ABRINI_FRU'	'ABRINI_RMG'	OK	18.0477	4.00782	-2.17093	-3.53454	0.002	0.00455209	yes
CAETHG_1042	CP006763:1123230-1124244	'ABRINI_FRU'	'ABRINI_RMG'	OK	30.0646	6.23431	-2.26976	-4.35245	5e-05	0.00015337	yes
CAETHG_1043	CP006763:1124818-1125088	'ABRINI_FRU'	'ABRINI_RMG'	OK	24.3685	16.932	-0.525264	-1.30137	0.2836	0.355127	no
CAETHG_1044	CP006763:1125434-1126169	'ABRINI_FRU'	'ABRINI_RMG'	OK	46.9512	35.1733	-0.416681	-1.67154	0.1664	0.226145	no
CAETHG_1045	CP006763:1126521-1127499	'ABRINI_FRU'	'ABRINI_RMG'	OK	21.9199	12.4972	-0.810635	-1.77362	0.0085	0.0167503	yes
CAETHG_1046	CP006763:1127640-1128502	'ABRINI_FRU'	'ABRINI_RMG'	OK	9.88358	1.85029	-2.41728	-2.50257	0.2949	0.367272	no
CAETHG_1047	CP006763:1127640-1128502	'ABRINI_FRU'	'ABRINI_RMG'	OK	13.2172	1.91224	-2.78908	-2.91811	0.001	0.002434	yes
CAETHG_1048	CP006763:1129131-1131126	'ABRINI_FRU'	'ABRINI_RMG'	OK	1.69029	0.801972	-1.07564	-1.2577	0.0582	0.0917268	no
CAETHG_1049	CP006763:1131777-1133148	'ABRINI_FRU'	'ABRINI_RMG'	NOTEST	0.977348	0.687448	-0.507621	0	1	1	no
CAETHG_1050	CP006763:1133251-1134364	'ABRINI_FRU'	'ABRINI_RMG'	NOTEST	0.959754	0.778565	-0.301847	0	1	1	no
CAETHG_1051	CP006763:1134448-1136386	'ABRINI_FRU'	'ABRINI_RMG'	NOTEST	0.711635	0.214524	-1.73	0	1	1	no
CAETHG_1052	CP006763:1136475-1139208	'ABRINI_FRU'	'ABRINI_RMG'	NOTEST	0.750427	0.465469	-0.689028	0	1	1	no
CAETHG_1053	CP006763:1136475-1139208	'ABRINI_FRU'	'ABRINI_RMG'	NOTEST	1.09395	0.886809	-0.302858	0	1	1	no
CAETHG_1054	CP006763:1136475-1139208	'ABRINI_FRU'	'ABRINI_RMG'	OK	1.30882	1.23376	-0.0852023	-0.0234613	0.90635	0.927208	no
CAETHG_1055	CP006763:1139369-1140533	'ABRINI_FRU'	'ABRINI_RMG'	NOTEST	0.324679	0	#NAME?	0	1	1	no
CAETHG_1056	CP006763:1141469-1142084	'ABRINI_FRU'	'ABRINI_RMG'	OK	390.773	110.985	-1.81596	-6.00459	5e-05	0.00015337	yes
CAETHG_1057	CP006763:1142564-1143359	'ABRINI_FRU'	'ABRINI_RMG'	NOTEST	1.16239	0.202198	-2.52326	0	1	1	no
CAETHG_1058	CP006763:1143504-1144875	'ABRINI_FRU'	'ABRINI_RMG'	OK	10.0419	3.16679	-1.66494	-2.7764	5e-05	0.00015337	yes
CAETHG_1059	CP006763:1145072-1146080	'ABRINI_FRU'	'ABRINI_RMG'	OK	183.126	206.816	0.175507	0.436342	0.48875	0.564215	no
CAETHG_1060	CP006763:1146214-1146781	'ABRINI_FRU'	'ABRINI_RMG'	OK	61.3466	21.4262	-1.51761	-4.28621	5e-05	0.00015337	yes
CAETHG_1061	CP006763:1146846-1148561	'ABRINI_FRU'	'ABRINI_RMG'	OK	73.4674	114.084	0.634924	1.0775	0.15845	0.21709	no
CAETHG_1062	CP006763:1146846-1148561	'ABRINI_FRU'	'ABRINI_RMG'	OK	93.93	75.411	-0.31681	-0.611625	0.3413	0.416201	no
CAETHG_1063	CP006763:1149302-1150058	'ABRINI_FRU'	'ABRINI_RMG'	OK	40.9894	18.0466	-1.18353	-3.17813	0.0002	0.000558102	yes
CAETHG_1064	CP006763:1150294-1151128	'ABRINI_FRU'	'ABRINI_RMG'	OK	2308.59	2733.27	0.243614	0.556231	0.4526	0.529518	no
CAETHG_1065	CP006763:1151393-1152560	'ABRINI_FRU'	'ABRINI_RMG'	OK	178.35	182.07	0.0297834	0.0655661	0.9083	0.928789	no
CAETHG_1066	CP006763:1153072-1153723	'ABRINI_FRU'	'ABRINI_RMG'	OK	6.08859	25.0094	2.03829	4.05444	5e-05	0.00015337	yes
CAETHG_1067	CP006763:1153740-1155641	'ABRINI_FRU'	'ABRINI_RMG'	OK	10.7661	40.9382	1.92696	2.71939	0.0001	0.00029355	yes
CAETHG_1068	CP006763:1153740-1155641	'ABRINI_FRU'	'ABRINI_RMG'	OK	6.49486	38.8723	2.58137	3.7083	5e-05	0.00015337	yes
CAETHG_1069	CP006763:1155779-1156223	'ABRINI_FRU'	'ABRINI_RMG'	OK	9.75976	20.4659	1.0683	2.85328	0.03575	0.0599703	no
CAETHG_1070	CP006763:1156253-1158524	'ABRINI_FRU'	'ABRINI_RMG'	OK	46.4067	160.464	1.78984	4.40046	5e-05	0.00015337	yes
CAETHG_1071	CP006763:1158840-1159125	'ABRINI_FRU'	'ABRINI_RMG'	OK	14.8039	50.9608	1.78341	4.57409	0.001	0.002434	yes
CAETHG_1072	CP006763:1159352-1160261	'ABRINI_FRU'	'ABRINI_RMG'	OK	163.244	149.844	-0.12357	-0.330972	0.6296	0.692518	no
CAETHG_1073	CP006763:1160390-1164740	'ABRINI_FRU'	'ABRINI_RMG'	OK	202.771	156.891	-0.37009	-0.665202	0.20255	0.267817	no
CAETHG_1074	CP006763:1165040-1165703	'ABRINI_FRU'	'ABRINI_RMG'	OK	68.518	29.6731	-1.20733	-3.77203	5e-05	0.00015337	yes
CAETHG_1075	CP006763:1166048-1166237	'ABRINI_FRU'	'ABRINI_RMG'	OK	11.9182	68.4411	2.5217	7.62599	0.0134	0.0251488	yes
CAETHG_1076	CP006763:1166314-1166884	'ABRINI_FRU'	'ABRINI_RMG'	OK	183.801	64.7261	-1.50573	-4.62665	5e-05	0.00015337	yes
CAETHG_1077	CP006763:1167039-1167219	'ABRINI_FRU'	'ABRINI_RMG'	NOTEST	0	0	0	0	1	1	no
CAETHG_1078	CP006763:1167437-1168607	'ABRINI_FRU'	'ABRINI_RMG'	OK	9.76982	15.9945	0.711172	1.4044	0.02035	0.0364109	yes
CAETHG_1079	CP006763:1168639-1170613	'ABRINI_FRU'	'ABRINI_RMG'	OK	9.00337	15.1916	0.754737	1.43419	0.00735	0.0147115	yes
CAETHG_1080	CP006763:1170641-1171811	'ABRINI_FRU'	'ABRINI_RMG'	OK	10.659	18.6455	0.806753	1.57901	0.00705	0.0141928	yes
CAETHG_1081	CP006763:1172085-1173651	'ABRINI_FRU'	'ABRINI_RMG'	OK	25.9516	23.897	-0.118999	-0.319789	0.67395	0.73231	no
CAETHG_1082	CP006763:1173839-1174472	'ABRINI_FRU'	'ABRINI_RMG'	OK	278.278	221.307	-0.330478	-0.930276	0.1928	0.256166	no
CAETHG_1083	CP006763:1174844-1175426	'ABRINI_FRU'	'ABRINI_RMG'	OK	9.34258	17.9101	0.938881	1.8433	0.01445	0.0268558	yes
CAETHG_1084	CP006763:1175640-1175847	'ABRINI_FRU'	'ABRINI_RMG'	OK	64.7933	13.505	-2.26236	-6.76121	0.0068	0.0137353	yes
CAETHG_1085	CP006763:1175951-1176764	'ABRINI_FRU'	'ABRINI_RMG'	OK	8.11276	7.84681	-0.0480866	-0.0833614	0.89365	0.916997	no
CAETHG_1086	CP006763:1176841-1177030	'ABRINI_FRU'	'ABRINI_RMG'	NOTEST	5.31859	3.35884	-0.663078	0	1	1	no
CAETHG_1087	CP006763:1177725-1178334	'ABRINI_FRU'	'ABRINI_RMG'	OK	4.69476	0.698554	-2.74861	-2.21107	0.0492	0.0791853	no
CAETHG_1088	CP006763:1178612-1180181	'ABRINI_FRU'	'ABRINI_RMG'	OK	32.5697	66.4032	1.02772	2.38633	0.00015	0.000427948	yes
CAETHG_1089	CP006763:1180324-1180552	'ABRINI_FRU'	'ABRINI_RMG'	OK	26.5406	58.5682	1.14191	4.09291	0.0201	0.0360424	yes
CAETHG_1090	CP006763:1180724-1181186	'ABRINI_FRU'	'ABRINI_RMG'	OK	74.9365	94.6816	0.337416	1.06903	0.22225	0.289625	no
CAETHG_1091	CP006763:1181362-1181890	'ABRINI_FRU'	'ABRINI_RMG'	OK	3.07005	2.34238	-0.390288	-0.412043	0.58635	0.654168	no
CAETHG_1092	CP006763:1182554-1182776	'ABRINI_FRU'	'ABRINI_RMG'	OK	19.9975	14.4739	-0.466367	-1.27083	0.5157	0.589452	no
CAETHG_1093	CP006763:1182879-1183053	'ABRINI_FRU'	'ABRINI_RMG'	OK	46.949	16.3814	-1.51903	-6.01027	0.1083	0.157127	no
CAETHG_1094	CP006763:1183311-1183914	'ABRINI_FRU'	'ABRINI_RMG'	OK	87.6371	63.9825	-0.453863	-2.23723	0.12155	0.173671	no
CAETHG_1095	CP006763:1183932-1184391	'ABRINI_FRU'	'ABRINI_RMG'	OK	42.3607	39.8618	-0.08772	-0.378172	0.7979	0.838705	no
CAETHG_1096	CP006763:1184426-1184837	'ABRINI_FRU'	'ABRINI_RMG'	OK	156.89	34.6045	-2.18072	-8.03512	5e-05	0.00015337	yes
CAETHG_1097	CP006763:1185111-1185414	'ABRINI_FRU'	'ABRINI_RMG'	OK	4.5116	5.07159	0.168798	0.246961	0.85975	0.889052	no
CAETHG_1098	CP006763:1185548-1186040	'ABRINI_FRU'	'ABRINI_RMG'	OK	21.2912	21.5393	0.0167084	0.0383468	0.96385	0.971644	no
CAETHG_1099	CP006763:1186320-1186470	'ABRINI_FRU'	'ABRINI_RMG'	NOTEST	0	8.90328	inf	0	1	1	no
CAETHG_1100	CP006763:1186842-1187643	'ABRINI_FRU'	'ABRINI_RMG'	NOTEST	0	0	0	0	1	1	no
CAETHG_1101	CP006763:1187684-1188263	'ABRINI_FRU'	'ABRINI_RMG'	NOTEST	0	0	0	0	1	1	no
CAETHG_1102	CP006763:1188702-1189464	'ABRINI_FRU'	'ABRINI_RMG'	OK	39.0653	24.9176	-0.648723	-2.06716	0.0345	0.0581541	no
CAETHG_1103	CP006763:1190504-1190690	'ABRINI_FRU'	'ABRINI_RMG'	OK	16.4548	289.077	4.13488	16.1624	0.0004	0.001059	yes
CAETHG_1104	CP006763:1191065-1191731	'ABRINI_FRU'	'ABRINI_RMG'	OK	90.2729	33.3826	-1.4352	-4.84296	5e-05	0.00015337	yes
CAETHG_1105	CP006763:1191910-1192099	'ABRINI_FRU'	'ABRINI_RMG'	OK	54.546	16.1193	-1.75869	-5.89026	0.02645	0.045942	yes
CAETHG_1106	CP006763:1192236-1192599	'ABRINI_FRU'	'ABRINI_RMG'	OK	39.2659	19.4917	-1.01042	-2.97211	0.014	0.0261466	yes
CAETHG_1107	CP006763:1192764-1192884	'ABRINI_FRU'	'ABRINI_RMG'	NOTEST	0	0	0	0	1	1	no
CAETHG_1108	CP006763:1193788-1194454	'ABRINI_FRU'	'ABRINI_RMG'	OK	11.6692	3.11676	-1.90459	-3.33923	0.00565	0.0116756	yes
CAETHG_1109	CP006763:1194473-1195268	'ABRINI_FRU'	'ABRINI_RMG'	OK	6.1668	3.22691	-0.934371	-1.47229	0.06595	0.102241	no
CAETHG_1110	CP006763:1195680-1196196	'ABRINI_FRU'	'ABRINI_RMG'	OK	655.151	1424.22	1.12027	3.50485	5e-05	0.00015337	yes
CAETHG_1111	CP006763:1196333-1197191	'ABRINI_FRU'	'ABRINI_RMG'	OK	62.081	17.0244	-1.86655	-5.01633	5e-05	0.00015337	yes
CAETHG_1112	CP006763:1197203-1197980	'ABRINI_FRU'	'ABRINI_RMG'	OK	107.48	60.8916	-0.819746	-2.18895	0.00265	0.00589009	yes
CAETHG_1113	CP006763:1197992-1198817	'ABRINI_FRU'	'ABRINI_RMG'	OK	127.253	96.8963	-0.393189	-0.946177	0.131	0.184734	no
CAETHG_1114	CP006763:1198851-1199574	'ABRINI_FRU'	'ABRINI_RMG'	OK	127.245	150.885	0.245845	0.628674	0.34795	0.423141	no
CAETHG_1115	CP006763:1199604-1201378	'ABRINI_FRU'	'ABRINI_RMG'	OK	655.542	2573.85	1.97317	3.62501	5e-05	0.00015337	yes
CAETHG_1116	CP006763:1199604-1201378	'ABRINI_FRU'	'ABRINI_RMG'	OK	127.328	123.331	-0.0460108	-0.0155268	0.9696	0.975725	no
CAETHG_1117	CP006763:1201390-1202077	'ABRINI_FRU'	'ABRINI_RMG'	OK	153.037	57.8306	-1.40397	-3.35011	5e-05	0.00015337	yes
CAETHG_1118	CP006763:1202235-1202802	'ABRINI_FRU'	'ABRINI_RMG'	OK	158.4	92.38	-0.777919	-2.03516	0.0032	0.00698664	yes
CAETHG_1119	CP006763:1202819-1203437	'ABRINI_FRU'	'ABRINI_RMG'	OK	122.48	71.4412	-0.777718	-2.00892	0.00375	0.00805106	yes
CAETHG_1120	CP006763:1203459-1204542	'ABRINI_FRU'	'ABRINI_RMG'	OK	141.503	120.414	-0.232826	-0.505281	0.36545	0.441241	no
CAETHG_1121	CP006763:1204567-1205188	'ABRINI_FRU'	'ABRINI_RMG'	OK	114.477	164.599	0.523895	1.30354	0.0442	0.0722122	no
CAETHG_1122	CP006763:1205226-1206303	'ABRINI_FRU'	'ABRINI_RMG'	OK	133.145	157.925	0.246242	0.565486	0.33525	0.41	no
CAETHG_1123	CP006763:1206409-1207744	'ABRINI_FRU'	'ABRINI_RMG'	OK	195.091	216.837	0.152462	0.340865	0.5506	0.621661	no
CAETHG_1124	CP006763:1207767-1208742	'ABRINI_FRU'	'ABRINI_RMG'	OK	174.892	306.778	0.810732	1.90634	0.00125	0.00298859	yes
CAETHG_1125	CP006763:1208747-1210208	'ABRINI_FRU'	'ABRINI_RMG'	OK	131.969	251.204	0.928656	1.97561	0.0004	0.001059	yes
CAETHG_1126	CP006763:1210218-1211750	'ABRINI_FRU'	'ABRINI_RMG'	OK	176.291	214.9	0.285707	0.601122	0.32625	0.400617	no
CAETHG_1127	CP006763:1210218-1211750	'ABRINI_FRU'	'ABRINI_RMG'	OK	83.3926	112.609	0.433328	0.465817	0.4337	0.510374	no
CAETHG_1128	CP006763:1211771-1213010	'ABRINI_FRU'	'ABRINI_RMG'	OK	135.49	173.978	0.360721	1.08777	0.15755	0.215935	no
CAETHG_1129	CP006763:1213042-1214017	'ABRINI_FRU'	'ABRINI_RMG'	OK	125.136	162.28	0.374987	0.898471	0.14135	0.197123	no
CAETHG_1130	CP006763:1214046-1215564	'ABRINI_FRU'	'ABRINI_RMG'	OK	201.873	251.992	0.319927	0.68489	0.22225	0.289625	no
CAETHG_1131	CP006763:1216024-1217553	'ABRINI_FRU'	'ABRINI_RMG'	OK	217.001	72.1203	-1.58922	-2.70022	5e-05	0.00015337	yes
CAETHG_1132	CP006763:1216024-1217553	'ABRINI_FRU'	'ABRINI_RMG'	OK	245.836	173.082	-0.50624	-1.20732	0.16655	0.226323	no
CAETHG_1133	CP006763:1217653-1219650	'ABRINI_FRU'	'ABRINI_RMG'	OK	85.8752	64.992	-0.401979	-0.571151	0.4867	0.562244	no
CAETHG_1134	CP006763:1217653-1219650	'ABRINI_FRU'	'ABRINI_RMG'	OK	86.246	90.1885	0.0644852	0.134841	0.8205	0.857666	no
CAETHG_1135	CP006763:1219854-1222017	'ABRINI_FRU'	'ABRINI_RMG'	OK	32.4973	11.8257	-1.4584	-3.58203	5e-05	0.00015337	yes
CAETHG_1136	CP006763:1222068-1224228	'ABRINI_FRU'	'ABRINI_RMG'	OK	22.6241	11.7527	-0.94487	-2.4869	0.00085	0.00209829	yes
CAETHG_1137	CP006763:1224393-1225425	'ABRINI_FRU'	'ABRINI_RMG'	OK	53.0616	59.6185	0.168093	0.476813	0.52265	0.596089	no
CAETHG_1138	CP006763:1225948-1226770	'ABRINI_FRU'	'ABRINI_RMG'	OK	130.649	49.6987	-1.39441	-3.52184	5e-05	0.00015337	yes
CAETHG_1139	CP006763:1227262-1228153	'ABRINI_FRU'	'ABRINI_RMG'	OK	172.922	142.712	-0.277013	-0.703593	0.27525	0.346069	no
CAETHG_1140	CP006763:1228318-1229485	'ABRINI_FRU'	'ABRINI_RMG'	OK	63.2695	40.3364	-0.649426	-1.49991	0.0126	0.0238071	yes
CAETHG_1141	CP006763:1230004-1231066	'ABRINI_FRU'	'ABRINI_RMG'	OK	31.4634	45.2944	0.525658	1.17841	0.04955	0.0796704	no
CAETHG_1142	CP006763:1231089-1231362	'ABRINI_FRU'	'ABRINI_RMG'	OK	13.9214	4.39763	-1.6625	-2.66999	0.06355	0.0990831	no
CAETHG_1143	CP006763:1231466-1233944	'ABRINI_FRU'	'ABRINI_RMG'	OK	18.6494	13.5035	-0.465799	-1.01506	0.08155	0.122373	no
CAETHG_1144	CP006763:1234094-1234601	'ABRINI_FRU'	'ABRINI_RMG'	OK	20.1554	23.4212	0.216645	0.516701	0.52395	0.597156	no
CAETHG_1145	CP006763:1234677-1235397	'ABRINI_FRU'	'ABRINI_RMG'	OK	51.2487	19.3028	-1.4087	-3.79939	5e-05	0.00015337	yes
CAETHG_1146	CP006763:1236005-1236578	'ABRINI_FRU'	'ABRINI_RMG'	OK	203.627	550.041	1.43361	4.29846	5e-05	0.00015337	yes
CAETHG_1147	CP006763:1236748-1237729	'ABRINI_FRU'	'ABRINI_RMG'	OK	107.741	71.8415	-0.584674	-1.46962	0.02425	0.042533	yes
CAETHG_1148	CP006763:1237849-1238077	'ABRINI_FRU'	'ABRINI_RMG'	OK	28.6081	5.40419	-2.40427	-4.69672	0.034	0.0573956	no
CAETHG_1149	CP006763:1238469-1239225	'ABRINI_FRU'	'ABRINI_RMG'	OK	23.4533	41.5846	0.826256	2.04691	0.0049	0.0102682	yes
CAETHG_1150	CP006763:1239280-1239892	'ABRINI_FRU'	'ABRINI_RMG'	OK	19.2046	22.9642	0.257937	0.637293	0.42855	0.505572	no
CAETHG_1151	CP006763:1240085-1241306	'ABRINI_FRU'	'ABRINI_RMG'	OK	161.694	208.095	0.363982	1.11256	0.1628	0.222095	no
CAETHG_1152	CP006763:1241351-1241912	'ABRINI_FRU'	'ABRINI_RMG'	OK	21.1964	32.4432	0.614096	1.67947	0.0648	0.100717	no
CAETHG_1153	CP006763:1242294-1242651	'ABRINI_FRU'	'ABRINI_RMG'	OK	150.603	179.069	0.249767	1.10958	0.3625	0.438048	no
CAETHG_1154	CP006763:1242739-1243156	'ABRINI_FRU'	'ABRINI_RMG'	OK	104.137	168.071	0.690587	2.64173	0.01285	0.0242236	yes
CAETHG_1155	CP006763:1243215-1243728	'ABRINI_FRU'	'ABRINI_RMG'	OK	27.3627	39.2122	0.519094	1.5849	0.1162	0.167214	no
CAETHG_1156	CP006763:1244012-1244309	'ABRINI_FRU'	'ABRINI_RMG'	OK	101.486	307.824	1.60082	7.66834	5e-05	0.00015337	yes
CAETHG_1157	CP006763:1244525-1244696	'ABRINI_FRU'	'ABRINI_RMG'	OK	1019.81	930.274	-0.132569	-1.23847	0.62095	0.684776	no
CAETHG_1158	CP006763:1245461-1245858	'ABRINI_FRU'	'ABRINI_RMG'	OK	268.297	18.3666	-3.86868	-11.6473	0.11975	0.171505	no
CAETHG_1159	CP006763:1245461-1245858	'ABRINI_FRU'	'ABRINI_RMG'	OK	217.379	31.557	-2.78418	-4.25922	5e-05	0.00015337	yes
CAETHG_1160	CP006763:1246791-1247031	'ABRINI_FRU'	'ABRINI_RMG'	OK	4.03019	5.72867	0.507351	0.670093	0.6372	0.699268	no
CAETHG_1161	CP006763:1247153-1247438	'ABRINI_FRU'	'ABRINI_RMG'	OK	10.2553	0.610234	-4.07086	-2.41339	0.22515	0.29244	no
CAETHG_1162	CP006763:1247549-1247990	'ABRINI_FRU'	'ABRINI_RMG'	OK	7.49603	1.5834	-2.2431	-2.34847	0.03965	0.065497	no
CAETHG_1163	CP006763:1248074-1248503	'ABRINI_FRU'	'ABRINI_RMG'	OK	14.6883	3.2288	-2.1856	-3.50054	0.01005	0.019457	yes
CAETHG_1164	CP006763:1248543-1249314	'ABRINI_FRU'	'ABRINI_RMG'	OK	14.1478	2.6049	-2.44128	-4.18314	0.00095	0.00232215	yes
CAETHG_1165	CP006763:1249805-1250138	'ABRINI_FRU'	'ABRINI_RMG'	OK	42.3483	8.35564	-2.34148	-6.06281	0.0017	0.00393011	yes
CAETHG_1166	CP006763:1250354-1250519	'ABRINI_FRU'	'ABRINI_RMG'	OK	63.0704	170.377	1.43369	8.91333	0.00435	0.00919973	yes
CAETHG_1167	CP006763:1250602-1250827	'ABRINI_FRU'	'ABRINI_RMG'	OK	147.603	840.864	2.51015	15.5239	5e-05	0.00015337	yes
CAETHG_1168	CP006763:1250861-1251029	'ABRINI_FRU'	'ABRINI_RMG'	OK	25.0422	149.116	2.57401	11.897	0.00255	0.00568545	yes
CAETHG_1169	CP006763:1251134-1251434	'ABRINI_FRU'	'ABRINI_RMG'	NOTEST	1.05672	1.87639	0.82837	0	1	1	no
CAETHG_1170	CP006763:1252133-1253033	'ABRINI_FRU'	'ABRINI_RMG'	OK	146.171	64.2812	-1.18519	-3.54034	5e-05	0.00015337	yes
CAETHG_1171	CP006763:1253747-1254050	'ABRINI_FRU'	'ABRINI_RMG'	OK	5.24125	0.918588	-2.51242	-1.86169	0.1911	0.254438	no
CAETHG_1172	CP006763:1254098-1254638	'ABRINI_FRU'	'ABRINI_RMG'	OK	3.06472	0.412844	-2.89209	-1.72297	0.12845	0.181517	no
CAETHG_1173	CP006763:1255195-1256227	'ABRINI_FRU'	'ABRINI_RMG'	OK	31.5919	46.2915	0.551195	1.32478	0.0412	0.0678327	no
CAETHG_1174	CP006763:1256326-1256968	'ABRINI_FRU'	'ABRINI_RMG'	OK	20.8147	21.8055	0.0670891	0.167113	0.84155	0.87441	no
CAETHG_1175	CP006763:1257110-1257476	'ABRINI_FRU'	'ABRINI_RMG'	OK	50.1881	51.7756	0.0449258	0.149958	0.8909	0.915403	no
CAETHG_1176	CP006763:1257581-1258523	'ABRINI_FRU'	'ABRINI_RMG'	OK	22.2599	46.8739	1.07434	2.49264	5e-05	0.00015337	yes
CAETHG_1177	CP006763:1258529-1259972	'ABRINI_FRU'	'ABRINI_RMG'	OK	13.7252	18.3937	0.422379	0.98057	0.13965	0.194966	no
CAETHG_1178	CP006763:1260365-1260948	'ABRINI_FRU'	'ABRINI_RMG'	OK	16.9608	13.2669	-0.354372	-0.486004	0.5958	0.662456	no
CAETHG_1179	CP006763:1260365-1260948	'ABRINI_FRU'	'ABRINI_RMG'	OK	161.443	180.41	0.16025	0.264558	0.64245	0.703951	no
CAETHG_1180	CP006763:1261336-1261762	'ABRINI_FRU'	'ABRINI_RMG'	OK	588.222	379.993	-0.630388	-2.78909	0.01465	0.0271966	yes
CAETHG_1181	CP006763:1261938-1263087	'ABRINI_FRU'	'ABRINI_RMG'	OK	8.89311	1.61949	-2.45714	-3.66124	0.0002	0.000558102	yes
CAETHG_1182	CP006763:1263342-1264914	'ABRINI_FRU'	'ABRINI_RMG'	OK	10.3564	18.6752	0.850598	1.84156	0.00275	0.00608171	yes
CAETHG_1183	CP006763:1264936-1265479	'ABRINI_FRU'	'ABRINI_RMG'	OK	4.51027	9.60793	1.09101	1.75525	0.03845	0.0638089	no
CAETHG_1184	CP006763:1265501-1267141	'ABRINI_FRU'	'ABRINI_RMG'	NOTEST	1.21801	0	#NAME?	0	1	1	no
CAETHG_1185	CP006763:1265501-1267141	'ABRINI_FRU'	'ABRINI_RMG'	OK	5.23444	11.5375	1.14023	1.81274	0.0014	0.00330587	yes
CAETHG_1186	CP006763:1267343-1268987	'ABRINI_FRU'	'ABRINI_RMG'	OK	17.0792	28.4222	0.734779	1.59751	0.0079	0.0156865	yes
CAETHG_1187	CP006763:1269553-1270936	'ABRINI_FRU'	'ABRINI_RMG'	OK	83.1118	17.6711	-2.23366	-6.36033	5e-05	0.00015337	yes
CAETHG_1188	CP006763:1271062-1271677	'ABRINI_FRU'	'ABRINI_RMG'	OK	23.305	40.7788	0.807182	2.66191	0.01425	0.0265357	yes
CAETHG_1189	CP006763:1271731-1272691	'ABRINI_FRU'	'ABRINI_RMG'	OK	12.9351	27.0114	1.06228	2.3504	0.00055	0.00141656	yes
CAETHG_1190	CP006763:1272695-1273686	'ABRINI_FRU'	'ABRINI_RMG'	OK	14.376	29.2539	1.02497	2.22191	0.00905	0.0176973	yes
CAETHG_1191	CP006763:1272695-1273686	'ABRINI_FRU'	'ABRINI_RMG'	OK	25.7889	28.629	0.150727	0.171634	0.79025	0.831731	no
CAETHG_1192	CP006763:1273879-1274464	'ABRINI_FRU'	'ABRINI_RMG'	OK	159.531	474.754	1.57334	3.96477	5e-05	0.00015337	yes
CAETHG_1193	CP006763:1274629-1274980	'ABRINI_FRU'	'ABRINI_RMG'	OK	307.99	374.356	0.281529	1.36033	0.2937	0.366096	no
CAETHG_1194	CP006763:1275015-1277161	'ABRINI_FRU'	'ABRINI_RMG'	OK	80.8396	41.7514	-0.953238	-2.12962	0.00055	0.00141656	yes
CAETHG_1195	CP006763:1275015-1277161	'ABRINI_FRU'	'ABRINI_RMG'	OK	29.6581	12.4642	-1.25063	-0.857334	0.126	0.178627	no
CAETHG_1196	CP006763:1277212-1278466	'ABRINI_FRU'	'ABRINI_RMG'	OK	6.70201	6.15885	-0.121933	-0.264389	0.74015	0.78936	no
CAETHG_1197	CP006763:1278643-1280434	'ABRINI_FRU'	'ABRINI_RMG'	OK	16.0067	5.80304	-1.46379	-2.24664	0.01295	0.0243881	yes
CAETHG_1198	CP006763:1278643-1280434	'ABRINI_FRU'	'ABRINI_RMG'	OK	8.89042	3.65557	-1.28215	-1.49178	0.02455	0.0430066	yes
CAETHG_1199	CP006763:1280438-1281176	'ABRINI_FRU'	'ABRINI_RMG'	OK	7.69767	1.58103	-2.28355	-2.76447	0.00535	0.0111178	yes
CAETHG_1200	CP006763:1281193-1282216	'ABRINI_FRU'	'ABRINI_RMG'	OK	5.77413	0.656588	-3.13654	-2.90117	0.00685	0.0138339	yes
CAETHG_1201	CP006763:1282427-1282841	'ABRINI_FRU'	'ABRINI_RMG'	OK	124.26	164.221	0.402274	1.5091	0.13785	0.192758	no
CAETHG_1202	CP006763:1283293-1284097	'ABRINI_FRU'	'ABRINI_RMG'	OK	7.09558	9.27188	0.385941	0.696047	0.3004	0.372826	no
CAETHG_1203	CP006763:1284127-1285539	'ABRINI_FRU'	'ABRINI_RMG'	OK	7.3742	8.62684	0.226346	0.328593	0.5861	0.653953	no
CAETHG_1204	CP006763:1284127-1285539	'ABRINI_FRU'	'ABRINI_RMG'	OK	5.32801	8.22349	0.626154	0.556946	0.285	0.356608	no
CAETHG_1205	CP006763:1285572-1286817	'ABRINI_FRU'	'ABRINI_RMG'	OK	10.447	7.44322	-0.489095	-0.923174	0.12485	0.177392	no
CAETHG_1206	CP006763:1286957-1288006	'ABRINI_FRU'	'ABRINI_RMG'	OK	10.6555	0.147058	-6.17907	-1.96474	0.16725	0.227112	no
CAETHG_1207	CP006763:1286957-1288006	'ABRINI_FRU'	'ABRINI_RMG'	OK	27.2799	3.53996	-2.94604	-2.49756	0.00405	0.00863052	yes
CAETHG_1208	CP006763:1288183-1289554	'ABRINI_FRU'	'ABRINI_RMG'	OK	3.5999	1.86688	-0.94733	-1.34336	0.0463	0.0752785	no
CAETHG_1209	CP006763:1289893-1290388	'ABRINI_FRU'	'ABRINI_RMG'	OK	52.8793	7.66948	-2.7855	-6.56696	5e-05	0.00015337	yes
CAETHG_1210	CP006763:1290735-1291695	'ABRINI_FRU'	'ABRINI_RMG'	OK	76.3117	34.8423	-1.13107	-3.21695	5e-05	0.00015337	yes
CAETHG_1211	CP006763:1292182-1292989	'ABRINI_FRU'	'ABRINI_RMG'	OK	667.055	602.454	-0.146954	-0.366906	0.5754	0.643893	no
CAETHG_1212	CP006763:1293009-1293648	'ABRINI_FRU'	'ABRINI_RMG'	OK	306.299	290.129	-0.0782481	-0.233556	0.76095	0.806518	no
CAETHG_1213	CP006763:1293666-1293789	'ABRINI_FRU'	'ABRINI_RMG'	NOTEST	10.0435	0	#NAME?	0	1	1	no
CAETHG_1214	CP006763:1293982-1295695	'ABRINI_FRU'	'ABRINI_RMG'	OK	29.0116	77.542	1.41835	4.54467	5e-05	0.00015337	yes
CAETHG_1215	CP006763:1296112-1299835	'ABRINI_FRU'	'ABRINI_RMG'	OK	74.1621	144.931	0.966609	2.14147	0.00035	0.000934175	yes
CAETHG_1216	CP006763:1299950-1301015	'ABRINI_FRU'	'ABRINI_RMG'	OK	184.721	143.889	-0.360396	-1.09865	0.15545	0.213644	no
CAETHG_1217	CP006763:1301388-1302879	'ABRINI_FRU'	'ABRINI_RMG'	OK	250.346	237.43	-0.0764229	-0.188647	0.7707	0.814894	no
CAETHG_1218	CP006763:1303389-1304541	'ABRINI_FRU'	'ABRINI_RMG'	OK	131.263	138.248	0.0747931	0.166587	0.7669	0.811378	no
CAETHG_1219	CP006763:1304818-1305817	'ABRINI_FRU'	'ABRINI_RMG'	OK	118.044	283.925	1.26619	2.92055	5e-05	0.00015337	yes
CAETHG_1220	CP006763:1306098-1308005	'ABRINI_FRU'	'ABRINI_RMG'	OK	133.225	219.056	0.71744	1.76491	0.0101	0.019534	yes
CAETHG_1221	CP006763:1306098-1308005	'ABRINI_FRU'	'ABRINI_RMG'	OK	26.6664	25.86	-0.0442969	-0.0412417	0.94945	0.961098	no
CAETHG_1222	CP006763:1308170-1308689	'ABRINI_FRU'	'ABRINI_RMG'	OK	22.6512	10.5358	-1.10429	-2.90463	0.01325	0.0249122	yes
CAETHG_1223	CP006763:1309139-1309343	'ABRINI_FRU'	'ABRINI_RMG'	OK	3300.22	94.4919	-5.12623	-35.1149	5e-05	0.00015337	yes
CAETHG_1224	CP006763:1309472-1310345	'ABRINI_FRU'	'ABRINI_RMG'	OK	23.4948	19.1976	-0.291412	-0.556697	0.3079	0.38098	no
CAETHG_1225	CP006763:1310348-1311032	'ABRINI_FRU'	'ABRINI_RMG'	OK	18.4957	14.0527	-0.396347	-0.770004	0.221	0.288258	no
CAETHG_1226	CP006763:1311220-1312852	'ABRINI_FRU'	'ABRINI_RMG'	OK	11.2063	7.73285	-0.535243	-1.08896	0.08	0.120394	no
CAETHG_1227	CP006763:1312977-1314285	'ABRINI_FRU'	'ABRINI_RMG'	OK	42.9131	22.1958	-0.95113	-2.45156	0.0007	0.00176059	yes
CAETHG_1228	CP006763:1314355-1314787	'ABRINI_FRU'	'ABRINI_RMG'	OK	51.5879	24.7037	-1.0623	-3.69097	0.004	0.00853348	yes
CAETHG_1229	CP006763:1314809-1315682	'ABRINI_FRU'	'ABRINI_RMG'	OK	76.5421	30.103	-1.34635	-3.26681	5e-05	0.00015337	yes
CAETHG_1230	CP006763:1315813-1316650	'ABRINI_FRU'	'ABRINI_RMG'	OK	43.9194	69.5577	0.663353	1.51852	0.01305	0.0245603	yes
CAETHG_1231	CP006763:1316653-1317040	'ABRINI_FRU'	'ABRINI_RMG'	OK	91.949	178.756	0.959084	3.18438	0.00085	0.00209829	yes
CAETHG_1232	CP006763:1317354-1319511	'ABRINI_FRU'	'ABRINI_RMG'	OK	38.1548	46.73	0.292485	0.717642	0.26025	0.329704	no
CAETHG_1233	CP006763:1319599-1319692	'ABRINI_FRU'	'ABRINI_RMG'	NOTEST	0	0	0	0	1	1	no
CAETHG_1234	CP006763:1319715-1320078	'ABRINI_FRU'	'ABRINI_RMG'	OK	50.8998	66.2398	0.380039	1.04757	0.2012	0.266278	no
CAETHG_1235	CP006763:1320094-1320697	'ABRINI_FRU'	'ABRINI_RMG'	OK	17.4295	38.4609	1.14186	3.57863	0.0013	0.00309394	yes
CAETHG_1236	CP006763:1320844-1321204	'ABRINI_FRU'	'ABRINI_RMG'	OK	162.816	948.533	2.54246	10.4464	5e-05	0.00015337	yes
CAETHG_1237	CP006763:1321355-1322168	'ABRINI_FRU'	'ABRINI_RMG'	OK	46.666	38.5521	-0.275563	-0.745156	0.3229	0.397056	no
CAETHG_1238	CP006763:1322168-1323137	'ABRINI_FRU'	'ABRINI_RMG'	OK	165.845	598.984	1.85268	4.83613	5e-05	0.00015337	yes
CAETHG_1239	CP006763:1323381-1323858	'ABRINI_FRU'	'ABRINI_RMG'	OK	147.408	80.6142	-0.87071	-2.60955	0.0019	0.00434432	yes
CAETHG_1240	CP006763:1324256-1324454	'ABRINI_FRU'	'ABRINI_RMG'	OK	26.9881	59.2335	1.13409	4.46224	0.04725	0.0766059	no
CAETHG_1241	CP006763:1324504-1324759	'ABRINI_FRU'	'ABRINI_RMG'	OK	65.545	88.7804	0.437757	1.96486	0.20635	0.272057	no
CAETHG_1242	CP006763:1324771-1325344	'ABRINI_FRU'	'ABRINI_RMG'	OK	48.1252	72.2516	0.586235	1.4783	0.03385	0.0572014	no
CAETHG_1243	CP006763:1325612-1326587	'ABRINI_FRU'	'ABRINI_RMG'	OK	32.1831	24.8747	-0.371627	-0.879154	0.18385	0.246415	no
CAETHG_1244	CP006763:1326892-1327345	'ABRINI_FRU'	'ABRINI_RMG'	OK	11.6876	3.82926	-1.60984	-2.69399	0.023	0.0405951	yes
CAETHG_1245	CP006763:1327346-1328150	'ABRINI_FRU'	'ABRINI_RMG'	OK	18.6795	6.02828	-1.63164	-3.01193	0.00015	0.000427948	yes
CAETHG_1246	CP006763:1328192-1329509	'ABRINI_FRU'	'ABRINI_RMG'	OK	8.01573	2.08844	-1.94041	-2.69854	0.0001	0.00029355	yes
CAETHG_1247	CP006763:1329788-1331792	'ABRINI_FRU'	'ABRINI_RMG'	OK	3.19081	2.17577	-0.552394	-0.785017	0.14045	0.195987	no
CAETHG_1248	CP006763:1331856-1333551	'ABRINI_FRU'	'ABRINI_RMG'	OK	92.321	268.362	1.53945	3.8601	5e-05	0.00015337	yes
CAETHG_1249	CP006763:1333805-1335116	'ABRINI_FRU'	'ABRINI_RMG'	OK	77.3736	109.757	0.504398	1.33522	0.05295	0.0843567	no
CAETHG_1250	CP006763:1335386-1336112	'ABRINI_FRU'	'ABRINI_RMG'	OK	138.516	98.6606	-0.489502	-1.35235	0.0629	0.0981497	no
CAETHG_1251	CP006763:1336172-1338369	'ABRINI_FRU'	'ABRINI_RMG'	OK	463.261	640.767	0.467976	0.952781	0.14675	0.203516	no
CAETHG_1252	CP006763:1336172-1338369	'ABRINI_FRU'	'ABRINI_RMG'	OK	165.229	134.657	-0.295181	-0.287592	0.60505	0.67066	no
CAETHG_1253	CP006763:1339096-1339357	'ABRINI_FRU'	'ABRINI_RMG'	OK	456.427	157.33	-1.53659	-7.85004	5e-05	0.00015337	yes
CAETHG_1254	CP006763:1339377-1339584	'ABRINI_FRU'	'ABRINI_RMG'	OK	57.7019	11.9188	-2.27538	-7.01937	0.0121	0.0229608	yes
CAETHG_1255	CP006763:1339800-1341366	'ABRINI_FRU'	'ABRINI_RMG'	OK	6.92648	5.21902	-0.408343	-0.806539	0.227	0.294343	no
CAETHG_1256	CP006763:1341430-1342468	'ABRINI_FRU'	'ABRINI_RMG'	OK	5.4086	1.41871	-1.93068	-2.55439	0.0058	0.0119383	yes
CAETHG_1257	CP006763:1342782-1343370	'ABRINI_FRU'	'ABRINI_RMG'	OK	34.2536	25.8141	-0.408099	-1.0216	0.1877	0.250405	no
CAETHG_1258	CP006763:1343389-1344013	'ABRINI_FRU'	'ABRINI_RMG'	OK	89.6892	87.5511	-0.0348089	-0.0983557	0.89895	0.920952	no
CAETHG_1259	CP006763:1344037-1346668	'ABRINI_FRU'	'ABRINI_RMG'	OK	89.8419	83.7682	-0.100986	-0.247339	0.6978	0.753301	no
CAETHG_1260	CP006763:1346993-1347644	'ABRINI_FRU'	'ABRINI_RMG'	OK	67.7591	42.9762	-0.656876	-2.20622	0.027	0.0468122	yes
CAETHG_1261	CP006763:1347756-1348293	'ABRINI_FRU'	'ABRINI_RMG'	OK	40.2411	29.1461	-0.46537	-1.52268	0.15045	0.207793	no
CAETHG_1262	CP006763:1348687-1349326	'ABRINI_FRU'	'ABRINI_RMG'	OK	98.2678	117.371	0.256283	0.682611	0.34235	0.417171	no
CAETHG_1263	CP006763:1349519-1350188	'ABRINI_FRU'	'ABRINI_RMG'	OK	113.215	41.3454	-1.45327	-5.73822	5e-05	0.00015337	yes
CAETHG_1264	CP006763:1350421-1352194	'ABRINI_FRU'	'ABRINI_RMG'	OK	182.685	252.023	0.464203	0.977216	0.08015	0.120588	no
CAETHG_1265	CP006763:1352209-1353460	'ABRINI_FRU'	'ABRINI_RMG'	OK	113.274	82.7092	-0.453693	-1.06609	0.07365	0.112207	no
CAETHG_1266	CP006763:1353538-1354987	'ABRINI_FRU'	'ABRINI_RMG'	OK	61.3137	30.1211	-1.02543	-2.63445	0.00015	0.000427948	yes
CAETHG_1267	CP006763:1355504-1356104	'ABRINI_FRU'	'ABRINI_RMG'	OK	204.58	373.517	0.868511	2.44811	0.0006	0.00153329	yes
CAETHG_1268	CP006763:1356140-1356590	'ABRINI_FRU'	'ABRINI_RMG'	OK	114.956	144.665	0.331635	1.04553	0.2212	0.288453	no
CAETHG_1269	CP006763:1356604-1358782	'ABRINI_FRU'	'ABRINI_RMG'	OK	88.9903	130.226	0.549297	1.21056	0.03335	0.0565146	no
CAETHG_1270	CP006763:1358888-1359437	'ABRINI_FRU'	'ABRINI_RMG'	OK	149.445	341.596	1.19268	3.2141	5e-05	0.00015337	yes
CAETHG_1271	CP006763:1359507-1360356	'ABRINI_FRU'	'ABRINI_RMG'	OK	36.3937	17.6769	-1.04182	-2.57013	0.0009	0.00221219	yes
CAETHG_1272	CP006763:1360514-1361390	'ABRINI_FRU'	'ABRINI_RMG'	OK	254.417	261.128	0.0375612	0.102677	0.8875	0.912973	no
CAETHG_1273	CP006763:1361391-1362666	'ABRINI_FRU'	'ABRINI_RMG'	OK	333.421	364.42	0.128255	0.276579	0.62735	0.690241	no
CAETHG_1274	CP006763:1362808-1364176	'ABRINI_FRU'	'ABRINI_RMG'	OK	164.603	102.634	-0.681484	-1.54431	0.0075	0.014983	yes
CAETHG_1275	CP006763:1364261-1364399	'ABRINI_FRU'	'ABRINI_RMG'	OK	5.91527	20.6215	1.80164	4.73518	0.4275	0.504631	no
CAETHG_1276	CP006763:1364497-1364866	'ABRINI_FRU'	'ABRINI_RMG'	OK	185.203	37.8574	-2.29046	-6.85707	5e-05	0.00015337	yes
CAETHG_1277	CP006763:1364919-1365252	'ABRINI_FRU'	'ABRINI_RMG'	OK	4166.89	4638.9	0.154813	0.562705	0.6231	0.686487	no
CAETHG_1278	CP006763:1365287-1366412	'ABRINI_FRU'	'ABRINI_RMG'	OK	108.315	60.2936	-0.845156	-1.88072	0.00105	0.00254597	yes
CAETHG_1279	CP006763:1366427-1367453	'ABRINI_FRU'	'ABRINI_RMG'	OK	88.0245	46.8208	-0.910755	-2.00082	0.00075	0.0018728	yes
CAETHG_1280	CP006763:1367481-1368528	'ABRINI_FRU'	'ABRINI_RMG'	OK	97.3487	47.0732	-1.04826	-2.24282	0.00015	0.000427948	yes
CAETHG_1281	CP006763:1368541-1369138	'ABRINI_FRU'	'ABRINI_RMG'	OK	157.46	33.0754	-2.25116	-5.63675	5e-05	0.00015337	yes
CAETHG_1282	CP006763:1369326-1369929	'ABRINI_FRU'	'ABRINI_RMG'	OK	71.9144	17.889	-2.00721	-5.53435	5e-05	0.00015337	yes
CAETHG_1283	CP006763:1369989-1370814	'ABRINI_FRU'	'ABRINI_RMG'	OK	7.46623	0.523785	-3.83333	-2.93818	0.01315	0.0247363	yes
CAETHG_1284	CP006763:1371106-1371925	'ABRINI_FRU'	'ABRINI_RMG'	OK	43.4225	10.1423	-2.09806	-5.70508	5e-05	0.00015337	yes
CAETHG_1285	CP006763:1372401-1373142	'ABRINI_FRU'	'ABRINI_RMG'	OK	180.305	68.7368	-1.39129	-3.2516	5e-05	0.00015337	yes
CAETHG_1286	CP006763:1373394-1374057	'ABRINI_FRU'	'ABRINI_RMG'	OK	43.8027	40.9404	-0.0974928	-0.276477	0.73715	0.786746	no
CAETHG_1287	CP006763:1374322-1375744	'ABRINI_FRU'	'ABRINI_RMG'	OK	57.0167	29.435	-0.953852	-2.36396	0.0002	0.000558102	yes
CAETHG_1288	CP006763:1375886-1376783	'ABRINI_FRU'	'ABRINI_RMG'	OK	98.1322	52.6559	-0.898133	-2.51742	0.0009	0.00221219	yes
CAETHG_1289	CP006763:1376938-1378726	'ABRINI_FRU'	'ABRINI_RMG'	OK	53.7069	13.1388	-2.03127	-4.18421	5e-05	0.00015337	yes
CAETHG_1290	CP006763:1379034-1379556	'ABRINI_FRU'	'ABRINI_RMG'	OK	172.187	24.0977	-2.83701	-8.37972	5e-05	0.00015337	yes
CAETHG_1291	CP006763:1379607-1380321	'ABRINI_FRU'	'ABRINI_RMG'	OK	19.4358	3.81227	-2.35	-4.10256	0.00015	0.000427948	yes
CAETHG_1292	CP006763:1380402-1382754	'ABRINI_FRU'	'ABRINI_RMG'	OK	126.053	74.7235	-0.754397	-1.78059	0.00375	0.00805106	yes
CAETHG_1293	CP006763:1382831-1383587	'ABRINI_FRU'	'ABRINI_RMG'	OK	585.722	155.904	-1.90955	-5.41784	5e-05	0.00015337	yes
CAETHG_1294	CP006763:1383596-1384025	'ABRINI_FRU'	'ABRINI_RMG'	OK	190.709	86.5885	-1.13913	-3.21177	5e-05	0.00015337	yes
CAETHG_1295	CP006763:1384039-1384375	'ABRINI_FRU'	'ABRINI_RMG'	OK	475.246	155.581	-1.61101	-6.34408	5e-05	0.00015337	yes
CAETHG_1296	CP006763:1384812-1386576	'ABRINI_FRU'	'ABRINI_RMG'	OK	18.8995	12.2636	-0.62396	-1.66422	0.0291	0.0500897	no
CAETHG_1297	CP006763:1386730-1387597	'ABRINI_FRU'	'ABRINI_RMG'	OK	17.9828	1.97419	-3.18729	-4.92679	5e-05	0.00015337	yes
CAETHG_1298	CP006763:1387732-1388146	'ABRINI_FRU'	'ABRINI_RMG'	OK	209.861	206.739	-0.0216217	-0.0810635	0.93605	0.9501	no
CAETHG_1299	CP006763:1388211-1388925	'ABRINI_FRU'	'ABRINI_RMG'	OK	182.359	239.202	0.391447	1.08962	0.12735	0.180296	no
CAETHG_1300	CP006763:1388926-1389580	'ABRINI_FRU'	'ABRINI_RMG'	OK	84.4633	30.368	-1.47577	-4.29009	5e-05	0.00015337	yes
CAETHG_1301	CP006763:1389685-1390693	'ABRINI_FRU'	'ABRINI_RMG'	OK	20.6133	4.52448	-2.18775	-5.42681	5e-05	0.00015337	yes
CAETHG_1302	CP006763:1390718-1392269	'ABRINI_FRU'	'ABRINI_RMG'	OK	41.4373	48.266	0.220076	0.613832	0.4046	0.481515	no
CAETHG_1303	CP006763:1392283-1393387	'ABRINI_FRU'	'ABRINI_RMG'	OK	49.208	37.6922	-0.384626	-0.827003	0.14795	0.204907	no
CAETHG_1304	CP006763:1393782-1395042	'ABRINI_FRU'	'ABRINI_RMG'	OK	59.1641	37.9754	-0.639657	-1.80492	0.01585	0.0291741	yes
CAETHG_1305	CP006763:1395076-1396129	'ABRINI_FRU'	'ABRINI_RMG'	OK	62.5678	33.3497	-0.907747	-2.11446	0.00055	0.00141656	yes
CAETHG_1306	CP006763:1396149-1396899	'ABRINI_FRU'	'ABRINI_RMG'	OK	45.9468	20.4858	-1.16534	-2.71579	0.00025	0.000685617	yes
CAETHG_1307	CP006763:1396967-1398071	'ABRINI_FRU'	'ABRINI_RMG'	OK	124.112	57.9155	-1.09962	-2.47132	5e-05	0.00015337	yes
CAETHG_1308	CP006763:1398100-1399417	'ABRINI_FRU'	'ABRINI_RMG'	OK	130.495	47.8254	-1.44814	-3.30587	5e-05	0.00015337	yes
CAETHG_1309	CP006763:1399498-1400704	'ABRINI_FRU'	'ABRINI_RMG'	OK	63.8818	21.5669	-1.56659	-3.74839	5e-05	0.00015337	yes
CAETHG_1310	CP006763:1400744-1402286	'ABRINI_FRU'	'ABRINI_RMG'	OK	96.4253	35.602	-1.43745	-3.48753	5e-05	0.00015337	yes
CAETHG_1311	CP006763:1402466-1403447	'ABRINI_FRU'	'ABRINI_RMG'	OK	60.1593	48.0109	-0.325426	-1.00147	0.2274	0.294728	no
CAETHG_1312	CP006763:1403498-1404788	'ABRINI_FRU'	'ABRINI_RMG'	OK	138.438	97.5229	-0.505428	-1.52416	0.0478	0.0772356	no
CAETHG_1313	CP006763:1404826-1405828	'ABRINI_FRU'	'ABRINI_RMG'	OK	147.218	60.7242	-1.2776	-3.45788	5e-05	0.00015337	yes
CAETHG_1314	CP006763:1405860-1406973	'ABRINI_FRU'	'ABRINI_RMG'	OK	109.715	47.1188	-1.21939	-3.3877	5e-05	0.00015337	yes
CAETHG_1315	CP006763:1406980-1408162	'ABRINI_FRU'	'ABRINI_RMG'	OK	176.449	81.8106	-1.10889	-2.7075	5e-05	0.00015337	yes
CAETHG_1316	CP006763:1408181-1408364	'ABRINI_FRU'	'ABRINI_RMG'	OK	188.911	121.931	-0.63164	-4.6352	0.09375	0.138577	no
CAETHG_1317	CP006763:1408396-1410019	'ABRINI_FRU'	'ABRINI_RMG'	OK	79.1877	45.4768	-0.800145	-1.77488	0.002	0.00455209	yes
CAETHG_1318	CP006763:1410258-1411176	'ABRINI_FRU'	'ABRINI_RMG'	OK	225.307	209.277	-0.106477	-0.219707	0.6767	0.734811	no
CAETHG_1319	CP006763:1411211-1412294	'ABRINI_FRU'	'ABRINI_RMG'	OK	150.591	66.01	-1.18988	-2.95496	5e-05	0.00015337	yes
CAETHG_1320	CP006763:1412317-1414045	'ABRINI_FRU'	'ABRINI_RMG'	OK	138.389	157.54	0.186986	0.39995	0.4675	0.543899	no
CAETHG_1321	CP006763:1414309-1415770	'ABRINI_FRU'	'ABRINI_RMG'	OK	16.6906	22.3353	0.420286	0.95421	0.13355	0.187592	no
CAETHG_1322	CP006763:1416090-1416648	'ABRINI_FRU'	'ABRINI_RMG'	OK	4.49548	11.9695	1.41282	2.63949	0.01525	0.0281828	yes
CAETHG_1323	CP006763:1416652-1417954	'ABRINI_FRU'	'ABRINI_RMG'	OK	6.16659	18.7415	1.6037	3.79884	5e-05	0.00015337	yes
CAETHG_1324	CP006763:1418097-1419081	'ABRINI_FRU'	'ABRINI_RMG'	OK	11.3345	11.2402	-0.0120514	-0.0325173	0.9679	0.974784	no
CAETHG_1325	CP006763:1419117-1419459	'ABRINI_FRU'	'ABRINI_RMG'	NOTEST	0.561775	2.00304	1.83412	0	1	1	no
CAETHG_1326	CP006763:1419880-1420309	'ABRINI_FRU'	'ABRINI_RMG'	OK	474.003	66.3504	-2.83672	-12.0167	5e-05	0.00015337	yes
CAETHG_1327	CP006763:1420432-1420714	'ABRINI_FRU'	'ABRINI_RMG'	NOTEST	2.0498	0	#NAME?	0	1	1	no
CAETHG_1328	CP006763:1420771-1420960	'ABRINI_FRU'	'ABRINI_RMG'	NOTEST	0	2.92505	inf	0	1	1	no
CAETHG_1329	CP006763:1421073-1422296	'ABRINI_FRU'	'ABRINI_RMG'	OK	3.55071	0.421606	-3.07414	-1.47157	0.20665	0.272328	no
CAETHG_1330	CP006763:1421073-1422296	'ABRINI_FRU'	'ABRINI_RMG'	OK	2.42036	1.02613	-1.23801	-0.904269	0.07895	0.119142	no
CAETHG_1331	CP006763:1422746-1423316	'ABRINI_FRU'	'ABRINI_RMG'	OK	48.9066	4.78939	-3.35211	-7.18552	5e-05	0.00015337	yes
CAETHG_1332	CP006763:1423740-1424718	'ABRINI_FRU'	'ABRINI_RMG'	OK	34.3162	5.54541	-2.62952	-6.30134	5e-05	0.00015337	yes
CAETHG_1333	CP006763:1424754-1425096	'ABRINI_FRU'	'ABRINI_RMG'	NOTEST	0.931034	1.4951	0.683332	0	1	1	no
CAETHG_1334	CP006763:1425305-1426616	'ABRINI_FRU'	'ABRINI_RMG'	OK	2.42148	2.51455	0.0544113	0.0783752	0.91335	0.93229	no
CAETHG_1335	CP006763:1426810-1427281	'ABRINI_FRU'	'ABRINI_RMG'	OK	26.6275	6.28363	-2.08324	-4.68588	0.00085	0.00209829	yes
CAETHG_1336	CP006763:1427510-1428527	'ABRINI_FRU'	'ABRINI_RMG'	OK	43.8172	82.2478	0.908479	1.81745	0.00065	0.00164675	yes
CAETHG_1337	CP006763:1428667-1429132	'ABRINI_FRU'	'ABRINI_RMG'	OK	25.6083	21.2101	-0.271859	-0.651512	0.4394	0.516446	no
CAETHG_1338	CP006763:1429146-1431507	'ABRINI_FRU'	'ABRINI_RMG'	OK	46.4044	47.3572	0.0293216	0.0635062	0.90795	0.928513	no
CAETHG_1339	CP006763:1431563-1433933	'ABRINI_FRU'	'ABRINI_RMG'	OK	50.3153	65.5854	0.382379	0.864558	0.13705	0.191827	no
CAETHG_1340	CP006763:1434015-1434615	'ABRINI_FRU'	'ABRINI_RMG'	OK	290.692	105.655	-1.46012	-4.13758	5e-05	0.00015337	yes
CAETHG_1341	CP006763:1434777-1437159	'ABRINI_FRU'	'ABRINI_RMG'	OK	37.6041	21.7453	-0.790183	-1.65703	0.0027	0.00598267	yes
CAETHG_1342	CP006763:1437704-1438718	'ABRINI_FRU'	'ABRINI_RMG'	OK	49.4651	26.3919	-0.906318	-2.10134	0.00165	0.00382764	yes
CAETHG_1343	CP006763:1439066-1439849	'ABRINI_FRU'	'ABRINI_RMG'	OK	23.4513	8.13506	-1.52744	-3.17901	5e-05	0.00015337	yes
CAETHG_1344	CP006763:1439927-1440287	'ABRINI_FRU'	'ABRINI_RMG'	OK	807.99	671.532	-0.266882	-1.17541	0.29385	0.366163	no
CAETHG_1345	CP006763:1440315-1440513	'ABRINI_FRU'	'ABRINI_RMG'	OK	268.73	261.12	-0.0414443	-0.354173	0.8956	0.918422	no
CAETHG_1346	CP006763:1440532-1441054	'ABRINI_FRU'	'ABRINI_RMG'	OK	173.297	47.2812	-1.87391	-5.80529	5e-05	0.00015337	yes
CAETHG_1347	CP006763:1441253-1443167	'ABRINI_FRU'	'ABRINI_RMG'	OK	85.5309	347.016	2.02049	3.72507	5e-05	0.00015337	yes
CAETHG_1348	CP006763:1443835-1444735	'ABRINI_FRU'	'ABRINI_RMG'	OK	7.98148	1.64638	-2.27736	-3.13121	0.0016	0.00372219	yes
CAETHG_1349	CP006763:1445569-1446208	'ABRINI_FRU'	'ABRINI_RMG'	OK	9.35835	2.25815	-2.05111	-2.52844	0.004	0.00853348	yes
CAETHG_1350	CP006763:1446358-1447510	'ABRINI_FRU'	'ABRINI_RMG'	OK	107.572	32.6988	-1.71799	-4.54728	5e-05	0.00015337	yes
CAETHG_1351	CP006763:1447607-1448360	'ABRINI_FRU'	'ABRINI_RMG'	OK	729.683	959.636	0.395218	0.970175	0.1497	0.206981	no
CAETHG_1352	CP006763:1448498-1449380	'ABRINI_FRU'	'ABRINI_RMG'	OK	1375.1	1119.09	-0.297211	-0.652313	0.32025	0.394347	no
CAETHG_1353	CP006763:1449436-1450429	'ABRINI_FRU'	'ABRINI_RMG'	OK	537.824	289.487	-0.893634	-2.01403	0.00105	0.00254597	yes
CAETHG_1354	CP006763:1450921-1451191	'ABRINI_FRU'	'ABRINI_RMG'	OK	111.66	50.7642	-1.13723	-5.39091	0.00245	0.00548702	yes
CAETHG_1355	CP006763:1451327-1452068	'ABRINI_FRU'	'ABRINI_RMG'	OK	79.1955	22.4934	-1.81592	-4.84183	5e-05	0.00015337	yes
CAETHG_1356	CP006763:1452097-1452988	'ABRINI_FRU'	'ABRINI_RMG'	OK	50.2319	31.8467	-0.657459	-1.48439	0.01555	0.028691	yes
CAETHG_1357	CP006763:1453122-1453839	'ABRINI_FRU'	'ABRINI_RMG'	OK	507.708	232.022	-1.12974	-2.88019	0.0001	0.00029355	yes
CAETHG_1358	CP006763:1453915-1454644	'ABRINI_FRU'	'ABRINI_RMG'	OK	572.512	789.294	0.463256	1.30381	0.07945	0.119786	no
CAETHG_1359	CP006763:1454721-1455219	'ABRINI_FRU'	'ABRINI_RMG'	OK	232.657	171.316	-0.441545	-1.48004	0.09145	0.135457	no
CAETHG_1360	CP006763:1455382-1456135	'ABRINI_FRU'	'ABRINI_RMG'	OK	51.7137	16.4824	-1.64962	-4.10846	5e-05	0.00015337	yes
CAETHG_1361	CP006763:1456325-1456853	'ABRINI_FRU'	'ABRINI_RMG'	OK	68.3963	35.0096	-0.96617	-3.89416	0.00425	0.00901151	yes
CAETHG_1362	CP006763:1456857-1457747	'ABRINI_FRU'	'ABRINI_RMG'	NOTEST	7.09627	0	#NAME?	0	1	1	no
CAETHG_1363	CP006763:1456857-1457747	'ABRINI_FRU'	'ABRINI_RMG'	OK	3.39627	2.10785	-0.688179	-0.652464	0.2619	0.331538	no
CAETHG_1364	CP006763:1457872-1458142	'ABRINI_FRU'	'ABRINI_RMG'	OK	92.8357	18.6747	-2.31359	-7.71015	5e-05	0.00015337	yes
CAETHG_1365	CP006763:1458712-1460059	'ABRINI_FRU'	'ABRINI_RMG'	OK	63.5575	52.0529	-0.288084	-0.641652	0.26565	0.335581	no
CAETHG_1366	CP006763:1460230-1462879	'ABRINI_FRU'	'ABRINI_RMG'	OK	86.2162	48.0251	-0.84417	-1.73702	0.001	0.002434	yes
CAETHG_1367	CP006763:1463266-1463671	'ABRINI_FRU'	'ABRINI_RMG'	OK	107.245	85.3167	-0.330005	-1.33542	0.2552	0.324201	no
CAETHG_1368	CP006763:1463874-1464705	'ABRINI_FRU'	'ABRINI_RMG'	OK	74.9853	129.36	0.78671	1.82157	0.00185	0.00424183	yes
CAETHG_1369	CP006763:1464770-1466336	'ABRINI_FRU'	'ABRINI_RMG'	OK	29.1666	42.737	0.551171	1.64214	0.0407	0.0670673	no
CAETHG_1370	CP006763:1466683-1467790	'ABRINI_FRU'	'ABRINI_RMG'	OK	30.2927	47.4329	0.646918	1.60173	0.01985	0.0356498	yes
CAETHG_1371	CP006763:1468066-1468816	'ABRINI_FRU'	'ABRINI_RMG'	OK	109.295	100.405	-0.122387	-0.30192	0.6433	0.704681	no
CAETHG_1372	CP006763:1469442-1470378	'ABRINI_FRU'	'ABRINI_RMG'	OK	15.2389	25.7772	0.758332	1.83814	0.0169	0.0309527	yes
CAETHG_1373	CP006763:1470637-1471657	'ABRINI_FRU'	'ABRINI_RMG'	OK	1.22591	4.68512	1.93423	2.37768	0.0098	0.0190244	yes
CAETHG_1374	CP006763:1471689-1472367	'ABRINI_FRU'	'ABRINI_RMG'	OK	4.9368	17.9054	1.85874	3.10599	0.0001	0.00029355	yes
CAETHG_1375	CP006763:1472625-1473945	'ABRINI_FRU'	'ABRINI_RMG'	OK	1.59564	9.16574	2.52212	3.7795	5e-05	0.00015337	yes
CAETHG_1376	CP006763:1474078-1475215	'ABRINI_FRU'	'ABRINI_RMG'	OK	5.09152	33.7836	2.73015	5.17927	5e-05	0.00015337	yes
CAETHG_1377	CP006763:1475259-1475532	'ABRINI_FRU'	'ABRINI_RMG'	OK	30.3001	236.727	2.96583	11.0223	5e-05	0.00015337	yes
CAETHG_1378	CP006763:1475621-1475956	'ABRINI_FRU'	'ABRINI_RMG'	NOTEST	0	30.3974	inf	0	1	1	no
CAETHG_1379	CP006763:1475621-1475956	'ABRINI_FRU'	'ABRINI_RMG'	OK	11.6199	24.1802	1.05723	1.03535	0.12715	0.180079	no
CAETHG_1380	CP006763:1476159-1476492	'ABRINI_FRU'	'ABRINI_RMG'	OK	23.2198	14.7003	-0.659511	-1.8845	0.19435	0.257986	no
CAETHG_1381	CP006763:1476495-1477245	'ABRINI_FRU'	'ABRINI_RMG'	OK	22.4175	20.47	-0.131113	-0.427227	0.69115	0.747811	no
CAETHG_1382	CP006763:1477315-1480891	'ABRINI_FRU'	'ABRINI_RMG'	OK	198.436	876.915	2.14376	2.17303	0.0025	0.005587	yes
CAETHG_1383	CP006763:1477315-1480891	'ABRINI_FRU'	'ABRINI_RMG'	OK	296.583	861.279	1.53805	1.58239	0.0133	0.0249857	yes
CAETHG_1384	CP006763:1477315-1480891	'ABRINI_FRU'	'ABRINI_RMG'	OK	160.035	705.019	2.13927	2.02812	0.00085	0.00209829	yes
CAETHG_1385	CP006763:1480968-1481961	'ABRINI_FRU'	'ABRINI_RMG'	OK	1487.18	5039.24	1.76063	2.72779	5e-05	0.00015337	yes
CAETHG_1386	CP006763:1482437-1483049	'ABRINI_FRU'	'ABRINI_RMG'	OK	9.07543	7.13069	-0.347924	-0.71334	0.4485	0.525526	no
CAETHG_1387	CP006763:1483054-1483597	'ABRINI_FRU'	'ABRINI_RMG'	OK	12.8397	24.0259	0.903972	2.14014	0.0163	0.0299303	yes
CAETHG_1388	CP006763:1483621-1484215	'ABRINI_FRU'	'ABRINI_RMG'	OK	4.59796	5.89384	0.358215	0.58207	0.507	0.581361	no
CAETHG_1389	CP006763:1484459-1485188	'ABRINI_FRU'	'ABRINI_RMG'	OK	6.09715	9.44198	0.630954	1.07453	0.11215	0.162139	no
CAETHG_1390	CP006763:1485207-1485837	'ABRINI_FRU'	'ABRINI_RMG'	OK	1.27492	2.18456	0.776933	0.733597	0.3814	0.457848	no
CAETHG_1391	CP006763:1486116-1486491	'ABRINI_FRU'	'ABRINI_RMG'	OK	13.1226	3.69136	-1.82983	-3.10049	0.03565	0.0598288	no
CAETHG_1392	CP006763:1486525-1487278	'ABRINI_FRU'	'ABRINI_RMG'	OK	17.5191	10.1253	-0.790968	-1.57351	0.01995	0.0357902	yes
CAETHG_1393	CP006763:1487419-1488226	'ABRINI_FRU'	'ABRINI_RMG'	OK	16.1385	14.3331	-0.171157	-0.368054	0.59275	0.65996	no
CAETHG_1394	CP006763:1490910-1491195	'ABRINI_FRU'	'ABRINI_RMG'	OK	51.8447	141.396	1.44748	6.57837	0.0003	0.000809958	yes
CAETHG_1395	CP006763:1491211-1492216	'ABRINI_FRU'	'ABRINI_RMG'	OK	48.6108	144.292	1.56965	4.22107	5e-05	0.00015337	yes
CAETHG_1396	CP006763:1492233-1492728	'ABRINI_FRU'	'ABRINI_RMG'	OK	33.2925	38.5282	0.210716	0.57387	0.4884	0.563981	no
CAETHG_1397	CP006763:1492746-1495314	'ABRINI_FRU'	'ABRINI_RMG'	OK	104.212	243.412	1.22388	2.83038	5e-05	0.00015337	yes
CAETHG_1398	CP006763:1495326-1496073	'ABRINI_FRU'	'ABRINI_RMG'	OK	96.9577	199.3	1.03951	2.90122	5e-05	0.00015337	yes
CAETHG_1399	CP006763:1496076-1497006	'ABRINI_FRU'	'ABRINI_RMG'	OK	151.479	480.179	1.66445	4.12803	5e-05	0.00015337	yes
CAETHG_1400	CP006763:1497006-1498761	'ABRINI_FRU'	'ABRINI_RMG'	OK	79.4566	179.153	1.17296	2.80435	5e-05	0.00015337	yes
CAETHG_1401	CP006763:1498779-1499490	'ABRINI_FRU'	'ABRINI_RMG'	OK	112.955	220.424	0.964536	2.84448	0.0002	0.000558102	yes
CAETHG_1403	CP006763:1502474-1502741	'ABRINI_FRU'	'ABRINI_RMG'	NOTEST	2.94749	0	#NAME?	0	1	1	no
CAETHG_1404	CP006763:1503044-1503806	'ABRINI_FRU'	'ABRINI_RMG'	OK	46.796	40.0845	-0.22334	-0.612907	0.4178	0.495118	no
CAETHG_1405	CP006763:1503835-1504351	'ABRINI_FRU'	'ABRINI_RMG'	OK	12.7102	8.51736	-0.57751	-1.43596	0.25395	0.322935	no
CAETHG_1406	CP006763:1506494-1506716	'ABRINI_FRU'	'ABRINI_RMG'	NOTEST	2.75379	3.77867	0.456459	0	1	1	no
CAETHG_1407	CP006763:1506959-1507358	'ABRINI_FRU'	'ABRINI_RMG'	OK	90.4287	71.1468	-0.345983	-1.43757	0.2541	0.323018	no
CAETHG_1408	CP006763:1507372-1507900	'ABRINI_FRU'	'ABRINI_RMG'	OK	373.428	856.398	1.19745	4.66037	5e-05	0.00015337	yes
CAETHG_1409	CP006763:1507906-1508449	'ABRINI_FRU'	'ABRINI_RMG'	OK	181.965	91.6856	-0.988894	-2.89179	0.00015	0.000427948	yes
CAETHG_1410	CP006763:1508652-1509117	'ABRINI_FRU'	'ABRINI_RMG'	OK	58.3521	19.6094	-1.57324	-4.48216	0.0001	0.00029355	yes
CAETHG_1411	CP006763:1509131-1510010	'ABRINI_FRU'	'ABRINI_RMG'	OK	22.2927	7.38896	-1.59313	-3.52013	5e-05	0.00015337	yes
CAETHG_1412	CP006763:1510165-1511620	'ABRINI_FRU'	'ABRINI_RMG'	OK	18.8361	20.0648	0.0911653	0.240984	0.75	0.797492	no
CAETHG_1413	CP006763:1511719-1512193	'ABRINI_FRU'	'ABRINI_RMG'	OK	54.9275	18.6413	-1.55903	-4.03683	0.00015	0.000427948	yes
CAETHG_1414	CP006763:1512633-1513978	'ABRINI_FRU'	'ABRINI_RMG'	OK	13.8896	16.955	0.287699	0.416323	0.56655	0.636038	no
CAETHG_1415	CP006763:1512633-1513978	'ABRINI_FRU'	'ABRINI_RMG'	OK	16.8014	16.6184	-0.0158048	-0.0229702	0.96745	0.974417	no
CAETHG_1416	CP006763:1514025-1515441	'ABRINI_FRU'	'ABRINI_RMG'	OK	49.0782	41.7946	-0.231766	-0.695581	0.38675	0.463203	no
CAETHG_1417	CP006763:1515556-1515994	'ABRINI_FRU'	'ABRINI_RMG'	OK	39.8556	25.2447	-0.6588	-1.7858	0.0465	0.0755501	no
CAETHG_1418	CP006763:1516185-1516977	'ABRINI_FRU'	'ABRINI_RMG'	OK	35.6304	34.2126	-0.0585827	-0.143994	0.83615	0.869824	no
CAETHG_1419	CP006763:1517065-1517320	'ABRINI_FRU'	'ABRINI_RMG'	OK	124.338	91.817	-0.43744	-2.01789	0.1792	0.241028	no
CAETHG_1420	CP006763:1517634-1518057	'ABRINI_FRU'	'ABRINI_RMG'	OK	4.53022	1.57113	-1.52778	-1.84843	0.2069	0.272563	no
CAETHG_1421	CP006763:1518152-1518992	'ABRINI_FRU'	'ABRINI_RMG'	OK	6.1402	3.90776	-0.651945	-0.960654	0.142	0.19791	no
CAETHG_1422	CP006763:1519169-1519949	'ABRINI_FRU'	'ABRINI_RMG'	OK	18.4586	12.1959	-0.597898	-1.30897	0.0681	0.105063	no
CAETHG_1423	CP006763:1520466-1521093	'ABRINI_FRU'	'ABRINI_RMG'	OK	7.55162	6.17003	-0.29151	-0.420365	0.47545	0.551972	no
CAETHG_1424	CP006763:1521531-1527945	'ABRINI_FRU'	'ABRINI_RMG'	OK	5.1595	18.7925	1.86485	3.32288	5e-05	0.00015337	yes
CAETHG_1425	CP006763:1528345-1530411	'ABRINI_FRU'	'ABRINI_RMG'	OK	9.92667	1.39425	-2.83182	-2.52618	0.01405	0.0262229	yes
CAETHG_1426	CP006763:1528345-1530411	'ABRINI_FRU'	'ABRINI_RMG'	OK	12.4927	2.83454	-2.1399	-4.2815	0.00135	0.00320032	yes
CAETHG_1427	CP006763:1530590-1531301	'ABRINI_FRU'	'ABRINI_RMG'	OK	4.06283	0.944942	-2.10419	-1.93251	0.03885	0.0643888	no
CAETHG_1428	CP006763:1531302-1532786	'ABRINI_FRU'	'ABRINI_RMG'	OK	4.46947	3.95277	-0.17724	-0.230486	0.84225	0.875058	no
CAETHG_1429	CP006763:1531302-1532786	'ABRINI_FRU'	'ABRINI_RMG'	OK	16.2623	14.8929	-0.126905	-0.286061	0.73685	0.786499	no
CAETHG_1430	CP006763:1532884-1533274	'ABRINI_FRU'	'ABRINI_RMG'	OK	125.124	136.724	0.127902	0.453956	0.6427	0.704091	no
CAETHG_1431	CP006763:1533494-1535333	'ABRINI_FRU'	'ABRINI_RMG'	OK	56.1786	166.551	1.56787	3.9299	5e-05	0.00015337	yes
CAETHG_1432	CP006763:1535681-1536239	'ABRINI_FRU'	'ABRINI_RMG'	OK	1263.83	1909.31	0.595252	1.61371	0.03495	0.0588175	no
CAETHG_1433	CP006763:1536481-1536724	'ABRINI_FRU'	'ABRINI_RMG'	OK	51.2387	13.3202	-1.94362	-5.24029	0.0038	0.00814468	yes
CAETHG_1434	CP006763:1536831-1536963	'ABRINI_FRU'	'ABRINI_RMG'	NOTEST	2.39698	0	#NAME?	0	1	1	no
CAETHG_1435	CP006763:1537001-1537646	'ABRINI_FRU'	'ABRINI_RMG'	OK	10.8387	6.18391	-0.809598	-1.34276	0.04815	0.0777026	no
CAETHG_1436	CP006763:1537751-1539256	'ABRINI_FRU'	'ABRINI_RMG'	OK	8.48505	11.1709	0.396744	0.539102	0.4965	0.571608	no
CAETHG_1437	CP006763:1537751-1539256	'ABRINI_FRU'	'ABRINI_RMG'	OK	15.2113	14.4053	-0.0785352	-0.115919	0.8272	0.862678	no
CAETHG_1438	CP006763:1539258-1539633	'ABRINI_FRU'	'ABRINI_RMG'	OK	17.3922	5.52593	-1.65415	-2.69695	0.0092	0.017963	yes
CAETHG_1439	CP006763:1539898-1540057	'ABRINI_FRU'	'ABRINI_RMG'	NOTEST	11.5427	0	#NAME?	0	1	1	no
CAETHG_1440	CP006763:1540130-1542036	'ABRINI_FRU'	'ABRINI_RMG'	OK	10.9601	3.42409	-1.67847	-2.33832	0.00145	0.00341199	yes
CAETHG_1441	CP006763:1540130-1542036	'ABRINI_FRU'	'ABRINI_RMG'	OK	57.5223	55.9483	-0.0400271	-0.0472212	0.9319	0.946927	no
CAETHG_1442	CP006763:1542415-1546711	'ABRINI_FRU'	'ABRINI_RMG'	OK	89.0767	131.818	0.565426	1.06176	0.03755	0.062587	no
CAETHG_1443	CP006763:1547168-1548730	'ABRINI_FRU'	'ABRINI_RMG'	OK	18.6772	18.5036	-0.0134741	-0.021878	0.9743	0.97951	no
CAETHG_1444	CP006763:1547168-1548730	'ABRINI_FRU'	'ABRINI_RMG'	OK	28.9739	33.5895	0.213254	0.399329	0.55035	0.62144	no
CAETHG_1445	CP006763:1548960-1549509	'ABRINI_FRU'	'ABRINI_RMG'	OK	102.664	87.0564	-0.237907	-0.736846	0.37465	0.450735	no
CAETHG_1446	CP006763:1549714-1550074	'ABRINI_FRU'	'ABRINI_RMG'	OK	289.614	75.075	-1.94773	-9.11415	5e-05	0.00015337	yes
CAETHG_1447	CP006763:1550116-1551304	'ABRINI_FRU'	'ABRINI_RMG'	OK	165.877	166.586	0.00615377	0.0176764	0.97895	0.982892	no
CAETHG_1448	CP006763:1551374-1552226	'ABRINI_FRU'	'ABRINI_RMG'	OK	96.4162	35.0153	-1.46129	-3.88312	5e-05	0.00015337	yes
CAETHG_1449	CP006763:1552258-1553509	'ABRINI_FRU'	'ABRINI_RMG'	OK	61.5778	22.3108	-1.46467	-3.48765	5e-05	0.00015337	yes
CAETHG_1450	CP006763:1553694-1555272	'ABRINI_FRU'	'ABRINI_RMG'	OK	105.603	25.9169	-2.02668	-4.51143	5e-05	0.00015337	yes
CAETHG_1451	CP006763:1555504-1556074	'ABRINI_FRU'	'ABRINI_RMG'	OK	9.98477	2.77339	-1.84808	-2.50382	0.01015	0.0196142	yes
CAETHG_1452	CP006763:1556393-1556552	'ABRINI_FRU'	'ABRINI_RMG'	OK	21.8298	4.53722	-2.26642	-4.33677	0.22465	0.292153	no
CAETHG_1453	CP006763:1556801-1557266	'ABRINI_FRU'	'ABRINI_RMG'	OK	631.485	345.389	-0.870525	-2.88076	0.00075	0.0018728	yes
CAETHG_1454	CP006763:1557707-1558556	'ABRINI_FRU'	'ABRINI_RMG'	OK	82.0493	33.6651	-1.28524	-3.47858	5e-05	0.00015337	yes
CAETHG_1455	CP006763:1558656-1559301	'ABRINI_FRU'	'ABRINI_RMG'	OK	139.326	204.894	0.556409	1.73064	0.0337	0.0569731	no
CAETHG_1456	CP006763:1560043-1560952	'ABRINI_FRU'	'ABRINI_RMG'	OK	38.7619	8.31317	-2.22117	-5.12382	5e-05	0.00015337	yes
CAETHG_1457	CP006763:1561110-1561311	'ABRINI_FRU'	'ABRINI_RMG'	OK	1445.06	755.05	-0.936489	-7.31507	0.0003	0.000809958	yes
CAETHG_1458	CP006763:1561392-1561587	'ABRINI_FRU'	'ABRINI_RMG'	OK	52.1812	162.329	1.63732	8.75249	0.00085	0.00209829	yes
CAETHG_1459	CP006763:1561880-1562927	'ABRINI_FRU'	'ABRINI_RMG'	OK	63.2984	49.9363	-0.342081	-0.800133	0.1905	0.253816	no
CAETHG_1460	CP006763:1562956-1563505	'ABRINI_FRU'	'ABRINI_RMG'	OK	28.5356	16.6752	-0.775059	-1.97197	0.0242	0.0424648	yes
CAETHG_1461	CP006763:1563538-1564186	'ABRINI_FRU'	'ABRINI_RMG'	OK	33.717	17.1917	-0.971768	-2.38567	0.00325	0.0070756	yes
CAETHG_1462	CP006763:1564351-1564945	'ABRINI_FRU'	'ABRINI_RMG'	OK	63.9974	33.8674	-0.918116	-2.49167	0.00205	0.0046585	yes
CAETHG_1463	CP006763:1565373-1565796	'ABRINI_FRU'	'ABRINI_RMG'	OK	175.545	769.878	2.13279	7.78709	5e-05	0.00015337	yes
CAETHG_1464	CP006763:1565856-1567083	'ABRINI_FRU'	'ABRINI_RMG'	OK	12.1881	3.61637	-1.75286	-3.37526	0.00025	0.000685617	yes
CAETHG_1465	CP006763:1567194-1568136	'ABRINI_FRU'	'ABRINI_RMG'	OK	67.8547	25.795	-1.39536	-4.60606	5e-05	0.00015337	yes
CAETHG_1466	CP006763:1568286-1569240	'ABRINI_FRU'	'ABRINI_RMG'	OK	31.9522	20.8843	-0.613499	-1.40634	0.03295	0.0558864	no
CAETHG_1467	CP006763:1569472-1569856	'ABRINI_FRU'	'ABRINI_RMG'	OK	146.021	213.09	0.545286	1.74546	0.049	0.0789188	no
CAETHG_1468	CP006763:1569946-1570648	'ABRINI_FRU'	'ABRINI_RMG'	OK	209.94	95.3824	-1.13818	-3.80759	5e-05	0.00015337	yes
CAETHG_1469	CP006763:1570725-1571316	'ABRINI_FRU'	'ABRINI_RMG'	OK	79.5083	46.4764	-0.774607	-2.26463	0.0065	0.0131944	yes
CAETHG_1470	CP006763:1571330-1573655	'ABRINI_FRU'	'ABRINI_RMG'	OK	83.3972	72.1387	-0.209226	-0.446344	0.4189	0.496165	no
CAETHG_1471	CP006763:1573760-1575050	'ABRINI_FRU'	'ABRINI_RMG'	OK	1812.61	1786.95	-0.0205727	-0.0318915	0.95685	0.966882	no
CAETHG_1472	CP006763:1575069-1575654	'ABRINI_FRU'	'ABRINI_RMG'	OK	1700.11	1967.75	0.210923	0.495003	0.4738	0.550558	no
CAETHG_1473	CP006763:1575798-1577091	'ABRINI_FRU'	'ABRINI_RMG'	OK	1939.68	837.874	-1.21101	-2.26615	0.0005	0.00129623	yes
CAETHG_1474	CP006763:1577397-1578183	'ABRINI_FRU'	'ABRINI_RMG'	OK	82.7604	16.466	-2.32946	-5.72313	5e-05	0.00015337	yes
CAETHG_1475	CP006763:1578244-1579024	'ABRINI_FRU'	'ABRINI_RMG'	OK	631.72	373.737	-0.75726	-2.08714	0.00455	0.00958207	yes
CAETHG_1476	CP006763:1579456-1580029	'ABRINI_FRU'	'ABRINI_RMG'	OK	112.58	109.149	-0.0446498	-0.111387	0.86705	0.895793	no
CAETHG_1477	CP006763:1580039-1580930	'ABRINI_FRU'	'ABRINI_RMG'	OK	20.5099	23.3745	0.188613	0.406857	0.5258	0.598551	no
CAETHG_1478	CP006763:1581009-1581762	'ABRINI_FRU'	'ABRINI_RMG'	OK	31.7937	37.4851	0.237578	0.542276	0.4021	0.479037	no
CAETHG_1479	CP006763:1581839-1582709	'ABRINI_FRU'	'ABRINI_RMG'	OK	48.5036	45.3608	-0.0966443	-0.227269	0.716	0.769256	no
CAETHG_1480	CP006763:1582745-1583183	'ABRINI_FRU'	'ABRINI_RMG'	OK	28.0413	36.2052	0.368642	1.15605	0.28305	0.354516	no
CAETHG_1481	CP006763:1583198-1584119	'ABRINI_FRU'	'ABRINI_RMG'	OK	58.097	61.1393	0.0736366	0.182041	0.7847	0.827333	no
CAETHG_1482	CP006763:1584327-1585083	'ABRINI_FRU'	'ABRINI_RMG'	OK	142.282	451.142	1.66483	3.84308	5e-05	0.00015337	yes
CAETHG_1483	CP006763:1585228-1585480	'ABRINI_FRU'	'ABRINI_RMG'	OK	28.2019	108.205	1.9399	6.766	0.0001	0.00029355	yes
CAETHG_1484	CP006763:1585497-1586826	'ABRINI_FRU'	'ABRINI_RMG'	OK	61.3463	284.269	2.21221	4.82685	5e-05	0.00015337	yes
CAETHG_1485	CP006763:1587289-1588552	'ABRINI_FRU'	'ABRINI_RMG'	OK	312.537	280.393	-0.156575	-0.392042	0.54955	0.620781	no
CAETHG_1486	CP006763:1588801-1589557	'ABRINI_FRU'	'ABRINI_RMG'	OK	538.463	310.866	-0.792556	-1.893	0.0027	0.00598267	yes
CAETHG_1487	CP006763:1589716-1590610	'ABRINI_FRU'	'ABRINI_RMG'	OK	20.0524	6.25281	-1.6812	-3.254	5e-05	0.00015337	yes
CAETHG_1488	CP006763:1590692-1590857	'ABRINI_FRU'	'ABRINI_RMG'	OK	1539.74	16.723	-6.52471	-24.8114	0.00115	0.00276506	yes
CAETHG_1489	CP006763:1591020-1591326	'ABRINI_FRU'	'ABRINI_RMG'	OK	4.76933	1.42914	-1.73864	-1.68816	0.21755	0.284469	no
CAETHG_1490	CP006763:1591742-1592105	'ABRINI_FRU'	'ABRINI_RMG'	NOTEST	1.34186	0	#NAME?	0	1	1	no
CAETHG_1491	CP006763:1592178-1592442	'ABRINI_FRU'	'ABRINI_RMG'	NOTEST	0.399864	0	#NAME?	0	1	1	no
CAETHG_1492	CP006763:1592669-1593932	'ABRINI_FRU'	'ABRINI_RMG'	OK	1.66746	2.31642	0.474241	0.592963	0.3742	0.450336	no
CAETHG_1493	CP006763:1594003-1594645	'ABRINI_FRU'	'ABRINI_RMG'	OK	57.1455	60.2994	0.0775045	0.264393	0.78225	0.825281	no
CAETHG_1494	CP006763:1594692-1595919	'ABRINI_FRU'	'ABRINI_RMG'	OK	8.34226	4.05281	-1.04152	-1.61337	0.00375	0.00805106	yes
CAETHG_1495	CP006763:1595920-1597659	'ABRINI_FRU'	'ABRINI_RMG'	OK	3.259	3.86993	0.247878	0.256818	0.79875	0.839368	no
CAETHG_1496	CP006763:1595920-1597659	'ABRINI_FRU'	'ABRINI_RMG'	OK	2.04218	1.40771	-0.536756	-0.481089	0.3159	0.389618	no
CAETHG_1497	CP006763:1597691-1599188	'ABRINI_FRU'	'ABRINI_RMG'	OK	2.99852	1.91445	-0.647317	-0.882682	0.1469	0.203675	no
CAETHG_1498	CP006763:1599227-1600496	'ABRINI_FRU'	'ABRINI_RMG'	NOTEST	0.707286	0.749942	0.0844847	0	1	1	no
CAETHG_1499	CP006763:1600559-1601927	'ABRINI_FRU'	'ABRINI_RMG'	OK	2.60545	2.77967	0.0933817	0.124307	0.827	0.862574	no
CAETHG_1500	CP006763:1601939-1603085	'ABRINI_FRU'	'ABRINI_RMG'	NOTEST	1.14225	0.637231	-0.841993	0	1	1	no
CAETHG_1501	CP006763:1603253-1604458	'ABRINI_FRU'	'ABRINI_RMG'	NOTEST	0.680965	0.0749243	-3.18407	0	1	1	no
CAETHG_1503	CP006763:1604796-1606374	'ABRINI_FRU'	'ABRINI_RMG'	OK	4.29375	0.389132	-3.46391	-3.28725	0.00705	0.0141928	yes
CAETHG_1504	CP006763:1606380-1607789	'ABRINI_FRU'	'ABRINI_RMG'	OK	2.35583	0.628455	-1.90636	-1.64295	0.02875	0.0495319	yes
CAETHG_1505	CP006763:1606380-1607789	'ABRINI_FRU'	'ABRINI_RMG'	OK	5.06726	0	#NAME?	#NAME?	0.14265	0.198695	no
CAETHG_1506	CP006763:1607812-1608901	'ABRINI_FRU'	'ABRINI_RMG'	OK	32.3545	2.97781	-3.44164	-6.61297	5e-05	0.00015337	yes
CAETHG_1507	CP006763:1608902-1609055	'ABRINI_FRU'	'ABRINI_RMG'	NOTEST	0.598812	0	#NAME?	0	1	1	no
CAETHG_1508	CP006763:1609443-1610187	'ABRINI_FRU'	'ABRINI_RMG'	OK	58.4478	3.28227	-4.15438	-7.48621	5e-05	0.00015337	yes
CAETHG_1509	CP006763:1610204-1612143	'ABRINI_FRU'	'ABRINI_RMG'	OK	78.4341	7.15062	-3.45534	-6.85524	5e-05	0.00015337	yes
CAETHG_1510	CP006763:1610204-1612143	'ABRINI_FRU'	'ABRINI_RMG'	OK	46.0532	2.31387	-4.31492	-2.43219	0.0269	0.046653	yes
CAETHG_1511	CP006763:1612919-1613087	'ABRINI_FRU'	'ABRINI_RMG'	NOTEST	4.74992	0	#NAME?	0	1	1	no
CAETHG_1512	CP006763:1613546-1614363	'ABRINI_FRU'	'ABRINI_RMG'	OK	9.69782	5.15603	-0.911401	-1.34638	0.1708	0.231194	no
CAETHG_1513	CP006763:1613546-1614363	'ABRINI_FRU'	'ABRINI_RMG'	OK	16.5869	6.97112	-1.25058	-1.28657	0.05625	0.0889836	no
CAETHG_1514	CP006763:1614509-1615697	'ABRINI_FRU'	'ABRINI_RMG'	OK	68.8056	67.0788	-0.0366688	-0.0943839	0.89055	0.915126	no
CAETHG_1515	CP006763:1616097-1617045	'ABRINI_FRU'	'ABRINI_RMG'	OK	658.136	6442.59	3.29118	9.08782	5e-05	0.00015337	yes
CAETHG_1516	CP006763:1617132-1617297	'ABRINI_FRU'	'ABRINI_RMG'	OK	1687.24	2185.3	0.373167	4.50741	0.152	0.209631	no
CAETHG_1517	CP006763:1617358-1618006	'ABRINI_FRU'	'ABRINI_RMG'	OK	67.8662	110.116	0.698254	1.91353	0.00975	0.0189338	yes
CAETHG_1518	CP006763:1618146-1618557	'ABRINI_FRU'	'ABRINI_RMG'	OK	399.085	105.34	-1.92164	-7.97827	5e-05	0.00015337	yes
CAETHG_1519	CP006763:1618709-1619879	'ABRINI_FRU'	'ABRINI_RMG'	OK	33.7583	82.8199	1.29474	3.19419	5e-05	0.00015337	yes
CAETHG_1520	CP006763:1619910-1620042	'ABRINI_FRU'	'ABRINI_RMG'	OK	61.9587	559.17	3.17391	31.2687	0.00125	0.00298859	yes
CAETHG_1521	CP006763:1620241-1621192	'ABRINI_FRU'	'ABRINI_RMG'	OK	4.45418	3.73386	-0.254492	-0.374193	0.5636	0.63347	no
CAETHG_1522	CP006763:1621409-1621598	'ABRINI_FRU'	'ABRINI_RMG'	OK	52.6362	38.6114	-0.447026	-1.94197	0.41385	0.491147	no
CAETHG_1523	CP006763:1621845-1622076	'ABRINI_FRU'	'ABRINI_RMG'	OK	21.9409	10.3518	-1.08375	-2.69383	0.15315	0.210912	no
CAETHG_1524	CP006763:1622292-1622706	'ABRINI_FRU'	'ABRINI_RMG'	OK	96.7459	16.9837	-2.51005	-7.25391	5e-05	0.00015337	yes
CAETHG_1525	CP006763:1622764-1623676	'ABRINI_FRU'	'ABRINI_RMG'	OK	68.0979	20.131	-1.75819	-5.1645	5e-05	0.00015337	yes
CAETHG_1526	CP006763:1623690-1624829	'ABRINI_FRU'	'ABRINI_RMG'	OK	56.6624	49.5802	-0.192628	-0.391475	0.57815	0.646718	no
CAETHG_1527	CP006763:1623690-1624829	'ABRINI_FRU'	'ABRINI_RMG'	OK	42.6888	28.4792	-0.583949	-0.704732	0.1967	0.260743	no
CAETHG_1528	CP006763:1625198-1626908	'ABRINI_FRU'	'ABRINI_RMG'	OK	424.385	328.332	-0.370217	-0.908821	0.1772	0.23873	no
CAETHG_1529	CP006763:1627066-1627921	'ABRINI_FRU'	'ABRINI_RMG'	OK	53.7999	21.1901	-1.34421	-4.12461	5e-05	0.00015337	yes
CAETHG_1530	CP006763:1628229-1628466	'ABRINI_FRU'	'ABRINI_RMG'	NOTEST	1.22308	0	#NAME?	0	1	1	no
CAETHG_1531	CP006763:1628714-1629941	'ABRINI_FRU'	'ABRINI_RMG'	OK	1.64653	0.818357	-1.00863	-0.914372	0.1251	0.177615	no
CAETHG_1532	CP006763:1630054-1630654	'ABRINI_FRU'	'ABRINI_RMG'	OK	37.3241	40.3958	0.114097	0.252606	0.6953	0.75138	no
CAETHG_1533	CP006763:1631374-1632685	'ABRINI_FRU'	'ABRINI_RMG'	OK	9.4351	4.74542	-0.991502	-2.31941	0.0099	0.0191925	yes
CAETHG_1534	CP006763:1632714-1633635	'ABRINI_FRU'	'ABRINI_RMG'	OK	24.2672	20.336	-0.254974	-0.808496	0.41015	0.487311	no
CAETHG_1535	CP006763:1633636-1634674	'ABRINI_FRU'	'ABRINI_RMG'	OK	17.2549	16.0915	-0.100708	-0.231481	0.73355	0.784217	no
CAETHG_1536	CP006763:1634790-1635414	'ABRINI_FRU'	'ABRINI_RMG'	OK	7.0768	7.83567	0.14696	0.253952	0.73255	0.783514	no
CAETHG_1537	CP006763:1635788-1637138	'ABRINI_FRU'	'ABRINI_RMG'	OK	4.2343	2.71089	-0.643359	-1.06502	0.1427	0.198716	no
CAETHG_1538	CP006763:1637753-1639325	'ABRINI_FRU'	'ABRINI_RMG'	OK	4.05241	5.76959	0.509688	0.972885	0.16315	0.22244	no
CAETHG_1539	CP006763:1640177-1641062	'ABRINI_FRU'	'ABRINI_RMG'	OK	17.2744	15.6442	-0.143008	-0.391651	0.65925	0.718994	no
CAETHG_1540	CP006763:1641187-1642327	'ABRINI_FRU'	'ABRINI_RMG'	OK	25.3814	45.6707	0.847497	2.35516	0.0027	0.00598267	yes
CAETHG_1541	CP006763:1643920-1645304	'ABRINI_FRU'	'ABRINI_RMG'	OK	90.3466	43.7462	-1.04631	-2.24249	0.0155	0.0286125	yes
CAETHG_1542	CP006763:1643920-1645304	'ABRINI_FRU'	'ABRINI_RMG'	OK	51.6685	33.1195	-0.641604	-0.975555	0.0981	0.144171	no
CAETHG_1543	CP006763:1646061-1647591	'ABRINI_FRU'	'ABRINI_RMG'	OK	265.852	418.329	0.654014	1.55704	0.01845	0.0334656	yes
CAETHG_1544	CP006763:1648514-1648688	'ABRINI_FRU'	'ABRINI_RMG'	NOTEST	3.29224	0	#NAME?	0	1	1	no
CAETHG_1545	CP006763:1650305-1650776	'ABRINI_FRU'	'ABRINI_RMG'	OK	274.284	777.026	1.50229	5.04275	5e-05	0.00015337	yes
CAETHG_1546	CP006763:1650779-1652134	'ABRINI_FRU'	'ABRINI_RMG'	OK	101.033	122.294	0.275522	0.41655	0.5212	0.594731	no
CAETHG_1547	CP006763:1650779-1652134	'ABRINI_FRU'	'ABRINI_RMG'	OK	146.03	190.961	0.38701	0.656481	0.2333	0.301082	no
CAETHG_1548	CP006763:1652178-1653168	'ABRINI_FRU'	'ABRINI_RMG'	OK	86.1242	106.809	0.310545	0.703986	0.23225	0.300031	no
CAETHG_1549	CP006763:1653244-1654666	'ABRINI_FRU'	'ABRINI_RMG'	OK	143.381	31.613	-2.18126	-7.10689	5e-05	0.00015337	yes
CAETHG_1550	CP006763:1655031-1656648	'ABRINI_FRU'	'ABRINI_RMG'	OK	18.9855	4.63115	-2.03546	-4.07058	5e-05	0.00015337	yes
CAETHG_1551	CP006763:1656793-1657000	'ABRINI_FRU'	'ABRINI_RMG'	OK	81.4852	24.5466	-1.73101	-7.10672	0.0064	0.0130052	yes
CAETHG_1552	CP006763:1657036-1658467	'ABRINI_FRU'	'ABRINI_RMG'	OK	15.5985	19.3488	0.310837	0.667957	0.26645	0.336443	no
CAETHG_1553	CP006763:1658472-1659930	'ABRINI_FRU'	'ABRINI_RMG'	OK	15.815	16.1382	0.0291927	0.0614315	0.91745	0.935361	no
CAETHG_1554	CP006763:1659949-1660237	'ABRINI_FRU'	'ABRINI_RMG'	OK	5.10308	10.5909	1.05338	1.73094	0.18615	0.248742	no
CAETHG_1555	CP006763:1660250-1660976	'ABRINI_FRU'	'ABRINI_RMG'	OK	12.5903	13.7716	0.129386	0.276011	0.7076	0.76223	no
CAETHG_1556	CP006763:1661110-1663171	'ABRINI_FRU'	'ABRINI_RMG'	OK	7.62712	4.12902	-0.88534	-1.82516	0.00755	0.0150645	yes
CAETHG_1557	CP006763:1663224-1663494	'ABRINI_FRU'	'ABRINI_RMG'	OK	331.797	205.638	-0.690197	-3.13976	0.01175	0.0223632	yes
CAETHG_1558	CP006763:1663847-1665842	'ABRINI_FRU'	'ABRINI_RMG'	OK	36.1876	28.5985	-0.339556	-0.746167	0.1939	0.257478	no
CAETHG_1559	CP006763:1665874-1668115	'ABRINI_FRU'	'ABRINI_RMG'	OK	82.9018	47.7024	-0.797341	-1.8259	0.0025	0.005587	yes
CAETHG_1560	CP006763:1668282-1668576	'ABRINI_FRU'	'ABRINI_RMG'	OK	938.726	291.437	-1.68752	-8.30652	5e-05	0.00015337	yes
CAETHG_1561	CP006763:1668868-1669585	'ABRINI_FRU'	'ABRINI_RMG'	OK	21.3619	11.5753	-0.883987	-1.94723	0.01035	0.019957	yes
CAETHG_1562	CP006763:1669898-1670573	'ABRINI_FRU'	'ABRINI_RMG'	OK	400.553	301.293	-0.410826	-1.00775	0.114	0.164503	no
CAETHG_1563	CP006763:1670642-1672646	'ABRINI_FRU'	'ABRINI_RMG'	OK	192.704	161.866	-0.251586	-0.561173	0.33645	0.411161	no
CAETHG_1564	CP006763:1672891-1673335	'ABRINI_FRU'	'ABRINI_RMG'	OK	221.874	28.5246	-2.95946	-8.75584	5e-05	0.00015337	yes
CAETHG_1566	CP006763:1673795-1674188	'ABRINI_FRU'	'ABRINI_RMG'	OK	118.541	166.09	0.486579	1.47843	0.0682	0.105175	no
CAETHG_1567	CP006763:1674322-1674658	'ABRINI_FRU'	'ABRINI_RMG'	OK	15.7726	13.7983	-0.192932	-0.441258	0.69565	0.751687	no
CAETHG_1568	CP006763:1674845-1676198	'ABRINI_FRU'	'ABRINI_RMG'	OK	59.3277	72.9636	0.29847	0.66715	0.2443	0.31257	no
CAETHG_1569	CP006763:1676403-1677555	'ABRINI_FRU'	'ABRINI_RMG'	OK	19.0706	24.5305	0.363225	0.855016	0.20535	0.270988	no
CAETHG_1570	CP006763:1677827-1679360	'ABRINI_FRU'	'ABRINI_RMG'	OK	196.055	381.705	0.961198	1.99666	0.0005	0.00129623	yes
CAETHG_1571	CP006763:1679451-1680906	'ABRINI_FRU'	'ABRINI_RMG'	OK	204.98	615.944	1.58732	3.1081	5e-05	0.00015337	yes
CAETHG_1572	CP006763:1681440-1683075	'ABRINI_FRU'	'ABRINI_RMG'	OK	495.336	4681.34	3.24044	4.37795	5e-05	0.00015337	yes
CAETHG_1573	CP006763:1683133-1683418	'ABRINI_FRU'	'ABRINI_RMG'	OK	557.153	3965.45	2.83134	11.6896	5e-05	0.00015337	yes
CAETHG_1574	CP006763:1683753-1684470	'ABRINI_FRU'	'ABRINI_RMG'	OK	37.566	17.0619	-1.13865	-2.92594	0.00055	0.00141656	yes
CAETHG_1575	CP006763:1684686-1684842	'ABRINI_FRU'	'ABRINI_RMG'	OK	4.66913	11.637	1.3175	2.32119	0.4481	0.525111	no
CAETHG_1576	CP006763:1685073-1686753	'ABRINI_FRU'	'ABRINI_RMG'	OK	60.3462	380.349	2.65599	5.66784	5e-05	0.00015337	yes
CAETHG_1577	CP006763:1686757-1688632	'ABRINI_FRU'	'ABRINI_RMG'	OK	32.6078	102.223	1.64843	3.41788	5e-05	0.00015337	yes
CAETHG_1578	CP006763:1688633-1689110	'ABRINI_FRU'	'ABRINI_RMG'	OK	16.9594	44.8481	1.40296	3.82047	0.0002	0.000558102	yes
CAETHG_1579	CP006763:1690004-1690913	'ABRINI_FRU'	'ABRINI_RMG'	OK	36.6797	12.539	-1.54855	-3.55182	5e-05	0.00015337	yes
CAETHG_1580	CP006763:1691056-1693330	'ABRINI_FRU'	'ABRINI_RMG'	OK	721.6	2073.92	1.52309	2.01877	0.00035	0.000934175	yes
CAETHG_1581	CP006763:1693722-1694355	'ABRINI_FRU'	'ABRINI_RMG'	OK	137.153	47.8072	-1.52049	-4.04325	5e-05	0.00015337	yes
CAETHG_1582	CP006763:1694775-1696689	'ABRINI_FRU'	'ABRINI_RMG'	OK	67.571	42.3758	-0.673164	-1.66911	0.0075	0.014983	yes
CAETHG_1583	CP006763:1697027-1697822	'ABRINI_FRU'	'ABRINI_RMG'	OK	5.55081	8.67264	0.643774	1.34542	0.1498	0.20702	no
CAETHG_1584	CP006763:1697840-1698758	'ABRINI_FRU'	'ABRINI_RMG'	OK	5.39173	9.43386	0.807101	1.46926	0.03665	0.061265	no
CAETHG_1585	CP006763:1699100-1700390	'ABRINI_FRU'	'ABRINI_RMG'	OK	61.9726	54.8968	-0.174908	-0.384978	0.49865	0.573508	no
CAETHG_1586	CP006763:1700913-1701858	'ABRINI_FRU'	'ABRINI_RMG'	OK	48.8279	34.6267	-0.495818	-1.08835	0.06505	0.101065	no
CAETHG_1587	CP006763:1701891-1702179	'ABRINI_FRU'	'ABRINI_RMG'	OK	140.946	137.963	-0.0308604	-0.119757	0.91305	0.93215	no
CAETHG_1588	CP006763:1702525-1704977	'ABRINI_FRU'	'ABRINI_RMG'	OK	61.8424	69.1366	0.160855	0.207966	0.78665	0.829008	no
CAETHG_1589	CP006763:1702525-1704977	'ABRINI_FRU'	'ABRINI_RMG'	OK	107.486	112.725	0.0686619	0.144417	0.80355	0.843176	no
CAETHG_1590	CP006763:1705472-1707266	'ABRINI_FRU'	'ABRINI_RMG'	OK	9.26477	63.8312	2.78444	5.75821	5e-05	0.00015337	yes
CAETHG_1591	CP006763:1707555-1709346	'ABRINI_FRU'	'ABRINI_RMG'	OK	1242.28	4256.53	1.77669	2.64979	5e-05	0.00015337	yes
CAETHG_1592	CP006763:1709424-1712346	'ABRINI_FRU'	'ABRINI_RMG'	OK	113.349	200.22	0.820813	1.99978	0.0025	0.005587	yes
CAETHG_1593	CP006763:1712496-1713309	'ABRINI_FRU'	'ABRINI_RMG'	OK	74.3518	106.117	0.51322	1.12712	0.05005	0.0803617	no
CAETHG_1594	CP006763:1713483-1716921	'ABRINI_FRU'	'ABRINI_RMG'	OK	738.373	278.033	-1.40909	-2.20847	0.00015	0.000427948	yes
CAETHG_1595	CP006763:1717908-1718934	'ABRINI_FRU'	'ABRINI_RMG'	OK	47.1579	16.2095	-1.54066	-3.14465	5e-05	0.00015337	yes
CAETHG_1596	CP006763:1719380-1720013	'ABRINI_FRU'	'ABRINI_RMG'	OK	15.6762	8.38012	-0.903538	-2.00681	0.0271	0.0469501	yes
CAETHG_1597	CP006763:1720253-1720838	'ABRINI_FRU'	'ABRINI_RMG'	OK	118.392	90.0195	-0.395262	-1.34023	0.13635	0.190917	no
CAETHG_1598	CP006763:1720959-1721334	'ABRINI_FRU'	'ABRINI_RMG'	OK	59.6746	65.4001	0.132174	0.390806	0.6599	0.719497	no
CAETHG_1599	CP006763:1721335-1722601	'ABRINI_FRU'	'ABRINI_RMG'	OK	43.9844	74.2273	0.754959	1.64597	0.0042	0.00891373	yes
CAETHG_1600	CP006763:1722795-1724250	'ABRINI_FRU'	'ABRINI_RMG'	OK	26.1678	22.3536	-0.22729	-0.446574	0.38965	0.46619	no
CAETHG_1601	CP006763:1724449-1725291	'ABRINI_FRU'	'ABRINI_RMG'	OK	1428.6	3039.9	1.08942	1.92439	0.0016	0.00372219	yes
CAETHG_1603	CP006763:1725309-1725945	'ABRINI_FRU'	'ABRINI_RMG'	OK	1031.23	1521.79	0.561396	1.47488	0.0498	0.0800163	no
CAETHG_1604	CP006763:1726307-1726652	'ABRINI_FRU'	'ABRINI_RMG'	OK	2914.91	10291.4	1.81991	6.76592	5e-05	0.00015337	yes
CAETHG_1605	CP006763:1726675-1726870	'ABRINI_FRU'	'ABRINI_RMG'	OK	4125.72	12698.1	1.6219	12.6753	5e-05	0.00015337	yes
CAETHG_1606	CP006763:1727066-1729001	'ABRINI_FRU'	'ABRINI_RMG'	OK	2150.25	8135.89	1.9198	2.29793	0.00015	0.000427948	yes
CAETHG_1607	CP006763:1729038-1729413	'ABRINI_FRU'	'ABRINI_RMG'	OK	3809.22	13763.8	1.85331	4.98406	5e-05	0.00015337	yes
CAETHG_1608	CP006763:1729568-1731695	'ABRINI_FRU'	'ABRINI_RMG'	OK	4677.58	15388.2	1.718	1.65153	0.0023	0.00517635	yes
CAETHG_1609	CP006763:1731740-1732526	'ABRINI_FRU'	'ABRINI_RMG'	OK	5772.06	17104.2	1.56719	2.24269	0.00135	0.00320032	yes
CAETHG_1610	CP006763:1732636-1733989	'ABRINI_FRU'	'ABRINI_RMG'	OK	3077.28	6294.34	1.0324	1.34796	0.0228	0.0402793	yes
CAETHG_1611	CP006763:1734027-1734972	'ABRINI_FRU'	'ABRINI_RMG'	OK	3114.91	7352.11	1.23897	1.55038	0.0049	0.0102682	yes
CAETHG_1612	CP006763:1734990-1735764	'ABRINI_FRU'	'ABRINI_RMG'	OK	2727.75	4563.11	0.742305	1.11426	0.0525	0.0837794	no
CAETHG_1613	CP006763:1735902-1738201	'ABRINI_FRU'	'ABRINI_RMG'	OK	3789.11	13141.7	1.79422	1.68273	0.0042	0.00891373	yes
CAETHG_1614	CP006763:1735902-1738201	'ABRINI_FRU'	'ABRINI_RMG'	OK	2468.03	7500.44	1.60361	0.790438	0.12835	0.181443	no
CAETHG_1615	CP006763:1738224-1738875	'ABRINI_FRU'	'ABRINI_RMG'	OK	2537.45	8216.22	1.69509	2.75185	5e-05	0.00015337	yes
CAETHG_1616	CP006763:1738902-1739757	'ABRINI_FRU'	'ABRINI_RMG'	OK	3695.25	14286.8	1.95094	2.87809	5e-05	0.00015337	yes
CAETHG_1617	CP006763:1739859-1740492	'ABRINI_FRU'	'ABRINI_RMG'	OK	7435.02	28357.7	1.93133	2.44979	0.0001	0.00029355	yes
CAETHG_1618	CP006763:1740513-1742190	'ABRINI_FRU'	'ABRINI_RMG'	OK	6060.96	22713.3	1.90592	1.62822	0.00175	0.00402865	yes
CAETHG_1619	CP006763:1742190-1742973	'ABRINI_FRU'	'ABRINI_RMG'	OK	1894.61	3542.73	0.902964	1.60654	0.01015	0.0196142	yes
CAETHG_1620	CP006763:1743265-1743949	'ABRINI_FRU'	'ABRINI_RMG'	OK	6905.59	33239.4	2.26706	2.96968	5e-05	0.00015337	yes
CAETHG_1621	CP006763:1743958-1745161	'ABRINI_FRU'	'ABRINI_RMG'	OK	6738.6	28226.5	2.06653	2.17667	0.00045	0.00117913	yes
CAETHG_1622	CP006763:1745693-1746104	'ABRINI_FRU'	'ABRINI_RMG'	OK	990.08	1437.92	0.53837	1.92128	0.03815	0.0634027	no
CAETHG_1623	CP006763:1746321-1746669	'ABRINI_FRU'	'ABRINI_RMG'	OK	7697.86	12023.6	0.643343	1.94629	0.05965	0.0937287	no
CAETHG_1624	CP006763:1746756-1747230	'ABRINI_FRU'	'ABRINI_RMG'	OK	300.312	757.047	1.33392	4.88536	5e-05	0.00015337	yes
CAETHG_1625	CP006763:1747529-1748360	'ABRINI_FRU'	'ABRINI_RMG'	OK	823.357	2391.7	1.53845	2.98936	5e-05	0.00015337	yes
CAETHG_1626	CP006763:1748471-1748693	'ABRINI_FRU'	'ABRINI_RMG'	OK	5.67096	2.95307	-0.94138	-1.24866	0.53495	0.607159	no
CAETHG_1627	CP006763:1748796-1749669	'ABRINI_FRU'	'ABRINI_RMG'	OK	5.17773	0.652341	-2.98862	-2.58779	0.01425	0.0265357	yes
CAETHG_1628	CP006763:1749776-1750772	'ABRINI_FRU'	'ABRINI_RMG'	OK	2.20411	1.23459	-0.83616	-0.943607	0.2203	0.287475	no
CAETHG_1629	CP006763:1751275-1752136	'ABRINI_FRU'	'ABRINI_RMG'	OK	132.53	216.11	0.705448	1.79423	0.0054	0.0112075	yes
CAETHG_1630	CP006763:1752228-1753149	'ABRINI_FRU'	'ABRINI_RMG'	OK	111.297	151.705	0.446856	1.08294	0.07965	0.120005	no
CAETHG_1631	CP006763:1753149-1753881	'ABRINI_FRU'	'ABRINI_RMG'	OK	110.34	142.268	0.366657	0.888658	0.1599	0.218737	no
CAETHG_1632	CP006763:1754160-1754577	'ABRINI_FRU'	'ABRINI_RMG'	OK	96.8037	101.322	0.0658175	0.212492	0.8206	0.857667	no
CAETHG_1633	CP006763:1754817-1755636	'ABRINI_FRU'	'ABRINI_RMG'	OK	12.2348	5.82305	-1.07114	-2.12973	0.00835	0.0164943	yes
CAETHG_1634	CP006763:1755641-1756505	'ABRINI_FRU'	'ABRINI_RMG'	OK	9.85396	5.58845	-0.818256	-1.50015	0.0372	0.0621119	no
CAETHG_1635	CP006763:1756866-1758321	'ABRINI_FRU'	'ABRINI_RMG'	OK	84.035	42.1405	-0.995781	-2.86256	0.00015	0.000427948	yes
CAETHG_1636	CP006763:1758509-1758677	'ABRINI_FRU'	'ABRINI_RMG'	OK	88.0201	63.2882	-0.475897	-3.45972	0.4219	0.499203	no
CAETHG_1637	CP006763:1758838-1759587	'ABRINI_FRU'	'ABRINI_RMG'	OK	50.3497	22.5135	-1.16119	-2.7333	0.6197	0.683793	no
CAETHG_1638	CP006763:1758838-1759587	'ABRINI_FRU'	'ABRINI_RMG'	OK	49.0824	55.9221	0.188213	0.357772	0.50205	0.576724	no
CAETHG_1639	CP006763:1759784-1761017	'ABRINI_FRU'	'ABRINI_RMG'	OK	587.25	2437.21	2.05318	3.75969	5e-05	0.00015337	yes
CAETHG_1640	CP006763:1761275-1761635	'ABRINI_FRU'	'ABRINI_RMG'	OK	13.3598	10.0665	-0.408328	-0.901246	0.4551	0.532118	no
CAETHG_1641	CP006763:1761942-1762494	'ABRINI_FRU'	'ABRINI_RMG'	OK	2.42608	1.11715	-1.11881	-0.995182	0.24985	0.318463	no
CAETHG_1642	CP006763:1763220-1764401	'ABRINI_FRU'	'ABRINI_RMG'	OK	115.243	126.572	0.135274	0.425837	0.60235	0.668184	no
CAETHG_1643	CP006763:1763220-1764401	'ABRINI_FRU'	'ABRINI_RMG'	OK	33.2048	41.5523	0.323538	0.0951066	0.8997	0.921638	no
CAETHG_1644	CP006763:1764445-1764700	'ABRINI_FRU'	'ABRINI_RMG'	OK	153.185	226.238	0.562564	3.40724	0.06075	0.0952353	no
CAETHG_1645	CP006763:1766263-1766806	'ABRINI_FRU'	'ABRINI_RMG'	OK	6.94608	8.68379	0.322125	0.566176	0.48785	0.563403	no
CAETHG_1646	CP006763:1767574-1768057	'ABRINI_FRU'	'ABRINI_RMG'	OK	16.7409	26.2892	0.651096	1.67619	0.0749	0.113763	no
CAETHG_1647	CP006763:1768709-1768805	'ABRINI_FRU'	'ABRINI_RMG'	OK	125.99	0	#NAME?	#NAME?	0.03615	0.0605262	no
CAETHG_1648	CP006763:1770040-1771483	'ABRINI_FRU'	'ABRINI_RMG'	OK	121.158	78.5786	-0.624686	-1.43845	0.0148	0.027444	yes
CAETHG_1649	CP006763:1771905-1774602	'ABRINI_FRU'	'ABRINI_RMG'	OK	19.1657	30.8062	0.684688	1.57882	0.00865	0.0170079	yes
CAETHG_1650	CP006763:1774623-1777569	'ABRINI_FRU'	'ABRINI_RMG'	OK	13.9567	20.5147	0.555698	1.25388	0.04145	0.0681954	no
CAETHG_1651	CP006763:1777586-1781257	'ABRINI_FRU'	'ABRINI_RMG'	OK	30.6919	46.0411	0.585063	0.540336	0.4991	0.573852	no
CAETHG_1652	CP006763:1777586-1781257	'ABRINI_FRU'	'ABRINI_RMG'	OK	37.8956	66.9257	0.82053	1.73114	0.00215	0.00486646	yes
CAETHG_1653	CP006763:1781277-1781523	'ABRINI_FRU'	'ABRINI_RMG'	OK	53.4876	33.4672	-0.676459	-2.4797	0.11715	0.168412	no
CAETHG_1654	CP006763:1781698-1782379	'ABRINI_FRU'	'ABRINI_RMG'	OK	1.06523	11.0974	3.38097	3.11945	0.0016	0.00372219	yes
CAETHG_1655	CP006763:1782431-1782671	'ABRINI_FRU'	'ABRINI_RMG'	OK	116.077	662.176	2.51213	12.4976	5e-05	0.00015337	yes
CAETHG_1656	CP006763:1782705-1782930	'ABRINI_FRU'	'ABRINI_RMG'	OK	58.4681	368.311	2.6552	13.0407	5e-05	0.00015337	yes
CAETHG_1657	CP006763:1783013-1783178	'ABRINI_FRU'	'ABRINI_RMG'	OK	36.8063	84.1753	1.19345	5.56788	0.04615	0.0750559	no
CAETHG_1658	CP006763:1783218-1783458	'ABRINI_FRU'	'ABRINI_RMG'	OK	41.3397	78.6047	0.927087	3.46952	0.01765	0.0321671	yes
CAETHG_1659	CP006763:1784182-1785136	'ABRINI_FRU'	'ABRINI_RMG'	OK	62.4432	137.661	1.1405	3.0478	5e-05	0.00015337	yes
CAETHG_1660	CP006763:1785552-1785891	'ABRINI_FRU'	'ABRINI_RMG'	OK	22.1386	60.0897	1.44056	4.60705	0.0005	0.00129623	yes
CAETHG_1661	CP006763:1786093-1787326	'ABRINI_FRU'	'ABRINI_RMG'	OK	14.0197	14.1634	0.014713	0.033474	0.96095	0.969402	no
CAETHG_1662	CP006763:1787524-1787992	'ABRINI_FRU'	'ABRINI_RMG'	OK	15.0168	12.7638	-0.234526	-0.550419	0.58235	0.650655	no
CAETHG_1663	CP006763:1788010-1788313	'ABRINI_FRU'	'ABRINI_RMG'	NOTEST	1.68145	3.26879	0.959048	0	1	1	no
CAETHG_1664	CP006763:1788391-1789270	'ABRINI_FRU'	'ABRINI_RMG'	OK	14.0355	35.943	1.35662	3.79498	5e-05	0.00015337	yes
CAETHG_1665	CP006763:1789404-1790319	'ABRINI_FRU'	'ABRINI_RMG'	OK	2.93312	9.28071	1.6618	2.50441	0.0008	0.00198813	yes
CAETHG_1666	CP006763:1790350-1790563	'ABRINI_FRU'	'ABRINI_RMG'	OK	10.6531	42.9279	2.01065	5.4255	0.01745	0.0318279	yes
CAETHG_1667	CP006763:1790598-1790790	'ABRINI_FRU'	'ABRINI_RMG'	OK	0.61729	7.97724	3.69187	2.10636	0.2256	0.292859	no
CAETHG_1668	CP006763:1790962-1791178	'ABRINI_FRU'	'ABRINI_RMG'	NOTEST	0.547104	0	#NAME?	0	1	1	no
CAETHG_1669	CP006763:1791204-1791393	'ABRINI_FRU'	'ABRINI_RMG'	NOTEST	0.646501	0	#NAME?	0	1	1	no
CAETHG_1670	CP006763:1791556-1792357	'ABRINI_FRU'	'ABRINI_RMG'	OK	17.9747	12.4184	-0.533489	-1.51136	0.1318	0.185565	no
CAETHG_1671	CP006763:1792388-1793579	'ABRINI_FRU'	'ABRINI_RMG'	OK	35.6295	44.1375	0.308931	0.763928	0.2394	0.307536	no
CAETHG_1672	CP006763:1793811-1794711	'ABRINI_FRU'	'ABRINI_RMG'	OK	28.5726	8.42059	-1.76264	-4.09638	5e-05	0.00015337	yes
CAETHG_1673	CP006763:1794968-1796279	'ABRINI_FRU'	'ABRINI_RMG'	OK	100.384	179.185	0.835921	2.66547	0.00085	0.00209829	yes
CAETHG_1674	CP006763:1796336-1796792	'ABRINI_FRU'	'ABRINI_RMG'	OK	181.708	185.642	0.0309056	0.113393	0.90575	0.926677	no
CAETHG_1675	CP006763:1796796-1797952	'ABRINI_FRU'	'ABRINI_RMG'	OK	184.041	174.348	-0.0780519	-0.203863	0.8244	0.860488	no
CAETHG_1676	CP006763:1796796-1797952	'ABRINI_FRU'	'ABRINI_RMG'	OK	224.424	150.408	-0.577343	-0.717511	0.14965	0.206937	no
CAETHG_1677	CP006763:1798035-1799256	'ABRINI_FRU'	'ABRINI_RMG'	OK	205.617	85.2614	-1.26999	-2.74699	5e-05	0.00015337	yes
CAETHG_1678	CP006763:1799469-1799880	'ABRINI_FRU'	'ABRINI_RMG'	OK	172.51	675.192	1.96861	6.55685	5e-05	0.00015337	yes
CAETHG_1679	CP006763:1800018-1801131	'ABRINI_FRU'	'ABRINI_RMG'	OK	19.7697	23.2876	0.236272	0.556801	0.4105	0.487676	no
CAETHG_1680	CP006763:1801514-1801679	'ABRINI_FRU'	'ABRINI_RMG'	OK	26427.4	14560.3	-0.86	-11.2659	0.00305	0.00668714	yes
CAETHG_1681	CP006763:1801710-1802271	'ABRINI_FRU'	'ABRINI_RMG'	OK	344.766	147.317	-1.2267	-3.42082	5e-05	0.00015337	yes
CAETHG_1682	CP006763:1802430-1802586	'ABRINI_FRU'	'ABRINI_RMG'	NOTEST	7.80762	0	#NAME?	0	1	1	no
CAETHG_1683	CP006763:1802772-1803759	'ABRINI_FRU'	'ABRINI_RMG'	OK	20.6967	3.48001	-2.57224	-4.9951	5e-05	0.00015337	yes
CAETHG_1684	CP006763:1804154-1804973	'ABRINI_FRU'	'ABRINI_RMG'	OK	98.0623	28.8264	-1.76631	-4.81477	5e-05	0.00015337	yes
CAETHG_1685	CP006763:1805194-1806787	'ABRINI_FRU'	'ABRINI_RMG'	OK	111.297	82.3453	-0.434662	-0.969715	0.088	0.130989	no
CAETHG_1686	CP006763:1806849-1807860	'ABRINI_FRU'	'ABRINI_RMG'	OK	69.7423	6.07186	-3.52182	-6.11855	5e-05	0.00015337	yes
CAETHG_1687	CP006763:1808222-1816859	'ABRINI_FRU'	'ABRINI_RMG'	OK	12.1944	10.2666	-0.248258	-0.541809	0.331	0.405408	no
CAETHG_1688	CP006763:1816955-1818251	'ABRINI_FRU'	'ABRINI_RMG'	OK	97.2547	82.2107	-0.242441	-0.549061	0.3372	0.411946	no
CAETHG_1689	CP006763:1818336-1818807	'ABRINI_FRU'	'ABRINI_RMG'	OK	51.5215	33.7548	-0.610082	-1.6783	0.04805	0.0775849	no
CAETHG_1690	CP006763:1818812-1819538	'ABRINI_FRU'	'ABRINI_RMG'	OK	111.841	30.3088	-1.88365	-4.44108	5e-05	0.00015337	yes
CAETHG_1691	CP006763:1819891-1820932	'ABRINI_FRU'	'ABRINI_RMG'	OK	107.013	100.97	-0.0838547	-0.201772	0.74405	0.792635	no
CAETHG_1692	CP006763:1821148-1823278	'ABRINI_FRU'	'ABRINI_RMG'	OK	276.674	223.786	-0.306063	-0.680007	0.25545	0.324447	no
CAETHG_1693	CP006763:1823383-1825237	'ABRINI_FRU'	'ABRINI_RMG'	OK	65.2671	78.1564	0.260009	0.541469	0.3071	0.380195	no
CAETHG_1694	CP006763:1825843-1827274	'ABRINI_FRU'	'ABRINI_RMG'	OK	79.8197	31.0581	-1.36177	-3.07007	5e-05	0.00015337	yes
CAETHG_1695	CP006763:1827756-1829358	'ABRINI_FRU'	'ABRINI_RMG'	OK	23.8867	20.6942	-0.20698	-0.531656	0.4533	0.530283	no
CAETHG_1696	CP006763:1829940-1830306	'ABRINI_FRU'	'ABRINI_RMG'	OK	8.71935	2.33505	-1.90077	-2.62831	0.0797	0.120005	no
CAETHG_1697	CP006763:1830679-1831462	'ABRINI_FRU'	'ABRINI_RMG'	OK	6.4269	0.995832	-2.69015	-2.73438	0.0093	0.0181274	yes
CAETHG_1698	CP006763:1831493-1832426	'ABRINI_FRU'	'ABRINI_RMG'	OK	4.46606	1.77519	-1.33103	-1.5515	0.0224	0.0396459	yes
CAETHG_1699	CP006763:1832564-1832717	'ABRINI_FRU'	'ABRINI_RMG'	OK	111.828	33.7486	-1.72839	-8.87022	0.0169	0.0309527	yes
CAETHG_1700	CP006763:1832729-1832852	'ABRINI_FRU'	'ABRINI_RMG'	OK	173.758	28.8419	-2.59084	-15.1308	0.03875	0.0642417	no
CAETHG_1701	CP006763:1832913-1834236	'ABRINI_FRU'	'ABRINI_RMG'	OK	3.05125	4.47231	0.551622	0.880313	0.1722	0.232732	no
CAETHG_1702	CP006763:1834269-1835499	'ABRINI_FRU'	'ABRINI_RMG'	OK	1.02342	2.86265	1.48395	1.53546	0.0179	0.0325658	yes
CAETHG_1703	CP006763:1835685-1838017	'ABRINI_FRU'	'ABRINI_RMG'	OK	4.6214	28.0917	2.60374	2.82016	0.00145	0.00341199	yes
CAETHG_1704	CP006763:1835685-1838017	'ABRINI_FRU'	'ABRINI_RMG'	OK	8.21709	28.6752	1.8031	2.99673	5e-05	0.00015337	yes
CAETHG_1705	CP006763:1839055-1839616	'ABRINI_FRU'	'ABRINI_RMG'	OK	31.3344	11.2065	-1.48341	-4.54673	0.00115	0.00276506	yes
CAETHG_1706	CP006763:1839781-1840210	'ABRINI_FRU'	'ABRINI_RMG'	OK	21.3034	4.67141	-2.18915	-4.31055	0.00415	0.00881904	yes
CAETHG_1707	CP006763:1840653-1841016	'ABRINI_FRU'	'ABRINI_RMG'	OK	10.8888	5.68263	-0.938217	-1.66501	0.156	0.214271	no
CAETHG_1708	CP006763:1841017-1841572	'ABRINI_FRU'	'ABRINI_RMG'	OK	18.3046	33.8409	0.886561	2.12144	0.0072	0.0144593	yes
CAETHG_1709	CP006763:1841924-1842605	'ABRINI_FRU'	'ABRINI_RMG'	OK	24.6571	29.1779	0.242872	0.841188	0.45735	0.534149	no
CAETHG_1710	CP006763:1842711-1843002	'ABRINI_FRU'	'ABRINI_RMG'	NOTEST	3.53821	2.53115	-0.483227	0	1	1	no
CAETHG_1711	CP006763:1843235-1844324	'ABRINI_FRU'	'ABRINI_RMG'	OK	2.54285	1.18736	-1.09869	-1.37642	0.11735	0.168636	no
CAETHG_1712	CP006763:1844793-1846056	'ABRINI_FRU'	'ABRINI_RMG'	OK	53.8806	22.8795	-1.23571	-4.76877	5e-05	0.00015337	yes
CAETHG_1713	CP006763:1846072-1847892	'ABRINI_FRU'	'ABRINI_RMG'	OK	131.588	114.348	-0.2026	-0.530037	0.48465	0.560384	no
CAETHG_1714	CP006763:1846072-1847892	'ABRINI_FRU'	'ABRINI_RMG'	OK	35.2851	22.946	-0.620815	-0.873775	0.3155	0.389166	no
CAETHG_1715	CP006763:1847893-1848592	'ABRINI_FRU'	'ABRINI_RMG'	OK	93.2159	36.1409	-1.36694	-5.05	5e-05	0.00015337	yes
CAETHG_1716	CP006763:1848688-1850686	'ABRINI_FRU'	'ABRINI_RMG'	OK	13.0786	14.5939	0.158158	0.343059	0.5676	0.637092	no
CAETHG_1717	CP006763:1851031-1851694	'ABRINI_FRU'	'ABRINI_RMG'	OK	2300.32	707.59	-1.70085	-5.89427	5e-05	0.00015337	yes
CAETHG_1718	CP006763:1851853-1852618	'ABRINI_FRU'	'ABRINI_RMG'	OK	13.8272	1.41443	-3.28922	-4.00234	0.0006	0.00153329	yes
CAETHG_1719	CP006763:1852708-1854954	'ABRINI_FRU'	'ABRINI_RMG'	OK	13.6227	9.69924	-0.490072	-1.13605	0.07655	0.115978	no
CAETHG_1721	CP006763:1854956-1855379	'ABRINI_FRU'	'ABRINI_RMG'	OK	61.7907	10.8616	-2.50815	-6.14632	5e-05	0.00015337	yes
CAETHG_1722	CP006763:1855765-1856945	'ABRINI_FRU'	'ABRINI_RMG'	OK	5.37059	2.4328	-1.14246	-1.2119	0.29685	0.36926	no
CAETHG_1723	CP006763:1855765-1856945	'ABRINI_FRU'	'ABRINI_RMG'	OK	3.72515	1.85202	-1.0082	-1.01267	0.1082	0.157022	no
CAETHG_1724	CP006763:1857092-1857647	'ABRINI_FRU'	'ABRINI_RMG'	OK	12.7172	10.8869	-0.224187	-0.410809	0.5466	0.618179	no
CAETHG_1725	CP006763:1857911-1858361	'ABRINI_FRU'	'ABRINI_RMG'	OK	2.52061	3.0394	0.270012	0.287607	0.73345	0.784184	no
CAETHG_1726	CP006763:1858416-1858914	'ABRINI_FRU'	'ABRINI_RMG'	OK	11.3206	9.32326	-0.280049	-0.660061	0.5701	0.639453	no
CAETHG_1727	CP006763:1859313-1860255	'ABRINI_FRU'	'ABRINI_RMG'	OK	6.67275	4.88944	-0.448611	-0.912279	0.3142	0.38773	no
CAETHG_1728	CP006763:1860444-1861029	'ABRINI_FRU'	'ABRINI_RMG'	OK	17.7528	21.8422	0.299068	0.700616	0.3787	0.455226	no
CAETHG_1729	CP006763:1861357-1863136	'ABRINI_FRU'	'ABRINI_RMG'	OK	90.7837	125.922	0.472024	1.08837	0.06875	0.105881	no
CAETHG_1730	CP006763:1863361-1864072	'ABRINI_FRU'	'ABRINI_RMG'	OK	408.034	436.131	0.0960714	0.297811	0.7066	0.761439	no
CAETHG_1731	CP006763:1864143-1865424	'ABRINI_FRU'	'ABRINI_RMG'	OK	16.9731	10.2819	-0.72314	-1.67907	0.02285	0.0403614	yes
CAETHG_1733	CP006763:1865844-1867344	'ABRINI_FRU'	'ABRINI_RMG'	OK	10.1927	2.70974	-1.91131	-3.48735	5e-05	0.00015337	yes
CAETHG_1734	CP006763:1867377-1869740	'ABRINI_FRU'	'ABRINI_RMG'	OK	7.04875	3.96279	-0.830852	-1.31035	0.0964	0.142036	no
CAETHG_1735	CP006763:1867377-1869740	'ABRINI_FRU'	'ABRINI_RMG'	OK	6.42114	4.07464	-0.656157	-0.875321	0.133	0.186956	no
CAETHG_1736	CP006763:1870022-1870412	'ABRINI_FRU'	'ABRINI_RMG'	NOTEST	2.04398	0	#NAME?	0	1	1	no
CAETHG_1737	CP006763:1870438-1871488	'ABRINI_FRU'	'ABRINI_RMG'	OK	12.8581	4.47062	-1.52413	-2.862	0.00025	0.000685617	yes
CAETHG_1738	CP006763:1871686-1874600	'ABRINI_FRU'	'ABRINI_RMG'	OK	42.9624	78.8832	0.876642	2.54893	0.00175	0.00402865	yes
CAETHG_1739	CP006763:1871686-1874600	'ABRINI_FRU'	'ABRINI_RMG'	OK	3.31126	0.944928	-1.80911	-0.739176	0.35755	0.432842	no
CAETHG_1740	CP006763:1874889-1876560	'ABRINI_FRU'	'ABRINI_RMG'	OK	25.99	24.074	-0.110485	-0.248461	0.67985	0.737812	no
CAETHG_1741	CP006763:1876574-1877690	'ABRINI_FRU'	'ABRINI_RMG'	OK	39.3401	52.697	0.421719	1.05182	0.11005	0.159424	no
CAETHG_1742	CP006763:1877709-1878660	'ABRINI_FRU'	'ABRINI_RMG'	OK	48.8259	64.0923	0.392506	1.18359	0.14365	0.199893	no
CAETHG_1743	CP006763:1878798-1879563	'ABRINI_FRU'	'ABRINI_RMG'	OK	11.3718	7.90515	-0.524596	-1.07136	0.17305	0.233688	no
CAETHG_1744	CP006763:1879605-1880940	'ABRINI_FRU'	'ABRINI_RMG'	OK	7.68954	4.21518	-0.867303	-1.6855	0.01955	0.0351716	yes
CAETHG_1745	CP006763:1881177-1882854	'ABRINI_FRU'	'ABRINI_RMG'	OK	6.06028	8.37408	0.466545	0.99388	0.1479	0.204863	no
CAETHG_1746	CP006763:1882882-1884043	'ABRINI_FRU'	'ABRINI_RMG'	OK	2.48261	2.50432	0.0125614	0.0165183	0.9777	0.981895	no
CAETHG_1747	CP006763:1884071-1885184	'ABRINI_FRU'	'ABRINI_RMG'	OK	3.84422	4.6174	0.26439	0.475576	0.55085	0.621821	no
CAETHG_1748	CP006763:1885269-1885719	'ABRINI_FRU'	'ABRINI_RMG'	OK	12.1106	5.81396	-1.05868	-2.02073	0.06265	0.0978261	no
CAETHG_1749	CP006763:1885730-1886231	'ABRINI_FRU'	'ABRINI_RMG'	OK	5.6975	0.612608	-3.21729	-2.34601	0.0745	0.113291	no
CAETHG_1750	CP006763:1886312-1887215	'ABRINI_FRU'	'ABRINI_RMG'	OK	16.7988	8.88322	-0.919204	-2.11009	0.0102	0.0197042	yes
CAETHG_1751	CP006763:1887393-1887666	'ABRINI_FRU'	'ABRINI_RMG'	OK	189.007	274.517	0.538452	3.13218	0.05825	0.0917804	no
CAETHG_1752	CP006763:1887687-1887855	'ABRINI_FRU'	'ABRINI_RMG'	OK	360.005	392.25	0.123758	1.01527	0.6821	0.739888	no
CAETHG_1753	CP006763:1888062-1888536	'ABRINI_FRU'	'ABRINI_RMG'	OK	141.395	126.669	-0.158662	-0.541956	0.5473	0.618849	no
CAETHG_1754	CP006763:1888569-1890708	'ABRINI_FRU'	'ABRINI_RMG'	OK	59.2283	27.3165	-1.11651	-2.4337	0.0001	0.00029355	yes
CAETHG_1755	CP006763:1890833-1891067	'ABRINI_FRU'	'ABRINI_RMG'	OK	1359.94	713.558	-0.930445	-5.14006	0.00035	0.000934175	yes
CAETHG_1756	CP006763:1891188-1892487	'ABRINI_FRU'	'ABRINI_RMG'	OK	555.348	320.376	-0.793627	-1.49358	0.0045	0.00948548	yes
CAETHG_1757	CP006763:1892581-1894117	'ABRINI_FRU'	'ABRINI_RMG'	OK	251.016	179.058	-0.487354	-1.03061	0.0619	0.096866	no
CAETHG_1758	CP006763:1894142-1894889	'ABRINI_FRU'	'ABRINI_RMG'	OK	466.256	556.025	0.254028	0.629813	0.3307	0.405084	no
CAETHG_1759	CP006763:1894910-1896107	'ABRINI_FRU'	'ABRINI_RMG'	OK	311.155	307.147	-0.0187072	-0.0414083	0.94495	0.957473	no
CAETHG_1760	CP006763:1896227-1897235	'ABRINI_FRU'	'ABRINI_RMG'	OK	1477.4	666.904	-1.14751	-2.43567	0.0005	0.00129623	yes
CAETHG_1761	CP006763:1897287-1898313	'ABRINI_FRU'	'ABRINI_RMG'	OK	237.688	42.0411	-2.4992	-5.67691	5e-05	0.00015337	yes
CAETHG_1762	CP006763:1898447-1899815	'ABRINI_FRU'	'ABRINI_RMG'	OK	28.2973	89.5337	1.66176	4.09917	5e-05	0.00015337	yes
CAETHG_1763	CP006763:1899981-1900821	'ABRINI_FRU'	'ABRINI_RMG'	OK	204.784	60.9802	-1.74769	-4.64168	5e-05	0.00015337	yes
CAETHG_1764	CP006763:1900831-1901299	'ABRINI_FRU'	'ABRINI_RMG'	OK	629.449	870.353	0.467511	1.6082	0.08655	0.129032	no
CAETHG_1765	CP006763:1901894-1902611	'ABRINI_FRU'	'ABRINI_RMG'	OK	238.955	34.0919	-2.80924	-7.10062	5e-05	0.00015337	yes
CAETHG_1766	CP006763:1902787-1903357	'ABRINI_FRU'	'ABRINI_RMG'	OK	66.6163	147.804	1.14974	4.32404	5e-05	0.00015337	yes
CAETHG_1767	CP006763:1903373-1904261	'ABRINI_FRU'	'ABRINI_RMG'	OK	80.7607	126.172	0.643673	1.84287	0.0143	0.0266158	yes
CAETHG_1768	CP006763:1904771-1905167	'ABRINI_FRU'	'ABRINI_RMG'	OK	45.0515	5.65215	-2.9947	-7.32491	0.0025	0.005587	yes
CAETHG_1769	CP006763:1905548-1906709	'ABRINI_FRU'	'ABRINI_RMG'	OK	53.4397	18.751	-1.51094	-3.37615	5e-05	0.00015337	yes
CAETHG_1770	CP006763:1906877-1908116	'ABRINI_FRU'	'ABRINI_RMG'	OK	198.004	205.592	0.0542594	0.108168	0.8448	0.877151	no
CAETHG_1771	CP006763:1908731-1909375	'ABRINI_FRU'	'ABRINI_RMG'	OK	209.772	208.975	-0.00549382	-0.0161181	0.9841	0.986595	no
CAETHG_1772	CP006763:1908731-1909375	'ABRINI_FRU'	'ABRINI_RMG'	OK	236.07	241.241	0.0312549	0.0306239	0.967	0.974135	no
CAETHG_1773	CP006763:1909390-1910092	'ABRINI_FRU'	'ABRINI_RMG'	OK	255.224	339.711	0.412544	1.21537	0.10875	0.157681	no
CAETHG_1774	CP006763:1910155-1911133	'ABRINI_FRU'	'ABRINI_RMG'	OK	21.3578	3.03105	-2.81687	-4.80919	5e-05	0.00015337	yes
CAETHG_1775	CP006763:1911158-1911752	'ABRINI_FRU'	'ABRINI_RMG'	OK	140.205	46.2206	-1.60093	-3.90249	5e-05	0.00015337	yes
CAETHG_1776	CP006763:1911972-1912884	'ABRINI_FRU'	'ABRINI_RMG'	OK	374.711	94.4627	-1.98796	-4.31861	5e-05	0.00015337	yes
CAETHG_1777	CP006763:1913454-1914282	'ABRINI_FRU'	'ABRINI_RMG'	OK	29.3582	3.28185	-3.16118	-6.41107	5e-05	0.00015337	yes
CAETHG_1778	CP006763:1914689-1915964	'ABRINI_FRU'	'ABRINI_RMG'	OK	414.963	148.53	-1.48223	-3.4559	5e-05	0.00015337	yes
CAETHG_1779	CP006763:1916033-1916579	'ABRINI_FRU'	'ABRINI_RMG'	OK	458.954	1124.22	1.2925	3.43113	5e-05	0.00015337	yes
CAETHG_1780	CP006763:1916837-1917224	'ABRINI_FRU'	'ABRINI_RMG'	NOTEST	0.643273	0	#NAME?	0	1	1	no
CAETHG_1781	CP006763:1917420-1918719	'ABRINI_FRU'	'ABRINI_RMG'	OK	3.34963	5.88959	0.814163	1.25449	0.0306	0.0523652	no
CAETHG_1782	CP006763:1918850-1920120	'ABRINI_FRU'	'ABRINI_RMG'	OK	12.4977	37.4022	1.58147	3.94282	5e-05	0.00015337	yes
CAETHG_1783	CP006763:1918850-1920120	'ABRINI_FRU'	'ABRINI_RMG'	OK	4.28092	20.5882	2.26583	1.50667	0.02365	0.0416207	yes
CAETHG_1784	CP006763:1920188-1921904	'ABRINI_FRU'	'ABRINI_RMG'	OK	5.37691	5.18813	-0.0515628	-0.0886875	0.86885	0.897248	no
CAETHG_1785	CP006763:1921935-1922946	'ABRINI_FRU'	'ABRINI_RMG'	OK	2.55642	4.40495	0.785	0.942496	0.0706	0.108294	no
CAETHG_1786	CP006763:1922961-1923750	'ABRINI_FRU'	'ABRINI_RMG'	OK	1.77811	4.66808	1.39249	1.66708	0.0336	0.0568543	no
CAETHG_1787	CP006763:1923762-1924905	'ABRINI_FRU'	'ABRINI_RMG'	OK	2.58502	3.14848	0.28448	0.388701	0.5417	0.613666	no
CAETHG_1788	CP006763:1924923-1926147	'ABRINI_FRU'	'ABRINI_RMG'	NOTEST	0.870203	0.46711	-0.897588	0	1	1	no
CAETHG_1789	CP006763:1926237-1927410	'ABRINI_FRU'	'ABRINI_RMG'	OK	8.3208	6.30467	-0.400301	-0.744003	0.24275	0.310795	no
CAETHG_1790	CP006763:1927746-1928730	'ABRINI_FRU'	'ABRINI_RMG'	OK	69.6377	22.6318	-1.62152	-3.73036	5e-05	0.00015337	yes
CAETHG_1791	CP006763:1928957-1929479	'ABRINI_FRU'	'ABRINI_RMG'	OK	15.2247	8.02091	-0.924574	-2.00414	0.04605	0.0749145	no
CAETHG_1792	CP006763:1929580-1929997	'ABRINI_FRU'	'ABRINI_RMG'	OK	123.429	68.8343	-0.842484	-2.83644	0.0043	0.00910238	yes
CAETHG_1793	CP006763:1930220-1930643	'ABRINI_FRU'	'ABRINI_RMG'	OK	19.2203	20.9391	0.123567	0.302672	0.7488	0.796512	no
CAETHG_1794	CP006763:1930782-1931016	'ABRINI_FRU'	'ABRINI_RMG'	OK	38.0203	26.6165	-0.514445	-1.65319	0.2975	0.369787	no
CAETHG_1795	CP006763:1931155-1932238	'ABRINI_FRU'	'ABRINI_RMG'	OK	87.8488	128.881	0.552945	1.32674	0.0302	0.0517579	no
CAETHG_1796	CP006763:1932288-1932987	'ABRINI_FRU'	'ABRINI_RMG'	OK	124.845	258.876	1.05213	2.82199	0.00015	0.000427948	yes
CAETHG_1797	CP006763:1932999-1935735	'ABRINI_FRU'	'ABRINI_RMG'	OK	43.8372	88.1396	1.00763	2.15611	0.00025	0.000685617	yes
CAETHG_1798	CP006763:1935763-1936117	'ABRINI_FRU'	'ABRINI_RMG'	OK	3.41475	5.54315	0.698928	0.986992	0.44185	0.518794	no
CAETHG_1799	CP006763:1936152-1936776	'ABRINI_FRU'	'ABRINI_RMG'	OK	2.8869	4.99482	0.790911	0.999713	0.16325	0.222524	no
CAETHG_1800	CP006763:1936802-1938866	'ABRINI_FRU'	'ABRINI_RMG'	OK	2.1987	4.72431	1.10345	1.69365	0.004	0.00853348	yes
CAETHG_1801	CP006763:1938890-1940564	'ABRINI_FRU'	'ABRINI_RMG'	OK	6.69436	5.40216	-0.309409	-0.585381	0.33985	0.414697	no
CAETHG_1802	CP006763:1940935-1942877	'ABRINI_FRU'	'ABRINI_RMG'	OK	88.1505	145.699	0.724951	1.65206	0.00495	0.0103636	yes
CAETHG_1803	CP006763:1940935-1942877	'ABRINI_FRU'	'ABRINI_RMG'	OK	143.945	61.3762	-1.22977	-0.187957	0.69215	0.748681	no
CAETHG_1804	CP006763:1943143-1944013	'ABRINI_FRU'	'ABRINI_RMG'	OK	528.951	365.479	-0.533348	-1.22577	0.04295	0.0703705	no
CAETHG_1805	CP006763:1944016-1944583	'ABRINI_FRU'	'ABRINI_RMG'	OK	954.631	844.785	-0.17636	-0.483403	0.50065	0.575289	no
CAETHG_1806	CP006763:1944636-1945569	'ABRINI_FRU'	'ABRINI_RMG'	OK	22.6509	23.1394	0.0307815	0.0637363	0.91125	0.931058	no
CAETHG_1807	CP006763:1945573-1948154	'ABRINI_FRU'	'ABRINI_RMG'	OK	15.4315	25.8898	0.746506	1.36374	0.0396	0.0654333	no
CAETHG_1808	CP006763:1945573-1948154	'ABRINI_FRU'	'ABRINI_RMG'	OK	5.8747	13.6626	1.21765	1.47503	0.00745	0.0148909	yes
CAETHG_1809	CP006763:1948224-1949331	'ABRINI_FRU'	'ABRINI_RMG'	OK	28.6601	59.119	1.04458	2.39451	0.0001	0.00029355	yes
CAETHG_1810	CP006763:1949716-1950364	'ABRINI_FRU'	'ABRINI_RMG'	OK	315.098	276.147	-0.190363	-0.563085	0.4602	0.53715	no
CAETHG_1811	CP006763:1950464-1950824	'ABRINI_FRU'	'ABRINI_RMG'	OK	442.14	858.664	0.957589	3.91754	0.00025	0.000685617	yes
CAETHG_1812	CP006763:1951059-1951977	'ABRINI_FRU'	'ABRINI_RMG'	OK	531.851	297.972	-0.835845	-2.44891	0.00145	0.00341199	yes
CAETHG_1813	CP006763:1952442-1953591	'ABRINI_FRU'	'ABRINI_RMG'	OK	5.60115	5.89593	0.0739965	0.126672	0.8452	0.877487	no
CAETHG_1814	CP006763:1953987-1955178	'ABRINI_FRU'	'ABRINI_RMG'	OK	272.502	290.997	0.0947364	0.247149	0.7202	0.772538	no
CAETHG_1815	CP006763:1955183-1955954	'ABRINI_FRU'	'ABRINI_RMG'	OK	250.319	331.693	0.406082	1.48502	0.12135	0.173407	no
CAETHG_1816	CP006763:1956237-1956534	'ABRINI_FRU'	'ABRINI_RMG'	OK	17.4755	51.029	1.54599	4.03986	0.00085	0.00209829	yes
CAETHG_1817	CP006763:1956608-1956899	'ABRINI_FRU'	'ABRINI_RMG'	OK	15.129	73.9621	2.28947	5.82492	5e-05	0.00015337	yes
CAETHG_1818	CP006763:1956947-1957598	'ABRINI_FRU'	'ABRINI_RMG'	OK	5.13891	19.8389	1.9488	3.3008	0.0001	0.00029355	yes
CAETHG_1819	CP006763:1957599-1959153	'ABRINI_FRU'	'ABRINI_RMG'	OK	3.83514	13.5429	1.82018	3.0699	5e-05	0.00015337	yes
CAETHG_1820	CP006763:1959204-1959951	'ABRINI_FRU'	'ABRINI_RMG'	OK	3.8765	11.3669	1.55202	2.16432	0.0005	0.00129623	yes
CAETHG_1821	CP006763:1959990-1960680	'ABRINI_FRU'	'ABRINI_RMG'	OK	4.41033	14.3377	1.70086	2.91621	0.0006	0.00153329	yes
CAETHG_1822	CP006763:1960717-1961266	'ABRINI_FRU'	'ABRINI_RMG'	OK	3.191	14.2757	2.16148	2.97587	0.0011	0.0026571	yes
CAETHG_1823	CP006763:1961267-1962596	'ABRINI_FRU'	'ABRINI_RMG'	OK	5.83426	17.5961	1.59263	2.85978	5e-05	0.00015337	yes
CAETHG_1824	CP006763:1962613-1963179	'ABRINI_FRU'	'ABRINI_RMG'	OK	3.25083	8.9114	1.45484	1.79916	0.34335	0.418212	no
CAETHG_1825	CP006763:1962613-1963179	'ABRINI_FRU'	'ABRINI_RMG'	OK	3.50925	9.97784	1.50756	0.87878	0.0978	0.14384	no
CAETHG_1826	CP006763:1963195-1964790	'ABRINI_FRU'	'ABRINI_RMG'	OK	1.78016	4.01805	1.17449	0.934636	0.1188	0.170357	no
CAETHG_1827	CP006763:1963195-1964790	'ABRINI_FRU'	'ABRINI_RMG'	OK	5.39187	10.0871	0.903648	1.0867	0.06835	0.105364	no
CAETHG_1828	CP006763:1965037-1965988	'ABRINI_FRU'	'ABRINI_RMG'	OK	6.39752	12.8457	1.0057	1.79403	0.00505	0.0105517	yes
CAETHG_1829	CP006763:1966121-1968671	'ABRINI_FRU'	'ABRINI_RMG'	OK	7.32324	21.5261	1.55553	3.15272	5e-05	0.00015337	yes
CAETHG_1830	CP006763:1968761-1970258	'ABRINI_FRU'	'ABRINI_RMG'	OK	5.6287	19.0618	1.75981	3.33962	5e-05	0.00015337	yes
CAETHG_1831	CP006763:1970344-1970647	'ABRINI_FRU'	'ABRINI_RMG'	OK	4.49983	34.6062	2.94309	4.8218	0.0019	0.00434432	yes
CAETHG_1832	CP006763:1970686-1970983	'ABRINI_FRU'	'ABRINI_RMG'	OK	1.74863	8.29653	2.24628	2.1364	0.07395	0.112589	no
CAETHG_1833	CP006763:1971122-1971389	'ABRINI_FRU'	'ABRINI_RMG'	OK	2.03485	33.7103	4.0502	5.18656	0.05065	0.081098	no
CAETHG_1834	CP006763:1971393-1972482	'ABRINI_FRU'	'ABRINI_RMG'	OK	1.57717	13.451	3.0923	4.14039	5e-05	0.00015337	yes
CAETHG_1835	CP006763:1972665-1972929	'ABRINI_FRU'	'ABRINI_RMG'	OK	4.78553	19.9405	2.05895	3.66085	0.03695	0.0617484	no
CAETHG_1836	CP006763:1972933-1974016	'ABRINI_FRU'	'ABRINI_RMG'	OK	1.69011	11.1202	2.718	3.48341	5e-05	0.00015337	yes
CAETHG_1837	CP006763:1974461-1975922	'ABRINI_FRU'	'ABRINI_RMG'	OK	8.95041	8.85371	-0.0156722	-0.0316766	0.96025	0.969053	no
CAETHG_1838	CP006763:1975938-1976553	'ABRINI_FRU'	'ABRINI_RMG'	OK	10.569	27.2366	1.3657	3.27677	0.0006	0.00153329	yes
CAETHG_1839	CP006763:1976741-1978546	'ABRINI_FRU'	'ABRINI_RMG'	OK	15.5109	22.639	0.545529	1.15205	0.14255	0.198604	no
CAETHG_1840	CP006763:1976741-1978546	'ABRINI_FRU'	'ABRINI_RMG'	OK	29.8307	32.0833	0.105024	0.140434	0.8304	0.865333	no
CAETHG_1841	CP006763:1978647-1979865	'ABRINI_FRU'	'ABRINI_RMG'	OK	3197.89	25491.3	2.99482	3.69614	5e-05	0.00015337	yes
CAETHG_1842	CP006763:1980249-1980771	'ABRINI_FRU'	'ABRINI_RMG'	OK	34.0701	17.6729	-0.94697	-2.66906	0.00795	0.0157748	yes
CAETHG_1843	CP006763:1980879-1982612	'ABRINI_FRU'	'ABRINI_RMG'	OK	7.67755	2.01288	-1.93138	-2.69793	0.00255	0.00568545	yes
CAETHG_1844	CP006763:1980879-1982612	'ABRINI_FRU'	'ABRINI_RMG'	OK	5.99886	2.94407	-1.02688	-1.01771	0.093	0.137575	no
CAETHG_1845	CP006763:1982646-1983393	'ABRINI_FRU'	'ABRINI_RMG'	OK	6.07326	4.69382	-0.371709	-0.707075	0.46925	0.545714	no
CAETHG_1846	CP006763:1983419-1985394	'ABRINI_FRU'	'ABRINI_RMG'	OK	5.03285	1.85771	-1.43785	-1.91184	0.0807	0.121272	no
CAETHG_1847	CP006763:1983419-1985394	'ABRINI_FRU'	'ABRINI_RMG'	OK	6.12638	4.81854	-0.346439	-0.375595	0.50565	0.580278	no
CAETHG_1848	CP006763:1985493-1986936	'ABRINI_FRU'	'ABRINI_RMG'	OK	3.55699	3.27377	-0.119703	-0.236864	0.7909	0.832263	no
CAETHG_1849	CP006763:1987312-1988464	'ABRINI_FRU'	'ABRINI_RMG'	OK	2.52719	0.502782	-2.32953	-1.87276	0.0189	0.0341468	yes
CAETHG_1850	CP006763:1988756-1988888	'ABRINI_FRU'	'ABRINI_RMG'	NOTEST	7.53567	7.0481	-0.0965027	0	1	1	no
CAETHG_1851	CP006763:1989159-1989992	'ABRINI_FRU'	'ABRINI_RMG'	OK	48.2641	12.0398	-2.00314	-5.17733	5e-05	0.00015337	yes
CAETHG_1852	CP006763:1989159-1989992	'ABRINI_FRU'	'ABRINI_RMG'	OK	5.822	0	#NAME?	#NAME?	0.2372	0.30512	no
CAETHG_1854	CP006763:1990239-1990671	'ABRINI_FRU'	'ABRINI_RMG'	OK	4.08309	0.288356	-3.82374	-1.61139	0.2252	0.292472	no
CAETHG_1855	CP006763:1990732-1992277	'ABRINI_FRU'	'ABRINI_RMG'	OK	158.492	68.0341	-1.22008	-2.9156	5e-05	0.00015337	yes
CAETHG_1856	CP006763:1992495-1992771	'ABRINI_FRU'	'ABRINI_RMG'	OK	32.8077	23.7261	-0.467563	-1.4549	0.30995	0.38331	no
CAETHG_1857	CP006763:1993405-1994533	'ABRINI_FRU'	'ABRINI_RMG'	OK	23.3733	17.5953	-0.409675	-1.03843	0.16605	0.225777	no
CAETHG_1858	CP006763:1994804-1995566	'ABRINI_FRU'	'ABRINI_RMG'	OK	12.4479	1.20752	-3.36578	-3.94349	0.0014	0.00330587	yes
CAETHG_1859	CP006763:1995671-1996850	'ABRINI_FRU'	'ABRINI_RMG'	NOTEST	1.1331	0.782385	-0.53432	0	1	1	no
CAETHG_1860	CP006763:1996972-1997809	'ABRINI_FRU'	'ABRINI_RMG'	OK	19.4807	9.54518	-1.0292	-2.43981	0.004	0.00853348	yes
CAETHG_1861	CP006763:1997921-1999331	'ABRINI_FRU'	'ABRINI_RMG'	OK	10.0766	8.76128	-0.2018	-0.396707	0.5121	0.586272	no
CAETHG_1862	CP006763:1999409-2000525	'ABRINI_FRU'	'ABRINI_RMG'	OK	41.4987	57.3014	0.465503	1.08672	0.07875	0.118934	no
CAETHG_1863	CP006763:2000679-2001204	'ABRINI_FRU'	'ABRINI_RMG'	OK	58.2827	66.3519	0.187069	0.545551	0.49855	0.573507	no
CAETHG_1864	CP006763:2001780-2002575	'ABRINI_FRU'	'ABRINI_RMG'	OK	3.04612	0.32559	-3.22585	-1.96885	0.07445	0.11323	no
CAETHG_1866	CP006763:2004763-2006352	'ABRINI_FRU'	'ABRINI_RMG'	OK	7.89066	12.3143	0.642117	0.756646	0.588	0.655754	no
CAETHG_1867	CP006763:2004763-2006352	'ABRINI_FRU'	'ABRINI_RMG'	OK	10.0122	17.2723	0.786703	1.28577	0.00975	0.0189338	yes
CAETHG_1868	CP006763:2006355-2008442	'ABRINI_FRU'	'ABRINI_RMG'	OK	2.53861	4.25824	0.74622	1.00686	0.08345	0.124783	no
CAETHG_1869	CP006763:2006355-2008442	'ABRINI_FRU'	'ABRINI_RMG'	OK	1.44704	1.77616	0.295656	0.188644	0.7346	0.784862	no
CAETHG_1870	CP006763:2008730-2010146	'ABRINI_FRU'	'ABRINI_RMG'	OK	5.06885	4.35081	-0.220374	-0.385208	0.5475	0.618953	no
CAETHG_1871	CP006763:2010287-2010731	'ABRINI_FRU'	'ABRINI_RMG'	OK	29.8434	32.6595	0.130092	0.351188	0.6913	0.747903	no
CAETHG_1872	CP006763:2010793-2012844	'ABRINI_FRU'	'ABRINI_RMG'	OK	5.20345	3.72897	-0.480693	-0.869361	0.2374	0.305308	no
CAETHG_1873	CP006763:2010793-2012844	'ABRINI_FRU'	'ABRINI_RMG'	OK	1.51293	0.641699	-1.23738	-0.52883	0.4036	0.480624	no
CAETHG_1874	CP006763:2013114-2014011	'ABRINI_FRU'	'ABRINI_RMG'	OK	2.4044	0.878642	-1.45233	-1.43918	0.0948	0.139949	no
CAETHG_1875	CP006763:2014026-2014647	'ABRINI_FRU'	'ABRINI_RMG'	NOTEST	1.30591	0.879965	-0.569538	0	1	1	no
CAETHG_1876	CP006763:2014918-2015623	'ABRINI_FRU'	'ABRINI_RMG'	OK	9.82662	5.67615	-0.791782	-1.54125	0.0735	0.112008	no
CAETHG_1877	CP006763:2015855-2016680	'ABRINI_FRU'	'ABRINI_RMG'	OK	56.1325	172.269	1.61776	4.36045	5e-05	0.00015337	yes
CAETHG_1878	CP006763:2016865-2017402	'ABRINI_FRU'	'ABRINI_RMG'	OK	48.2645	121.947	1.33722	3.50986	5e-05	0.00015337	yes
CAETHG_1879	CP006763:2017420-2018815	'ABRINI_FRU'	'ABRINI_RMG'	OK	2.50758	3.25013	0.374201	0.585761	0.40195	0.478908	no
CAETHG_1880	CP006763:2019562-2020210	'ABRINI_FRU'	'ABRINI_RMG'	OK	3.16053	1.00049	-1.65946	-1.4331	0.08195	0.122925	no
CAETHG_1881	CP006763:2020649-2022107	'ABRINI_FRU'	'ABRINI_RMG'	OK	6.51991	9.26701	0.507252	0.967478	0.11085	0.160502	no
CAETHG_1882	CP006763:2022157-2023417	'ABRINI_FRU'	'ABRINI_RMG'	OK	1.30648	1.81109	0.471169	0.52166	0.41215	0.489433	no
CAETHG_1883	CP006763:2024035-2024410	'ABRINI_FRU'	'ABRINI_RMG'	OK	25.61	25.1266	-0.027492	-0.0693253	0.9377	0.951438	no
CAETHG_1884	CP006763:2024586-2026404	'ABRINI_FRU'	'ABRINI_RMG'	OK	102.492	67.9822	-0.592282	-1.53531	0.02095	0.0373912	yes
CAETHG_1885	CP006763:2027379-2029206	'ABRINI_FRU'	'ABRINI_RMG'	OK	203.699	273.837	0.426878	0.883797	0.1118	0.161714	no
CAETHG_1886	CP006763:2029761-2029956	'ABRINI_FRU'	'ABRINI_RMG'	OK	24.6871	5.33666	-2.20975	-4.56699	0.10355	0.151096	no
CAETHG_1887	CP006763:2030084-2031434	'ABRINI_FRU'	'ABRINI_RMG'	OK	124.441	87.861	-0.502167	-1.12364	0.0536	0.0852856	no
CAETHG_1888	CP006763:2031744-2035407	'ABRINI_FRU'	'ABRINI_RMG'	OK	50.009	59.3772	0.247722	0.274379	0.5828	0.651094	no
CAETHG_1889	CP006763:2031744-2035407	'ABRINI_FRU'	'ABRINI_RMG'	OK	64.167	242.619	1.91879	3.1548	5e-05	0.00015337	yes
CAETHG_1890	CP006763:2031744-2035407	'ABRINI_FRU'	'ABRINI_RMG'	OK	36.2765	82.1864	1.17987	0.952571	0.1223	0.174503	no
CAETHG_1891	CP006763:2035670-2036195	'ABRINI_FRU'	'ABRINI_RMG'	OK	29.202	13.1077	-1.15565	-2.76865	0.0027	0.00598267	yes
CAETHG_1892	CP006763:2036239-2037097	'ABRINI_FRU'	'ABRINI_RMG'	OK	258.758	768.218	1.56991	3.49411	5e-05	0.00015337	yes
CAETHG_1893	CP006763:2037194-2037512	'ABRINI_FRU'	'ABRINI_RMG'	OK	551.817	348.39	-0.663487	-2.63963	0.0111	0.0212424	yes
CAETHG_1894	CP006763:2037622-2039606	'ABRINI_FRU'	'ABRINI_RMG'	OK	75.3177	55.9853	-0.427941	-0.859297	0.2624	0.332024	no
CAETHG_1895	CP006763:2037622-2039606	'ABRINI_FRU'	'ABRINI_RMG'	OK	84.5168	100.987	0.25686	0.37425	0.51005	0.584392	no
CAETHG_1896	CP006763:2039801-2041415	'ABRINI_FRU'	'ABRINI_RMG'	OK	58.7666	45.0721	-0.382762	-0.785957	0.13935	0.194595	no
CAETHG_1897	CP006763:2041600-2042296	'ABRINI_FRU'	'ABRINI_RMG'	OK	19.1531	17.3932	-0.139047	-0.3412	0.6797	0.737719	no
CAETHG_1898	CP006763:2042308-2043349	'ABRINI_FRU'	'ABRINI_RMG'	OK	16.7609	19.0698	0.186196	0.417109	0.52105	0.594619	no
CAETHG_1899	CP006763:2043382-2044924	'ABRINI_FRU'	'ABRINI_RMG'	OK	13.5003	18.6702	0.467749	0.861658	0.0952	0.140467	no
CAETHG_1900	CP006763:2044988-2045861	'ABRINI_FRU'	'ABRINI_RMG'	OK	14.7965	15.6155	0.0777238	0.156096	0.79995	0.840321	no
CAETHG_1901	CP006763:2045874-2046138	'ABRINI_FRU'	'ABRINI_RMG'	OK	26.509	33.7497	0.348388	1.03343	0.43345	0.510185	no
CAETHG_1902	CP006763:2046228-2046795	'ABRINI_FRU'	'ABRINI_RMG'	OK	46.9417	32.3634	-0.536507	-1.2629	0.06605	0.102355	no
CAETHG_1903	CP006763:2046858-2047701	'ABRINI_FRU'	'ABRINI_RMG'	OK	60.7855	34.9481	-0.798512	-1.80117	0.0032	0.00698664	yes
CAETHG_1904	CP006763:2047901-2049143	'ABRINI_FRU'	'ABRINI_RMG'	OK	41.0593	37.9844	-0.112299	-0.227601	0.66555	0.724624	no
CAETHG_1905	CP006763:2049178-2050636	'ABRINI_FRU'	'ABRINI_RMG'	OK	32.5549	35.4839	0.12429	0.253287	0.63405	0.696411	no
CAETHG_1906	CP006763:2050657-2052070	'ABRINI_FRU'	'ABRINI_RMG'	OK	21.9257	29.9909	0.4519	0.904386	0.0908	0.134633	no
CAETHG_1907	CP006763:2052119-2052524	'ABRINI_FRU'	'ABRINI_RMG'	OK	37.8197	39.8194	0.0743334	0.201189	0.8172	0.854684	no
CAETHG_1908	CP006763:2052655-2053633	'ABRINI_FRU'	'ABRINI_RMG'	OK	22.902	14.3613	-0.67329	-1.46114	0.0278	0.0480685	yes
CAETHG_1909	CP006763:2054030-2055443	'ABRINI_FRU'	'ABRINI_RMG'	OK	20.7421	18.6184	-0.155834	-0.348477	0.5723	0.6413	no
CAETHG_1910	CP006763:2055469-2057212	'ABRINI_FRU'	'ABRINI_RMG'	OK	19.527	7.76252	-1.33087	-2.74697	5e-05	0.00015337	yes
CAETHG_1911	CP006763:2057390-2058185	'ABRINI_FRU'	'ABRINI_RMG'	OK	2.11364	2.02641	-0.0608053	-0.0608877	0.9136	0.932379	no
CAETHG_1912	CP006763:2058550-2059243	'ABRINI_FRU'	'ABRINI_RMG'	OK	33.0064	4.81006	-2.77862	-4.90278	5e-05	0.00015337	yes
CAETHG_1913	CP006763:2059386-2059779	'ABRINI_FRU'	'ABRINI_RMG'	OK	1420.08	616.71	-1.2033	-3.8197	5e-05	0.00015337	yes
CAETHG_1914	CP006763:2059804-2060257	'ABRINI_FRU'	'ABRINI_RMG'	OK	879.353	343.596	-1.35573	-4.37169	5e-05	0.00015337	yes
CAETHG_1915	CP006763:2060423-2061967	'ABRINI_FRU'	'ABRINI_RMG'	OK	61.7308	14.0667	-2.13371	-3.08613	5e-05	0.00015337	yes
CAETHG_1916	CP006763:2060423-2061967	'ABRINI_FRU'	'ABRINI_RMG'	OK	77.0038	32.2885	-1.25391	-2.14645	0.0003	0.000809958	yes
CAETHG_1917	CP006763:2061979-2063664	'ABRINI_FRU'	'ABRINI_RMG'	OK	155.186	89.8673	-0.78813	-1.29317	0.0443	0.072355	no
CAETHG_1918	CP006763:2061979-2063664	'ABRINI_FRU'	'ABRINI_RMG'	OK	205.186	62.8518	-1.7069	-2.08821	5e-05	0.00015337	yes
CAETHG_1919	CP006763:2063758-2064100	'ABRINI_FRU'	'ABRINI_RMG'	OK	1873.4	1390.05	-0.430518	-1.67787	0.0979	0.143932	no
CAETHG_1920	CP006763:2064156-2065104	'ABRINI_FRU'	'ABRINI_RMG'	OK	425.653	221.867	-0.939981	-2.23291	0.00045	0.00117913	yes
CAETHG_1921	CP006763:2065166-2065787	'ABRINI_FRU'	'ABRINI_RMG'	OK	852.15	478.282	-0.833247	-2.40964	0.00185	0.00424183	yes
CAETHG_1922	CP006763:2065866-2066178	'ABRINI_FRU'	'ABRINI_RMG'	OK	170.155	86.9975	-0.967806	-3.41029	0.0012	0.00287864	yes
CAETHG_1923	CP006763:2066223-2066601	'ABRINI_FRU'	'ABRINI_RMG'	OK	740.618	245.016	-1.59585	-5.94046	5e-05	0.00015337	yes
CAETHG_1924	CP006763:2066788-2066902	'ABRINI_FRU'	'ABRINI_RMG'	OK	420.029	34.754	-3.59524	-33.2494	0.069	0.10618	no
CAETHG_1925	CP006763:2066917-2067136	'ABRINI_FRU'	'ABRINI_RMG'	OK	303.889	80.2429	-1.9211	-11.5671	5e-05	0.00015337	yes
CAETHG_1926	CP006763:2067444-2068098	'ABRINI_FRU'	'ABRINI_RMG'	OK	168.627	34.022	-2.3093	-5.48542	5e-05	0.00015337	yes
CAETHG_1927	CP006763:2068123-2069404	'ABRINI_FRU'	'ABRINI_RMG'	OK	181.119	44.0959	-2.03822	-4.58116	5e-05	0.00015337	yes
CAETHG_1928	CP006763:2069405-2069846	'ABRINI_FRU'	'ABRINI_RMG'	OK	499.152	85.3752	-2.54759	-7.36912	5e-05	0.00015337	yes
CAETHG_1929	CP006763:2069868-2070048	'ABRINI_FRU'	'ABRINI_RMG'	OK	180.654	50.4184	-1.84121	-11.8953	0.0016	0.00372219	yes
CAETHG_1930	CP006763:2070060-2070558	'ABRINI_FRU'	'ABRINI_RMG'	OK	302.282	61.9374	-2.28701	-6.03109	5e-05	0.00015337	yes
CAETHG_1931	CP006763:2070573-2070933	'ABRINI_FRU'	'ABRINI_RMG'	OK	270.145	58.2078	-2.21445	-8.83347	5e-05	0.00015337	yes
CAETHG_1932	CP006763:2070951-2071966	'ABRINI_FRU'	'ABRINI_RMG'	OK	402.975	85.9869	-2.2285	-4.99458	5e-05	0.00015337	yes
CAETHG_1933	CP006763:2070951-2071966	'ABRINI_FRU'	'ABRINI_RMG'	OK	539.714	118.399	-2.18855	-3.28049	5e-05	0.00015337	yes
CAETHG_1934	CP006763:2071998-2072184	'ABRINI_FRU'	'ABRINI_RMG'	OK	60.0587	21.9493	-1.4522	-5.71176	0.03775	0.0628473	no
CAETHG_1935	CP006763:2072196-2072742	'ABRINI_FRU'	'ABRINI_RMG'	OK	216.529	50.5242	-2.09951	-6.62064	5e-05	0.00015337	yes
CAETHG_1936	CP006763:2072764-2073082	'ABRINI_FRU'	'ABRINI_RMG'	OK	399.854	129.403	-1.62761	-7.23488	5e-05	0.00015337	yes
CAETHG_1937	CP006763:2073100-2073469	'ABRINI_FRU'	'ABRINI_RMG'	OK	334.044	68.6448	-2.28281	-6.78809	5e-05	0.00015337	yes
CAETHG_1938	CP006763:2073497-2073752	'ABRINI_FRU'	'ABRINI_RMG'	OK	348.216	99.6427	-1.80515	-9.65549	5e-05	0.00015337	yes
CAETHG_1939	CP006763:2073772-2074418	'ABRINI_FRU'	'ABRINI_RMG'	OK	415.047	137.147	-1.59755	-5.69479	0.0107	0.0205489	yes
CAETHG_1940	CP006763:2073772-2074418	'ABRINI_FRU'	'ABRINI_RMG'	OK	285.951	78.0701	-1.87293	-2.88005	5e-05	0.00015337	yes
CAETHG_1941	CP006763:2074435-2075107	'ABRINI_FRU'	'ABRINI_RMG'	OK	282.102	88.2061	-1.67726	-4.32818	5e-05	0.00015337	yes
CAETHG_1942	CP006763:2075125-2075461	'ABRINI_FRU'	'ABRINI_RMG'	OK	226.865	101.051	-1.16675	-4.21676	0.0001	0.00029355	yes
CAETHG_1943	CP006763:2075482-2075779	'ABRINI_FRU'	'ABRINI_RMG'	OK	242.995	93.8153	-1.37303	-6.6277	5e-05	0.00015337	yes
CAETHG_1944	CP006763:2075890-2076724	'ABRINI_FRU'	'ABRINI_RMG'	OK	503.958	156.068	-1.69113	-3.47171	5e-05	0.00015337	yes
CAETHG_1945	CP006763:2076778-2077698	'ABRINI_FRU'	'ABRINI_RMG'	OK	674.865	257.996	-1.38725	-3.613	0.00815	0.0161326	yes
CAETHG_1946	CP006763:2076778-2077698	'ABRINI_FRU'	'ABRINI_RMG'	OK	515.488	193.333	-1.41485	-2.70809	5e-05	0.00015337	yes
CAETHG_1947	CP006763:2077722-2078352	'ABRINI_FRU'	'ABRINI_RMG'	OK	355.634	126.207	-1.4946	-3.67875	5e-05	0.00015337	yes
CAETHG_1948	CP006763:2078421-2078730	'ABRINI_FRU'	'ABRINI_RMG'	OK	418.808	96.3999	-2.11919	-8.93481	5e-05	0.00015337	yes
CAETHG_1949	CP006763:2079077-2080271	'ABRINI_FRU'	'ABRINI_RMG'	OK	389.559	296.366	-0.394465	-0.686676	0.16085	0.219801	no
CAETHG_1950	CP006763:2080310-2082380	'ABRINI_FRU'	'ABRINI_RMG'	OK	574.45	423.329	-0.440401	-0.767317	0.15455	0.21256	no
CAETHG_1951	CP006763:2082458-2082929	'ABRINI_FRU'	'ABRINI_RMG'	OK	1197.7	777.313	-0.623696	-2.11373	0.0189	0.0341468	yes
CAETHG_1952	CP006763:2083084-2083462	'ABRINI_FRU'	'ABRINI_RMG'	OK	1749.43	924.15	-0.920684	-3.33387	0.0004	0.001059	yes
CAETHG_1953	CP006763:2083542-2083785	'ABRINI_FRU'	'ABRINI_RMG'	OK	361.37	139.171	-1.37662	-8.23844	5e-05	0.00015337	yes
CAETHG_1954	CP006763:2083898-2087435	'ABRINI_FRU'	'ABRINI_RMG'	OK	228.791	172.491	-0.407509	-0.754373	0.15725	0.215601	no
CAETHG_1955	CP006763:2087452-2091181	'ABRINI_FRU'	'ABRINI_RMG'	OK	239.985	133.14	-0.850001	-1.45301	0.00365	0.00786138	yes
CAETHG_1956	CP006763:2091489-2091861	'ABRINI_FRU'	'ABRINI_RMG'	OK	606.761	266.044	-1.18947	-3.39934	5e-05	0.00015337	yes
CAETHG_1957	CP006763:2091896-2092400	'ABRINI_FRU'	'ABRINI_RMG'	OK	347.525	155.899	-1.1565	-3.44797	5e-05	0.00015337	yes
CAETHG_1958	CP006763:2092599-2093289	'ABRINI_FRU'	'ABRINI_RMG'	OK	558.237	227.348	-1.29598	-3.1775	5e-05	0.00015337	yes
CAETHG_1959	CP006763:2093345-2093771	'ABRINI_FRU'	'ABRINI_RMG'	OK	445.856	175.373	-1.34615	-3.76452	5e-05	0.00015337	yes
CAETHG_1960	CP006763:2093841-2094363	'ABRINI_FRU'	'ABRINI_RMG'	OK	408.345	118.569	-1.78406	-5.77696	5e-05	0.00015337	yes
CAETHG_1961	CP006763:2094404-2094635	'ABRINI_FRU'	'ABRINI_RMG'	OK	343.023	78.7864	-2.12229	-10.4912	5e-05	0.00015337	yes
CAETHG_1962	CP006763:2094678-2094828	'ABRINI_FRU'	'ABRINI_RMG'	OK	634.391	238.347	-1.41231	-17.8088	0.0003	0.000809958	yes
CAETHG_1963	CP006763:2095012-2096206	'ABRINI_FRU'	'ABRINI_RMG'	OK	665.614	808.879	0.281239	0.468736	0.3501	0.425259	no
CAETHG_1964	CP006763:2096532-2097174	'ABRINI_FRU'	'ABRINI_RMG'	OK	536.872	162.021	-1.72839	-5.1053	5e-05	0.00015337	yes
CAETHG_1965	CP006763:2097247-2098557	'ABRINI_FRU'	'ABRINI_RMG'	OK	41.3384	26.4973	-0.641636	-0.922614	0.28875	0.360749	no
CAETHG_1966	CP006763:2097247-2098557	'ABRINI_FRU'	'ABRINI_RMG'	OK	67.0696	50.7254	-0.402952	-0.712816	0.1946	0.258228	no
CAETHG_1967	CP006763:2098867-2099293	'ABRINI_FRU'	'ABRINI_RMG'	OK	60.8973	81.1379	0.413997	1.28332	0.1483	0.205293	no
CAETHG_1968	CP006763:2099318-2100716	'ABRINI_FRU'	'ABRINI_RMG'	OK	73.5319	100.863	0.455953	1.11298	0.07335	0.111809	no
CAETHG_1969	CP006763:2100997-2101690	'ABRINI_FRU'	'ABRINI_RMG'	OK	200.85	236.55	0.236027	0.62859	0.3576	0.432856	no
CAETHG_1970	CP006763:2101693-2102821	'ABRINI_FRU'	'ABRINI_RMG'	OK	201.068	260.705	0.374735	0.900008	0.1522	0.209831	no
CAETHG_1971	CP006763:2103124-2103529	'ABRINI_FRU'	'ABRINI_RMG'	OK	773.566	434.655	-0.831653	-3.87078	0.0014	0.00330587	yes
CAETHG_1972	CP006763:2103568-2104633	'ABRINI_FRU'	'ABRINI_RMG'	OK	78.6151	47.8723	-0.715615	-1.89568	0.00725	0.0145368	yes
CAETHG_1973	CP006763:2104647-2106003	'ABRINI_FRU'	'ABRINI_RMG'	OK	62.3415	43.3355	-0.524645	-1.14091	0.0473	0.0766653	no
CAETHG_1974	CP006763:2106108-2108550	'ABRINI_FRU'	'ABRINI_RMG'	OK	577.855	1111.79	0.944098	1.44632	0.00945	0.0183948	yes
CAETHG_1975	CP006763:2108570-2109611	'ABRINI_FRU'	'ABRINI_RMG'	OK	376.094	605.352	0.686681	1.7025	0.01225	0.0231993	yes
CAETHG_1976	CP006763:2109613-2110162	'ABRINI_FRU'	'ABRINI_RMG'	OK	267.72	240.575	-0.154241	-0.548039	0.5552	0.625869	no
CAETHG_1977	CP006763:2110235-2110718	'ABRINI_FRU'	'ABRINI_RMG'	OK	120.46	35.0788	-1.77988	-5.23559	5e-05	0.00015337	yes
CAETHG_1978	CP006763:2110924-2111164	'ABRINI_FRU'	'ABRINI_RMG'	OK	9.23689	4.67362	-0.982868	-1.93766	0.4398	0.516757	no
CAETHG_1979	CP006763:2111294-2113379	'ABRINI_FRU'	'ABRINI_RMG'	OK	96.4607	1325.37	3.78031	6.452	5e-05	0.00015337	yes
CAETHG_1980	CP006763:2119269-2120646	'ABRINI_FRU'	'ABRINI_RMG'	OK	148.009	219.734	0.570076	1.28368	0.0254	0.0443533	yes
CAETHG_1981	CP006763:2121108-2122500	'ABRINI_FRU'	'ABRINI_RMG'	OK	89.3566	81.2891	-0.136513	-0.316352	0.5907	0.658317	no
CAETHG_1982	CP006763:2123041-2124553	'ABRINI_FRU'	'ABRINI_RMG'	OK	776.115	593.287	-0.38754	-0.773523	0.1923	0.255679	no
CAETHG_1983	CP006763:2124569-2125049	'ABRINI_FRU'	'ABRINI_RMG'	OK	626.609	402.976	-0.636871	-2.01501	0.0141	0.0263076	yes
CAETHG_1984	CP006763:2125218-2126040	'ABRINI_FRU'	'ABRINI_RMG'	OK	46.6627	29.7926	-0.647314	-2.01915	0.02775	0.0479893	yes
CAETHG_1985	CP006763:2126098-2127061	'ABRINI_FRU'	'ABRINI_RMG'	OK	18.9087	25.5165	0.432381	0.963207	0.13305	0.187004	no
CAETHG_1986	CP006763:2127069-2127849	'ABRINI_FRU'	'ABRINI_RMG'	OK	35.7407	41.7052	0.222658	0.513956	0.41805	0.495363	no
CAETHG_1987	CP006763:2128163-2129972	'ABRINI_FRU'	'ABRINI_RMG'	OK	495.11	643.204	0.377527	0.653571	0.2151	0.281812	no
CAETHG_1988	CP006763:2130054-2131993	'ABRINI_FRU'	'ABRINI_RMG'	OK	198.008	59.0851	-1.74469	-2.72916	0.00195	0.00444889	yes
CAETHG_1989	CP006763:2130054-2131993	'ABRINI_FRU'	'ABRINI_RMG'	OK	167.461	68.7217	-1.28498	-2.59631	5e-05	0.00015337	yes
CAETHG_1990	CP006763:2132420-2134808	'ABRINI_FRU'	'ABRINI_RMG'	OK	184.613	154.566	-0.256274	-0.505765	0.35345	0.428783	no
CAETHG_1991	CP006763:2135693-2136104	'ABRINI_FRU'	'ABRINI_RMG'	OK	5170.04	1926.5	-1.42419	-4.34158	5e-05	0.00015337	yes
CAETHG_1992	CP006763:2136290-2136563	'ABRINI_FRU'	'ABRINI_RMG'	OK	48.9828	37.7144	-0.37716	-1.41717	0.3726	0.44874	no
CAETHG_1993	CP006763:2136690-2137101	'ABRINI_FRU'	'ABRINI_RMG'	OK	27.6429	13.6902	-1.01376	-2.73631	0.0219	0.0388689	yes
CAETHG_1994	CP006763:2137127-2137418	'ABRINI_FRU'	'ABRINI_RMG'	OK	64.5778	33.0012	-0.96852	-4.10191	0.0222	0.0393527	yes
CAETHG_1995	CP006763:2137487-2137736	'ABRINI_FRU'	'ABRINI_RMG'	OK	23.4662	20.1246	-0.221624	-0.609182	0.68215	0.739888	no
CAETHG_1996	CP006763:2137795-2138071	'ABRINI_FRU'	'ABRINI_RMG'	OK	5502.92	3372.09	-0.706557	-3.95068	0.00995	0.0192797	yes
CAETHG_1997	CP006763:2138351-2139797	'ABRINI_FRU'	'ABRINI_RMG'	OK	238.394	96.0563	-1.31139	-3.06589	5e-05	0.00015337	yes
CAETHG_1998	CP006763:2139811-2141347	'ABRINI_FRU'	'ABRINI_RMG'	OK	10.122	4.15449	-1.28475	-2.38875	0.00025	0.000685617	yes
CAETHG_1999	CP006763:2141498-2142056	'ABRINI_FRU'	'ABRINI_RMG'	OK	72.3602	17.4684	-2.05045	-4.92048	5e-05	0.00015337	yes
CAETHG_2000	CP006763:2142214-2143240	'ABRINI_FRU'	'ABRINI_RMG'	OK	568.952	338.434	-0.749434	-1.7547	0.0054	0.0112075	yes
CAETHG_2001	CP006763:2143315-2146837	'ABRINI_FRU'	'ABRINI_RMG'	OK	19.6326	52.9584	1.43161	3.25108	5e-05	0.00015337	yes
CAETHG_2002	CP006763:2147111-2147687	'ABRINI_FRU'	'ABRINI_RMG'	OK	97.34	57.9673	-0.747794	-2.18351	0.00565	0.0116756	yes
CAETHG_2003	CP006763:2147778-2148957	'ABRINI_FRU'	'ABRINI_RMG'	OK	380.923	697.294	0.872266	1.8514	0.00255	0.00568545	yes
CAETHG_2004	CP006763:2149039-2150455	'ABRINI_FRU'	'ABRINI_RMG'	OK	38.9802	101.634	1.38257	3.68745	5e-05	0.00015337	yes
CAETHG_2005	CP006763:2150455-2151142	'ABRINI_FRU'	'ABRINI_RMG'	OK	46.0636	108.294	1.23326	3.34231	5e-05	0.00015337	yes
CAETHG_2006	CP006763:2151356-2152316	'ABRINI_FRU'	'ABRINI_RMG'	OK	353.72	451.349	0.351636	0.752115	0.18125	0.243357	no
CAETHG_2007	CP006763:2152338-2153709	'ABRINI_FRU'	'ABRINI_RMG'	OK	132.049	47.8716	-1.46382	-3.54125	5e-05	0.00015337	yes
CAETHG_2008	CP006763:2153892-2154183	'ABRINI_FRU'	'ABRINI_RMG'	OK	5339.99	3937.18	-0.439675	-1.4942	0.1406	0.196149	no
CAETHG_2009	CP006763:2154283-2155111	'ABRINI_FRU'	'ABRINI_RMG'	OK	45.925	21.2814	-1.10969	-2.49086	0.00015	0.000427948	yes
CAETHG_2010	CP006763:2155362-2156736	'ABRINI_FRU'	'ABRINI_RMG'	OK	84.9294	58.8522	-0.529166	-1.46582	0.0413	0.0679779	no
CAETHG_2011	CP006763:2156802-2157126	'ABRINI_FRU'	'ABRINI_RMG'	OK	16.0546	4.78013	-1.74786	-3.05961	0.0277	0.0479245	yes
CAETHG_2012	CP006763:2157688-2159585	'ABRINI_FRU'	'ABRINI_RMG'	NOTEST	5.95931	0	#NAME?	0	1	1	no
CAETHG_2013	CP006763:2157688-2159585	'ABRINI_FRU'	'ABRINI_RMG'	OK	14.903	5.91711	-1.33264	-2.08212	0.0173	0.0316096	yes
CAETHG_2014	CP006763:2157688-2159585	'ABRINI_FRU'	'ABRINI_RMG'	OK	15.8966	7.06712	-1.16953	-2.01474	0.00515	0.0107333	yes
CAETHG_2015	CP006763:2159781-2160435	'ABRINI_FRU'	'ABRINI_RMG'	OK	44.0707	33.808	-0.382457	-1.08869	0.19605	0.260002	no
CAETHG_2016	CP006763:2160499-2160898	'ABRINI_FRU'	'ABRINI_RMG'	OK	98.4333	26.7779	-1.8781	-6.99661	0.0001	0.00029355	yes
CAETHG_2017	CP006763:2160936-2161647	'ABRINI_FRU'	'ABRINI_RMG'	OK	38.4569	12.2892	-1.64586	-3.29472	5e-05	0.00015337	yes
[truncated: 2,116 more rows]

## Sheet: TABLE S4 Protein detected
Gene	%Cov	%Cov(50)	%Cov(95)	Function
CAETHG_1370	17.18	4.405	4.405	Uroporphyrinogen decarboxylase (URO-D)
CAETHG_3016	86.08	75.77	75	Protein DJ-1
CAETHG_3892	33.66	6.931	6.931	Peptide deformylase
CAETHG_1694	77.95	30.91	28.86	Proline--tRNA ligase
CAETHG_0133	97.92	97.23	97	UPF0271 protein TON_1051
CAETHG_3984	45.48	9.605	9.605	ORF
CAETHG_0950	92.88	76.08	73.54	ORF
CAETHG_2609	62.63	49.68	49.68	dTDP-3-amino-3,6-dideoxy-alpha-D-galactopyranose transaminase
CAETHG_2005	65.34	42.44	42.44	Transcriptional regulatory protein SrrA
CAETHG_3164	44.2	7.837	7.837	Bifunctional protein PyrR
CAETHG_3827	62.71	21.27	19.34	Uncharacterized protein HI_1472
CAETHG_3923	76.67	45	45	Pyrimidine nucleoside transport protein
CAETHG_1672	89.8	70.41	70.41	Periplasmic solute binding protein family
CAETHG_0251	62.1	39.65	35.86	ORF
CAETHG_1652	74.05	52.97	52.97	ORF
CAETHG_3552	34.14	18.43	16.92	Helix-turn-helix type 3
CAETHG_4026	65.65	40.7	40.7	Penicillinase repressor
CAETHG_1938	69.6	56.59	56.59	30S ribosomal protein S17
CAETHG_3916	60.89	12.61	8.662	Yip1 domain
CAETHG_0147	84.38	59.76	50.45	Uncharacterized protein YeiR
CAETHG_0156	59.65	26.51	26.51	ORF
CAETHG_2591	58.26	14.29	12.18	Probable capsular polysaccharide biosynthesis protein YwqC
CAETHG_0607	74.04	28.94	22.55	Putative thiamine biosynthesis protein HI_0357
CAETHG_1957	100	76.19	33.33	50S ribosomal protein L10
CAETHG_3168	85.96	85.96	85.96	Fatty acid repression mutant protein 2
CAETHG_1475	75.2	43.57	43.57	ORF
CAETHG_2783	79.87	47.65	33.56	Nodulation efficiency, NfeD
CAETHG_0224	86.18	76.97	76.97	ORF
CAETHG_0260	72.59	27.92	22.34	Spermidine/putrescine-binding periplasmic protein
CAETHG_2814	38.74	26.7	23.04	Rod shape-determining protein MreB
CAETHG_1478	72.29	40.26	40.26	Dihydroorotate dehydrogenase B (NAD(+)), electron transfer subunit
CAETHG_2343	90.07	53.79	53.79	ATP synthase subunit a
CAETHG_3273	28.79	5.447	5.058	Flavin reductase-like, FMN-binding
CAETHG_0172	42.53	5.46	2.874	Uncharacterised protein family HutD/Ves
CAETHG_3261	63.01	16.44	14.16	Imidazole glycerol phosphate synthase subunit HisH
CAETHG_0665	69.79	66.51	66.51	Probable fructose-6-phosphate aldolase
CAETHG_0369	66.93	33.23	31.36	Hydrogenase expression/formation protein HypE
CAETHG_0371	28.75	16.82	13.76	Hydrogenase expression/formation protein, HupF/HypC
CAETHG_3901	26.29	5.603	5.603	Propanediol utilization protein PduU
CAETHG_2058	15.42	5.286	5.286	Palmitoyl-acyl carrier protein thioesterase, chloroplastic
CAETHG_0019	73.88	23.02	23.02	Uncharacterized isomerase PA2770
CAETHG_1818	82.78	78.64	77.65	Phosphate propanoyltransferase
CAETHG_2120	24.94	9.524	9.524	Membrane protein insertase YidC
CAETHG_2050	66.08	38.77	32.16	3-oxoacyl-[acyl-carrier-protein] synthase 3
CAETHG_1285	35.29	14.07	10.23	Probable transcriptional regulatory protein CTC_02215
CAETHG_0191	82.96	38.52	38.52	Methylcobamide:CoM methyltransferase MtbA
CAETHG_0492	73.22	49	49	Homoserine O-succinyltransferase
CAETHG_2543	34.48	32.18	32.18	ORF
CAETHG_0083	41.14	7.967	7.967	Electron transport protein HydN
CAETHG_3316	38.4	13.07	13.07	Uncharacterized protein CA_C1697
CAETHG_2106	92.19	71.88	71.88	Protein of unknown function DUF951
CAETHG_1980	65.19	9.392	9.392	UDP-N-acetylmuramoylalanine--D-glutamate ligase
CAETHG_1639	72.26	64.19	64.19	ORF
CAETHG_0136	64.05	39.54	37.91	Protein of unknown function DUF2284, metal-binding
CAETHG_0716	65.35	16.34	16.34	Iron-sulfur flavoprotein MJ1083
CAETHG_2699	27.16	2.16	2.16	Uncharacterised conserved protein UCP037246
CAETHG_3443	62.28	31.25	29.91	2-dehydro-3-deoxy-6-phosphogalactonate aldolase
CAETHG_3971	60.87	21.2	19.57	Protein of unknown function DUF2935
CAETHG_2849	43.81	15.46	15.46	Dimethylamine corrinoid protein 2
CAETHG_2952	77.39	69.35	68.2	Phosphoribosylglycinamide formyltransferase
CAETHG_1943	81.67	39.17	39.17	30S ribosomal protein S19
CAETHG_2666	39.43	10.57	10.57	ORF
CAETHG_0302	51.03	35.12	33.68	ORF
CAETHG_1873	55.28	20.96	20.96	Sensory transduction protein regX3
CAETHG_1309	20.82	4.985	4.985	Maltose-binding periplasmic protein
CAETHG_3638	79.19	58.39	58.39	Protein of unknown function DUF2082, nucleic-acid-binding, Zn-ribbon
CAETHG_2285	65.65	17.94	17.94	ORF
CAETHG_1515	62.96	45.37	45.37	ORF
CAETHG_2419	71.36	41.82	41.82	mRNA interferase MazF
CAETHG_3292	69	51	51	HTH-type transcriptional regulator CymR
CAETHG_0340	73.6	57.58	57.58	Transcription regulator PadR N-terminal
CAETHG_3444	54.69	38.87	37.53	L-galactonate transporter
CAETHG_1589	46.58	5.479	3.881	Sensor protein LytS
CAETHG_2590	78.57	63.49	63.49	ORF
CAETHG_1308	59.78	19.55	19.55	UDP-N-acetyl-D-glucosamine 6-dehydrogenase
CAETHG_2753	43.85	15.16	12.3	Isocitrate dehydrogenase [NAD] catalytic subunit 5, mitochondrial
CAETHG_0273	31.74	9.581	9.581	Bacteriohemerythrin
CAETHG_1003	71.82	49.83	48.11	Chemotaxis protein CheY
CAETHG_2350	62.08	40.96	40.16	ATP synthase epsilon chain
CAETHG_0451	57.88	37.36	37.36	Putative diaminopropionate ammonia-lyase
CAETHG_2290	38.15	10.08	10.08	UPF0173 metal-dependent hydrolase Tneu_1348
CAETHG_2793	60.8	7.035	7.035	Protein FdhD homolog
CAETHG_3430	43.24	32.43	32.43	Methyl-accepting chemotaxis protein McpC
CAETHG_3045	58.1	18.14	15.77	FlgN-like domain
CAETHG_3399	86.46	72.92	55.21	Ribosome-binding factor A
CAETHG_1371	48.06	6.36	6.36	5'-nucleotidase SurE
CAETHG_3348	79.25	63.52	57.23	50S ribosomal protein L28
CAETHG_3628	64.95	40.99	39.01	Putative NADH dehydrogenase/NAD(P)H nitroreductase AF_2267
CAETHG_1937	62.96	30.04	27.98	50S ribosomal protein L14
CAETHG_2586	54.51	12.94	12.94	ORF
CAETHG_3254	68.09	53.19	53.19	KHG/KDPG aldolase
CAETHG_3996	79.95	42.92	41.04	Uncharacterized glycosylase YvbX
CAETHG_0755	66.88	30.89	30.89	Glutamine--tRNA ligase
CAETHG_1612	55.91	3.494	3.494	Uncharacterized ATP-binding protein MJ0685
CAETHG_3344	64.71	19.12	13.97	Probable serine/threonine-protein kinase CPE1738
CAETHG_1033	76.32	61.71	61.71	Sulfide dehydrogenase subunit alpha
CAETHG_2173	42.37	13.98	12.26	ORF
CAETHG_3376	61.45	32.12	32.12	Probable signal peptidase I-2
CAETHG_0592	35.87	18.39	18.39	Uncharacterized protein YisK
CAETHG_0448	44.75	16.02	16.02	Uncharacterized protein YgfK
CAETHG_0864	89.66	73.95	73.95	Alpha/beta hydrolase fold-3
CAETHG_3272	67.27	26.36	19.09	Probable histidinol-phosphatase
CAETHG_1925	87.95	59.04	59.04	Translation initiation factor IF-1
CAETHG_1059	60.66	47.21	34.43	Protein IolS
CAETHG_0905	83.71	61.24	59.79	P-protein
CAETHG_2228	85.96	50.85	50.85	L-arabinose isomerase 2
CAETHG_0446	58.57	30	30	Uncharacterized protein YgeY
CAETHG_0278	69.59	66.89	66.89	Probable M18 family aminopeptidase 1
CAETHG_0974	82.82	29.49	27.44	Iron-sulfur flavoprotein AF_1436
CAETHG_2788	49.22	21.61	21.61	ATP-dependent helicase/deoxyribonuclease subunit B
CAETHG_2062	38.74	11.46	11.46	Aspartate ammonia-lyase
CAETHG_0613	30.06	7.514	7.514	Thiosulfate reductase
CAETHG_2774	67.16	67.16	53.73	ORF
CAETHG_1764	45.94	6.443	6.443	Putative tRNA (cytidine(34)-2'-O)-methyltransferase
CAETHG_2066	76.06	65.43	65.43	Probable M18 family aminopeptidase 2
CAETHG_2402	46.33	5.405	5.405	Probable methyl-accepting chemotaxis protein BT9727_0469
CAETHG_0034	59.45	3.782	1.681	ORF
CAETHG_1074	58.62	37.24	31.38	Peptidase S51
CAETHG_4018	46.32	3.467	3.467	ORF
CAETHG_3232	51.06	5.026	2.381	Electron transport complex protein RnfB
CAETHG_2812	61.1	43.07	38.4	Maf-like protein CKL_0864
CAETHG_2369	64.33	39.18	38.21	Uncharacterized protein YdcI
CAETHG_1958	79.69	45.09	42.63	50S ribosomal protein L1
CAETHG_1935	42.16	26.49	16.76	50S ribosomal protein L5
CAETHG_1409	57.25	2.242	2.242	Putative NADH dehydrogenase/NAD(P)H nitroreductase AF_2267
CAETHG_0491	65.77	19.13	19.13	Serine/threonine exchanger SteT
CAETHG_1689	39.13	22.61	19.57	Aspartokinase
CAETHG_0720	78.64	45.77	44.37	Transcription elongation factor GreA
CAETHG_0573	37.59	6.383	6.383	Cyclic pyranopterin monophosphate synthase accessory protein
CAETHG_2393	37.81	15.42	12.44	ORF
CAETHG_2662	47.15	6.736	6.736	ORF
CAETHG_1314	19.35	5.655	5.655	ORF
CAETHG_2761	19.83	4.749	4.749	Argininosuccinate synthase
CAETHG_2507	89.47	74.64	67.46	UPF0194 membrane protein CKO_02332
CAETHG_1125	71.52	8.05	4.025	Porphyrin biosynthesis protein HemD
CAETHG_3028	79.85	63.22	63.22	UDP-N-acetylglucosamine--N-acetylmuramyl-(pentapeptide) pyrophosphoryl-undecaprenol N-acetylglucosamine transferase
CAETHG_1970	45.45	31.17	31.17	Uncharacterized PIN and TRAM-domain containing protein YacL
CAETHG_3264	63.09	26.17	26.17	Imidazole glycerol phosphate synthase subunit HisF
CAETHG_2802	59.34	34.43	34.43	Putative sensory transducer protein YfmS
CAETHG_3263	70.39	19.41	16.45	Histidinol-phosphate aminotransferase
CAETHG_3106	48.7	4.545	4.545	Probable methyl-accepting chemotaxis protein BT9727_0469
CAETHG_3363	49.4	9.226	2.976	Acyl carrier protein
CAETHG_2439	50.66	23.58	23.58	6-phosphofructokinase
CAETHG_2270	89.14	85.68	85.19	ORF
CAETHG_1430	36.8	8	8	Carboxymuconolactone decarboxylase
CAETHG_0154	38.46	12	12	Dimethylamine corrinoid protein
CAETHG_0686	84.49	72.28	67	Low specificity L-threonine aldolase
CAETHG_1477	76.67	59.05	55.24	Dihydroorotate dehydrogenase B (NAD(+)), catalytic subunit
CAETHG_3521	75.15	54.14	51.48	ORF
CAETHG_2229	25.11	8.811	8.811	L-ribulose-5-phosphate 4-epimerase
CAETHG_1110	7.111	5.333	5.333	Cob(I)yrinic acid a,c-diamide adenosyltransferase
CAETHG_2562	48.74	9.119	9.119	ORF
CAETHG_3668	74.4	60.63	54.11	DGC
CAETHG_3052	41.26	10.49	6.294	Flagellar protein FliS
CAETHG_3266	40.12	3.699	3.699	Phosphoribosyl-ATP pyrophosphatase
CAETHG_0629	36.59	5.488	5.488	Antibiotic biosynthesis monooxygenase
CAETHG_1887	90.71	62.5	62.5	Phosphoglucosamine mutase
CAETHG_3669	39.88	3.474	3.474	DGC
CAETHG_0339	47.87	12.5	12.5	Biotin synthase
CAETHG_0217	41.68	12.63	11.02	S-adenosylmethionine decarboxylase proenzyme
CAETHG_0871	19.21	10.73	6.78	3-dehydroquinate dehydratase
CAETHG_1939	55.14	43.46	40.89	50S ribosomal protein L29
CAETHG_2211	29.87	14.29	14.29	D-3-phosphoglycerate dehydrogenase
CAETHG_3103	54.76	7.619	7.619	ORF
CAETHG_1885	40.46	27.17	27.17	Glutamine--fructose-6-phosphate aminotransferase [isomerizing]
CAETHG_3122	55	6.667	6.667	Flagellar basal body-associated protein FliL
CAETHG_2377	70.62	55.67	43.3	Leucine--tRNA ligase
CAETHG_3214	47.44	11.46	11.46	ADP-ribose pyrophosphatase
CAETHG_1176	57.85	10.1	8.494	D-3-phosphoglycerate dehydrogenase
CAETHG_1458	64.65	34.74	34.74	Domain of unknown function DUF1858
CAETHG_1118	79.49	66.95	66.95	Probable cobalt-precorrin-6Y C(15)-methyltransferase [decarboxylating]
CAETHG_0949	50.45	21.54	15.21	Thioredoxin-like fold
CAETHG_2534	52.46	37.7	37.7	ORF
CAETHG_1220	61.29	17.74	17.74	Lipoyl synthase
CAETHG_2717	92.09	70.62	69.49	Chaperone protein ClpB
CAETHG_2791	38.61	8.416	8.416	Molybdopterin molybdenumtransferase
CAETHG_2006	19.74	3.125	3.125	Ribose-phosphate pyrophosphokinase
CAETHG_1277	61.36	47.22	47.22	Preprotein translocase YajC
CAETHG_1685	45.74	22.48	22.48	Peptide chain release factor 3
CAETHG_3611	49.4	17.07	15.27	L-threonine dehydratase catabolic TdcB
CAETHG_0484	40.89	8	8	Putative cyclase
CAETHG_3002	60.25	28.57	28.57	3-isopropylmalate dehydrogenase
CAETHG_2954	41.8	13.76	13.76	Phosphoribosylamine--glycine ligase
CAETHG_0833	87.42	64.78	64.78	Cysteine desulfurase
CAETHG_2212	48.78	35.77	31.44	Uncharacterised conserved protein UCP033563
CAETHG_3000	29.61	12.29	12.29	3-isopropylmalate dehydratase large subunit
CAETHG_2239	35.58	11.54	11.54	NAD-dependent protein deacetylase
CAETHG_2689	71.21	18.94	12.12	Malate dehydrogenase
CAETHG_2663	35.03	4.491	4.491	ORF
CAETHG_0444	44.12	17.65	17.65	D-hydantoinase
CAETHG_2970	18.4	9.6	9.6	ORF
CAETHG_2953	54.31	38.07	38.07	Bifunctional purine biosynthesis protein PurH
CAETHG_3097	37.82	22.44	22.44	ORF
CAETHG_2440	24.3	6.375	6.375	Pyruvate kinase
CAETHG_1688	47.65	3.704	3.704	Diaminopimelate decarboxylase
CAETHG_1566	83.52	67.03	67.03	Pyridoxamine 5'-phosphate oxidase-like, FMN-binding domain
CAETHG_1622	74.1	56.33	54.22	UspA
CAETHG_1629	49.43	6.226	6.226	Uncharacterized protein MJ0870
CAETHG_3429	39.69	5.852	5.852	Signal transduction response regulator, receiver domain
CAETHG_2068	44.58	5.172	3.695	Cupin 2, conserved barrel
CAETHG_2946	50.62	25.47	25.47	ORF
CAETHG_3270	52.46	8.986	8.986	ORF
CAETHG_2833	29.52	6.667	6.667	Uncharacterized protein YqeK
CAETHG_2125	77.13	49.49	45.73	DNA polymerase III subunit beta
CAETHG_1702	51.83	10.32	7.957	Probable NAD-dependent malic enzyme 4
CAETHG_1975	47.35	4.828	4.167	Putative ATP:guanido phosphotransferase CKL_0194
CAETHG_0286	25.19	7.252	4.58	Probable 5-formyltetrahydrofolate cyclo-ligase
CAETHG_1811	63.76	34.6	32.7	CGCAxxGCC motif
CAETHG_0840	76.79	32.14	32.14	Probable fatty acid methyltransferase
CAETHG_2007	50.84	34.87	28.15	Bifunctional protein GlmU
CAETHG_1863	44.41	24.28	24.28	Coenzyme A biosynthesis bifunctional protein CoaBC
CAETHG_1948	59.05	19.05	19.05	30S ribosomal protein S10
CAETHG_1065	49.35	17.46	17.46	D-3-phosphoglycerate dehydrogenase
CAETHG_2030	63.78	23.24	18.38	ORF
CAETHG_3213	52.66	16.29	15.37	ORF
CAETHG_2039	48.31	15.2	15.2	Uncharacterized protein Cgl2355/cg2587
CAETHG_3653	42.09	8.757	7.345	Probable oxidoreductase YyaE
CAETHG_2616	34.31	34.31	34.31	dTDP-glucose 4,6-dehydratase
CAETHG_1592	60.58	36.54	32.69	Protein HypA
CAETHG_2498	49.34	4.934	3.348	4-hydroxy-tetrahydrodipicolinate synthase
CAETHG_2044	54.38	29.93	25.55	Biotin carboxyl carrier protein of acetyl-CoA carboxylase
CAETHG_2255	57.68	15.77	15.77	Probable endopeptidase YdhO
CAETHG_1320	65.77	8.846	8.846	Phosphoglucomutase
CAETHG_0004	40.22	7.919	7.919	Glycerate dehydrogenase
CAETHG_1914	41.14	1.652	1.652	50S ribosomal protein L13
CAETHG_3212	57.25	26.81	26.81	Stage 0 sporulation protein A homolog
CAETHG_3040	40.44	6.011	6.011	Chemotaxis protein CheY
CAETHG_2693	45.52	6.295	4.116	Putative efflux system component YhbJ
CAETHG_2048	71.93	6.557	2.459	Malonyl CoA-acyl carrier protein transacylase
CAETHG_2994	80.15	63.07	63.07	Formylmethanofuran dehydrogenase, subunit E domain
CAETHG_1932	82.58	53.03	47.73	50S ribosomal protein L6
CAETHG_1933	55.87	24.7	24.7	30S ribosomal protein S8
CAETHG_0891	38.79	21.71	21.71	Putative amino-acid ABC transporter-binding protein PatH
CAETHG_2263	35.53	12.5	12.5	2-C-methyl-D-erythritol 2,4-cyclodiphosphate synthase
CAETHG_2105	41.67	7.407	7.407	30S ribosomal protein S6
CAETHG_1295	36.7	5.963	5.963	Anti-sigma F factor antagonist
CAETHG_0630	69.09	27.07	27.07	2,6-dihydropseudooxynicotine hydrolase
CAETHG_3997	41.05	23.68	23.68	Cupin 2, conserved barrel
CAETHG_3005	49.39	20.55	20.55	Carbon monoxide dehydrogenase
CAETHG_0025	70.52	21.39	12.72	High molecular weight rubredoxin
CAETHG_1960	49.3	8.217	6.667	Transcription termination/antitermination protein NusG
CAETHG_2730	36.13	5.78	5.78	GTP cyclohydrolase 1
CAETHG_2027	96.12	78.51	78.51	UDP-N-acetylglucosamine 1-carboxyvinyltransferase
CAETHG_2768	66.67	48.25	48.25	Probable xanthine dehydrogenase subunit A
CAETHG_1294	58.24	34.62	34.62	Anti-sigma F factor
CAETHG_1809	37.12	19.32	19.32	Purine-binding protein BAB2_0673
CAETHG_0095	17.27	10.79	10.79	Putative ABC transporter anion-binding protein HVO_1888
CAETHG_2398	50.64	9.442	9.442	Probable 2-keto-3-deoxy-galactonate aldolase YagE
CAETHG_0141	19.3	5.263	5.263	Uroporphyrinogen decarboxylase (URO-D)
CAETHG_2907	87.94	70.1	69.85	ORF
CAETHG_3036	70.56	64.92	62.9	Chemotaxis response regulator protein-glutamate methylesterase
CAETHG_1578	53.94	28.63	28.63	NADP-reducing hydrogenase subunit HndA
CAETHG_3228	56.02	26.91	25.6	Electron transport complex protein RnfD
CAETHG_1123	52.93	16.67	16.67	Cobyrinic acid A,C-diamide synthase
CAETHG_0130	50.8	12.14	10.54	Urea amidolyase
CAETHG_2789	30.28	6.528	5.077	Formate dehydrogenase H
CAETHG_1076	35.25	3.694	3.131	ORF
CAETHG_0151	34.97	3.067	3.067	Uroporphyrinogen decarboxylase (URO-D)
CAETHG_0938	74.76	40.12	40.12	Uncharacterized protein YgeA
CAETHG_1620	71.28	71.28	71.28	Carbon monoxide dehydrogenase 1
CAETHG_3684	97.67	87.99	86.92	Aminopeptidase 2
CAETHG_2226	53.15	20.27	16.16	Putative peptidyl-prolyl cis-trans isomerase Cbf2
CAETHG_1479	38.06	12.8	12.8	Orotidine 5'-phosphate decarboxylase
CAETHG_2257	39.43	11.79	11.79	Transition state regulatory protein AbrB
CAETHG_1234	46.78	10.53	10.53	Sporulation protein YtfJ
CAETHG_3909	14.6	10.91	9.899	Nitroreductase-like
CAETHG_1270	46.79	11.4	5.938	Adenine phosphoribosyltransferase
CAETHG_2433	26.1	6.745	6.745	UDP-N-acetylenolpyruvoylglucosamine reductase
CAETHG_3099	41.64	5.574	5.574	Homoserine dehydrogenase
CAETHG_3166	66.34	31.71	31.71	Diaminopimelate epimerase
CAETHG_1031	55.64	14.01	14.01	ORF
CAETHG_0456	41.9	10.71	10.71	Xanthine dehydrogenase/oxidase
CAETHG_0160	54.91	10.69	9.249	Purine nucleoside phosphorylase 1
CAETHG_1630	61.54	29.37	29.37	UPF0051 protein AF_2365
CAETHG_3160	57.42	20	20	5'-methylthioadenosine/S-adenosylhomocysteine nucleosidase
CAETHG_3200	50	10	10	Alkaline shock protein 23
CAETHG_0812	27.01	6.897	3.448	Hydroxylamine reductase 2
CAETHG_1121	62.5	57.01	51.52	Cobalt-precorrin-8X methylmutase
CAETHG_1064	70.59	56.78	45.27	Putative sensory transducer protein YfmS
CAETHG_2677	57.18	15.72	15.72	Uncharacterized ABC transporter substrate-binding lipoprotein YvrC
CAETHG_2850	42.54	8.458	8.458	Uroporphyrinogen decarboxylase (URO-D)
CAETHG_2845	41.48	16.3	8.148	Uroporphyrinogen decarboxylase (URO-D)
CAETHG_2256	42.96	8.174	7.13	Protein P54
CAETHG_2034	79.43	53.83	50.24	ORF
CAETHG_0275	75	35.94	35.94	ORF
CAETHG_3502	51.83	13.69	11.25	Cupin 2, conserved barrel
CAETHG_3294	49.49	14.47	8.122	Iron sulfur cluster assembly protein 1
CAETHG_2224	50.98	5.882	5.882	Uncharacterized aminotransferase MJ0959
CAETHG_0255	36.43	5.426	5.426	ORF
CAETHG_3413	68.71	59.86	59.86	Stage V sporulation protein S
CAETHG_1929	67.69	25.38	20	50S ribosomal protein L30
CAETHG_3801	44.74	5.789	5.789	ORF
CAETHG_2358	86.97	70.77	63.03	S-adenosylmethionine synthase
CAETHG_0241	87.27	57.27	48.18	N-acetyl-gamma-glutamyl-phosphate reductase
CAETHG_2191	58.61	38.1	38.1	ORF
CAETHG_3037	29.97	6.51	1.459	Chemotaxis protein methyltransferase
CAETHG_2692	75	28.7	26.39	ORF
CAETHG_3303	71.86	53.27	53.27	UPF0342 protein CTC_01059
CAETHG_0039	60.47	40.7	32.56	Uso1/p115-like vesicle tethering protein, C-terminal
CAETHG_1114	83.21	18.98	18.98	Cobalt-precorrin-3B C(17)-methyltransferase
CAETHG_0816	41.6	10.53	8.772	High-affinity gluconate transporter
CAETHG_0370	38.02	8.264	8.264	Hydrogenase expression/formation protein HypD
CAETHG_2200	76.79	65.05	63.78	Nucleoid-associated protein CLD_0785
CAETHG_4003	88.26	83.02	83.02	Autoinducer 2-binding protein LsrB
CAETHG_0478	69.85	49.23	45.1	Uncharacterized protein YbhJ
CAETHG_2558	57.09	44.73	38.91	Amidase enhancer
CAETHG_3189	73.88	50.75	50.75	Uncharacterized peptidase YqhT
CAETHG_3850	50.42	24.37	24.37	Ferredoxin-dependent glutamate synthase 1
CAETHG_0351	39.35	19.68	19.68	Peptidyl-prolyl cis-trans isomerase-like 3
CAETHG_3863	35.23	13.64	13.64	Putative sensory transducer protein YfmS
CAETHG_1357	57.89	35.34	31.58	2,3,4,5-tetrahydropyridine-2,6-dicarboxylate N-acetyltransferase
CAETHG_1604	41.4	12.09	12.09	ORF
CAETHG_3041	81.05	81.05	81.05	CheW-like protein
CAETHG_0820	67.19	20.31	20.31	Spermidine synthase 1
CAETHG_1457	76.58	12.03	12.03	Domain of unknown function DUF1858
CAETHG_3802	44.62	10.76	10.76	PemK-like protein
CAETHG_0373	48.96	7.761	2.687	Nitrogenase/oxidoreductase, component 1
CAETHG_2336	89.81	87.58	87.58	Ribose-5-phosphate isomerase B
CAETHG_1591	82.59	79.18	79.18	Carbon starvation protein A homolog
CAETHG_0920	83.74	61.79	61.79	Putative sensory transducer protein YfmS
CAETHG_1606	69.9	30.58	30.58	Na(+)-translocating NADH-quinone reductase subunit F
CAETHG_0574	91.95	14.37	14.37	Gephyrin
CAETHG_3290	39.89	11.7	11.7	Propanediol utilization protein PduA
CAETHG_2796	68.35	11.39	11.39	NADH-quinone oxidoreductase subunit G 2
CAETHG_3639	46.2	9.031	8.377	Putative NADH dehydrogenase/NAD(P)H nitroreductase AF_2267
CAETHG_0350	79.01	34.57	34.57	Probable methyl-accepting chemotaxis protein BT9727_0469
CAETHG_0057	64.02	23.83	23.83	Chaperone protein HtpG
CAETHG_2008	42.67	6.667	5	Putative septation protein SpoVG
CAETHG_2729	91.82	78.18	76.67	Dihydropteroate synthase
CAETHG_2421	55.14	5.676	5.135	Putative transketolase C-terminal section
CAETHG_2349	82.35	50.42	40.34	ATP synthase subunit beta
CAETHG_1250	19.59	10.31	10.31	Probable phosphatase NT01CX_1282
CAETHG_0556	43.24	23.42	23.42	Heavy metal-associated domain, HMA
CAETHG_1907	63.07	3.32	3.32	Methylaspartate mutase S chain
CAETHG_2797	90.91	90.91	90.91	Putative electron transport protein YsaA
CAETHG_1632	43.35	5.579	3.433	Molybdenum cofactor sulfurase, C-terminal
CAETHG_1779	87.16	60.55	55.05	Reverse rubrerythrin-1
CAETHG_3053	65.91	29.55	29.55	Flagellar hook-associated protein 2
CAETHG_1473	56	28.8	28.8	Trigger factor
CAETHG_0749	66.78	24.16	22.15	ORF
CAETHG_1631	57.04	8.451	8.451	Uncharacterized ABC transporter ATP-binding protein MJ0035
CAETHG_3298	45.65	17.93	5.978	UPF0297 protein CKL_1325
CAETHG_2047	70.08	59.08	59.08	Malonyl CoA-acyl carrier protein transacylase
CAETHG_3411	89.47	47.37	47.37	Protein RecA
CAETHG_0406	64.18	20.21	20.21	Probable acetolactate synthase large subunit
CAETHG_2420	84.89	70.89	68.44	Putative transketolase N-terminal section
CAETHG_0447	59.2	14.66	14.66	Protein SsnA
CAETHG_1079	30.66	5.896	5.896	NADH oxidase
CAETHG_0103	76.54	72.84	72.84	ThiamineS/Molybdopterin converting factor subunit 1
CAETHG_2503	41.48	11.79	11.79	Protein PrkA
CAETHG_1117	27.17	4.009	4.009	Cobalt-precorrin-2 C(20)-methyltransferase
CAETHG_1264	61.08	61.08	61.08	Aspartate--tRNA ligase
CAETHG_3998	55.25	12.04	12.04	Autoinducer 2 kinase LsrK
CAETHG_2478	54.61	12.63	8.532	Probable NAD-dependent malic enzyme 4
CAETHG_0907	33.62	10.21	7.872	3-phosphoshikimate 1-carboxyvinyltransferase
CAETHG_0572	55.38	15.94	15.94	Molybdenum cofactor sulfurase, C-terminal
CAETHG_1147	81.13	24.53	24.53	D-specific alpha-keto acid dehydrogenase
CAETHG_1892	60.9	23.31	23.31	Thioredoxin reductase
CAETHG_2045	49.48	10.42	10.42	3-oxoacyl-[acyl-carrier-protein] synthase 2
CAETHG_2235	56.48	7.716	7.716	D-ribose-binding periplasmic protein
CAETHG_2762	54.89	7.065	4.891	Argininosuccinate lyase
CAETHG_2585	74.45	59.85	59.85	ORF
CAETHG_1605	64.29	15.71	15.71	RNA-binding protein, predicted
CAETHG_2834	82.49	57.6	53.92	RutC family protein PYRAB12510
CAETHG_2033	72.63	34.74	34.74	Asparagine--tRNA ligase
CAETHG_2799	38.89	23.81	23.81	Putative electron transport protein YsaA
CAETHG_2822	45.38	6.827	6.827	Methylglyoxal synthase
CAETHG_1223	80.65	57.04	57.04	Cold shock protein CspA
CAETHG_3418	69.12	29.12	24.21	Phosphocarrier protein HPr
CAETHG_0543	38.43	3.057	3.057	Iron-sulfur flavoprotein MJ1083
CAETHG_1267	36.34	4.39	4.39	Uncharacterized protein YcbL
CAETHG_0213	58.07	22.38	19.55	2-aminoadipate transaminase
CAETHG_2784	70.4	40.8	40.8	Protein QmcA
CAETHG_1968	43.02	7.558	7.558	Cysteine--tRNA ligase
CAETHG_2949	48.45	36.82	36.82	Phosphoribosylaminoimidazole-succinocarboxamide synthase
CAETHG_2346	42.21	22.73	22.73	ATP synthase subunit delta
CAETHG_1900	89.44	73.91	73.91	Citrate lyase subunit beta
CAETHG_2988	38.7	5.649	5.649	Formate dehydrogenase H
CAETHG_2899	98.1	60.95	60.95	Uncharacterized protein YqeY
CAETHG_1621	35.35	7.907	7.907	Carbon monoxide dehydrogenase 1
CAETHG_2341	40.4	2.289	2.289	Putative UDP-N-acetylglucosamine 2-epimerase
CAETHG_1351	71.83	71.83	71.83	4-hydroxy-tetrahydrodipicolinate reductase
CAETHG_0145	49.48	38.41	38.41	5-methyltetrahydrofolate:corrinoid/iron-sulfur protein co-methyltransferase
CAETHG_1116	73.01	52.15	44.79	Probable cobalt-precorrin-4 C(11)-methyltransferase
CAETHG_0104	76.21	50.69	40.34	Probable molybdopterin-synthase adenylyltransferase
CAETHG_0315	44.59	13.51	13.51	Putative ABC transporter substrate-binding lipoprotein YvgL
CAETHG_1903	58.53	12.44	12.44	Putative fumarate hydratase subunit alpha
CAETHG_1587	35.97	9.353	9.353	UPF0045 protein CPE1503
CAETHG_0910	72.58	62.1	62.1	Phospho-2-dehydro-3-deoxyheptonate aldolase
CAETHG_3388	45	9.444	9.444	Ribosome-recycling factor
CAETHG_2555	32.38	7.619	7.619	N-acetylmuramoyl-L-alanine amidase LytC
CAETHG_3229	62.59	19.93	19.93	ORF
CAETHG_1615	72.11	46.26	42.18	ORF
CAETHG_2010	60.23	30.68	30.68	UDP-N-acetylmuramate--L-alanine ligase
CAETHG_0123	44.68	23.4	9.574	Dihydroxy-acid dehydratase
CAETHG_1122	69.77	62.79	62.79	Nicotinate-nucleotide--dimethylbenzimidazole phosphoribosyltransferase
CAETHG_0983	47.06	16.58	16.58	NADH oxidase
CAETHG_3312	34.8	12.25	12.25	Cell division protein FtsZ
CAETHG_1126	60.46	50.33	46.41	Porphobilinogen deaminase
CAETHG_0760	81.4	45.35	45.35	Pleiotropic regulatory protein
CAETHG_3032	44.81	18.08	14.62	Putative branched-chain-amino-acid aminotransferase
CAETHG_1573	67.42	48.48	48.48	10 kDa chaperonin
CAETHG_1138	29.59	14.29	14.29	Membrane lipoprotein TpN32
CAETHG_1959	33.13	9.465	9.465	50S ribosomal protein L11
CAETHG_1453	77.78	61.11	61.11	Transcription elongation factor GreA
CAETHG_1586	52.54	52.54	52.54	Probable 3-hydroxybutyryl-CoA dehydrogenase
CAETHG_2995	58.96	43.93	43.35	Uncharacterized protein YpuA
CAETHG_0482	51.02	12.71	12.71	NADH oxidase
CAETHG_0233	73.57	61.26	61.26	Imidazolonepropionase
CAETHG_3249	63.14	37.65	35.29	D-3-phosphoglycerate dehydrogenase
CAETHG_1146	36.35	1.826	0.5217	Nitroreductase-like
CAETHG_0238	92.53	67.24	58.05	Acetylornithine aminotransferase
CAETHG_3190	65.41	48.11	43.24	Elongation factor P
#N/A	30.79	2.864	2.864	Uncharacterised conserved protein UCP033563
CAETHG_2345	72.86	34.92	34.92	ATP synthase subunit b
CAETHG_4017	51.7	40.38	40.38	Chemotaxis protein CheY
CAETHG_2098	68.93	27.91	25.24	50S ribosomal protein L9
CAETHG_0155	84.6	77.4	75.28	Uroporphyrinogen decarboxylase (URO-D)
CAETHG_1893	61.03	35.4	34.48	Thioredoxin
CAETHG_3034	57.22	4.278	4.278	Chemotaxis protein CheW
CAETHG_1996	34.74	3.722	3.722	DNA-binding protein HU
CAETHG_1481	74.21	58.95	58.95	Aspartate carbamoyltransferase
CAETHG_0412	57.17	2.677	2.677	S-ribosylhomocysteine lyase
CAETHG_0887	54.17	31.67	31.67	Uncharacterized protein MJ0746
CAETHG_3468	64.47	44.74	44.74	Pyridoxamine 5&apos
CAETHG_1318	52.08	21.27	19.32	UTP--glucose-1-phosphate uridylyltransferase
CAETHG_1432	41.14	15.8	15.8	Putative NADH dehydrogenase/NAD(P)H nitroreductase AF_2267
CAETHG_1983	14.47	10.66	7.614	Transcription elongation factor GreA
CAETHG_3293	43.67	24.05	24.05	Cysteine desulfurase
CAETHG_1926	67.86	8.333	8.333	Adenylate kinase
CAETHG_0122	38.1	20.63	20.63	Ketol-acid reductoisomerase
CAETHG_1902	54.07	7.778	7.778	Fumarate hydratase class I, anaerobic
CAETHG_0449	72.87	68.62	63.83	Uncharacterized protein YgeW
CAETHG_3921	25.48	2.74	2.74	Cytidine deaminase
CAETHG_2897	84.19	65.58	62.33	Uncharacterized HIT-like protein aq_141
CAETHG_1211	72.73	58.04	58.04	Cystine-binding periplasmic protein
CAETHG_2794	24.86	15.82	8.475	NADP-reducing hydrogenase subunit HndA
CAETHG_0257	81.43	76.84	75.74	Arginine--tRNA ligase
CAETHG_0258	70.87	41.12	41.12	UDP-glucose 4-epimerase
CAETHG_1810	74.49	53.08	48.39	Probable transaldolase
CAETHG_2275	71.28	40.77	39.57	Methionine--tRNA ligase
CAETHG_1472	65.76	46.97	46.97	ATP-dependent Clp protease proteolytic subunit
CAETHG_2347	50.32	21.52	18.99	ATP synthase subunit alpha
CAETHG_1336	68.18	51.3	51.3	Hydroxyacid oxidase 1
CAETHG_0817	71.37	48.79	46.37	Glucarate dehydratase
CAETHG_1956	91.89	27.03	27.03	50S ribosomal protein L7/L12
CAETHG_2537	15.86	2.643	2.643	Putative aspartate aminotransferase YhdR
CAETHG_3932	61.97	24.79	24.79	Xylose isomerase
CAETHG_1757	66.75	22.25	22.25	2,3-bisphosphoglycerate-independent phosphoglycerate mutase
CAETHG_2521	42.77	13.23	13.23	Glutamate-1-semialdehyde 2,1-aminomutase
CAETHG_1352	53.33	38.67	34.67	4-hydroxy-tetrahydrodipicolinate synthase
CAETHG_1607	64.49	13.07	13.07	Glycine cleavage system H protein
CAETHG_1307	18.7	6.484	6.484	Uncharacterized oxidoreductase YrbE
CAETHG_2367	81.31	67.29	67.29	NADP-specific glutamate dehydrogenase
CAETHG_1130	46.49	42.98	37.72	Cobyric acid synthase
CAETHG_2337	72.39	52.99	52.99	Uracil phosphoribosyltransferase
CAETHG_1617	41.43	22.86	22.86	Methenyltetrahydrofolate cyclohydrolase
CAETHG_0143	34.33	5.069	3.917	1-phosphofructokinase
CAETHG_3022	86.6	28.76	28.76	Ornithine carbamoyltransferase
CAETHG_3386	65.49	38.73	38.73	Elongation factor Ts
CAETHG_2922	33.61	7.377	7.377	Cysteine synthase
CAETHG_1623	71.82	46.96	46.96	Dinitrogenase iron-molybdenum cofactor biosynthesis
CAETHG_3922	52.08	19.58	19.58	Deoxyribose-phosphate aldolase
CAETHG_1899	39.36	12.22	12.22	Citrate lyase alpha chain
CAETHG_1776	79.89	36.96	36.96	Cysteine synthase
CAETHG_2260	49.46	32.85	28.16	Probable membrane-associated 30 kDa protein, chloroplastic
CAETHG_2137	60.76	27.03	27.03	Serine--tRNA ligase
CAETHG_0908	59.24	2.13	2.13	3-dehydroquinate synthase
CAETHG_2757	73.62	10.05	10.05	Cystine-binding periplasmic protein
CAETHG_2293	76.32	62.28	47.37	HTH-type transcriptional regulator RegA
CAETHG_0591	43.55	24.19	24.19	Ornithine carbamoyltransferase
CAETHG_0410	48.64	19.91	17.65	Probable NADH-dependent butanol dehydrogenase 1
CAETHG_2752	38.46	12.54	12.54	Aconitate hydratase, mitochondrial
CAETHG_0232	95.65	95.65	95.65	Histidine ammonia-lyase
CAETHG_0823	89.55	89.55	89.55	Probable 2-keto-3-deoxy-galactonate aldolase YagE
CAETHG_0142	51.63	13.32	13.32	PTS system fructose-specific EIIABC component
CAETHG_3890	76.5	67.23	66.72	Glyoxal reductase
CAETHG_3420	93.97	37.07	37.07	Adenylosuccinate lyase
CAETHG_0036	58.7	36.96	36.96	Uncharacterized aminotransferase SSO0104
CAETHG_3227	53.2	36	36	Electron transport complex protein rnfC
CAETHG_1570	69.7	58.68	57.3	GMP synthase [glutamine-hydrolyzing]
CAETHG_2059	62.72	35.96	35.96	Adenylosuccinate synthetase
CAETHG_2000	27.3	6.667	6.667	Foldase protein PrsA
CAETHG_2891	64.32	20.89	16.43	Chaperone protein DnaK
CAETHG_2698	92.96	76.76	76.76	Gamma-glutamyl phosphate reductase
CAETHG_2721	80.85	69	69	Phosphoenolpyruvate carboxykinase [ATP] 1
CAETHG_3813	51.69	1.408	1.408	Rubrerythrin
CAETHG_1571	91.36	37.04	37.04	Inosine-5'-monophosphate dehydrogenase
CAETHG_2798	56.94	18.86	18.86	Iron hydrogenase 1
CAETHG_2382	25	13.79	13.79	Fructose-bisphosphate aldolase
CAETHG_1217	46.62	10.81	10.81	Threonine synthase-like 1
CAETHG_3852	44.88	9.449	9.449	Putative dipeptidase YtjP
CAETHG_1616	29.01	12.63	12.63	Bifunctional protein FolD
CAETHG_1758	59.12	45.86	45.86	Triosephosphate isomerase
CAETHG_0821	36.9	15.86	13.79	Uncharacterized protein YeaE
CAETHG_3065	52.5	11.25	11.25	Flagellin
CAETHG_2795	41.67	36.11	25	NADP-reducing hydrogenase subunit HndC
CAETHG_1580	72.67	51.95	50.15	Sulfide dehydrogenase subunit alpha
CAETHG_3417	65.08	19.58	19.58	Aspartate aminotransferase
CAETHG_3424	35.96	8.121	6.729	Glyceraldehyde-3-phosphate dehydrogenase
CAETHG_1963	34.11	3.679	3.679	Elongation factor Tu
CAETHG_3241	57.89	50.38	50.38	Serine hydroxymethyltransferase
CAETHG_2210	55.94	20.58	11.3	Uncharacterized aminotransferase MJ0959
CAETHG_0234	48.57	31.43	31.43	Probable urocanate hydratase
CAETHG_0759	39.32	2.906	2.906	Uncharacterized protein MJ1066
CAETHG_1353	30.09	2.315	2.315	Aspartate-semialdehyde dehydrogenase
CAETHG_0555	77.04	39.85	36.74	NADPH-dependent butanol dehydrogenase
CAETHG_1614	27.05	1.423	1.423	Bifunctional homocysteine S-methyltransferase/5,10-methylenetetrahydrofolate reductase
CAETHG_1385	37.81	15.23	15.23	ABC transporter periplasmic-binding protein YtfQ
CAETHG_0291	40.87	19.57	19.57	Flavo-diiron protein FprA1
CAETHG_0385	68.91	68.63	68.63	(R,R)-butanediol dehydrogenase
CAETHG_1904	39.13	24.46	18.21	Methylaspartate ammonia-lyase
CAETHG_0215	22.79	6.047	6.047	Aspartate aminotransferase
CAETHG_2754	79.67	75.61	75.61	O-acetylhomoserine (thiol)-lyase
CAETHG_1609	72.37	53.51	53.51	5-methyltetrahydrofolate:corrinoid/iron-sulfur protein co-methyltransferase
CAETHG_1905	34.31	8.504	8.504	Methylaspartate mutase E chain
CAETHG_0319	33.23	5.591	5.591	Bifunctional purine biosynthesis protein PURH
CAETHG_3358	40.29	8.678	7.645	Phosphate acetyltransferase
CAETHG_1611	67.65	30.88	14.71	Corrinoid/iron-sulfur protein small subunit
CAETHG_2790	65.88	29.41	29.41	Formate dehydrogenase H
CAETHG_3359	73.66	58.82	55.75	Acetate kinase
CAETHG_3924	83.16	32.45	25.35	Phosphopentomutase
CAETHG_2909	64.27	29.26	29.26	Pyruvate, phosphate dikinase
CAETHG_2441	66.27	39.25	37.28	Pyruvate kinase
CAETHG_1760	58.12	28.93	28.93	Glyceraldehyde-3-phosphate dehydrogenase 1
CAETHG_1759	58.56	20.99	20.99	Phosphoglycerate kinase
CAETHG_2588	62.16	40.81	40.81	N-acetylmuramoyl-L-alanine amidase LytC
CAETHG_2866	70.54	16.76	16.76	Hydroxylamine reductase
CAETHG_3954	81.4	70.76	70.76	NADPH-dependent butanol dehydrogenase
CAETHG_3029	40.51	23.58	23.58	Pyruvate-flavodoxin oxidoreductase
CAETHG_1572	97.3	81.08	81.08	60 kDa chaperonin
CAETHG_1610	66.32	11.05	11.05	Corrinoid/iron-sulfur protein large subunit
CAETHG_0092	75.96	40.95	38.28	Tungsten-containing aldehyde ferredoxin oxidoreductase
CAETHG_0102	36.91	0.9464	0.9464	Tungsten-containing aldehyde ferredoxin oxidoreductase
CAETHG_2557	34.9	2.532	2.532	N-acetylmuramoyl-L-alanine amidase LytC
CAETHG_1608	72.32	59.97	58.15	Carbon monoxide dehydrogenase/acetyl-CoA synthase subunit alpha
CAETHG_1613	77.59	64.09	62.44	Dihydrolipoyl dehydrogenase
CAETHG_1841	76.09	58.15	58.15	NADPH-dependent butanol dehydrogenase
CAETHG_1618	65.33	44.44	44.44	Formate--tetrahydrofolate ligase
CAETHG_3925	82.44	71.76	63.36	Pyrimidine-nucleoside phosphorylase

## Sheet: TABLE S5 sig proeomics
	Name	Fructose/RMG	Pval
CAETHG_0142	PTS system fructose-specific EIIABC component 2.7.1.-	19.9526	0.00162243	=
CAETHG_1758	Triosephosphate isomerase 5.3.1.1	16.9044	0.000109615
CAETHG_1294	Anti-sigma F factor 2.7.11.1	16.7494	0.0183573
CAETHG_2949	Phosphoribosylaminoimidazole-succinocarboxamide synthase 6.3.2.6	15.417	0.00101428
CAETHG_0151	Uroporphyrinogen decarboxylase (URO-D) 4.1.1.37	14.0605	0.00664654
CAETHG_1776	Cysteine synthase 2.5.1.47	11.8032	0.0478119
CAETHG_2946	ORF	11.1686	0.00766224
CAETHG_1757	2,3-bisphosphoglycerate-independent phosphoglycerate mutase 5.4.2.1	10.5682	0.00364325
CAETHG_2754	O-acetylhomoserine (thiol)-lyase 2.5.1.49	10.3753	0.00108468
CAETHG_2503	Protein PrkA	9.63829	0.0183537
CAETHG_2275	Methionine--tRNA ligase 6.1.1.10	9.54993	0.0262444
CAETHG_3411	Protein RecA	9.46237	0.000712267
CAETHG_3954	NADPH-dependent butanol dehydrogenase 1.1.1.-	9.46237	7.66372e-06
CAETHG_0257	Arginine--tRNA ligase 6.1.1.19	9.2045	0.00342384
CAETHG_1580	Sulfide dehydrogenase subunit alpha 1.18.1.2	9.2045	4.36464e-05
CAETHG_0406	Probable acetolactate synthase large subunit 2.2.1.6	9.12011	0.00531878
CAETHG_0820	Spermidine synthase 1 2.5.1.16	7.7983	0.006505
CAETHG_2210	Uncharacterized aminotransferase MJ0959 2.6.1.-	7.37904	0.000144828
CAETHG_0122	Ketol-acid reductoisomerase 1.1.1.86	7.11213	0.015094
CAETHG_3420	Adenylosuccinate lyase 4.3.2.2	7.11213	5.26124e-05
CAETHG_1572	60 kDa chaperonin	6.60694	0.0145964
CAETHG_0213	2-aminoadipate transaminase 2.6.1.39	6.48634	0.0167125
CAETHG_2033	Asparagine--tRNA ligase 6.1.1.22	6.30957	0.0176386
CAETHG_1611	Corrinoid/iron-sulfur protein small subunit	5.44503	4.97894e-07
CAETHG_0155	Uroporphyrinogen decarboxylase (URO-D) 4.1.1.37	5.01187	0.013636
CAETHG_1385	ABC transporter periplasmic-binding protein YtfQ	5.01187	0.00124964
CAETHG_3932	Xylose isomerase 5.3.1.5	5.01187	0.0291678
CAETHG_1295	Anti-sigma F factor antagonist	4.74242	0.0319035
CAETHG_0141	Uroporphyrinogen decarboxylase (URO-D) 4.1.1.37	3.66438	0.0443761
CAETHG_2790	Formate dehydrogenase H 1.1.99.33	3.66438	0.030323
CAETHG_2752	Aconitate hydratase, mitochondrial 4.2.1.3	3.37287	0.0380931
CAETHG_3924	Phosphopentomutase 5.4.2.7	3.01995	3.30548e-05
CAETHG_0350	Probable methyl-accepting chemotaxis protein BT9727_0469	2.70396	0.00267782
CAETHG_1571	Inosine-5'-monophosphate dehydrogenase 1.1.1.205	2.53513	5.60298e-06
CAETHG_1963	Elongation factor Tu	2.51189	0.000375576
CAETHG_2762	Argininosuccinate lyase 4.3.2.1	2.46604	0.0487806
CAETHG_2988	Formate dehydrogenase H 1.1.99.33	2.33346	0.00943512
CAETHG_1578	NADP-reducing hydrogenase subunit HndA 1.12.1.3	2.208	0.0036158
CAETHG_0591	Ornithine carbamoyltransferase 2.1.3.3	1.99526	0.00114266
CAETHG_2833	Uncharacterized protein YqeK 3.1.4	1.99526	0.0253762
CAETHG_2347	ATP synthase subunit alpha 3.6.3.14	1.90546	0.0477296
CAETHG_2588	N-acetylmuramoyl-L-alanine amidase LytC 3.5.1.28	1.88799	0.000887917
CAETHG_0908	3-dehydroquinate synthase 4.2.3.4	1.8197	0.0482911
CAETHG_0385	(R,R)-butanediol dehydrogenase 1.1.1.4	1.57036	0.041773
CAETHG_1760	Glyceraldehyde-3-phosphate dehydrogenase 1 1.2.1.12	1.04713	2.79818e-07
CAETHG_1608	Carbon monoxide dehydrogenase/acetyl-CoA synthase subunit alpha 2.3.1.169	1.03753	2.04849e-08
CAETHG_2382	Fructose-bisphosphate aldolase 4.1.2.13	1.03753	0.00791684
CAETHG_1610	Corrinoid/iron-sulfur protein large subunit	1.02802	0.0114014
CAETHG_3925	Pyrimidine-nucleoside phosphorylase 2.4.2.2	1.02802	2.68326e-05
CAETHG_1618	Formate--tetrahydrofolate ligase 6.3.4.3	0.963829	1.1081e-09
CAETHG_1841	NADPH-dependent butanol dehydrogenase 1.1.1.-	0.954993	0.000107048
CAETHG_0102	Tungsten-containing aldehyde ferredoxin oxidoreductase 1.2.7.5	0.946237	0.000131611
CAETHG_1616	Bifunctional protein FolD 1.5.1.5	0.824138	4.74634e-05
CAETHG_0910	Phospho-2-dehydro-3-deoxyheptonate aldolase 2.5.1.54	0.57544	0.0158423
CAETHG_2125	DNA polymerase III subunit beta 2.7.7.7	0.570164	0.0252035
CAETHG_1983	Transcription elongation factor GreA	0.524808	0.0294865
CAETHG_0036	Uncharacterized aminotransferase SSO0104 2.6.1.-	0.49204	0.00650772
CAETHG_3065	Flagellin	0.49204	0.00112505
CAETHG_0233	Imidazolonepropionase 3.5.2.7	0.487529	0.00675033
CAETHG_1064	Putative sensory transducer protein YfmS	0.474242	0.0418774
CAETHG_0319	Bifunctional purine biosynthesis protein PURH 2.1.2.3	0.398107	0.0276104
CAETHG_2897	Uncharacterized HIT-like protein aq_141	0.356451	0.00409048
CAETHG_2866	Hydroxylamine reductase 1.7.-.-	0.346737	8.13356e-06
CAETHG_3053	Flagellar hook-associated protein 2	0.296483	0.0286407
CAETHG_1899	Citrate lyase alpha chain 2.8.3.10	0.272898	0.00204925
CAETHG_2721	Phosphoenolpyruvate carboxykinase [ATP] 1 4.1.1.49	0.272898	6.11723e-06
CAETHG_2555	N-acetylmuramoyl-L-alanine amidase LytC 3.5.1.28	0.239883	0.00205953
CAETHG_1615	ORF	0.21677	0.0235245
CAETHG_1902	Fumarate hydratase class I, anaerobic 4.2.1.2	0.169044	0.00697959
CAETHG_3852	Putative dipeptidase YtjP 3.4.13.-	0.165959	0.00160893
CAETHG_1900	Citrate lyase subunit beta 4.1.3.34	0.145881	0.00787078
CAETHG_3022	Ornithine carbamoyltransferase 2.1.3.3	0.11272	6.50894e-08
CAETHG_1905	Methylaspartate mutase E chain 5.4.99.1	0.101859	4.7672e-07
CAETHG_2008	Putative septation protein SpoVG	0.0903649	0.00247184
CAETHG_1903	Putative fumarate hydratase subunit alpha 4.2.1.2	0.0895365	0.018822
CAETHG_0092	Tungsten-containing aldehyde ferredoxin oxidoreductase 1.2.7.5	0.0887156	4.95413e-11
CAETHG_0232	Histidine ammonia-lyase 4.3.1.3	0.077983	3.01917e-06
CAETHG_3249	D-3-phosphoglycerate dehydrogenase 1.1.1.95	0.0679204	1.51345e-05
CAETHG_0887	Uncharacterized protein MJ0746 1	0.0648634	2.78088e-06
CAETHG_3290	Propanediol utilization protein PduA	0.0636796	0.0456211
CAETHG_2068	Cupin 2, conserved barrel	0.0580764	0.00157563
CAETHG_1904	Methylaspartate ammonia-lyase 4.3.1.2	0.0559758	2.61899e-07
CAETHG_2585	ORF	0.0199526	0.0159604
CAETHG_3227	Electron transport complex protein rnfC	0.0183654	2.32037e-13
CAETHG_3228	Electron transport complex protein RnfD	0.0148594	0.0091708
CAETHG_3229	ORF	0.0134276	2.39232e-06

## Sheet: TABLE S6 relevaflux simulations
rxn	long reaction	Condition 1	Condition 2	Condition 3	Condition 4	Condition 5	Condition 6	Condition 7	Condition 8	Condition 9	Condition 10	Condition 11	Condition 12	Condition 13	Condition 14	Condition 15	Condition 16	Condition 17	Condition 18
R_rxn00225_c0	1 H+ + 1 ATP + 1 Acetate = 1 Acetylphosphate + 1 ADP	-18.5455	-9.70032	2.56789	-12.1763	-17.5279	5.75228	-24.2443	-23.1508	-3.8386	-1.80798	-4.4193	-3.99203	0.0325335	-3.43495	-3.98781	-3.79229	-3.79229	-0.88386
R_rxn00910_c0	1 Reducedferredoxin + 2.0 NAD + 1 5-Methyltetrahydrofolate = 1 Oxidizedferredoxin + 1 5-10-Methylenetetrahydrofolate + 2.0 NADH	-6.40042	-0.0658405	-0.0394618	-0.0821283	-5.54756	-1.43281	-8.04918	-7.67856	-4.66803	-2.26545	-4.83402	-4.71189	-0.203829	-4.55266	-4.71068	-4.65479	-4.65479	-4.9668
R_rxn00690_c0	1 ATP + 1 Tetrahydrofolate + 1 Formate = 1 10-Formyltetrahydrofolate + 1 Phosphate + 1 ADP	6.82645	0.45044	0.269973	0.561871	5.97141	1.60265	8.28007	7.95331	4.71836	2.29321	4.85918	4.75557	0.218172	4.62048	4.75455	4.70713	4.70713	4.97184
R_cpd00082_ext_b	1 D-Fructose = 1 D-Fructose	-10	-10	-10	-10	-10	-10	-10	-10	0	0	0	0	0	0	0	0	0	0
R_rxn00171_c0	1 H+ + 1 NADH + 1 Acetyl-CoA = 1 NAD + 1 CoA + 1 Acetaldehyde	0.834174	2.79657	2.04503	0	1.03491	5.36704	0	0	0	0	0	0	0	0	0	0	0	0
R_rxn01211_c0	1 H2O + 1 5-10-Methenyltetrahydrofolate = 1 10-Formyltetrahydrofolate + 1 H+	-6.59801	-0.244215	-0.146371	-0.304629	-5.74414	-1.51158	-8.15627	-7.80599	-4.69138	-2.27832	-4.84569	-4.73215	-0.210481	-4.58411	-4.73103	-4.67907	-4.67907	-4.96914
R_cpd00013_ext_b	1 NH3 = 1 NH3	-3.55649	-3.21062	-1.9243	-4.00487	-3.53826	-1.41782	-1.92746	-2.29365	-0.420163	-0.231742	-0.210082	-0.364657	-0.119734	-0.566193	-0.366183	-0.436919	-0.436919	-0.0420163
R_rxn10042_c0	4.0 H+ + 1 Phosphate + 1 ADP = 1 ATP + 3.0 H+ + 1 H2O	0	0	0	4.10364	0	0	0.346512	4.21202	4.9023	2.70387	2.45115	4.25467	1.39701	6.60612	4.27248	4.8984	4.8984	4.49023
R_cpd00024_ext_b	1 2-Oxoglutarate = 1 2-Oxoglutarate	0	0.615487	0	0	0	0	0	0	0	0	0	0	0	0	0	0	0	0
R_rxn00907_c0	1 NADP + 1 5-10-Methylenetetrahydrofolate = 1 5-10-Methenyltetrahydrofolate + 1 NADPH	-6.59801	-0.244215	-0.146371	-0.304629	-5.74414	-1.51158	-8.15627	-7.80599	-4.69138	-2.27832	-4.84569	-4.73215	-0.210481	-4.58411	-4.73103	-4.67907	-4.67907	-4.96914
R_rxn05938_c0	1 H+ + 1 CO2 + 1 Reducedferredoxin + 1 Acetyl-CoA = 1 Oxidizedferredoxin + 1 Pyruvate + 1 CoA	-14.9166	-14.7955	-0.485926	-14.2758	-14.9427	1.0457	-17.245	-16.7216	0.600549	0.331234	0.300274	0.521212	0.171138	0.809272	0.523393	0.624499	0.624499	4.06005
R_cpd00159_ext_b	1 L-Lactate = 1 L-Lactate	0	0	13.8125	0	0	0	0	0	0	0	0	0	0	0	0	0	0	0
R_rxn00173_c0	1 H+ + 1 Phosphate + 1 Acetyl-CoA = 1 Acetylphosphate + 1 CoA	18.5455	9.70032	-2.56789	12.1763	17.5279	-5.75228	24.2443	23.1508	3.8386	1.80798	4.4193	3.99203	-0.0325335	3.43495	3.98781	3.79229	3.79229	0.88386
R_rxn01100_c0	1 H+ + 1 ATP + 1 3-Phosphoglycerate = 1 ADP + 1 1,3-Bisphospho-D-glycerate	-18.3769	-18.5347	-19.1218	-18.1723	-18.3852	-19.3529	0	0	0.191753	0.105762	0.0958764	0.166421	0.0546438	0.258397	0.167117	0	0	0.0191753
R_rxn00062_c0	1 ATP + 1 H2O = 1 H+ + 1 Phosphate + 1 ADP	0	0	0	0	0	0	0	0	0	0	0	0	0	0	0	0	0	0
R_cpd00011_ext_b	1 CO2 = 1 CO2	1.57927	14.1795	3.06786	13.5073	3.31378	14.894	0.855895	1.0185	0	5.10291	-10	0	9.40314	0	0	0	0	0
R_cpd00204_ext_b	1 Carbon monoxide = 1 Carbon monoxide	0	0	0	0	0	0	0	0	-10	-10	0	-10	-10	-10	-10	-10	-10	-10
R_rxn07189_c0	1 Carbon monoxide + 1 H2O + 1 Oxidizedferredoxin = 1 CO2 + 1 Reducedferredoxin + 2.0 H+	-6.32748	0	0	0	-5.475	-1.40373	-8.00966	-7.63152	5.34058	7.7393	-4.82971	5.29559	9.79863	5.45896	5.29683	5.35417	5.35417	5.03406
R_rxn00103_c0	2.0 CO2 + 1 NADPH + 1 Reducedferredoxin + 1 H+ = 2.0 Formate + 1 NADP + 1 Oxidizedferredoxin	3.39243	0.206453	0.123738	0.257525	2.96502	0.793035	4.12877	3.96325	2.35673	1.14525	2.42836	2.37565	0.108386	2.30693	2.37513	2.35101	2.35101	2.48567
R_rxn12080_c0	1 Acetyl-CoA + 1 Corrinoid + 1 H+ = 1 Carbon monoxide + 1 Methylcorrinoid + 1 CoA	-6.32748	0	0	0	-5.475	-1.40373	-8.00966	-7.63152	-4.65942	-2.2607	-4.82971	-4.70441	-0.201374	-4.54104	-4.70317	-4.64583	-4.64583	-4.96594
R_rxn06149_c0	1 5-Methyltetrahydrofolate + 1 Corrinoid = 1 Tetrahydrofolate + 1 Methylcorrinoid	6.32748	0	0	0	5.475	1.40373	8.00966	7.63152	4.65942	2.2607	4.82971	4.70441	0.201374	4.54104	4.70317	4.64583	4.64583	4.96594
R_cpd11640_ext_b	1 H2 = 1 H2	0	0	0	0	0	0	0	0	-18.2787	0	-29.1393	-10.3239	8.69994	-17.6804	-10.4717	-18.21	-18.21	-17.8279
R_cpd00363_ext_b	1 Ethanol = 1 Ethanol	0	13.3693	0	11.7289	1.7426	0	0	0	3.95277	0	4.47638	0	0	3.5888	0.0732408	3.911	3.911	0.895277
R_M002	1 Reducedferredoxin + 1 NAD + 3.0 H+ = 1 Oxidizedferredoxin + 1 NADH + 2.0 H+	4.75211	1.4339	0.859415	9.9959	4.31773	1.33508	5.55868	13.2642	12.322	6.64159	7.41098	11.0244	2.94818	15.7356	11.0601	12.3149	12.3149	11.4822
R_cpd00029_ext_b	1 Acetate = 1 Acetate	20.346	0	0	1.53549	17.7816	0	24.768	23.774	0	1.87094	0	4.09111	0	0	4.01407	0	0	0
R_rxn00506_c0	1 Acetaldehyde + 1 NAD + 1 H2O = 1 Acetate + 1 NADH + 2.0 H+	0	0	0	-10.9279	0	0	0	0	0	0	0	0	0	-3.47555	0	0	0	0
R_leq000001_c0	1 NADP + 1 Oxidizedferredoxin + 2.0 H2 = 1 NADPH + 3.0 H+ + 1 Reducedferredoxin	0	0	0	0	0	0	0	0	9.13934	0	14.5697	5.16193	-4.34997	8.84022	5.23585	9.10502	9.10502	8.91393
R_cpd00036_ext_b	1 Succinate = 1 Succinate	0.0537875	0.0485567	0.0291027	0.0605688	0.0535119	0.0214429	0.0291505	0.0346886	0.00635446	0.00350481	0.00317723	0.00551499	0.00181083	0.00856298	0.00553807	0.00660787	0.00660787	0.000635446
R_cpd01947_ext_b	1 BDOH = 1 BDOH	0	0	1.47558	0	0	9.50959	0	0	0	0	0	0	0	0	0	0	0	2
R_leq000002_c0	1 H+ + 1 Reducedferredoxin + 1 NADH + 2.0 NADP = 2.0 NADPH + 1 Oxidizedferredoxin + 1 NAD	8.39053	3.29046	1.97215	4.10445	7.73249	2.50588	7.98263	0	0	1.93303	0	1.32107	2.44873	0	1.28475	0	0	0
R_cpd11416_ext_b	1 Biomass = 1 Biomass	0.476076	0.429778	0.257589	0.536097	0.473636	0.189792	0.258013	0.307031	0.0562436	0.0310213	0.0281218	0.0488135	0.0160278	0.0757914	0.0490178	0.0584866	0.0584866	0.00562436
R_rxn08518_c0	1 CO2 + 1 H2 = 1 Formate + 1 H+	0	0	0	0	0	0	0	0	0	0	0	0	0	0	0	0	0	0
R_rxn00779_c0	1 NADPH + 2.0 H+ + 1 3-Phosphoglycerate = 1 H2O + 1 NADP + 1 Glyceraldehyde3-phosphate	0	0	0	0	0	0	0	-18.9532	0	0	0	0	0	0	0	0	0.1994	0
R_rxn00779_mod_c0	1 NADH + 2.0 H+ + 1 3-Phosphoglycerate = 1 H2O + 1 NAD + 1 Glyceraldehyde3-phosphate	0	0	0	0	0	0	-19.1204	0	0	0	0	0	0	0	0	0.1994	0	0
R_leq000004_c0	1 Acetaldehyde + 1 Oxidizedferredoxin + 1 H2O = 1 Acetate + 3 H+ + 1 Reducedferredoxin	1.54551	-9.93053	2.42991	0	0	5.65062	0.385514	0.458756	-3.86873	0.046351	-4.43437	0.0729355	0.0239482	0	0	-3.82362	-3.82362	-0.886873

## Sheet: TABLE S7 Fluxes
rxn	long reaction	Condition 1	Condition 2	Condition 3	Condition 4	Condition 5	Condition 6	Condition 7	Condition 8	Condition 9	Condition 10	Condition 11	Condition 12	Condition 13	Condition 14	Condition 15	Condition 16	Condition 17	Condition 18
R_rxn12008_c0	1 Isopentenyldiphosphate + 1 all-trans-Heptaprenyl diphosphate = 1 Farnesylfarnesylgeraniol + 1 PPi	0.00755977	0.00682458	0.00409034	0.00851286	0.00752102	0.00301377	0.00409706	0.00487544	0.000893111	0.000492597	0.000446555	0.000775125	0.00025451	0.00120352	0.000778369	0.000928728	0.000928728	8.93111e-05
R_rxn00541_c0	1 L-Threonine = 1 Acetaldehyde + 1 Glycine	0.703778	0.635336	0.380791	0.792507	0.700171	0.280567	0.381417	0.45388	0.0831443	0.0458584	0.0415722	0.0721604	0.0236937	0.112042	0.0724624	0.0864601	0.0864601	0.00831443
R_rxn00225_c0	1 H+ + 1 ATP + 1 Acetate = 1 Acetylphosphate + 1 ADP	-18.5455	-9.70032	2.56789	-12.1763	-17.5279	5.75228	-24.2443	-23.1508	-3.8386	-1.80798	-4.4193	-3.99203	0.0325335	-3.43495	-3.98781	-3.79229	-3.79229	-0.88386
R_rxn01199_c0	1 ATP + 1 D-Lyxulose = 1 D-Xylulose5-phosphate + 1 ADP	0	0	0	0	0	0	0	0	0	0	0	0	0	0	0	0	0	0
R_rxn10215_c0	1 1-anteisoheptadecanoyl-sn-glycerol 3-phosphate + 1 fa12coa = 1 1,2-dianteisoheptadecanoyl-sn-glycerol 3-phosphate + 1 CoA	0.0197918	0.0178671	0.0107087	0.022287	0.0196904	0.00789017	0.0107263	0.0127641	0.0023382	0.00128964	0.0011691	0.00202931	0.000666318	0.00315086	0.0020378	0.00243145	0.00243145	0.00023382
R_rxn02483_c0	1 H+ + 1 4-Carboxymuconolactone = 1 3-oxoadipate-enol-lactone + 1 CO2	0	0	0	0	0	0	0	0	0	0	0	0	0	0	0	0	0	0
R_rxn00802_c0	1 L-Argininosuccinate = 1 Fumarate + 1 L-Arginine	0.0920721	0.0831181	0.0498172	0.10368	0.0916002	0.0367053	0.049899	0.0593791	0.0108774	0.00599945	0.0054387	0.00944042	0.00309973	0.0146579	0.00947993	0.0113112	0.0113112	0.00108774
R_rxn03638_c0	1 D-Glucosamine1-phosphate + 1 Acetyl-CoA = 1 H+ + 1 N-Acetyl-D-glucosamine1-phosphate + 1 CoA	0.0945804	0.0853825	0.0511743	0.106505	0.0940956	0.0377053	0.0512584	0.0609967	0.0111737	0.00616289	0.00558686	0.0096976	0.00318418	0.0150572	0.00973818	0.0116193	0.0116193	0.00111737
R_rxn06078_c0	1 O-Acetyl-L-homoserine + 1 H2S2O3 + 1 trdrd = 1 trdox + 1 Homocysteine + 1 Sulfite + 1 Acetate	0	0	0	0	0	0	0	0	0	0	0	0	0	0	0	0	0	0
R_rxn00868_c0	1 H+ + 1 Crotonyl-CoA + 1 NADH = 1 NAD + 1 Butyryl-CoA	0	0	0	0	0	0	0	0	0	0	0	0	0	0	0	0	0	0
R_rxn01675_c0	1 TTP + 1 Glucose-1-phosphate = 1 dTDPglucose + 1 PPi	0	0	0	0	0	0	0	0	0	0	0	0	0	0	0	0	0	0
R_rxn12636_c0	1 H+ + 1 H2O + 1 met-L-ala-L = 1 L-Methionine + 1 L-Alanine	0	0	0	0	0	0	0	0	0	0	0	0	0	0	0	0	0	0
R_rxn12644_c0	1 H2O + 1 ala-L-Thr-L = 1 L-Threonine + 1 L-Alanine	0	0	0	0	0	0	0	0	0	0	0	0	0	0	0	0	0	0
R_rxn05536_c0	1 ATP + 1 H2O + 1 met-L-ala-L = 1 H+ + 1 Phosphate + 1 ADP + 1 met-L-ala-L	0	0	0	0	0	0	0	0	0	0	0	0	0	0	0	0	0	0
R_rxn05544_c0	1 ATP + 1 H2O + 1 Ala-Leu = 1 H+ + 1 Phosphate + 1 ADP + 1 Ala-Leu	0	0	0	0	0	0	0	0	0	0	0	0	0	0	0	0	0	0
R_rxn05549_c0	1 ATP + 1 H2O + 1 Thyminose = 1 H+ + 1 Phosphate + 1 Thyminose + 1 ADP	0	0	0	0	0	0	0	0	0	0	0	0	0	0	0	0	0	0
R_rxn03910_c0	1 2-phospho-4--cytidine5-diphospho-2-C-methyl-D-erythritol = 1 2-C-methyl-D-erythritol2-4-cyclodiphosphate + 1 CMP	0.0699362	0.0631349	0.0378402	0.0787534	0.0695777	0.0278807	0.0379023	0.0451032	0.00826226	0.00455706	0.00413113	0.00717076	0.0023545	0.0111338	0.00720077	0.00859176	0.00859176	0.000826226
R_rxn05616_c0	1 Mg = 1 Mg	-0.00377988	-0.00341229	-0.00204517	-0.00425643	-0.00376051	-0.00150688	-0.00204853	-0.00243772	-0.000446555	-0.000246298	-0.000223278	-0.000387562	-0.000127255	-0.000601758	-0.000389184	-0.000464364	-0.000464364	-4.46555e-05
R_cpd00254_ext_b	1 Mg = 1 Mg	-0.00377988	-0.00341229	-0.00204517	-0.00425643	-0.00376051	-0.00150688	-0.00204853	-0.00243772	-0.000446555	-0.000246298	-0.000223278	-0.000387562	-0.000127255	-0.000601758	-0.000389184	-0.000464364	-0.000464364	-4.46555e-05
R_rxn08527_c0	1 Fumarate + 1 Menaquinol 8 = 1 Succinate + 1 Menaquinone 8	0	0	0	0	0	0	0	0	0.00546135	0.00301222	0.00273067	0.00473987	0	0	0	0.00567915	0.00567915	0.000546135
R_rxn12848_c0	1 ATP + 1 Gly-Cys + 1 H2O = 1 Gly-Cys + 1 Phosphate + 1 ADP	0	0	0	0	0	0	0	0	0	0	0	0	0	0	0	0	0	0
R_rxn00369_c0	1 Cytidine + 1 GTP = 1 CMP + 1 GDP	0	0	0	0	0	0	0	0	0	0	0	0	0	0	0	0	0	0
R_rxn02212_c0	1 DAHP = 1 H+ + 1 5-Dehydroquinate + 1 Phosphate	0.185366	0.167339	0.100295	0.208736	0.184416	0.0738978	0.10046	0.119546	0.0218991	0.0120785	0.0109496	0.0190061	0.0062406	0.0295103	0.0190857	0.0227725	0.0227725	0.00218991
R_rxn03419_c0	1 H2O + 1 Formamidopyrimidine nucleoside triphosphate = 1 H+ + 1 2,5-Diaminopyrimidine nucleoside triphosphate + 1 Formate	0	0.0102369	0	0.0127693	0.0112815	0.00452065	0.00614559	0.00731316	0.00133967	0.000738895	0	0	0	0	0.00116755	0.00139309	0.00139309	0.000133967
R_rxn02160_c0	1 H2O + 1 L-histidinol-phosphate = 1 L-Histidinol + 1 H+ + 1 Phosphate	0.0390136	0.0352196	0.021109	0.0439322	0.0388137	0.0155531	0.0211437	0.0251606	0.00460907	0.00254214	0.00230453	0.00400018	0.00131345	0.00621097	0.00401692	0.00479287	0.00479287	0.000460907
R_rxn05614_c0	1 ATP + 1 H2O + 1 L-methionine R-oxide = 1 H+ + 1 Phosphate + 1 L-methionine R-oxide + 1 ADP	0	0	0	0	0	0	0	0	0	0	0	0	0	0	0	0	0	0
R_rxn10304_c0	1 Isopentadecanoyllipoteichoic acid (n-24), linked, unsubstituted + 24.0 UDP-glucose = 1 Isopentadecanoyllipoteichoic acid (n-24), linked, glucose substituted + 24.0 UDP	0	0	0	0	0	0	0	0	0	0	0	0	0	0	0	0	0	0
R_rxn01302_c0	1 NADP + 1 L-Homoserine = 1 H+ + 1 L-Aspartate4-semialdehyde + 1 NADPH	0	0	0	0	0	0	0	0	-1.289	0	0	0	0	0	0	0	0	-1.3789
R_rxn05422_c0	1 H+ + 1 10-methyl-3-oxo-undecanoyl-ACP + 1 NADPH = 1 NADP + 1 10-methyl-3-hydroxy-undecanoyl-ACP	0	0	0	0	0	0	0	0	0	0	0	0	0	0	0	0	0	0
R_rxn00048_c0	2.0 6-7-Dimethyl-8--1-D-ribityllumazine = 1 4--1-D-Ribitylamino-5-aminouracil + 1 Riboflavin	0.00755977	0.00682458	0.00409034	0.00851286	0.00752102	0.00301377	0.00409706	0.00487544	0.000893111	0.000492597	0.000446555	0.000775125	0.00025451	0.00120352	0.000778369	0.000928728	0.000928728	8.93111e-05
R_rxn07584_c0	1 H+ + 1 ATP + 1 Lipoate = 1 Lipoyl-AMP + 1 PPi	0	0	0	0	0	0	0	0	0	0	0	0	0	0	0	0	0	0
R_rxn05298_c0	1 Na+ + 1 L-Glutamate = 1 Na+ + 1 L-Glutamate	0	0	0	0	0	0	0	0	0	0	0	0	0	0	0	0	0	0
R_rxn00879_c0	1 L-Inositol + 1 NAD = 1 H+ + 1 2-Inosose + 1 NADH	0	0	0	0	0	0	0	0	0	0	0	0	0	0	0	0	0	0
R_rxn05229_c0	1 ATP + 1 AIR + 1 H2CO3 = 1 5'-Phosphoribosyl-4-carboxy-5-aminoimidazole + 1 H+ + 1 Phosphate + 1 ADP	0.0909339	0.0820906	0.0492013	0.102398	0.0904678	0.0362516	0.0492822	0.058645	0.0107429	0.00592528	0.00537146	0.00932371	0.00306141	0.0144767	0.00936273	0.0111714	0.0111714	0.00107429
R_rxn12637_c0	1 gly-asp-L + 1 H2O = 1 L-Aspartate + 1 Glycine	0	0	0	0	0	0	0	0	0	0	0	0	0	0	0	0	0	0
R_rxn08297_c0	1 ATP + 1 1,2-Diacyl-sn-glycerol dihexadecanoyl = 1 1,2-dihexadecanoyl-sn-glycerol 3-phosphate + 1 ADP	0	0	0	0	0	0	0	0	0	0	0	0	0	0	0	0	0	0
R_rxn00902_c0	1 3-Methyl-2-oxobutanoate + 1 H2O + 1 Acetyl-CoA = 1 H+ + 1 2-Isopropylmalate + 1 CoA	0.205001	0.185065	0.110919	0.230847	0.203951	0.0817255	0.111102	0.132209	0.0242188	0.0133579	0.0121094	0.0210194	0.00690165	0.0326362	0.0211073	0.0251847	0.0251847	0.00242188
R_rxn03852_c0	1 Undecaprenyl diphospho N-acetyl-glucosamine + 1 UDP-N-acetyl-D-mannosamine = 1 N-Acetyl-beta-D-mannosaminyl-1,4-N-acetyl-D- glucosaminyldiphosphoundecaprenol + 1 UDP	0.00257947	0.00232861	0.00139566	0.00290467	0.00256624	0.00102833	0.00139796	0.00166355	0.000304738	0.000168079	0.000152369	0.00026448	8.68412e-05	0.000410651	0.000265587	0.000316891	0.000316891	3.04738e-05
R_rxn00952_c0	1 O-Acetyl-L-homoserine + 1 H2S = 1 H+ + 1 Homocysteine + 1 Acetate	0.100048	0.0903181	0.0541325	0.112661	0.0995349	0.0398849	0.0542215	0.0645227	0.0118196	0.00651914	0.00590982	0.0102582	0.00336824	0.0159276	0.0103011	0.012291	0.012291	0.00118196
R_rxn03909_c0	1 Glyceraldehyde3-phosphate + 1 H+ + 1 Pyruvate = 1 1-deoxy-D-xylulose5-phosphate + 1 CO2	0.0737161	0.0665472	0.0398853	0.0830098	0.0733382	0.0293875	0.0399509	0.0475409	0.00870881	0.00480336	0.00435441	0.00755832	0.00248175	0.0117356	0.00758995	0.00905612	0.00905612	0.000870881
R_rxn05187_c0	1 ATP + 1 H2O + 1 Vitamin B12 = 1 H+ + 1 Phosphate + 1 Vitamin B12 + 1 ADP	0	0	0	0	0	0	0	0	0	0	0	0	0	0	0	0	0	0
R_rxn10230_c0	1 L-Serine + 1 CDP-1,2-dianteisopentadecanoylglycerol = 1 H+ + 1 Dianteisopentadecanoylphosphatidylserine + 1 CMP	0	0	0	0	0	0	0	0	0	0	0	0	0	0	0	0	0	0
R_rxn05372_c0	1 H+ + 1 10-methyl-3-oxo-dodecanoyl-ACP + 1 NADPH = 1 10-methyl-3-hydroxy-dodecanoyl-ACP + 1 NADP	0.0395836	0.0357341	0.0214174	0.0445741	0.0393807	0.0157803	0.0214526	0.0255282	0.00467641	0.00257928	0.0023382	0.00405862	0.00133264	0.00630171	0.00407561	0.0048629	0.0048629	0.000467641
R_rxn00459_c0	1 2-Phospho-D-glycerate = 1 H2O + 1 Phosphoenolpyruvate	18.4903	18.6371	19.1831	18.3	18.498	19.3981	19.1818	19.0264	-0.178357	-0.0983732	-0.0891785	-0.154795	-0.0508264	-0.240346	-0.155443	-0.18547	-0.18547	-0.0178357
R_rxn00405_c0	1 H+ + 1 L-Arginine = 1 CO2 + 1 Agmatine	0	0	0	0	0	0	0	0	0	0	0	0	0	0	0	0	0	0
R_rxn10277_c0	1 Monoglucosyl-1,2 diisopentadecanoylglycerol + 1 UDP-glucose = 1 UDP + 1 Diglucosyl-1,2 diisopentadecanoylglycerol	0	0	0	0	0	0	0	0	0	0	0	0	0	0	0	0	0	0
R_rxn10225_c0	1 1,2-diisohexadecanoyl-sn-glycerol 3-phosphate + 1 CTP = 1 CDP-1,2-diisohexadecanoylglycerol + 1 PPi	0	0	0	0	0	0	0	0	0	0	0	0	0	0	0	0	0	0
R_rxn10259_c0	1 CDP-1,2-diisoheptadecanoylglycerol + 1 Glycerol-3-phosphate = 1 Diisoheptadecanoylphosphatidylglycerophosphate + 1 CMP	0.0122644	0.0110717	0.00663586	0.0138106	0.0122015	0.0048893	0.00664676	0.00790954	0.00144891	0.000799152	0.000724457	0.0012575	0.000412898	0.00195249	0.00126277	0.0015067	0.0015067	0.000144891
R_rxn00929_c0	1 L-Proline + 1 NAD = 1 H+ + 1 NADH + 1 1-Pyrroline-5-carboxylate	-0.0766617	-0.0692064	-0.0414791	-0.0863268	-0.0762688	-0.0305619	-0.0415473	-0.0494406	-0.00905681	-0.0049953	-0.00452841	-0.00786035	-0.00258092	-0.0122046	-0.00789324	-0.009418	-0.009418	-0.000905681
R_rxn05316_c0	1 Inosine + 1 H+ = 1 Inosine + 1 H+	0	0	0	0	0	0	0	0	0	0	0	0	0	0	0	0	0	0
R_cpd00067_ext_b	1 H+ = 1 H+	29.2126	2.90768	15.1863	4.39474	25.7827	2.41597	34.1537	33.043	4.95939	4.29709	4.97969	9.05587	0.286857	4.94527	8.97868	4.95777	4.95777	4.99594
R_rxn08311_c0	1 1,2-dioctadecanoyl-sn-glycerol 3-phosphate + 1 CTP = 1 CDP-1,2-dioctadecanoylglycerol + 1 PPi	0.0163525	0.0147622	0.00884781	0.0184142	0.0162687	0.00651907	0.00886235	0.0105461	0.00193189	0.00106554	0.000965943	0.00167667	0.00055053	0.00260332	0.00168369	0.00200893	0.00200893	0.000193189
R_rxn10288_c0	1 1,2-Diisohexadecanoyl-sn-glycerol + 1 UDP-glucose = 1 UDP + 1 Monoglucosyl-1,2 diisohexadecanoylglycerol	0	0	0	0	0	0	0	0	0	0	0	0	0	0	0	0	0	0
R_rxn01492_c0	1 D-fructose-1-phosphate + 1 ATP = 1 ADP + 1 D-fructose-1,6-bisphosphate	0	0	0	0	0	0	0	9.71072	0	0	0	0	0	0	0	0	0	0
R_rxn01101_c0	1 NAD + 1 3-Phosphoglycerate = 1 H+ + 1 NADH + 1 3-Phosphonooxypyruvate	0	0	0	0	0	0	0	0	0	0	0	0	0	0	0	0	0	0
R_rxn10193_c0	1 Prenol-45n teichoic acid + 45.0 UDP-glucose = 45.0 UDP + 1 Prenol-45n teichoic acid-glucose substituted	0.000859822	0.000776204	0.000465221	0.000968223	0.000855415	0.000342775	0.000465986	0.000554515	0.000101579	5.60262e-05	5.07896e-05	8.816e-05	2.89471e-05	0.000136884	8.85289e-05	0.00010563	0.00010563	1.01579e-05
R_rxn00358_c0	1 UDP-galactose = 1 UDP-D-galacto-1,4-furanose	0	0	0	0	0	0	0	0	0	0	0	0	0	0	0	0	0	0
R_rxn00302_c0	1 H2O + 1 GTP = 1 Formamidopyrimidine nucleoside triphosphate	0	0.0102369	0	0.0127693	0.0112815	0.00452065	0.00614559	0.00731316	0.00133967	0.000738895	0	0	0	0	0.00116755	0.00139309	0.00139309	0.000133967
R_rxn05621_c0	1 ATP + 1 H2O + 1 methanesulfonate = 1 H+ + 1 Phosphate + 1 ADP + 1 methanesulfonate	0	0	0	0	0	0	0	0	0	0	0	0	0	0	0	0	0	0
R_rxn05145_c0	1 ATP + 1 H2O + 1 Phosphate = 1 H+ + 2.0 Phosphate + 1 ADP	0	0	0	0	0	0	0	0	0	0	0	0	0	0	0	0	0	0
R_cpd00009_ext_b	1 Phosphate = 1 Phosphate	-0.591357	-0.533848	-0.319964	-0.665912	-0.588326	-0.23575	-0.32049	-0.381378	-0.0698629	-0.038533	-0.0349315	-0.0606335	-0.0199088	-0.0941441	-0.0608873	-0.072649	-0.072649	-0.00698629
R_rxn05341_c0	1 (R)-3-Hydroxyoctanoyl-[acyl-carrier protein] + 1 NADP = 1 H+ + 1 3-oxooctanoyl-acp + 1 NADPH	0	0	0	0	0	0	0	0	0	0	0	0	0	0	0	0	0	0
R_rxn02988_c0	1 Iminoaspartate + 1 Glycerone-phosphate = 1 Quinolinate + 1 H+ + 2.0 H2O + 1 Phosphate	0.00755977	0.00682458	0.00409034	0.00851286	0.00752102	0.00301377	0.00409706	0.00487544	0.000893111	0.000492597	0.000446555	0.000775125	0.00025451	0.00120352	0.000778369	0.000928728	0.000928728	8.93111e-05
R_rxn05460_c0	1 H+ + 1 hexadecanoyl-acp + 1 Malonyl-acyl-carrierprotein- = 1 ACP + 1 CO2 + 1 3-Oxooctodecanoyl-ACP	0	0	0	0	0	0	0	0	0	0	0	0	0	0	0	0	0	0
R_rxn10281_c0	1 1,2-Diacyl-sn-glycerol ditetradecanoyl + 1 UDP-glucose = 1 UDP + 1 Monoglucosyl-1,2 dimyristoylglycerol	0	0	0	0	0	0	0	0	0	0	0	0	0	0	0	0	0	0
R_rxn10199_c0	1 Peptidoglycan polymer (n-1 subunits) + 1 Undecaprenyl-diphospho-N-acetylmuramoyl--N-acetylglucosamine-L-ala-D-glu-meso-2-6-diaminopimeloyl-D-ala-D-ala = 1 Bactoprenyl diphosphate + 1 Peptidoglycan polymer (n subunits)	0.000859822	0.000776204	0.000465221	0.000968223	0.000855415	0.000342775	0.000465986	0.000554515	0.000101579	5.60262e-05	5.07896e-05	8.816e-05	2.89471e-05	0.000136884	8.85289e-05	0.00010563	0.00010563	1.01579e-05
R_rxn09200_c0	2.0 H+ + 1 phosphatidylserine dihexadecanoyl = 1 phosphatidylethanolamine dihexadecanoyl + 1 CO2	0	0	0	0	0	0	0	0	0	0	0	0	0	0	0	0	0	0
R_rxn02937_c0	1 ATP + 1 5'-Phosphoribosylformylglycinamidine = 1 H+ + 1 Phosphate + 1 ADP + 1 AIR	0.0947138	0.0855029	0.0512465	0.106655	0.0942284	0.0377585	0.0513307	0.0610827	0.0111895	0.00617158	0.00559474	0.00971128	0.00318867	0.0150784	0.00975192	0.0116357	0.0116357	0.00111895
R_rxn00640_c0	1 D-Mannose1-phosphate + 1 GDP = 1 H+ + 1 Phosphate + 1 GDP-mannose	0	0	0	0	0	0	0	0	0	0	0	0	0	0	0	0	0	0
R_rxn00649_c0	1 H2S + 1 O-Acetyl-L-serine = 1 H+ + 1 L-Cysteine + 1 Acetate	0	0	0	0	0	0	0	0	0	0	0	0	0	0	0	0	0	0
R_rxn01763_c0	1 ATP + 1 L-Ribulose = 1 L-ribulose-5-phosphate + 1 ADP	0	0	0	0	0	0	0	0	0	0	0	0	0	0	0	0	0	0
R_rxn12851_c0	1 ATP + 1 H2O + 1 Gly-Tyr = 1 Phosphate + 1 ADP + 1 Gly-Tyr	0	0	0	0	0	0	0	0	0	0	0	0	0	0	0	0	0	0
R_rxn01446_c0	1 H+ + 1 Phosphate + 1 Deoxyguanosine = 1 Guanine + 1 deoxyribose-1-phosphate	0	0	0	0	0	0	0	0	0	0	0	0	0	0	0	0	0	0
R_rxn05346_c0	1 Butyryl-ACP + 1 H+ + 1 Malonyl-acyl-carrierprotein- = 1 ACP + 1 CO2 + 1 3-Oxohexanoyl-[acp]	0	0	0	0	0	0	0	0	0	0	0	0	0	0	0	0	0	0
R_rxn01654_c0	1 NH3 + 1 5-10-Methenyltetrahydrofolate = 2.0 H+ + 1 5-Formiminotetrahydrofolate	0	0	0	0	0	0	0	0	0	0	0	0	0	0	0	0	0	0
R_rxn00558_c0	1 D-glucose-6-phosphate = 1 D-fructose-6-phosphate	-1000	-1000	999.92	999.834	-1000	-1000	999.92	999.905	999.983	999.99	-1000	999.985	999.995	999.977	999.985	999.982	999.982	999.998
R_rxn01406_c0	1 Putrescine + 1 S-Adenosylmethioninamine = 1 H+ + 1 5-Methylthioadenosine + 1 Spermidine	0.00377988	0.00341229	0.00204517	0.00425643	0.00376051	0.00150688	0.00204853	0.00243772	0.000446555	0.000246298	0.000223278	0.000387562	0.000127255	0.000601758	0.000389184	0.000464364	0.000464364	4.46555e-05
R_rxn10340_c0	2.0 Diisopentadecanoylphosphatidylglycerol = 1 Isopentadecanoylcardiolipin (B. subtilis) + 1 Glycerol	0	0	0	0	0	0	0	0	0	0	0	0	0	0	0	0	0	0
R_rxn00375_c0	1 H2O + 1 N-Formyl-L-glutamate = 1 L-Glutamate + 1 Formate	0	0	0	0	0	0	0	0	0	0	0	0	0	0	0	0	0	0
R_rxn00143_c0	1 H2O + 1 S-Adenosyl-homocysteine = 1 Adenine + 1 S-Ribosylhomocysteine	0	0	0	0	0	0	0	0	0	0	0	0	0	0	0	0	0	0
R_rxn00187_c0	1 ATP + 1 NH3 + 1 L-Glutamate = 1 H+ + 1 Phosphate + 1 L-Glutamine + 1 ADP	0	0	0	0	0	0	0	0	0	0	0	0	0	0	0	0	0	0
R_rxn02875_c0	1 H2O + 1 N-Acetylmuramoyl-Ala = 1 N-Acetyl-D-muramoate + 1 L-Alanine	0	0	0	0	0	0	0	0	0	0	0	0	0	0	0	0	0	0
R_rxn00737_c0	1 L-Threonine = 1 NH3 + 1 2-Oxobutyrate	0.126095	0.113832	0.0682256	0.141992	0.125448	0.0502687	0.0683377	0.0813208	0.0148968	0.00821636	0.0074484	0.0129288	0.00424514	0.0200743	0.0129829	0.0154909	0.0154909	0.00148968
R_rxn01200_c0	1 Sedoheptulose7-phosphate + 1 Glyceraldehyde3-phosphate = 1 D-Xylulose5-phosphate + 1 ribose-5-phosphate	0.0169241	0.0152782	0.00915707	0.0190578	0.0168373	0.00674693	0.00917211	0.0109147	0.00199941	0.00110278	0.000999705	0.00173527	0.000569773	0.00269432	0.00174254	0.00207915	0.00207915	0.000199941
R_rxn05232_c0	1 ATP + 1 trdrd = 1 trdox + 1 H2O + 1 dATP	0.00639689	0.0057748	0.00346115	0.00720338	0.00636411	0.00255018	0.00346684	0.00412548	0.000755728	0.000416824	0.000377864	0.000655892	0.00021536	0.00101839	0.000658637	0.000785867	0.000785867	7.55728e-05
R_rxn03841_c0	1 ADC = 1 H+ + 1 Pyruvate + 1 ABEE	0.0113397	0.0102369	0.00613551	0.0127693	0.0112815	0.00452065	0.00614559	0.00731316	0.00133967	0.000738895	0.000669833	0.00116269	0.000381765	0.00180527	0.00116755	0.00139309	0.00139309	0.000133967
R_rxn04454_c0	1 Isochorismate = 1 SALC + 1 Pyruvate	0	0	0	0	0	0	0	0	0	0	0	0	0	0	0	0	0	0
R_rxn00193_c0	1 L-Glutamate = 1 D-Glutamate	0.000859822	0.000776204	0.000465221	0.000968223	0.000855415	0.000342775	0.000465986	0.000554515	0.000101579	5.60262e-05	5.07896e-05	8.816e-05	2.89471e-05	0.000136884	8.85289e-05	0.00010563	0.00010563	1.01579e-05
R_rxn05175_c0	1 ATP + 1 H2O + 1 Spermidine = 1 H+ + 1 Phosphate + 1 Spermidine + 1 ADP	0	0	0	0	0	0	0	0	0	0	0	0	0	0	0	0	0	0
R_rxn08294_c0	1 ATP + 1 1,2-Diacyl-sn-glycerol didodecanoyl = 1 1,2-didodecanoyl-sn-glycerol 3-phosphate + 1 ADP	0	0	0	0	0	0	0	0	0	0	0	0	0	0	0	0	0	0
R_rxn05958_c0	1 S-Ribosylhomocysteine = 1 4-5-dihydroxy-2-3-pentanedione + 1 Homocysteine	0	0	0	0	0	0	0	0	0	0	0	0	0	0	0	0	0	0
R_rxn12844_c0	1 Gly-Cys + 1 H2O = 1 L-Cysteine + 1 Glycine	0	0	0	0	0	0	0	0	0	0	0	0	0	0	0	0	0	0
R_rxn01332_c0	1 D-Erythrose4-phosphate + 1 H2O + 1 Phosphoenolpyruvate = 1 DAHP + 1 H+ + 1 Phosphate	0.185366	0.167339	0.100295	0.208736	0.184416	0.0738978	0.10046	0.119546	0.0218991	0.0120785	0.0109496	0.0190061	0.0062406	0.0295103	0.0190857	0.0227725	0.0227725	0.00218991
R_rxn01858_c0	1 Deoxyadenosine + 1 H+ + 1 H2O = 1 NH3 + 1 Deoxyinosine	0	0	0	0	0	0	0	0	0	0	0	0	0	0	0	0	0	0
R_rxn08657_c0	1 2-Demethylmenaquinone 8 + 1 Glycolate = 1 Glyoxalate + 1 2-Demethylmenaquinol 8	0	0	0	0	0	0	0	0	0	0	0	0	0	0	0	0	0	0
R_rxn09208_c0	1 L-Serine + 1 CDP-1,2-dihexadecanoylglycerol = 1 H+ + 1 phosphatidylserine dihexadecanoyl + 1 CMP	0	0	0	0	0	0	0	0	0	0	0	0	0	0	0	0	0	0
R_rxn05567_c0	1 Dulcose + 1 Phosphoenolpyruvate = 1 Pyruvate + 1 Galactitol 1-phosphate	0	0	0	0	0	0	0	0	0	0	0	0	0	0	0	0	0	0
R_rxn10060_c0	1 TTP + 1 NAD = 1 NADP + 1 dTDP	-999.996	-999.997	-999.998	-999.996	-999.996	-999.998	-999.998	-999.998	-1000	-1000	-1000	-1000	-1000	-999.999	-1000	-1000	-1000	-1000
R_rxn06377_c0	1 H+ + 1 Lipoylprotein + 1 Glycine = 1 CO2 + 1 S-Aminomethyldihydrolipoylprotein	0	0	0	0	0	0	0	0	0	0	0	0	0	0	0	0	0	0
R_rxn00762_c0	1 NAD + 1 Glycerol = 1 H+ + 1 NADH + 1 Glycerone	0	0	0	0	0	0	0	0	0	0	0	0	0	0	0	0	0	0
R_rxn00100_c0	1 Dephospho-CoA + 1 ATP = 1 CoA + 1 ADP	0.00755977	0.00682458	0.00409034	0.00851286	0.00752102	0.00301377	0.00409706	0.00487544	0.000893111	0.000492597	0.000446555	0.000775125	0.00025451	0.00120352	0.000778369	0.000928728	0.000928728	8.93111e-05
R_rxn01018_c0	1 L-Aspartate + 1 Carbamoylphosphate = 2.0 H+ + 1 Phosphate + 1 N-Carbamoyl-L-aspartate	0.0462278	0.0417321	0.0250123	0.0520559	0.0459908	0.0184291	0.0250534	0.0298132	0.00546135	0.00301222	0.00273067	0.00473987	0.00155632	0.00735947	0.0047597	0.00567915	0.00567915	0.000546135
R_rxn05656_c0	1 ATP + 1 Sulfoacetate + 1 H2O = 1 H+ + 1 Sulfoacetate + 1 Phosphate + 1 ADP	0	0	0	0	0	0	0	0	0	0	0	0	0	0	0	0	0	0
R_rxn00806_c0	1 2-Oxoglutarate + 1 L-Leucine = 1 4MOP + 1 L-Glutamate	-0.165418	-0.149331	-0.0895021	-0.186273	-0.16457	-0.0659452	-0.0896491	-0.106681	-0.0195424	-0.0107787	-0.00977122	-0.0169607	-0.00556901	-0.0263345	-0.0170317	-0.0203218	-0.0203218	-0.00195424
R_rxn02834_c0	1 H2O + 1 Phosphoribosyl-ATP = 1 Phosphoribosyl-AMP + 1 PPi	0.0390136	0.0352196	0.021109	0.0439322	0.0388137	0.0155531	0.0211437	0.0251606	0.00460907	0.00254214	0.00230453	0.00400018	0.00131345	0.00621097	0.00401692	0.00479287	0.00479287	0.000460907
R_rxn10121_c0	2.0 H+ + 1 Nitrate + 1 Menaquinol 8 = 1 Nitrite + 2.0 H+ + 1 H2O + 1 Menaquinone 8	0	0	0	0	0	0	0	0	0	0	0	0	0	0	0	0	0	0
R_rxn02341_c0	1 H+ + 1 (R)-4'-Phosphopantothenoyl-L-cysteine = 1 CO2 + 1 Phosphopantetheine	0.00755977	0.00682458	0.00409034	0.00851286	0.00752102	0.00301377	0.00409706	0.00487544	0.000893111	0.000492597	0.000446555	0.000775125	0.00025451	0.00120352	0.000778369	0.000928728	0.000928728	8.93111e-05
R_rxn09310_c0	1 ATP + 1 1-deoxy-D-xylulose5-phosphate + 1 L-Tyrosine + 1 L-Cysteine = 1 4-Hydroxy-benzylalcohol + 1 AMP + 1 4-Methyl-5--2-phosphoethyl-thiazole + 1 L-Alanine + 1 H2O + 1 CO2 + 1 PPi	0.00377988	0.00341229	0.00204517	0.00425643	0.00376051	0.00150688	0.00204853	0.00243772	0.000446555	0.000246298	0.000223278	0.000387562	0.000127255	0.000601758	0.000389184	0.000464364	0.000464364	4.46555e-05
R_rxn03175_c0	1 phosphoribosylformiminoaicar-phosphate = 1 phosphoribulosylformimino-AICAR-phosphate	0.0390136	0.0352196	0.021109	0.0439322	0.0388137	0.0155531	0.0211437	0.0251606	0.00460907	0.00254214	0.00230453	0.00400018	0.00131345	0.00621097	0.00401692	0.00479287	0.00479287	0.000460907
R_rxn00157_c0	1 Pyruvate + 1 CoA = 1 Formate + 1 Acetyl-CoA	0	0	0	0	0	0	0	0	0	0	0	0	0	0	0	0	0	0
R_rxn05649_c0	1 H+ + 1 D-Serine = 1 H+ + 1 D-Serine	0	0	0	0	0	0	0	0	0	0	0	0	0	0	0	0	0	0
R_rxn10219_c0	1 1-isohexadecanoyl-sn-glycerol 3-phosphate + 1 fa6coa = 1 1,2-diisohexadecanoyl-sn-glycerol 3-phosphate + 1 CoA	0	0	0	0	0	0	0	0	0	0	0	0	0	0	0	0	0	0
R_rxn00786_c0	1 D-fructose-1,6-bisphosphate = 1 Glyceraldehyde3-phosphate + 1 Glycerone-phosphate	0	9.59506	9.7573	0	0	9.82118	0	9.71072	-0.0529928	-0.0292283	-0.0264964	-0.0459921	-0.0151014	-0.0714107	-0.0461846	-0.0551062	-0.0551062	-0.00529928
R_rxn00074_c0	1 H+ + 2.0 Cbl + 1 NAD = 2.0 Vitamin B12r + 1 NADH	0	0	0	0	0	0	0	0	0	0	0	0	0	0	0	0	0	0
R_rxn01637_c0	1 2-Oxoglutarate + 1 N-Acetylornithine = 1 2-Acetamido-5-oxopentanoate + 1 L-Glutamate	-0.0996319	-0.0899427	-0.0539075	-0.112193	-0.0991212	-0.0397191	-0.0539961	-0.0642545	-0.0117705	-0.00649204	-0.00588525	-0.0102155	-0.00335424	-0.0158614	-0.0102583	-0.0122399	-0.0122399	-0.00117705
R_rxn09674_c0	1 H+ + 1 L-Lysine = 1 H+ + 1 L-Lysine	0	0	0	0	0	0	0	0	0	0	0	0	0	0	0	0	0	0
R_rxn00689_c0	1 ATP + 1 Tetrahydrofolate + 1 L-Glutamate = 1 H+ + 1 Phosphate + 1 THF-L-glutamate + 1 ADP	0	0	0	0	0	0	0	0	0	0	0	0	0	0	0	0	0	0
R_rxn12640_c0	1 H2O + 1 ala-L-glu-L = 1 L-Glutamate + 1 L-Alanine	0	0	0	0	0	0	0	0	0	0	0	0	0	0	0	0	0	0
R_rxn10206_c0	1 fa12coa + 1 Glycerol-3-phosphate = 1 1-anteisoheptadecanoyl-sn-glycerol 3-phosphate + 1 CoA	0.0197918	0.0178671	0.0107087	0.022287	0.0196904	0.00789017	0.0107263	0.0127641	0.0023382	0.00128964	0.0011691	0.00202931	0.000666318	0.00315086	0.0020378	0.00243145	0.00243145	0.00023382
R_rxn05376_c0	1 H+ + 1 12-methyl-3-oxo-tetra-decanoyl-ACP + 1 NADPH = 1 12-methyl-3-hydroxy-tetra-decanoyl-ACP + 1 NADP	0.0395836	0.0357341	0.0214174	0.0445741	0.0393807	0.0157803	0.0214526	0.0255282	0.00467641	0.00257928	0.0023382	0.00405862	0.00133264	0.00630171	0.00407561	0.0048629	0.0048629	0.000467641
R_rxn05342_c0	1 HMA + 1 NADP = 1 H+ + 1 3-oxotetradecanoyl-acp + 1 NADPH	0	0	0	0	0	0	0	0	0	0	0	0	0	0	0	0	0	0
R_rxn06510_c0	1 Lauroyl-CoA + 1 Acetyl-CoA = 1 CoA + 1 3-Oxotetradecanoyl-CoA	0	0	0	0	0	0	0	0	0	0	0	0	0	0	0	0	0	0
R_rxn10278_c0	1 UDP-glucose + 1 Monoglucosyl-1,2 dianteisopentadecanoylglycerol = 1 UDP + 1 Diglucosyl-1,2 dianteisopentadecanoylglycerol	0	0	0	0	0	0	0	0	0	0	0	0	0	0	0	0	0	0
R_rxn05733_c0	1 H2S2O3 + 1 trdrd + 1 O-Acetyl-L-serine = 1 trdox + 1 L-Cysteine + 1 Sulfite + 1 Acetate	0	0	0	0	0	0	0	0	0	0	0	0	0	0	0	0	0	0
R_rxn05350_c0	1 H+ + 1 Hexanoyl-ACP + 1 Malonyl-acyl-carrierprotein- = 1 ACP + 1 CO2 + 1 3-oxooctanoyl-acp	0	0	0	0	0	0	0	0	0	0	0	0	0	0	0	0	0	0
R_rxn00720_c0	1 NADP + 1 Hydrouracil = 1 Uracil + 1 H+ + 1 NADPH	-0.00755977	-0.00682458	-0.00409034	-0.00851286	-0.00752102	-0.00301377	-0.00409706	-0.00487544	-0.000893111	-0.000492597	-0.000446555	-0.000775125	-0.00025451	-0.00120352	-0.000778369	-0.000928728	-0.000928728	-8.93111e-05
R_rxn10255_c0	1 ATP + 1 1,2-Diisotetradecanoyl-sn-glycerol = 1 1,2-diisotetradecanoyl-sn-glycerol 3-phosphate + 1 ADP	0	0	0	0	0	0	0	0	0	0	0	0	0	0	0	0	0	0
R_rxn10114_c0	3.0 H+ + 1 Ubiquinone-8 + 1 Formate = 2.0 H+ + 1 Ubiquinol-8 + 1 CO2	0	0	0	0	0	0	0	0	0	0	0	0	0	0	0	0	0	0
R_rxn02569_c0	1 ATP + 1 H2O + 1 Selenide = 2.0 H+ + 1 AMP + 1 Phosphate + 1 Selenophosphate	0	0	0	0	0	0	0	0	0	0	0	0	0	0	0	0	0	0
R_rxn00710_c0	1 H+ + 1 Orotidylic acid = 1 UMP + 1 CO2	0.0462278	0.0417321	0.0250123	0.0520559	0.0459908	0.0184291	0.0250534	0.0298132	0.00546135	0.00301222	0.00273067	0.00473987	0.00155632	0.00735947	0.0047597	0.00567915	0.00567915	0.000546135
R_rxn05539_c0	1 ATP + 1 H2O + 1 Cys-Gly = 1 H+ + 1 Phosphate + 1 ADP + 1 Cys-Gly	0	0	0	0	0	0	0	0	0	0	0	0	0	0	0	0	0	0
R_rxn02775_c0	1 H+ + 1 Precorrin 2 + 1 S-Adenosyl-L-methionine = 1 S-Adenosyl-homocysteine + 1 Precorrin 3A	0	0	0	0	0	0	0	0	0	0	0	0	0	0	0	0	0	0
R_rxn10280_c0	1 UDP-glucose + 1 1,2-Diacyl-sn-glycerol dihexadecanoyl = 1 UDP + 1 Monoglucosyl-1,2 dipalmitoylglycerol	0	0	0	0	0	0	0	0	0	0	0	0	0	0	0	0	0	0
R_rxn00717_c0	1 Cytosine + 1 H+ + 1 H2O = 1 Uracil + 1 NH3	0	0	0	0	0	0	0	0	0	0	0	0	0	0	0	0	0	0
R_rxn01642_c0	1 H2O + 1 4-Imidazolone-5-propanoate = 1 N-Formimino-L-glutamate	0	0	0	0	0	0	0	0	0	0	0	0	0	0	0	0	0	0
R_rxn00545_c0	1 ATP + 1 D-fructose-6-phosphate = 1 ADP + 1 D-fructose-1,6-bisphosphate	0	9.59506	9.7573	0	0	9.82118	0	0	0	0	0	0	0	0	0	0	0	0
R_rxn10308_c0	1 Myristoyllipoteichoic acid (n-24), linked, unsubstituted + 24.0 UDP-N-acetylglucosamine = 24.0 UDP + 1 Myristoyllipoteichoic acid (n-24), linked, N-acetyl-D-glucosamine	0	0	0	0	0	0	0	0	0	0	0	0	0	0	0	0	0	0
R_rxn05249_c0	1 H+ + 1 ATP + 1 CoA + 1 fa3 = 1 AMP + 1 PPi + 1 fa3coa	0	0	0	0	0	0	0	0	0	0	0	0	0	0	0	0	0	0
R_rxn02897_c0	1 Dimethylbenzimidazole + 1 Nicotinate ribonucleotide = 1 H+ + 1 Niacin + 1 alpha-Ribazole 5'-phosphate	0.00377988	0.00341229	0.00204517	0.00425643	0.00376051	0.00150688	0.00204853	0.00243772	0.000446555	0.000246298	0.000223278	0.000387562	0.000127255	0.000601758	0.000389184	0.000464364	0.000464364	4.46555e-05
R_rxn01649_c0	1 H+ + 1 Xanthosine + 1 Phosphate = 1 Ribose 1-phosphate + 1 XAN	0	0	0	0	0	0	0	0	0	0	0	0	0	0	0	0	0	0
R_rxn01301_c0	1 NAD + 1 L-Homoserine = 1 H+ + 1 L-Aspartate4-semialdehyde + 1 NADH	-1.02265	-0.923199	-0.553323	-1.15158	-1.01741	-0.407689	-0.554232	-0.659527	1.16818	-0.0666363	-0.060408	-0.104855	-0.034429	-0.162806	-0.105294	-0.125634	-0.125634	1.36682
R_rxn05396_c0	1 9-methyl-decanoyl-ACP + 1 H+ + 1 Malonyl-acyl-carrierprotein- = 1 ACP + 1 CO2 + 1 11-methyl-3-oxo-dodecanoyl-ACP	0.0395836	0.0357341	0.0214174	0.0445741	0.0393807	0.0157803	0.0214526	0.0255282	0.00467641	0.00257928	0.0023382	0.00405862	0.00133264	0.00630171	0.00407561	0.0048629	0.0048629	0.000467641
R_rxn04046_c0	1 S-Adenosyl-L-methionine + 1 Cobalt-precorrin 2 = 1 H+ + 1 Cobalt-precorrin 3 + 1 S-Adenosyl-homocysteine	0	0	0	0	0	0	0	0	0	0	0	0	0	0	0	0	0	0
R_rxn13782_c0	1 Protein biosynthesis = 1 Protein biosynthesis	0	0	0	0	0	0	0	0	0	0	0	0	0	0	0	0	0	0
R_rxn10334_c0	2.0 Phosphatidylglycerol dihexadecanoyl = 1 Palmitoylcardiolipin (B. subtilis) + 1 Glycerol	0	0	0	0	0	0	0	0	0	0	0	0	0	0	0	0	0	0
R_rxn00910_c0	1 Reducedferredoxin + 2.0 NAD + 1 5-Methyltetrahydrofolate = 1 Oxidizedferredoxin + 1 5-10-Methylenetetrahydrofolate + 2.0 NADH	-6.40042	-0.0658405	-0.0394618	-0.0821283	-5.54756	-1.43281	-8.04918	-7.67856	-4.66803	-2.26545	-4.83402	-4.71189	-0.203829	-4.55266	-4.71068	-4.65479	-4.65479	-4.9668
R_rxn02286_c0	1 UDP-MurNAc + 1 ATP + 1 L-Alanine = 1 UDP-N-acetylmuramoyl-L-alanine + 1 H+ + 1 Phosphate + 1 ADP	0.000859822	0.000776204	0.000465221	0.000968223	0.000855415	0.000342775	0.000465986	0.000554515	0.000101579	5.60262e-05	5.07896e-05	8.816e-05	2.89471e-05	0.000136884	8.85289e-05	0.00010563	0.00010563	1.01579e-05
R_rxn05363_c0	1 H+ + 1 Malonyl-acyl-carrierprotein- + 1 4-methyl-hexanoyl-ACP = 1 ACP + 1 CO2 + 1 6-methyl-3-oxo-octanoyl-ACP	0.0395836	0.0357341	0.0214174	0.0445741	0.0393807	0.0157803	0.0214526	0.0255282	0.00467641	0.00257928	0.0023382	0.00405862	0.00133264	0.00630171	0.00407561	0.0048629	0.0048629	0.000467641
R_rxn01682_c0	1 Indoleglycerol phosphate = 1 Glyceraldehyde3-phosphate + 1 indol	0.025944	0.023421	0.0140375	0.0292149	0.0258111	0	0	0	0.00306503	0.00169052	0.00153251	0.00266012	0.000873442	0.00413029	0.00267125	0	0	0.000306503
R_rxn02474_c0	1 5-Amino-6--5-phosphoribitylaminouracil + 1 NADP = 1 H+ + 1 5-Amino-6--5-phosphoribosylaminouracil + 1 NADPH	-0.00755977	-0.00682458	-0.00409034	-0.00851286	-0.00752102	-0.00301377	-0.00409706	-0.00487544	-0.000893111	-0.000492597	-0.000446555	-0.000775125	-0.00025451	-0.00120352	-0.000778369	-0.000928728	-0.000928728	-8.93111e-05
R_rxn01292_c0	1 L-Arabinose = 1 L-Ribulose	0	0	0	0	0	0	0	0	0	0	0	0	0	0	0	0	0	0
R_rxn10302_c0	24.0 UDP-glucose + 1 Anteisoheptadecanoyllipoteichoic acid (n-24), linked, unsubstituted = 1 Anteisoheptadecanoyllipoteichoic acid (n-24), linked, glucose substituted + 24.0 UDP	0.000859822	0.000776204	0.000465221	0.000968223	0.000855415	0.000342775	0.000465986	0.000554515	0.000101579	5.60262e-05	5.07896e-05	8.816e-05	2.89471e-05	0.000136884	8.85289e-05	0.00010563	0.00010563	1.01579e-05
R_rxn10311_c0	24.0 UDP-N-acetylglucosamine + 1 Anteisoheptadecanoyllipoteichoic acid (n-24), linked, unsubstituted = 24.0 UDP + 1 Anteisoheptadecanoyllipoteichoic acid (n-24), linked, N-acetyl-D-glucosamine	0.000859822	0.000776204	0.000465221	0.000968223	0.000855415	0.000342775	0.000465986	0.000554515	0.000101579	5.60262e-05	5.07896e-05	8.816e-05	2.89471e-05	0.000136884	8.85289e-05	0.00010563	0.00010563	1.01579e-05
R_rxn01486_c0	1 Isopentenyldiphosphate + 1 Farnesyldiphosphate = 1 Geranylgeranyl diphosphate + 1 PPi	0.00755977	0.00682458	0.00409034	0.00851286	0.00752102	0.00301377	0.00409706	0.00487544	0.000893111	0.000492597	0.000446555	0.000775125	0.00025451	0.00120352	0.000778369	0.000928728	0.000928728	8.93111e-05
R_rxn05359_c0	1 H+ + 1 2-methylbutyryl-ACP + 1 Malonyl-acyl-carrierprotein- = 1 4-methyl-3-oxo-hexanoyl-ACP + 1 ACP + 1 CO2	0.0395836	0.0357341	0.0214174	0.0445741	0.0393807	0.0157803	0.0214526	0.0255282	0.00467641	0.00257928	0.0023382	0.00405862	0.00133264	0.00630171	0.00407561	0.0048629	0.0048629	0.000467641
R_rxn00898_c0	1 2,3-Dihydroxy-isovalerate = 1 3-Methyl-2-oxobutanoate + 1 H2O	0.359057	0.324139	0.194274	0.404325	0.357217	0.143141	0.194593	0.231563	0.042419	0.0233963	0.0212095	0.0368152	0.0120882	0.0571619	0.0369692	0.0441107	0.0441107	0.0042419
R_rxn10203_c0	1 Myristoyl-CoA + 1 Glycerol-3-phosphate = 1 1-tetradecanoyl-sn-glycerol 3-phosphate + 1 CoA	0	0	0	0	0	0	0	0	0	0	0	0	0	0	0	0	0	0
R_rxn01069_c0	1 H2O + 1 O-Phospho-L-homoserine = 1 L-Threonine + 1 H+ + 1 Phosphate	0.918824	0.829469	0.497145	1.03466	0.914115	0.366297	0.497962	0.592567	0.10855	0.0598708	0.0542749	0.0942096	0.0309335	0.146277	0.0946039	0.112879	0.112879	0.010855
R_rxn02113_c0	1 H+ + 1 ALCTT = 1 CO2 + 1 ACTN	0	0	1.47558	0	0	9.50959	0	0	0	0	0	0	0	0	0	0	0	2
R_rxn01997_c0	1 dTDPglucose = 1 dTDP-4-oxo-6-deoxy-D-glucose + 1 H2O	0	0	0	0	0	0	0	0	0	0	0	0	0	0	0	0	0	0
R_rxn00555_c0	1 D-fructose-6-phosphate + 1 L-Glutamine = 1 L-Glutamate + 1 D-Glucosamine phosphate	0.0945804	0.0853825	0.0511743	0.106505	0.0940956	0.0377053	0.0512584	0.0609967	0.0111737	0.00616289	0.00558686	0.0096976	0.00318418	0.0150572	0.00973818	0.0116193	0.0116193	0.00111737
R_rxn05541_c0	1 ATP + 1 H2O + 1 ala-L-glu-L = 1 H+ + 1 Phosphate + 1 ADP + 1 ala-L-glu-L	0	0	0	0	0	0	0	0	0	0	0	0	0	0	0	0	0	0
R_rxn08298_c0	1 ATP + 1 1,2-Diacyl-sn-glycerol dihexadec-9-enoyl = 1 ADP + 1 1,2-dihexadec-9-enoyl-sn-glycerol 3-phosphate	0	0	0	0	0	0	0	0	0	0	0	0	0	0	0	0	0	0
R_rxn00260_c0	1 L-Aspartate + 1 2-Oxoglutarate = 1 Oxaloacetate + 1 L-Glutamate	-1.6401	-1.4806	-0.887405	-1.84688	-1.6317	-0.653841	-0.888863	-3.86232	-0.193762	-0.10687	-0.0968808	-0.168164	-0.0552163	-0.261104	-0.168868	-1.44219	-1.24279	-0.0193762
R_rxn05219_c0	1 L-Methionine + 1 ATP + 1 H2O = 1 H+ + 1 L-Methionine + 1 Phosphate + 1 ADP	0	0	0	0	0	0	0	0	0	0	0	0	0	0	0	0	0	0
R_rxn02484_c0	1 ATP + 1 Toxopyrimidine = 1 4-Amino-5-phosphomethyl-2-methylpyrimidine + 1 ADP	0	0	0	0	0	0	0	0	0	0	0	0	0	0	0	0	0	0
R_rxn05337_c0	1 NADP + 1 D-3-Hydroxyhexanoyl-[acp] = 1 H+ + 1 3-Oxohexanoyl-[acp] + 1 NADPH	0	0	0	0	0	0	0	0	0	0	0	0	0	0	0	0	0	0
R_rxn03137_c0	1 10-Formyltetrahydrofolate + 1 AICAR = 1 Tetrahydrofolate + 1 FAICAR	0.129948	0.11731	0.0703103	0.146331	0.129281	0.0518047	0.0704259	0.0838056	0.015352	0.00846742	0.007676	0.0133239	0.00437486	0.0206877	0.0133797	0.0159642	0.0159642	0.0015352
R_rxn00690_c0	1 ATP + 1 Tetrahydrofolate + 1 Formate = 1 10-Formyltetrahydrofolate + 1 Phosphate + 1 ADP	6.82645	0.45044	0.269973	0.561871	5.97141	1.60265	8.28007	7.95331	4.71836	2.29321	4.85918	4.75557	0.218172	4.62048	4.75455	4.70713	4.70713	4.97184
R_rxn01114_c0	1 ATP + 1 D-Ribulose = 1 D-Ribulose5-phosphate + 1 ADP	0	0	0	0	0	0	0	0	0	0	0	0	0	0	0	0	0	0
R_rxn05367_c0	1 H+ + 1 6-methyl-octanoyl-ACP + 1 Malonyl-acyl-carrierprotein- = 1 ACP + 1 CO2 + 1 8-methyl-3-oxo-decanoyl-ACP	0.0395836	0.0357341	0.0214174	0.0445741	0.0393807	0.0157803	0.0214526	0.0255282	0.00467641	0.00257928	0.0023382	0.00405862	0.00133264	0.00630171	0.00407561	0.0048629	0.0048629	0.000467641
R_rxn00527_c0	1 2-Oxoglutarate + 1 L-Tyrosine = 1 p-hydroxyphenylpyruvate + 1 L-Glutamate	-0.0566433	-0.0511348	-0.0306478	-0.0637846	-0.056353	-0.0225813	-0.0306982	-0.0365304	-0.00669184	-0.0036909	-0.00334592	-0.0058078	-0.00190697	-0.00901762	-0.00583211	-0.00695871	-0.00695871	-0.000669184
R_rxn05171_c0	1 ATP + 1 H2O + 1 Nitrate = 1 H+ + 1 Phosphate + 1 Nitrate + 1 ADP	0	0	0	0	0	0	0	0	0	0	0	0	0	0	0	0	0	0
R_rxn04052_c0	1 Cobalt-precorrin 8 = 1 Cobyrinate	0	0	0	0	0	0	0	0	0	0	0	0	0	0	0	0	0	0
R_rxn08549_c0	1 Glycerol-3-phosphate + 1 Palmitoyl-ACP = 1 ACP + 1 1-hexadecanoyl-sn-glycerol 3-phosphate	0	0	0	0	0	0	0	0	0	0	0	0	0	0	0	0	0	0
R_rxn13783_c0	1 DNA replication = 1 DNA replication	0	0	0	0	0	0	0	0	0	0	0	0	0	0	0	0	0	0
R_rxn04045_c0	2.0 H+ + 1 Co2+ + 1 Sirohydrochlorin = 1 Cobalt-precorrin 2	0	0	0	0	0	0	0	0	0	0	0	0	0	0	0	0	0	0
R_rxn01390_c0	1 ATP + 1 L-Lyxulose = 1 ADP + 1 L-Xylulose 1-phosphate	0	0	0	0	0	0	0	0	0	0	0	0	0	0	0	0	0	0
R_rxn09111_c0	1 Glycerol-3-phosphate + 1 CDP-1,2-dihexadecanoylglycerol = 1 Phosphatidylglycerophosphate dihexadecanoyl + 1 CMP	0	0	0	0	0	0	0	0	0	0	0	0	0	0	0	0	0	0
R_rxn01974_c0	1 LL-2,6-Diaminopimelate = 1 meso-2,6-Diaminopimelate	0.154964	0.139893	0.0838457	0.174501	0.154169	0.0617775	0.0839835	0.099939	0.0183074	0.0100975	0.00915369	0.0158889	0.00521706	0.0246702	0.0159554	0.0190375	0.0190375	0.00183074
R_rxn12645_c0	1 gly-asn-L + 1 H2O = 1 L-Asparagine + 1 Glycine	0	0	0	0	0	0	0	0	0	0	0	0	0	0	0	0	0	0
R_rxn02008_c0	1 UDP-N-acetylmuramoyl-L-alanine + 1 D-Glutamate + 1 ATP = 1 H+ + 1 Phosphate + 1 UDP-N-acetylmuramoyl-L-alanyl-D-glutamate + 1 ADP	0.000859822	0.000776204	0.000465221	0.000968223	0.000855415	0.000342775	0.000465986	0.000554515	0.000101579	5.60262e-05	5.07896e-05	8.816e-05	2.89471e-05	0.000136884	8.85289e-05	0.00010563	0.00010563	1.01579e-05
R_rxn05385_c0	1 5-methyl-3-oxo-hexanoyl-ACP + 1 H+ + 1 NADPH = 1 NADP + 1 5-methyl-3-hydroxy-hexanoyl-ACP	0.0395836	0.0357341	0.0214174	0.0445741	0.0393807	0.0157803	0.0214526	0.0255282	0.00467641	0.00257928	0.0023382	0.00405862	0.00133264	0.00630171	0.00407561	0.0048629	0.0048629	0.000467641
R_rxn02155_c0	1 ATP + 1 Nicotinate ribonucleotide = 1 PPi + 1 Deamido-NAD	0.00755977	0.00682458	0.00409034	0.00851286	0.00752102	0.00301377	0.00409706	0.00487544	0.000893111	0.000492597	0.000446555	0.000775125	0.00025451	0.00120352	0.000778369	0.000928728	0.000928728	8.93111e-05
R_rxn00915_c0	1 Guanine + 1 PRPP = 1 GMP + 1 PPi	0	0	0	0	0	0	0	0	0	0	0	0	0	0	0	0	0	0
R_rxn00299_c0	1 H2O + 1 GTP = 1 H+ + 1 7,8-Dihydroneopterin 3'-triphosphate + 1 Formate	0.0113397	0	0.00613551	0	0	0	0	0	0	0	0.000669833	0.00116269	0.000381765	0.00180527	0	0	0	0
R_rxn00461_c0	1 Phosphoenolpyruvate + 1 UDP-N-acetylglucosamine = 1 UDP-N-acetylglucosamine enolpyruvate + 1 H+ + 1 Phosphate	0.000859822	0.000776204	0.000465221	0.000968223	0.000855415	0.000342775	0.000465986	0.000554515	0.000101579	5.60262e-05	5.07896e-05	8.816e-05	2.89471e-05	0.000136884	8.85289e-05	0.00010563	0.00010563	1.01579e-05
R_rxn00748_c0	1 Glycerone-phosphate = 1 H+ + 1 Phosphate + 1 2-Oxopropanal	0	0	0	0	0	0	0	0	0	0	0	0	0	0	0	0	0	0
R_rxn06799_c0	1 S-Adenosyl-L-methionine + 1 DNA cytosine = 1 H+ + 1 S-Adenosyl-homocysteine + 1 DNA 5-methylcytosine	0	0	0	0	0	0	0	0	0	0	0	0	0	0	0	0	0	0
R_rxn08089_c0	1 1-octadec-11-enoyl-sn-glycerol 3-phosphate + 1 Octadecenoyl-ACP = 1 ACP + 1 1,2-dioctadec-11-enoyl-sn-glycerol 3-phosphate	0	0	0	0	0	0	0	0	0	0	0	0	0	0	0	0	0	0
R_rxn00283_c0	1 L-Alanine = 1 D-Alanine	0.102319	0.0923683	0.0553613	0.115219	0.101794	0.0407903	0.0554523	0.0659873	0.0120879	0.00666712	0.00604397	0.010491	0.0034447	0.0162892	0.0105349	0.01257	0.01257	0.00120879
R_rxn10212_c0	1 1-tetradecanoyl-sn-glycerol 3-phosphate + 1 Myristoyl-CoA = 1 1,2-ditetradecanoyl-sn-glycerol 3-phosphate + 1 CoA	0	0	0	0	0	0	0	0	0	0	0	0	0	0	0	0	0	0
R_rxn00953_c0	1 Homocysteine + 1 L-Serine = 1 H2O + 1 Cystathionine	0.042234	0.0381268	0.0228514	0.0475586	0.0420175	0.0168369	0.022889	0.0272375	0.00498952	0.00275198	0.00249476	0.00433037	0.00142187	0.00672366	0.0043485	0.0051885	0.0051885	0.000498952
R_rxn10337_c0	2.0 Diisoheptadecanoylphosphatidylglycerol = 1 Isoheptadecanoylcardiolipin (B. subtilis) + 1 Glycerol	0.00408813	0.00369056	0.00221195	0.00460354	0.00406718	0.00162977	0.00221559	0.00263651	0.000482971	0.000266384	0.000241486	0.000419168	0.000137633	0.000650831	0.000420922	0.000502232	0.000502232	4.82971e-05
R_rxn10235_c0	2.0 H+ + 1 Diisopentadecanoylphosphatidylserine = 1 Diisopentadecanoylphosphatidylethanolamine + 1 CO2	0	0	0	0	0	0	0	0	0	0	0	0	0	0	0	0	0	0
R_rxn10273_c0	1 UDP-glucose + 1 Monoglucosyl-1,2 distearoylglycerol = 1 UDP + 1 Diglucosyl-1,2 distearoylglycerol	0.00343929	0.00310482	0.00186088	0.00387289	0.00342166	0.0013711	0.00186394	0.00221806	0.000406317	0.000224105	0.000203159	0.00035264	0.000115788	0.000547535	0.000354116	0.000422521	0.000422521	4.06317e-05
R_rxn05417_c0	1 H+ + 1 Malonyl-acyl-carrierprotein- + 1 6-methyl-heptanoyl-ACP = 1 8-methyl-3-oxo-nonanoyl-ACP + 1 ACP + 1 CO2	0	0	0	0	0	0	0	0	0	0	0	0	0	0	0	0	0	0
R_rxn00938_c0	1 Nicotinamide + 1 H2O = 1 NH3 + 1 Niacin	0	0	0	0	0	0	0	0	0	0	0	0	0	0	0	0	0	0
R_rxn10305_c0	1 Anteisopentadecanoyllipoteichoic acid (n-24), linked, unsubstituted + 24.0 UDP-glucose = 24.0 UDP + 1 Anteisopentadecanoyllipoteichoic acid (n-24), linked, glucose substituted	0	0	0	0	0	0	0	0	0	0	0	0	0	0	0	0	0	0
R_rxn10221_c0	1 1,2-dianteisoheptadecanoyl-sn-glycerol 3-phosphate + 1 CTP = 1 CDP-1,2-dianteisoheptadecanoylglycerol + 1 PPi	0.0163525	0.0147622	0.00884781	0.0184142	0.0162687	0.00651907	0.00886235	0.0105461	0.00193189	0.00106554	0.000965943	0.00167667	0.00055053	0.00260332	0.00168369	0.00200893	0.00200893	0.000193189
R_rxn09177_c0	1 L-Cysteine + 1 4-phosphopantothenate + 1 CTP = 1 PPi + 1 (R)-4'-Phosphopantothenoyl-L-cysteine + 1 CMP	0.00755977	0.00682458	0.00409034	0.00851286	0.00752102	0.00301377	0.00409706	0.00487544	0.000893111	0.000492597	0.000446555	0.000775125	0.00025451	0.00120352	0.000778369	0.000928728	0.000928728	8.93111e-05
R_rxn03437_c0	1 2,3-Dihydroxy-3-methylvalerate = 1 3MOP + 1 H2O	0.168329	0.151959	0.091077	0.18955	0.167466	0.0671056	0.0912267	0.108558	0.0198863	0.0109683	0.00994316	0.0172592	0.00566701	0.0267979	0.0173314	0.0206794	0.0206794	0.00198863
R_rxn09199_c0	2.0 H+ + 1 phosphatidylserine ditetradec-7-enoyl = 1 phosphatidylethanolamine ditetradec-7-enoyl + 1 CO2	0	0	0	0	0	0	0	0	0	0	0	0	0	0	0	0	0	0
R_rxn02320_c0	1 L-histidinol-phosphate + 1 2-Oxoglutarate = 1 imidazole acetol-phosphate + 1 L-Glutamate	-0.0390136	-0.0352196	-0.021109	-0.0439322	-0.0388137	-0.0155531	-0.0211437	-0.0251606	-0.00460907	-0.00254214	-0.00230453	-0.00400018	-0.00131345	-0.00621097	-0.00401692	-0.00479287	-0.00479287	-0.000460907
R_rxn01648_c0	1 Cytidine + 1 H+ + 1 Phosphate = 1 Ribose 1-phosphate + 1 Cytosine	0	0	0	0	0	0	0	0	0	0	0	0	0	0	0	0	0	0
R_rxn10126_c0	1 Ubiquinone-8 + 1 FADH2 = 1 FAD + 1 Ubiquinol-8	0	0	999.975	0	999.954	0	999.975	999.97	0	0	1000	1000	999.998	999.993	0	1000	1000	0
R_rxn08083_c0	1 1-dodecanoyl-sn-glycerol 3-phosphate + 1 Dodecanoyl-ACP = 1 1,2-didodecanoyl-sn-glycerol 3-phosphate + 1 ACP	0	0	0	0	0	0	0	0	0	0	0	0	0	0	0	0	0	0
R_rxn02507_c0	1 H+ + 1 1-(2-carboxyphenylamino)-1-deoxyribulose 5-phosphate = 1 Indoleglycerol phosphate + 1 H2O + 1 CO2	0.025944	0.023421	0.0140375	0.0292149	0.0258111	0.0103428	0.0140605	0.0167318	0.00306503	0.00169052	0.00153251	0.00266012	0.000873442	0.00413029	0.00267125	0.00318726	0.00318726	0.000306503
R_rxn03901_c0	1 Bactoprenyl diphosphate + 1 H2O = 1 H+ + 1 Phosphate + 1 Undecaprenylphosphate	0.000859822	0.000776204	0.000465221	0.000968223	0.000855415	0.000342775	0.000465986	0.000554515	0.000101579	5.60262e-05	5.07896e-05	8.816e-05	2.89471e-05	0.000136884	8.85289e-05	0.00010563	0.00010563	1.01579e-05
R_rxn03933_c0	1 MurAc(oyl-L-Ala-D-gamma-Glu-L-Lys-D-Ala-D-Ala)-diphospho- undecaprenol + 1 UDP-N-acetylglucosamine = 1 UDP + 1 Undecaprenyl-diphospho-N-acetylmuramoyl-(N-acetylglucosamine)-L-alanyl-gamma-D-glutamyl-L-lysyl-D-alanyl-D-alanine	0	0	0	0	0	0	0	0	0	0	0	0	0	0	0	0	0	0
R_rxn05202_c0	1 H+ + 1 XAN = 1 H+ + 1 XAN	0	0	0	0	0	0	0	0	0	0	0	0	0	0	0	0	0	0
R_rxn05226_c0	1 D-Glucose + 1 Phosphoenolpyruvate = 1 Pyruvate + 1 D-glucose-6-phosphate	0	0	0	0	0	0	0	0	0	0	0	0	0	0	0	0	0	0
R_rxn05537_c0	1 gly-asp-L + 1 ATP + 1 H2O = 1 H+ + 1 gly-asp-L + 1 Phosphate + 1 ADP	0	0	0	0	0	0	0	0	0	0	0	0	0	0	0	0	0	0
R_rxn10209_c0	1 Glycerol-3-phosphate + 1 fa4coa = 1 CoA + 1 1-anteisopentadecanoyl-sn-glycerol 3-phosphate	0	0	0	0	0	0	0	0	0	0	0	0	0	0	0	0	0	0
R_rxn01333_c0	1 Sedoheptulose7-phosphate + 1 Glyceraldehyde3-phosphate = 1 D-Erythrose4-phosphate + 1 D-fructose-6-phosphate	-9.56836	-0.0152782	-0.00915707	-9.51395	-9.57058	-0.00674693	-9.76607	-0.0109147	-0.00199941	-0.00110278	-0.000999705	-0.00173527	-0.000569773	-0.00269432	-0.00174254	-0.00207915	-0.00207915	-0.000199941
R_rxn01626_c0	1 H2O + 1 Hydrouracil = 1 H+ + 1 3-Ureidopropanoate	0.00755977	0.00682458	0.00409034	0.00851286	0.00752102	0.00301377	0.00409706	0.00487544	0.000893111	0.000492597	0.000446555	0.000775125	0.00025451	0.00120352	0.000778369	0.000928728	0.000928728	8.93111e-05
R_rxn05560_c0	1 Phosphoenolpyruvate + 1 D-Fructose = 1 D-fructose-1-phosphate + 1 Pyruvate	-0.0122644	-0.0110717	-0.00663586	-0.0138106	-0.0122015	-0.0048893	-0.00664676	9.70281	-0.00144891	-0.000799152	-0.000724457	-0.0012575	-0.000412898	-0.00195249	-0.00126277	-0.0015067	-0.0015067	-0.000144891
R_cpd00082_ext_b	1 D-Fructose = 1 D-Fructose	-10	-10	-10	-10	-10	-10	-10	-10	0	0	0	0	0	0	0	0	0	0
R_rxn02161_c0	1 ATP + 1 L-Rhamnulose = 1 L-Rhamnulose 1-phosphate + 1 ADP	0	0	0	0	0	0	0	0	0	0	0	0	0	0	0	0	0	0
R_rxn00714_c0	1 H2O + 1 UppppU = 1 UMP + 1 UTP	0	0	0	0	0	0	0	0	0	0	0	0	0	0	0	0	0	0
R_rxn00303_c0	1 ATP + 1 GTP = 1 AMP + 1 Guanosine 5'-triphosphate,3'-diphosphate	0	0	0	0	0	0	0	0	0	0	0	0	0	0	0	0	0	0
R_rxn00693_c0	1 5-Methyltetrahydrofolate + 1 Homocysteine = 1 L-Methionine + 1 Tetrahydrofolate	0.0691534	0.0624282	0.0374166	0.0778719	0.0687989	0.0275686	0.0374781	0.0445983	0.00816978	0.00450606	0.00408489	0.00709049	0.00232814	0.0110092	0.00712017	0.00849559	0.00849559	0.000816978
R_rxn00122_c0	1 ATP + 1 FMN = 1 FAD + 1 PPi	0.00377988	0.00341229	0.00204517	0.00425643	0.00376051	0.00150688	0.00204853	0.00243772	0.000446555	0.000246298	0.000223278	0.000387562	0.000127255	0.000601758	0.000389184	0.000464364	0.000464364	4.46555e-05
R_rxn01116_c0	1 D-Ribulose5-phosphate = 1 D-Xylulose5-phosphate	-0.219214	-0.197896	-0.11861	-0.246852	-0.218091	-0.0873916	-0.118804	-0.141375	-0.025898	-0.0142841	-0.012949	-0.0224767	-0.00738015	-0.0348989	-0.0225707	-0.0269308	-0.0269308	-0.0025898
R_rxn00470_c0	1 H+ + 1 Ornithine = 1 Putrescine + 1 CO2	0.00755977	0.00682458	0.00409034	0.00851286	0.00752102	0.00301377	0.00409706	0.00487544	0.000893111	0.000492597	0.000446555	0.000775125	0.00025451	0.00120352	0.000778369	0.000928728	0.000928728	8.93111e-05
R_rxn05585_c0	1 ATP + 1 H2O + 1 hexanesulfonate = 1 H+ + 1 Phosphate + 1 hexanesulfonate + 1 ADP	0	0	0	0	0	0	0	0	0	0	0	0	0	0	0	0	0	0
R_rxn03908_c0	1 4--cytidine5-diphospho-2-C-methyl-D-erythritol + 1 ATP = 1 2-phospho-4--cytidine5-diphospho-2-C-methyl-D-erythritol + 1 ADP	0.0699362	0.0631349	0.0378402	0.0787534	0.0695777	0.0278807	0.0379023	0.0451032	0.00826226	0.00455706	0.00413113	0.00717076	0.0023545	0.0111338	0.00720077	0.00859176	0.00859176	0.000826226
R_rxn08551_c0	1 Octadecanoyl-ACP + 1 Glycerol-3-phosphate = 1 1-octadecanoyl-sn-glycerol 3-phosphate + 1 ACP	0	0	0	0	0	0	0	0	0	0	0	0	0	0	0	0	0	0
R_rxn08308_c0	1 1,2-ditetradec-7-enoyl-sn-glycerol 3-phosphate + 1 CTP = 1 PPi + 1 CDP-1,2-ditetradec-7-enoylglycerol	0	0	0	0	0	0	0	0	0	0	0	0	0	0	0	0	0	0
R_rxn01986_c0	1 deoxyribose-1-phosphate = 1 deoxyribose-5-phosphate	0.00755977	0.00682458	0.00409034	0.00851286	0.00752102	0.00301377	0.00409706	0.00487544	0.000893111	0.000492597	0.000446555	0.000775125	0.00025451	0.00120352	0.000778369	0.000928728	0.000928728	8.93111e-05
R_rxn05207_c0	1 L-Malate + 1 Na+ = 1 L-Malate + 1 Na+	1000	1000	1000	1000	1000	1000	1000	1000	1000	1000	1000	1000	1000	1000	1000	1000	1000	1000
R_rxn02213_c0	1 5-Dehydroquinate = 1 H2O + 1 3-Dehydroshikimate	0.185366	0.167339	0.100295	0.208736	0.184416	0.0738978	0.10046	0.119546	0.0218991	0.0120785	0.0109496	0.0190061	0.0062406	0.0295103	0.0190857	0.0227725	0.0227725	0.00218991
R_rxn02200_c0	1 6-hydroxymethyl dihydropterin + 1 ABEE = 1 Dihydropteroate + 1 H2O	0.0113397	0.0102369	0.00613551	0.0127693	0.0112815	0.00452065	0.00614559	0.00731316	0.00133967	0.000738895	0.000669833	0.00116269	0.000381765	0.00180527	0.00116755	0.00139309	0.00139309	0.000133967
R_rxn05397_c0	1 H+ + 1 11-methyl-3-oxo-dodecanoyl-ACP + 1 NADPH = 1 11-methyl-3-hydroxy-dodecanoyl-ACP + 1 NADP	0.0395836	0.0357341	0.0214174	0.0445741	0.0393807	0.0157803	0.0214526	0.0255282	0.00467641	0.00257928	0.0023382	0.00405862	0.00133264	0.00630171	0.00407561	0.0048629	0.0048629	0.000467641
R_rxn04308_c0	7.0 Isopentenyldiphosphate + 1 trans,trans,cis-Geranylgeranyl diphosphate = 1 Bactoprenyl diphosphate + 7.0 PPi	0.000859822	0.000776204	0.000465221	0.000968223	0.000855415	0.000342775	0.000465986	0.000554515	0.000101579	5.60262e-05	5.07896e-05	8.816e-05	2.89471e-05	0.000136884	8.85289e-05	0.00010563	0.00010563	1.01579e-05
R_rxn03062_c0	1 NAD + 1 3-Isopropylmalate = 1 2-isopropyl-3-oxosuccinate + 1 H+ + 1 NADH	0.205001	0.185065	0.110919	0.230847	0.203951	0.0817255	0.111102	0.132209	0.0242188	0.0133579	0.0121094	0.0210194	0.00690165	0.0326362	0.0211073	0.0251847	0.0251847	0.00242188
R_rxn01171_c0	1 D-Glucose = 1 beta-D-Glucose	0	0	0	0	0	0	0	0	0	0	0	0	0	0	0	0	0	0
R_rxn01388_c0	1 Isocitrate = 1 cis-Aconitate + 1 H2O	999.521	998.952	999.741	999.461	999.524	999.809	999.741	999.691	-1000	-1000	999.972	-1000	-1000	-1000	-1000	999.941	999.941	-1000
R_rxn05421_c0	1 8-methyl-nonanoyl-ACP + 1 H+ + 1 Malonyl-acyl-carrierprotein- = 1 ACP + 1 10-methyl-3-oxo-undecanoyl-ACP + 1 CO2	0	0	0	0	0	0	0	0	0	0	0	0	0	0	0	0	0	0
R_rxn10214_c0	1 fa11coa + 1 1-isoheptadecanoyl-sn-glycerol 3-phosphate = 1 1,2-diisoheptadecanoyl-sn-glycerol 3-phosphate + 1 CoA	0.0197918	0.0178671	0.0107087	0.022287	0.0196904	0.00789017	0.0107263	0.0127641	0.0023382	0.00128964	0.0011691	0.00202931	0.000666318	0.00315086	0.0020378	0.00243145	0.00243145	0.00023382
R_rxn03446_c0	1 H2O + 1 4-(Phosphonooxy)-threonine = 1 4-Hydroxy-L-threonine + 1 H+ + 1 Phosphate	0	0	0	0	0	0	0	0	0	0	0	0	0	0	0	0	0	0
R_rxn05593_c0	1 L-Inositol + 1 H+ = 1 L-Inositol + 1 H+	0	0	0	0	0	0	0	0	0	0	0	0	0	0	0	0	0	0
R_rxn01519_c0	1 dUTP + 1 H2O = 1 PPi + 1 dUMP	0.0139567	0.0125994	0.00755149	0.0157162	0.0138851	0.00556394	0.0075639	0.00900092	0.00164884	0.00090942	0.00082442	0.00143102	0.00046987	0.0022219	0.00143701	0.00171459	0.00171459	0.000164884
R_rxn09996_c0	45.0 UDP-N-acetyl-D-galactosamine + 45.0 UDPglucuronate = 1 teichuronic acid (GlcA + GalNac, 45 repeating unit) + 45.0 UMP + 45.0 H+ + 45.0 UDP	0	0	0	0	0	0	0	0	0	0	0	0	0	0	0	0	0	0
R_rxn00029_c0	2.0 5-Aminolevulinate = 1 H+ + 2.0 H2O + 1 Porphobilinogen	0.0151195	0.0136492	0.00818068	0.0170257	0.015042	0.00602753	0.00819413	0.00975088	0.00178622	0.000985194	0.000893111	0.00155025	0.00050902	0.00240703	0.00155674	0.00185746	0.00185746	0.000178622
R_rxn10338_c0	2.0 Dianteisoheptadecanoylphosphatidylglycerol = 1 Anteisoheptadecanoylcardiolipin (B. subtilis) + 1 Glycerol	0.00408813	0.00369056	0.00221195	0.00460354	0.00406718	0.00162977	0.00221559	0.00263651	0.000482971	0.000266384	0.000241486	0.000419168	0.000137633	0.000650831	0.000420922	0.000502232	0.000502232	4.82971e-05
R_rxn09687_c0	1 H+ + 1 Deoxyinosine = 1 H+ + 1 Deoxyinosine	0	0	0	0	0	0	0	0	0	0	0	0	0	0	0	0	0	0
R_rxn04413_c0	1 Adenosyl cobinamide + 1 GTP = 1 H+ + 1 Adenosyl cobinamide phosphate + 1 GDP	0	0	0	0	0	0	0	0	0	0	0	0	0	0	0	0	0	0
R_rxn01316_c0	1 H2O + 1 N-Acetyl-D-mannosamine + 1 Phosphoenolpyruvate = 1 H+ + 1 Phosphate + 1 Neu5Ac	0	0	0	0	0	0	0	0	0	0	0	0	0	0	0	0	0	0
R_rxn10263_c0	1 Glycerol-3-phosphate + 1 CDP-1,2-dianteisopentadecanoylglycerol = 1 Dianteisopentadecanoylphosphatidylglycerophosphate + 1 CMP	0	0	0	0	0	0	0	0	0	0	0	0	0	0	0	0	0	0
R_rxn05647_c0	1 Salicin + 1 Phosphoenolpyruvate = 1 Pyruvate + 1 Salicin-6P	0	0	0	0	0	0	0	0	0	0	0	0	0	0	0	0	0	0
R_rxn01964_c0	1 Indoleglycerol phosphate + 1 L-Serine = 1 L-Tryptophan + 1 Glyceraldehyde3-phosphate + 1 H2O	0	0	0	0	0	0.0103428	0.0140605	0.0167318	0	0	0	0	0	0	0	0.00318726	0.00318726	0
R_rxn00559_c0	1 D-mannose-6-phosphate = 1 D-fructose-6-phosphate	0	0	0	0	0	0	0	0	0	0	0	0	0	0	0	0	0	0
R_rxn01641_c0	1 5-Formiminotetrahydrofolate + 1 L-Glutamate = 1 N-Formimino-L-glutamate + 1 Tetrahydrofolate	0	0	0	0	0	0	0	0	0	0	0	0	0	0	0	0	0	0
R_rxn10341_c0	2.0 Dianteisopentadecanoylphosphatidylglycerol = 1 Anteisopentadecanoylcardiolipin (B. subtilis) + 1 Glycerol	0	0	0	0	0	0	0	0	0	0	0	0	0	0	0	0	0	0
R_rxn03537_c0	1 H+ + 1 Adenosyl cobinamide phosphate + 1 GTP = 1 Adenosylcobinamide-GDP + 1 PPi	0.00377988	0.00341229	0.00204517	0.00425643	0.00376051	0.00150688	0.00204853	0.00243772	0.000446555	0.000246298	0.000223278	0.000387562	0.000127255	0.000601758	0.000389184	0.000464364	0.000464364	4.46555e-05
R_rxn12510_c0	1 ATP + 1 PAN = 1 4-phosphopantothenate + 1 ADP	0.00755977	0.00682458	0.00409034	0.00851286	0.00752102	0.00301377	0.00409706	0.00487544	0.000893111	0.000492597	0.000446555	0.000775125	0.00025451	0.00120352	0.000778369	0.000928728	0.000928728	8.93111e-05
R_rxn05392_c0	1 H+ + 1 Malonyl-acyl-carrierprotein- + 1 7-methyl-octanoyl-ACP = 1 9-methyl-3-oxo-decanoyl-ACP + 1 ACP + 1 CO2	0.0395836	0.0357341	0.0214174	0.0445741	0.0393807	0.0157803	0.0214526	0.0255282	0.00467641	0.00257928	0.0023382	0.00405862	0.00133264	0.00630171	0.00407561	0.0048629	0.0048629	0.000467641
R_rxn00161_c0	1 L-Malate + 1 NADP = 1 Pyruvate + 1 CO2 + 1 NADPH	0	0	0	0	0	0	0	0	0	0	0	0	0	0	0	0	0	0
R_rxn09207_c0	1 L-Serine + 1 CDP-1,2-ditetradec-7-enoylglycerol = 1 H+ + 1 phosphatidylserine ditetradec-7-enoyl + 1 CMP	0	0	0	0	0	0	0	0	0	0	0	0	0	0	0	0	0	0
R_rxn02380_c0	1 beta-D-Glucose 6-phosphate = 1 D-fructose-6-phosphate	999.853	999.867	-1000	-1000	999.854	999.941	-1000	-1000	-1000	-1000	999.991	-1000	-1000	-1000	-1000	-1000	-1000	-1000
R_rxn00474_c0	1 indol + 1 L-Serine = 1 L-Tryptophan + 1 H2O	0.025944	0.023421	0.0140375	0.0292149	0.0258111	0	0	0	0.00306503	0.00169052	0.00153251	0.00266012	0.000873442	0.00413029	0.00267125	0	0	0.000306503
R_rxn09114_c0	1 CDP-1,2-dioctadec-11-enoylglycerol + 1 Glycerol-3-phosphate = 1 Phosphatidylglycerophosphate dioctadec-11-enoyl + 1 CMP	0	0	0	0	0	0	0	0	0	0	0	0	0	0	0	0	0	0
R_rxn05582_c0	1 H+ + 1 Glycine = 1 H+ + 1 Glycine	0	0	0	0	0	0	0	0	0	0	0	0	0	0	0	0	0	0
R_rxn03435_c0	1 NADP + 1 2,3-Dihydroxy-3-methylvalerate = 1 H+ + 1 (R)-3-Hydroxy-3-methyl-2-oxopentanoate + 1 NADPH	-0.168329	-0.151959	-0.091077	-0.18955	-0.167466	-0.0671056	-0.0912267	-0.108558	-0.0198863	-0.0109683	-0.00994316	-0.0172592	-0.00566701	-0.0267979	-0.0173314	-0.0206794	-0.0206794	-0.00198863
R_rxn12845_c0	1 Gly-Leu + 1 H2O = 1 L-Leucine + 1 Glycine	0	0	0	0	0	0	0	0	0	0	0	0	0	0	0	0	0	0
R_rxn00085_c0	1 NADP + 2.0 L-Glutamate = 1 H+ + 1 2-Oxoglutarate + 1 L-Glutamine + 1 NADPH	0.623275	0.569487	0.341324	0.67264	0.627602	0.238131	0.341885	0.406838	0.0736337	0.0406128	0.0368169	0.0646813	0.02011	0.100429	0.064952	0.077499	0.077499	0.00736337
R_rxn05340_c0	1 NADP + 1 D-3-Hydroxydodecanoyl-[acp] = 1 3-oxododecanoyl-acp + 1 H+ + 1 NADPH	0	0	0	0	0	0	0	0	0	0	0	0	0	0	0	0	0	0
R_rxn00832_c0	1 IMP + 1 H2O = 1 FAICAR	-0.129948	-0.11731	-0.0703103	-0.146331	-0.129281	-0.0518047	-0.0704259	-0.0838056	-0.015352	-0.00846742	-0.007676	-0.0133239	-0.00437486	-0.0206877	-0.0133797	-0.0159642	-0.0159642	-0.0015352
R_rxn00295_c0	1 UDP-N-acetylglucosamine = 1 UDP-N-acetyl-D-galactosamine	0.0257946	0.0232861	0.0139566	0.0290467	0.0256624	0.0102833	0.0139796	0.0166355	0.00304738	0.00168079	0.00152369	0.0026448	0.000868412	0.00410651	0.00265587	0.00316891	0.00316891	0.000304738
R_rxn00265_c0	1 Citrate = 1 Oxaloacetate + 1 Acetate	0	0	0	0	0	0	0	0	0	0	0	0	0	0	0	0	0	0
R_rxn05317_c0	1 Deoxyadenosine + 1 H+ = 1 Deoxyadenosine + 1 H+	0	0	0	0	0	0	0	0	0	0	0	0	0	0	0	0	0	0
R_rxn01368_c0	1 Cytidine + 1 H+ + 1 H2O = 1 Uridine + 1 NH3	0	0	0	0	0	0	0	0	0	0	0	0	0	0	0	0	0	0
R_rxn02187_c0	1 ALCTT = 1 2-Oxo-3-hydroxyisovalerate	0.359057	0.324139	0.194274	0.404325	0.357217	0.143141	0.194593	0.231563	0.042419	0.0233963	0.0212095	0.0368152	0.0120882	0.0571619	0.0369692	0.0441107	0.0441107	0.0042419
R_rxn01219_c0	1 ATP + 1 dCMP = 1 dCDP + 1 ADP	0	0	0	0	0	0	0	0	0	0	0	0	0	0	0	0	0	0
R_rxn03514_c0	1 Precorrin 4 + 1 S-Adenosyl-L-methionine = 1 H+ + 1 S-Adenosyl-homocysteine + 1 Precorrin 5	0	0	0	0	0	0	0	0	0	0	0	0	0	0	0	0	0	0
R_rxn01270_c0	1 Pretyrosine + 1 Oxaloacetate = 1 Prephenate + 1 L-Aspartate	0	0	0	0	0	0	0	0	0	0	0	0	0	0	0	0	0	0
R_rxn10287_c0	1 UDP-glucose + 1 1,2-Dianteisopentadecanoyl-sn-glycerol = 1 UDP + 1 Monoglucosyl-1,2 dianteisopentadecanoylglycerol	0	0	0	0	0	0	0	0	0	0	0	0	0	0	0	0	0	0
R_rxn00272_c0	1 Glyoxalate + 1 L-Alanine = 1 Pyruvate + 1 Glycine	-0.226778	-0.204724	-0.122702	-0.255369	-0.225616	-0.090407	-0.122904	-0.146254	-0.0267916	-0.0147769	-0.0133958	-0.0232522	-0.0076348	-0.0361031	-0.0233495	-0.02786	-0.02786	-0.00267916
R_rxn10160_c0	1 D-Galactonate + 1 H+ = 1 D-Galactonate + 1 H+	0	0	0	0	0	0	0	0	0	0	0	0	0	0	0	0	0	0
R_rxn07441_c0	1 LL-2,6-Diaminopimelate + 1 2-Oxoglutarate = 1 H+ + 1 H2O + 1 tetrahydrodipicolinate + 1 L-Glutamate	0	0	0	0	0	0	0	0	0	0	0	0	0	0	0	0	0	0
R_rxn01021_c0	1 5-Methylthioadenosine + 1 H2O = 1 5-Methylthio-D-ribose + 1 Adenine	0	0	0	0	0	0	0	0	0	0	0	0	0	0	0	0	0	0
R_rxn05543_c0	1 ATP + 1 H2O + 1 Ala-His = 1 H+ + 1 Phosphate + 1 Ala-His + 1 ADP	0	0	0	0	0	0	0	0	0	0	0	0	0	0	0	0	0	0
R_rxn01127_c0	1 dAMP + 1 ATP = 1 dADP + 1 ADP	0	0	0	0	0	0	0	0	0	0	0	0	0	0	0	0	0	0
R_rxn08309_c0	1 1,2-dihexadecanoyl-sn-glycerol 3-phosphate + 1 CTP = 1 PPi + 1 CDP-1,2-dihexadecanoylglycerol	0	0	0	0	0	0	0	0	0	0	0	0	0	0	0	0	0	0
R_rxn03892_c0	1 pendp + 1 Isopentenyldiphosphate = 1 all-trans-Hexaprenyl diphosphate + 1 PPi	0.00755977	0.00682458	0.00409034	0.00851286	0.00752102	0.00301377	0.00409706	0.00487544	0.000893111	0.000492597	0.000446555	0.000775125	0.00025451	0.00120352	0.000778369	0.000928728	0.000928728	8.93111e-05
R_rxn05461_c0	1 H+ + 1 3-Oxooctodecanoyl-ACP + 1 NADPH = 1 NADP + 1 3-Hydroxyoctodecanoyl-ACP	0	0	0	0	0	0	0	0	0	0	0	0	0	0	0	0	0	0
R_rxn00641_c0	1 D-Mannose1-phosphate + 1 GTP = 1 GDP-mannose + 1 PPi	0	0	0	0	0	0	0	0	0	0	0	0	0	0	0	0	0	0
R_rxn08312_c0	1 1,2-dioctadec-11-enoyl-sn-glycerol 3-phosphate + 1 CTP = 1 CDP-1,2-dioctadec-11-enoylglycerol + 1 PPi	0	0	0	0	0	0	0	0	0	0	0	0	0	0	0	0	0	0
R_rxn10271_c0	1 UDP-glucose + 1 Monoglucosyl-1,2 dipalmitoylglycerol = 1 UDP + 1 Diglucosyl-1,2 dipalmitoylglycerol	0	0	0	0	0	0	0	0	0	0	0	0	0	0	0	0	0	0
R_rxn05144_c0	1 D-Ribulose5-phosphate + 1 Glyceraldehyde3-phosphate + 1 L-Glutamine = 2.0 H+ + 1 Pyridoxal phosphate + 1 Phosphate + 3.0 H2O + 1 L-Glutamate	0.00377988	0.00341229	0.00204517	0.00425643	0.00376051	0.00150688	0.00204853	0.00243772	0.000446555	0.000246298	0.000223278	0.000387562	0.000127255	0.000601758	0.000389184	0.000464364	0.000464364	4.46555e-05
R_rxn12849_c0	1 ATP + 1 Gly-Leu + 1 H2O = 1 Gly-Leu + 1 Phosphate + 1 ADP	0	0	0	0	0	0	0	0	0	0	0	0	0	0	0	0	0	0
R_rxn00410_c0	1 ATP + 1 NH3 + 1 UTP = 2.0 H+ + 1 Phosphate + 1 ADP + 1 CTP	0	0	0	0	0	0	0	0	0	0	0	0	0	0	0	0	0	0
R_rxn05160_c0	1 D-Ribose + 1 ATP + 1 H2O = 1 H+ + 1 D-Ribose + 1 Phosphate + 1 ADP	0	0	0	0	0	0	0	0	0	0	0	0	0	0	0	0	0	0
R_rxn02792_c0	1 L-3-Cyanoalanine + 1 H+ + 1 L-Glutamate = 1 gamma-Glutamyl-3-aminopropiononitrile + 1 H2O + 1 CO2	0	0	0	0	0	0	0	0	0	0	0	0	0	0	0	0	0	0
R_rxn05368_c0	1 H+ + 1 8-methyl-3-oxo-decanoyl-ACP + 1 NADPH = 1 NADP + 1 8-methyl-3-hydroxy-decanoyl-ACP	0.0395836	0.0357341	0.0214174	0.0445741	0.0393807	0.0157803	0.0214526	0.0255282	0.00467641	0.00257928	0.0023382	0.00405862	0.00133264	0.00630171	0.00407561	0.0048629	0.0048629	0.000467641
R_rxn05221_c0	1 Na+ + 1 L-Proline = 1 Na+ + 1 L-Proline	0	0	0	0	0	0	0	0	0	0	0	0	0	0	0	0	0	0
R_rxn00568_c0	1 Nitrite + 5.0 H+ + 3.0 NADH = 1 NH3 + 2.0 H2O + 3.0 NAD	0	0	0	0	0	0	0	0	0	0	0	0	0	0	0	0	0	0
R_rxn09210_c0	1 CDP-1,2-dioctadecanoylglycerol + 1 L-Serine = 1 H+ + 1 phosphatidylserine dioctadecanoyl + 1 CMP	0.00408813	0.00369056	0.00221195	0.00460354	0.00406718	0.00162977	0.00221559	0.00263651	0.000482971	0.000266384	0.000241486	0.000419168	0.000137633	0.000650831	0.000420922	0.000502232	0.000502232	4.82971e-05
R_rxn00395_c0	1 H2O + 1 L-Arginine = 1 NH3 + 1 Citrulline	0	0	0	0	0	0	0	0	0	0	0	0	0	0	0	0	0	0
R_rxn10256_c0	1 ATP + 1 1,2-Diisopentadecanoyl-sn-glycerol = 1 1,2-diisopentadecanoyl-sn-glycerol 3-phosphate + 1 ADP	0	0	0	0	0	0	0	0	0	0	0	0	0	0	0	0	0	0
R_rxn00171_c0	1 H+ + 1 NADH + 1 Acetyl-CoA = 1 NAD + 1 CoA + 1 Acetaldehyde	0.834174	2.79657	2.04503	0	1.03491	5.36704	0	0	0	0	0	0	0	0	0	0	0	0
R_rxn01000_c0	1 Prephenate + 1 H+ = 1 H2O + 1 CO2 + 1 Phenylpyruvate	0.0838793	0.075722	0.0453843	0.0944543	0.0834493	0.0334392	0.0454589	0.0540953	0.00990949	0.0054656	0.00495474	0.00860038	0.00282391	0.0133536	0.00863637	0.0103047	0.0103047	0.000990949
R_rxn01138_c0	1 H+ + 1 Adenosine + 1 Phosphate = 1 Ribose 1-phosphate + 1 Adenine	0.0113397	0.0102369	0.00613551	0.0127693	0.0112815	0.00452065	0.00614559	0.00731316	0.00133967	0.000738895	0.000669833	0.00116269	0.000381765	0.00180527	0.00116755	0.00139309	0.00139309	0.000133967
R_rxn02305_c0	1 H+ + 1 4-Amino-2-methyl-5-diphosphomethylpyrimidine + 1 4-Methyl-5--2-phosphoethyl-thiazole = 1 Thiamine phosphate + 1 PPi	0.00377988	0.00341229	0.00204517	0.00425643	0.00376051	0.00150688	0.00204853	0.00243772	0.000446555	0.000246298	0.000223278	0.000387562	0.000127255	0.000601758	0.000389184	0.000464364	0.000464364	4.46555e-05
R_rxn05303_c0	1 H+ + 1 L-Arginine = 1 H+ + 1 L-Arginine	0	0	0	0	0	0	0	0	0	0	0	0	0	0	0	0	0	0
R_rxn05533_c0	1 ATP + 1 H2O + 1 ala-L-asp-L = 1 H+ + 1 Phosphate + 1 ADP + 1 ala-L-asp-L	0	0	0	0	0	0	0	0	0	0	0	0	0	0	0	0	0	0
R_rxn10211_c0	1 Palmitoyl-CoA + 1 1-hexadecanoyl-sn-glycerol 3-phosphate = 1 1,2-dihexadecanoyl-sn-glycerol 3-phosphate + 1 CoA	0	0	0	0	0	0	0	0	0	0	0	0	0	0	0	0	0	0
R_rxn12641_c0	1 H2O + 1 L-alanylglycine = 1 L-Alanine + 1 Glycine	0	0	0	0	0	0	0	0	0	0	0	0	0	0	0	0	0	0
R_rxn10315_c0	1 Isohexadecanoyllipoteichoic acid (n-24), linked, unsubstituted + 24.0 UDP-N-acetylglucosamine = 24.0 UDP + 1 Isohexadecanoyllipoteichoic acid (n-24), linked, N-acetyl-D-glucosamine	0	0	0	0	0	0	0	0	0	0	0	0	0	0	0	0	0	0
R_rxn10205_c0	1 Glycerol-3-phosphate + 1 fa11coa = 1 1-isoheptadecanoyl-sn-glycerol 3-phosphate + 1 CoA	0.0197918	0.0178671	0.0107087	0.022287	0.0196904	0.00789017	0.0107263	0.0127641	0.0023382	0.00128964	0.0011691	0.00202931	0.000666318	0.00315086	0.0020378	0.00243145	0.00243145	0.00023382
R_rxn00239_c0	1 ATP + 1 GMP = 1 ADP + 1 GDP	0.0492631	0.0444723	0.0266546	0.0554739	0.0490106	0.0196392	0.0266984	0.0317707	0.00581994	0.00321	0.00290997	0.00505109	0.00165851	0.00784269	0.00507222	0.00605204	0.00605204	0.000581994
R_rxn00612_c0	1 NADP + 1 Glycerol-3-phosphate = 1 H+ + 1 Glycerone-phosphate + 1 NADPH	0	0	0	0	0	0	0	0	0	0	-6.8945	0	0	-0.866765	0	0	0	0
R_rxn05418_c0	1 8-methyl-3-oxo-nonanoyl-ACP + 1 H+ + 1 NADPH = 1 8-methyl-3-hydroxy-nonanoyl-ACP + 1 NADP	0	0	0	0	0	0	0	0	0	0	0	0	0	0	0	0	0	0
R_rxn00711_c0	1 Uracil + 1 PRPP = 1 UMP + 1 PPi	0	0	0	0	0	0	0	0	0	0	0	0	0	0	0	0	0	0
R_rxn10309_c0	1 Stearoyllipoteichoic acid (n-24), linked, unsubstituted + 24.0 UDP-N-acetylglucosamine = 24.0 UDP + 1 Stearoyllipoteichoic acid (n-24), linked, N-acetyl-D-glucosamine	0.000859822	0.000776204	0.000465221	0.000968223	0.000855415	0.000342775	0.000465986	0.000554515	0.000101579	5.60262e-05	5.07896e-05	8.816e-05	2.89471e-05	0.000136884	8.85289e-05	0.00010563	0.00010563	1.01579e-05
R_rxn12633_c0	1 H2O + 1 ala-L-asp-L = 1 L-Aspartate + 1 L-Alanine	0	0	0	0	0	0	0	0	0	0	0	0	0	0	0	0	0	0
R_rxn04113_c0	1 H+ + 1 1-Hydroxy-2-methyl-2-butenyl 4-diphosphate + 1 NADPH = 1 Isopentenyldiphosphate + 1 NADP + 1 H2O	0	0	0	0	0	0	0	0	0	0	0	0	0	0	0	0	0	0
R_rxn05250_c0	1 H+ + 1 ATP + 1 fa6 + 1 CoA = 1 AMP + 1 PPi + 1 fa6coa	0	0	0	0	0	0	0	0	0	0	0	0	0	0	0	0	0	0
R_rxn06023_c0	1 apo-ACP + 1 CoA = 1 ACP + 1 Adenosine 3-5-bisphosphate	0.00377988	0.00341229	0.00204517	0.00425643	0.00376051	0.00150688	0.00204853	0.00243772	0.000446555	0.000246298	0.000223278	0.000387562	0.000127255	0.000601758	0.000389184	0.000464364	0.000464364	4.46555e-05
R_rxn00422_c0	1 Pyruvate + 1 L-Serine = 1 Hydroxypyruvate + 1 L-Alanine	0	0	0	0	0	0	0	0	0	0	0	0	0	0	0	0	0	0
R_rxn05526_c0	1 H+ + 1 chromate = 1 H+ + 1 chromate	0	0	0	0	0	0	0	0	0	0	0	0	0	0	0	0	0	0
R_rxn03174_c0	1 2,5-Diamino-6-(5'-triphosphoryl-3',4'-trihydroxy-2'-oxopentyl)- amino-4-oxopyrimidine = 1 H2O + 1 7,8-Dihydroneopterin 3'-triphosphate	0	0.0102369	0	0.0127693	0.0112815	0.00452065	0.00614559	0.00731316	0.00133967	0.000738895	0	0	0	0	0.00116755	0.00139309	0.00139309	0.000133967
R_rxn00146_c0	2.0 Cytochrome c3+ + 1 D-Lactate = 2.0 H+ + 1 Pyruvate + 2.0 Cytochrome c2+	0	0	0	0	0	0	0	0	0	0	0	0	0	0	0	0	0	0
R_rxn00763_c0	1 NAD + 1 Glycerol = 1 H+ + 1 NADH + 1 D-Glyceraldehyde	0.0122644	0.0110717	0.00663586	0.0138106	0.0122015	0.0048893	0.00664676	0.00790954	0.00144891	0.000799152	0.000724457	0.0012575	0.000412898	0.00195249	0.00126277	0.0015067	0.0015067	0.000144891
R_rxn10174_c0	1 ATP + 1 H2O + 1 Maltohexaose = 1 H+ + 1 Phosphate + 1 Maltohexaose + 1 ADP	0	0	0	0	0	0	0	0	0	0	0	0	0	0	0	0	0	0
R_rxn05393_c0	1 9-methyl-3-oxo-decanoyl-ACP + 1 H+ + 1 NADPH = 1 NADP + 1 9-methyl-3-hydroxy-decanoyl-ACP	0.0395836	0.0357341	0.0214174	0.0445741	0.0393807	0.0157803	0.0214526	0.0255282	0.00467641	0.00257928	0.0023382	0.00405862	0.00133264	0.00630171	0.00407561	0.0048629	0.0048629	0.000467641
R_rxn00138_c0	1 ATP + 1 NH3 + 1 Deamido-NAD = 1 AMP + 1 NAD + 1 PPi	0.00755977	0	0	0.00851286	0	0.00301377	0	0	0.000893111	0.000492597	0.000446555	0	0.00025451	0	0	0	0	8.93111e-05
R_rxn10298_c0	1 Palmitoyllipoteichoic acid (n-24), linked, unsubstituted + 24.0 UDP-glucose = 24.0 UDP + 1 Palmitoyllipoteichoic acid (n-24), linked, glucose substituted	0	0	0	0	0	0	0	0	0	0	0	0	0	0	0	0	0	0
R_rxn03136_c0	1 SAICAR = 1 AICAR + 1 Fumarate	0.0909339	0.0820906	0.0492013	0.102398	0.0904678	0.0362516	0.0492822	0.058645	0.0107429	0.00592528	0.00537146	0.00932371	0.00306141	0.0144767	0.00936273	0.0111714	0.0111714	0.00107429
R_rxn01137_c0	1 H+ + 1 H2O + 1 Adenosine = 1 Inosine + 1 NH3	0	0	0	0	0	0	0	0	0	0	0	0	0	0	0	0	0	0
R_rxn08194_c0	1 ATP + 1 Cbl = 1 Triphosphate + 1 Calomide	0	0	0	0	0	0	0	0	0	0	0	0	0	0	0	0	0	0
R_rxn00988_c0	1 H+ + 1 ATP + 1 Acetoacetate + 1 CoA = 1 AMP + 1 PPi + 1 Acetoacetyl-CoA	0	0	0	0	0	0	0	0	0	0	0	0	0	0	0	0	0	0
R_rxn05605_c0	1 L-Malate + 1 H+ = 1 L-Malate + 1 H+	-1000	-1000	-1000	-1000	-1000	-1000	-1000	-1000	-1000	-1000	-1000	-1000	-1000	-1000	-1000	-1000	-1000	-1000
R_rxn04082_c0	1 L-ribulose-5-phosphate = 1 D-Xylulose5-phosphate	0	0	0	0	0	0	0	0	0	0	0	0	0	0	0	0	0	0
R_rxn05617_c0	1 D-Mannitol + 1 Phosphoenolpyruvate = 1 Pyruvate + 1 D-mannitol-1-phosphate	0	0	0	0	0	0	0	0	0	0	0	0	0	0	0	0	0	0
R_rxn04996_c0	1 H+ + 1 1-Hydroxy-2-methyl-2-butenyl 4-diphosphate + 1 NADPH = 1 NADP + 1 H2O + 1 DMAPP	0	0	0	0	0	0	0	0	0	0	0	0	0	0.0013404	0	0	0	0
R_rxn05236_c0	1 UTP + 1 trdrd = 1 dUTP + 1 trdox + 1 H2O	0.0139567	0.0125994	0.00755149	0.0157162	0.0138851	0.00556394	0.0075639	0.00900092	0.00164884	0.00090942	0.00082442	0.00143102	0.00046987	0.0022219	0.00143701	0.00171459	0.00171459	0.000164884
R_rxn02835_c0	1 H2O + 1 Phosphoribosyl-AMP = 1 phosphoribosylformiminoaicar-phosphate	0.0390136	0.0352196	0.021109	0.0439322	0.0388137	0.0155531	0.0211437	0.0251606	0.00460907	0.00254214	0.00230453	0.00400018	0.00131345	0.00621097	0.00401692	0.00479287	0.00479287	0.000460907
R_rxn02373_c0	1 L-Glutamyl 5-phosphate + 1 NADPH = 1 L-Glutamate5-semialdehyde + 1 NADP + 1 Phosphate	0.0766617	0.0692064	0.0414791	0.0863268	0.0762688	0.0305619	0.0415473	0.0494406	0.00905681	0.0049953	0.00452841	0.00786035	0.00258092	0.0122046	0.00789324	0.009418	0.009418	0.000905681
R_rxn05581_c0	1 Glycerol = 1 Glycerol	0	0	0	0	0	0	0	0	0	0	0	0	0	0	0	0	0	0
R_rxn00726_c0	1 NH3 + 1 Chorismate = 1 H+ + 1 Pyruvate + 1 H2O + 1 Anthranilate	0	0	0	0.0292149	0	0.0103428	0	0	0	0	0	0	0.000873442	0	0	0	0	0
R_rxn05287_c0	1 Isopentenyldiphosphate + 1 Geranylgeranyl diphosphate = 1 pendp + 1 PPi	0.00755977	0.00682458	0.00409034	0.00851286	0.00752102	0.00301377	0.00409706	0.00487544	0.000893111	0.000492597	0.000446555	0.000775125	0.00025451	0.00120352	0.000778369	0.000928728	0.000928728	8.93111e-05
R_rxn05345_c0	1 H+ + 1 Malonyl-acyl-carrierprotein- + 1 Dodecanoyl-ACP = 1 ACP + 1 CO2 + 1 3-oxotetradecanoyl-acp	0	0	0	0	0	0	0	0	0	0	0	0	0	0	0	0	0	0
R_rxn02177_c0	1 Isochorismate + 1 H2O = 1 Pyruvate + 1 2,3-Dihydroxy-2,3-dihydrobenzoate	0	0	0	0	0	0	0	0	0	0	0	0	0	0	0	0	0	0
R_rxn10218_c0	1 fa4coa + 1 1-anteisopentadecanoyl-sn-glycerol 3-phosphate = 1 1,2-dianteisopentadecanoyl-sn-glycerol 3-phosphate + 1 CoA	0	0	0	0	0	0	0	0	0	0	0	0	0	0	0	0	0	0
R_rxn03147_c0	1 5'-Phosphoribosyl-4-carboxy-5-aminoimidazole + 1 ATP + 1 L-Aspartate = 2.0 H+ + 1 Phosphate + 1 ADP + 1 SAICAR	0.0909339	0.0820906	0.0492013	0.102398	0.0904678	0.0362516	0.0492822	0.058645	0.0107429	0.00592528	0.00537146	0.00932371	0.00306141	0.0144767	0.00936273	0.0111714	0.0111714	0.00107429
R_rxn01211_c0	1 H2O + 1 5-10-Methenyltetrahydrofolate = 1 10-Formyltetrahydrofolate + 1 H+	-6.59801	-0.244215	-0.146371	-0.304629	-5.74414	-1.51158	-8.15627	-7.80599	-4.69138	-2.27832	-4.84569	-4.73215	-0.210481	-4.58411	-4.73103	-4.67907	-4.67907	-4.96914
R_rxn03884_c0	1 2-Keto-3-deoxy-6-phosphogluconate = 1 Glyceraldehyde3-phosphate + 1 Pyruvate	0	0	0	0	0	0	0	0	0	0	0	0	0	0	0	0	0	0
R_rxn01602_c0	1 NADP + 1 Dihydrofolate = 1 H+ + 1 Folate + 1 NADPH	0	0	0	0	0	0	0	0	0	0	0	0	0	0	0	0	0	0
R_rxn00670_c0	1 Propionyl-CoA + 1 H+ + 1 Phosphate = 1 Propionyl phosphate + 1 CoA	0	0	0	0	0	0	0	0	0	0	0	0	0	0	0	0	0	0
R_rxn10335_c0	2.0 Phosphatidylglycerol ditetradecanoyl = 1 Myristoylcardiolipin (B. subtilis) + 1 Glycerol	0	0	0	0	0	0	0	0	0	0	0	0	0	0	0	0	0	0
R_rxn00184_c0	1 NADP + 1 H2O + 1 L-Glutamate = 1 H+ + 1 NH3 + 1 2-Oxoglutarate + 1 NADPH	-3.6092	-3.26503	-1.95691	-4.03501	-3.59822	-1.42849	-1.96012	-5.1371	-0.42639	-0.235176	-0.213195	-0.370836	-0.120635	-0.575788	-0.372388	-1.68502	-1.48562	-0.042639
R_rxn00650_c0	1 H2O + 1 Cys-Gly = 1 L-Cysteine + 1 Glycine	-0.00377988	-0.00341229	-0.00204517	-0.00425643	-0.00376051	-0.00150688	-0.00204853	-0.00243772	-0.000446555	-0.000246298	-0.000223278	-0.000387562	-0.000127255	-0.000601758	-0.000389184	-0.000464364	-0.000464364	-4.46555e-05
R_rxn01241_c0	1 Dihydrolipoamide + 1 NAD = 1 Lipoamide + 1 H+ + 1 NADH	0	0	0	0	0	0	0	0	0	0	0	0	0	0	0	0	0	0
R_rxn10229_c0	1 L-Serine + 1 CDP-1,2-diisopentadecanoylglycerol = 1 H+ + 1 Diisopentadecanoylphosphatidylserine + 1 CMP	0	0	0	0	0	0	0	0	0	0	0	0	0	0	0	0	0	0
R_rxn01522_c0	1 XAN + 1 H2O + 1 NAD = 1 H+ + 1 Urate + 1 NADH	0	0	0	0	0	0	0	0	0	0	0	0	0	0	0	0	0	0
R_rxn08300_c0	1 ATP + 1 1,2-Diacyl-sn-glycerol dioctadec-11-enoyl = 1 1,2-dioctadec-11-enoyl-sn-glycerol 3-phosphate + 1 ADP	0	0	0	0	0	0	0	0	0	0	0	0	0	0	0	0	0	0
R_rxn00836_c0	1 HYXN + 1 PRPP = 1 IMP + 1 PPi	0	0	0	0	0	0	0	0	0	0	0	0	0	0	0	0	0	0
R_rxn00776_c0	1 Uracil + 1 ribose-5-phosphate = 1 H2O + 1 Pseudouridine 5'-phosphate	0	0	0	0	0	0	0	0	0	0	0	0	0	0	0	0	0	0
R_rxn09110_c0	1 Glycerol-3-phosphate + 1 CDP-1,2-ditetradec-7-enoylglycerol = 1 Phosphatidylglycerophosphate ditetradec-7-enoyl + 1 CMP	0	0	0	0	0	0	0	0	0	0	0	0	0	0	0	0	0	0
R_rxn12646_c0	1 H2O + 1 Gly-Gln = 1 L-Glutamine + 1 Glycine	0	0	0	0	0	0	0	0	0	0	0	0	0	0	0	0	0	0
R_rxn09296_c0	1 trdrd + 1 H2O2 = 1 trdox + 2.0 H2O	0	0	0	0	0	0	0	0	0	0	0	0	0	0	0	0	0	0
R_rxn01255_c0	1 5-O--1-Carboxyvinyl-3-phosphoshikimate = 1 H+ + 1 Phosphate + 1 Chorismate	0.185366	0.167339	0.100295	0.208736	0.184416	0.0738978	0.10046	0.119546	0.0218991	0.0120785	0.0109496	0.0190061	0.0062406	0.0295103	0.0190857	0.0227725	0.0227725	0.00218991
R_rxn03194_c0	1 2-Hydroxyethyl-ThPP + 1 2-Oxobutyrate = 1 2-Aceto-2-hydroxybutanoate + 1 TPP	0.168329	0.151959	0.091077	0.18955	0.167466	0.0671056	0.0912267	0.108558	0.0198863	0.0109683	0.00994316	0.0172592	0.00566701	0.0267979	0.0173314	0.0206794	0.0206794	0.00198863
R_rxn08552_c0	1 Glycerol-3-phosphate + 1 Octadecenoyl-ACP = 1 ACP + 1 1-octadec-11-enoyl-sn-glycerol 3-phosphate	0	0	0	0	0	0	0	0	0	0	0	0	0	0	0	0	0	0
R_rxn03958_c0	1 NADP + 1 2-C-methyl-D-erythritol4-phosphate = 1 H+ + 1 1-deoxy-D-xylulose5-phosphate + 1 NADPH	-0.0699362	-0.0631349	-0.0378402	-0.0787534	-0.0695777	-0.0278807	-0.0379023	-0.0451032	-0.00826226	-0.00455706	-0.00413113	-0.00717076	-0.0023545	-0.0111338	-0.00720077	-0.00859176	-0.00859176	-0.000826226
R_rxn10274_c0	1 Monoglucosyl-1,2 diisoheptadecanoylglycerol + 1 UDP-glucose = 1 UDP + 1 Diglucosyl-1,2 diisoheptadecanoylglycerol	0.00343929	0.00310482	0.00186088	0.00387289	0.00342166	0.0013711	0.00186394	0.00221806	0.000406317	0.000224105	0.000203159	0.00035264	0.000115788	0.000547535	0.000354116	0.000422521	0.000422521	4.06317e-05
R_rxn10236_c0	2.0 H+ + 1 Dianteisopentadecanoylphosphatidylserine = 1 Dianteisopentadecanoylphosphatidylethanolamine + 1 CO2	0	0	0	0	0	0	0	0	0	0	0	0	0	0	0	0	0	0
R_rxn10306_c0	1 Isohexadecanoyllipoteichoic acid (n-24), linked, unsubstituted + 24.0 UDP-glucose = 24.0 UDP + 1 Isohexadecanoyllipoteichoic acid (n-24), linked, glucose substituted	0	0	0	0	0	0	0	0	0	0	0	0	0	0	0	0	0	0
R_rxn10222_c0	1 1,2-diisotetradecanoyl-sn-glycerol 3-phosphate + 1 CTP = 1 CDP-1,2-diisotetradecanoylglycerol + 1 PPi	0	0	0	0	0	0	0	0	0	0	0	0	0	0	0	0	0	0
R_rxn00392_c0	1 ATP + 1 Riboflavin = 1 FMN + 1 ADP	0.00377988	0.00341229	0.00204517	0.00425643	0.00376051	0.00150688	0.00204853	0.00243772	0.000446555	0.000246298	0.000223278	0.000387562	0.000127255	0.000601758	0.000389184	0.000464364	0.000464364	4.46555e-05
R_rxn01280_c0	1 NAD + 1 Glycerate = 1 Tartronate semialdehyde + 1 H+ + 1 NADH	-0.113389	-0.102362	-0.0613511	-0.127685	-0.112808	-0.0452035	-0.0614519	-0.0731268	-0.0133958	-0.00738847	-0.00669789	-0.0116261	-0.0038174	-0.0180516	-0.0116748	-0.01393	-0.01393	-0.00133958
R_rxn10284_c0	1 1,2-Dianteisoheptadecanoyl-sn-glycerol + 1 UDP-glucose = 1 UDP + 1 Monoglucosyl-1,2 dianteisoheptadecanoylglycerol	0.00343929	0.00310482	0.00186088	0.00387289	0.00342166	0.0013711	0.00186394	0.00221806	0.000406317	0.000224105	0.000203159	0.00035264	0.000115788	0.000547535	0.000354116	0.000422521	0.000422521	4.06317e-05
R_rxn00328_c0	1 4-Hydroxy-2-oxoglutarate = 1 Pyruvate + 1 Glyoxalate	0	0	0	0	0	0	0	0	0	0	0	0	0	0	0	0	0	0
R_rxn05336_c0	1 R-3-hydroxypalmitoyl-acyl-carrierprotein- + 1 NADP = 1 3-oxohexadecanoyl-acp + 1 H+ + 1 NADPH	0	0	0	0	0	0	0	0	0	0	0	0	0	0	0	0	0	0
R_rxn02287_c0	1 UroporphyrinogenIII + 2.0 S-Adenosyl-L-methionine = 2.0 H+ + 2.0 S-Adenosyl-homocysteine + 1 Precorrin 2	0.00377988	0.00341229	0.00204517	0.00425643	0.00376051	0.00150688	0.00204853	0.00243772	0.000446555	0.000246298	0.000223278	0.000387562	0.000127255	0.000601758	0.000389184	0.000464364	0.000464364	4.46555e-05
R_rxn02475_c0	1 2,5-Diamino-6-(5'-phosphoribosylamino)-4-pyrimidineone + 1 H+ + 1 H2O = 1 5-Amino-6--5-phosphoribosylaminouracil + 1 NH3	0.00755977	0.00682458	0.00409034	0.00851286	0.00752102	0.00301377	0.00409706	0.00487544	0.000893111	0.000492597	0.000446555	0.000775125	0.00025451	0.00120352	0.000778369	0.000928728	0.000928728	8.93111e-05
R_rxn01304_c0	1 Succinyl-CoA + 1 L-Homoserine = 1 CoA + 1 O-Succinyl-L-homoserine	0	0	0	0	0	0	0	0	0	0	0	0	0	0	0	0	0	0
R_rxn08295_c0	1 ATP + 1 1,2-Diacyl-sn-glycerol ditetradecanoyl = 1 1,2-ditetradecanoyl-sn-glycerol 3-phosphate + 1 ADP	0	0	0	0	0	0	0	0	0	0	0	0	0	0	0	0	0	0
R_rxn05312_c0	1 H+ + 1 Phosphate = 1 H+ + 1 Phosphate	0.591357	0.533848	0.319964	0.665912	0.588326	0.23575	0.32049	0.381378	0.0698629	0.038533	0.0349315	0.0606335	0.0199088	0.0941441	0.0608873	0.072649	0.072649	0.00698629
R_rxn05671_c0	1 Xylose + 1 H+ = 1 Xylose + 1 H+	0	0	0	0	0	0	0	0	0	0	0	0	0	0	0	0	0	0
R_rxn02774_c0	1 NAD + 1 Precorrin 2 = 1 H+ + 1 NADH + 1 Sirohydrochlorin	0.00377988	0.00341229	0.00204517	0.00425643	0.00376051	0.00150688	0.00204853	0.00243772	0.000446555	0.000246298	0.000223278	0.000387562	0.000127255	0.000601758	0.000389184	0.000464364	0.000464364	4.46555e-05
R_rxn05172_c0	1 Taurine + 1 ATP + 1 H2O = 1 H+ + 1 Taurine + 1 Phosphate + 1 ADP	0	0	0	0	0	0	0	0	0	0	0	0	0	0	0	0	0	0
R_rxn10303_c0	1 Isotetradecanoyllipoteichoic acid (n-24), linked, unsubstituted + 24.0 UDP-glucose = 1 Isotetradecanoyllipoteichoic acid (n-24), linked, glucose substituted + 24.0 UDP	0	0	0	0	0	0	0	0	0	0	0	0	0	0	0	0	0	0
R_rxn03408_c0	1 Undecaprenyl-diphospho-N-acetylmuramoyl-L-alanyl-D-glutamyl-meso-2-6-diaminopimeloyl-D-alanyl-D-alanine + 1 UDP-N-acetylglucosamine = 1 UDP + 1 Undecaprenyl-diphospho-N-acetylmuramoyl--N-acetylglucosamine-L-ala-D-glu-meso-2-6-diaminopimeloyl-D-ala-D-ala	0.000859822	0.000776204	0.000465221	0.000968223	0.000855415	0.000342775	0.000465986	0.000554515	0.000101579	5.60262e-05	5.07896e-05	8.816e-05	2.89471e-05	0.000136884	8.85289e-05	0.00010563	0.00010563	1.01579e-05
R_rxn09203_c0	1 phosphatidylserine dioctadec-11-enoyl + 2.0 H+ = 1 CO2 + 1 phosphatidylethanolamine dioctadec-11-enoyl	0	0	0	0	0	0	0	0	0	0	0	0	0	0	0	0	0	0
R_rxn01485_c0	1 D-Glucosamine1-phosphate = 1 D-Glucosamine phosphate	-0.0945804	-0.0853825	-0.0511743	-0.106505	-0.0940956	-0.0377053	-0.0512584	-0.0609967	-0.0111737	-0.00616289	-0.00558686	-0.0096976	-0.00318418	-0.0150572	-0.00973818	-0.0116193	-0.0116193	-0.00111737
R_rxn13784_c0	1 RNA transcription = 1 RNA transcription	0	0	0	0	0	0	0	0	0	0	0	0	0	0	0	0	0	0
R_rxn10184_c0	1 Phosphoenolpyruvate + 1 Sorbitol = 1 Pyruvate + 1 Sorbitol 6-phosphate	0	0	0	0	0	0	0	0	0	0	0	0	0	0	0	0	0	0
R_rxn00245_c0	1 Tartrate = 1 Oxaloacetate + 1 H2O	0	0	0	0	0	0	0	0	0	0	0	0	0	0	0	0	0	0
R_rxn01291_c0	1 NADP + 1 L-Lyxitol = 1 H+ + 1 L-Arabinose + 1 NADPH	0	0	0	0	0	0	0	0	0	0	0	0	0	0	0	0	0	0
R_rxn05571_c0	1 H+ + 1 GLCN = 1 H+ + 1 GLCN	0	0	0	0	0	0	0	0	0	0	0	0	0	0	0	0	0	0
R_rxn05540_c0	1 ATP + 1 H2O + 1 Ala-Gln = 1 H+ + 1 Phosphate + 1 ADP + 1 Ala-Gln	0	0	0	0	0	0	0	0	0	0	0	0	0	0	0	0	0	0
R_rxn01201_c0	1 4-Hydroxybutanoate + 1 NAD = 1 H+ + 1 4-Oxobutanoate + 1 NADH	0	0	0	0	0	0	0	0	0	0	0	0	0	0	0	0	0	0
R_rxn01629_c0	1 5-Aminolevulinate = 1 L-Glutamate1-semialdehyde	-0.0302391	-0.0272983	-0.0163614	-0.0340514	-0.0300841	-0.0120551	-0.0163883	-0.0195018	-0.00357244	-0.00197039	-0.00178622	-0.0031005	-0.00101804	-0.00481406	-0.00311347	-0.00371491	-0.00371491	-0.000357244
R_rxn10204_c0	1 Glycerol-3-phosphate + 1 strcoa = 1 1-octadecanoyl-sn-glycerol 3-phosphate + 1 CoA	0.0197918	0.0178671	0.0107087	0.022287	0.0196904	0.00789017	0.0107263	0.0127641	0.0023382	0.00128964	0.0011691	0.00202931	0.000666318	0.00315086	0.0020378	0.00243145	0.00243145	0.00023382
R_rxn05669_c0	1 H+ + 1 L-Valine = 1 H+ + 1 L-Valine	0	0	0	0	0	0	0	0	0	0	0	0	0	0	0	0	0	0
R_rxn08086_c0	1 1-hexadecanoyl-sn-glycerol 3-phosphate + 1 Palmitoyl-ACP = 1 ACP + 1 1,2-dihexadecanoyl-sn-glycerol 3-phosphate	0	0	0	0	0	0	0	0	0	0	0	0	0	0	0	0	0	0
R_rxn06874_c0	16.0 ATP + 1 N2 + 8.0 Reducedferredoxin + 16.0 H2O = 6.0 H+ + 16.0 Phosphate + 1 H2 + 8.0 Oxidizedferredoxin + 2.0 NH3 + 16.0 ADP	0	0	0	0	0	0	0	0	0	0	0	0	0	0	0	0	0	0
R_rxn01548_c0	1 H+ + 1 Phosphate + 1 Guanosine = 1 Ribose 1-phosphate + 1 Guanine	0	0	0	0	0	0	0	0	0	0	0	0	0	0	0	0	0	0
R_rxn00785_c0	1 Glyceraldehyde3-phosphate + 1 D-fructose-6-phosphate = 1 D-Erythrose4-phosphate + 1 D-Xylulose5-phosphate	0.20229	0.182618	0.109453	0.227794	0.201253	0.0806447	0.109632	0.130461	0.0238985	0.0131813	0.0119493	0.0207414	0.00681037	0.0322046	0.0208282	0.0248516	0.0248516	0.00238985
R_rxn03084_c0	1 ATP + 1 H2O + 1 L-Glutamine + 1 N-Formyl-GAR = 1 H+ + 1 5'-Phosphoribosylformylglycinamidine + 1 Phosphate + 1 L-Glutamate + 1 ADP	0.0947138	0.0855029	0.0512465	0.106655	0.0942284	0.0377585	0.0513307	0.0610827	0.0111895	0.00617158	0.00559474	0.00971128	0.00318867	0.0150784	0.00975192	0.0116357	0.0116357	0.00111895
R_rxn00011_c0	1 H+ + 1 Pyruvate + 1 TPP = 1 2-Hydroxyethyl-ThPP + 1 CO2	0.168329	0.151959	0.091077	0.18955	0.167466	0.0671056	0.0912267	0.108558	0.0198863	0.0109683	0.00994316	0.0172592	0.00566701	0.0267979	0.0173314	0.0206794	0.0206794	0.00198863
R_rxn00292_c0	1 H2O + 1 UDP-N-acetylglucosamine = 1 UDP + 1 N-Acetyl-D-mannosamine	0	0	0	0	0	0	0	0	0	0	0	0	0	0	0	0	0	0
R_rxn05252_c0	1 H+ + 1 ATP + 1 CoA + 1 fa11 = 1 AMP + 1 fa11coa + 1 PPi	0	0	0	0	0	0	0	0	0	0	0	0	0	0	0	0	0	0
R_rxn05466_c0	1 NH3 = 1 NH3	3.55649	3.21062	1.9243	4.00487	3.53826	1.41782	1.92746	2.29365	0.420163	0.231742	0.210082	0.364657	0.119734	0.566193	0.366183	0.436919	0.436919	0.0420163
R_cpd00013_ext_b	1 NH3 = 1 NH3	-3.55649	-3.21062	-1.9243	-4.00487	-3.53826	-1.41782	-1.92746	-2.29365	-0.420163	-0.231742	-0.210082	-0.364657	-0.119734	-0.566193	-0.366183	-0.436919	-0.436919	-0.0420163
R_rxn01513_c0	1 ATP + 1 dTMP = 1 dTDP + 1 ADP	0.00639689	0.0057748	0.00346115	0.00720338	0.00636411	0.00255018	0.00346684	0.00412548	0.000755728	0.000416824	0.000377864	0.000655892	0.00021536	0.00101839	0.000658637	0.000785867	0.000785867	7.55728e-05
R_rxn02476_c0	1 3-phosphoshikimate + 1 Phosphoenolpyruvate = 1 5-O--1-Carboxyvinyl-3-phosphoshikimate + 1 H+ + 1 Phosphate	0.185366	0.167339	0.100295	0.208736	0.184416	0.0738978	0.10046	0.119546	0.0218991	0.0120785	0.0109496	0.0190061	0.0062406	0.0295103	0.0190857	0.0227725	0.0227725	0.00218991
R_rxn02112_c0	1 NAD + 1 BDOH = 1 H+ + 1 NADH + 1 ACTN	0	0	-1.47558	0	0	-9.50959	0	0	0	0	0	0	0	0	0	0	0	-2
R_rxn01870_c0	1 D-fructose-1-phosphate = 1 D-Glyceraldehyde + 1 Glycerone-phosphate	-0.0122644	-0.0110717	-0.00663586	-0.0138106	-0.0122015	-0.0048893	-0.00664676	-0.00790954	-0.00144891	-0.000799152	-0.000724457	-0.0012575	-0.000412898	-0.00195249	-0.00126277	-0.0015067	-0.0015067	-0.000144891
R_rxn04954_c0	1 5-Methyltetrahydrofolate + 1 NAD = 1 H+ + 1 NADH + 1 5-10-Methylenetetrahydrofolate	0	0	0	0	0	0	0	0	0	0	0	0	0	0	0	0	0	0
R_rxn01575_c0	1 2-Oxoglutarate + 1 L-Isoleucine = 1 3MOP + 1 L-Glutamate	-0.128745	-0.116225	-0.0696596	-0.144976	-0.128085	-0.0513253	-0.0697741	-0.0830301	-0.0152099	-0.00838906	-0.00760496	-0.0132006	-0.00433437	-0.0204962	-0.0132558	-0.0158165	-0.0158165	-0.00152099
R_rxn09206_c0	1 CDP-1,2-ditetradecanoylglycerol + 1 L-Serine = 1 phosphatidylserine ditetradecanoyl + 1 H+ + 1 CMP	0	0	0	0	0	0	0	0	0	0	0	0	0	0	0	0	0	0
R_rxn00781_c0	1 Glyceraldehyde3-phosphate + 1 Phosphate + 1 NAD = 1 NADH + 1 1,3-Bisphospho-D-glycerate	18.3769	18.5347	19.1218	18.1723	18.3852	19.3529	0	0	-0.191753	-0.105762	-0.0958764	-0.166421	-0.0546438	-0.258397	-0.167117	0	0	-0.0191753
R_rxn00973_c0	1 Citrate = 1 Isocitrate	1000	1000	1000	1000	1000	1000	1000	1000	-999.943	-999.969	1000	-999.951	-999.984	-999.924	-999.951	1000	1000	-999.994
R_rxn01985_c0	1 H+ + 1 Deoxyinosine + 1 Phosphate = 1 HYXN + 1 deoxyribose-1-phosphate	0	0	0	0	0	0	0	0	0	0	0	0	0	0	0	0	0	0
R_rxn00775_c0	1 H2O + 1 ADPribose = 1 AMP + 1 ribose-5-phosphate	0	0	0	0	0	0	0	0	0	0	0	0	0	0	0	0	0	0
R_rxn00364_c0	1 ATP + 1 CMP = 1 CDP + 1 ADP	0.490258	0.442581	0.265262	0.552067	0.487745	0.195446	0.265698	0.316177	0.0579191	0.0319454	0.0289595	0.0502676	0.0165052	0.0780491	0.0504779	0.0602289	0.0602289	0.00579191
R_rxn01025_c0	1 H+ + 1 5-Methylcytosine + 1 H2O = 1 Thymine + 1 NH3	0	0	0	0	0	0	0	0	0	0	0	0	0	0	0	0	0	0
R_rxn02011_c0	1 ATP + 1 UDP-N-acetylmuramoyl-L-alanyl-D-glutamate + 1 meso-2,6-Diaminopimelate = 1 H+ + 1 Phosphate + 1 UDP-N-acetylmuramoyl-L-alanyl-D-gamma-glutamyl-meso-2-6-diaminopimelate + 1 ADP	0.000859822	0.000776204	0.000465221	0.000968223	0.000855415	0.000342775	0.000465986	0.000554515	0.000101579	5.60262e-05	5.07896e-05	8.816e-05	2.89471e-05	0.000136884	8.85289e-05	0.00010563	0.00010563	1.01579e-05
R_rxn10227_c0	1 CDP-1,2-dianteisoheptadecanoylglycerol + 1 L-Serine = 1 Dianteisoheptadecanoylphosphatidylserine + 1 H+ + 1 CMP	0.00408813	0.00369056	0.00221195	0.00460354	0.00406718	0.00162977	0.00221559	0.00263651	0.000482971	0.000266384	0.000241486	0.000419168	0.000137633	0.000650831	0.000420922	0.000502232	0.000502232	4.82971e-05
R_rxn00917_c0	1 ATP + 1 XMP + 1 H2O + 1 L-Glutamine = 1 H+ + 1 AMP + 1 GMP + 1 PPi + 1 L-Glutamate	0.0454832	0.04106	0.0246095	0.0512175	0.0452501	0.0181323	0.0246499	0.029333	0.00537338	0.0029637	0.00268669	0.00466352	0.00153125	0.00724093	0.00468304	0.00558767	0.00558767	0.000537338
R_rxn09113_c0	1 CDP-1,2-dioctadecanoylglycerol + 1 Glycerol-3-phosphate = 1 Phosphatidylglycerophosphate dioctadecanoyl + 1 CMP	0.0122644	0.0110717	0.00663586	0.0138106	0.0122015	0.0048893	0.00664676	0.00790954	0.00144891	0.000799152	0.000724457	0.0012575	0.000412898	0.00195249	0.00126277	0.0015067	0.0015067	0.000144891
R_rxn03536_c0	1 ATP + 1 Adenosyl cobinamide = 1 H+ + 1 Adenosyl cobinamide phosphate + 1 ADP	0.00377988	0.00341229	0.00204517	0.00425643	0.00376051	0.00150688	0.00204853	0.00243772	0.000446555	0.000246298	0.000223278	0.000387562	0.000127255	0.000601758	0.000389184	0.000464364	0.000464364	4.46555e-05
R_rxn01044_c0	1 Xylose = 1 D-Lyxulose	0	0	0	0	0	0	0	0	0	0	0	0	0	0	0	0	0	0
R_rxn12846_c0	1 Gly-Phe + 1 H2O = 1 L-Phenylalanine + 1 Glycine	0	0	0	0	0	0	0	0	0	0	0	0	0	0	0	0	0	0
R_rxn01297_c0	1 HYXN + 1 H2O + 1 NAD = 1 H+ + 1 XAN + 1 NADH	0	0	0	0	0	0	0	0	0	0	0	0	0	0	0	0	0	0
R_rxn08547_c0	1 Glycerol-3-phosphate + 1 Myristoyl-ACP = 1 1-tetradecanoyl-sn-glycerol 3-phosphate + 1 ACP	0	0	0	0	0	0	0	0	0	0	0	0	0	0	0	0	0	0
R_rxn10283_c0	1 UDP-glucose + 1 1,2-Diisoheptadecanoyl-sn-glycerol = 1 Monoglucosyl-1,2 diisoheptadecanoylglycerol + 1 UDP	0.00343929	0.00310482	0.00186088	0.00387289	0.00342166	0.0013711	0.00186394	0.00221806	0.000406317	0.000224105	0.000203159	0.00035264	0.000115788	0.000547535	0.000354116	0.000422521	0.000422521	4.06317e-05
R_rxn05201_c0	1 HYXN + 1 H+ = 1 HYXN + 1 H+	0	0	0	0	0	0	0	0	0	0	0	0	0	0	0	0	0	0
R_rxn10233_c0	1 Dianteisoheptadecanoylphosphatidylserine + 2.0 H+ = 1 Dianteisoheptadecanoylphosphatidylethanolamine + 1 CO2	0.00408813	0.00369056	0.00221195	0.00460354	0.00406718	0.00162977	0.00221559	0.00263651	0.000482971	0.000266384	0.000241486	0.000419168	0.000137633	0.000650831	0.000420922	0.000502232	0.000502232	4.82971e-05
R_rxn02789_c0	1 2-Isopropylmalate = 1 2-Isopropylmaleate + 1 H2O	0.205001	0.185065	0.110919	0.230847	0.203951	0.0817255	0.111102	0.132209	0.0242188	0.0133579	0.0121094	0.0210194	0.00690165	0.0326362	0.0211073	0.0251847	0.0251847	0.00242188
R_rxn08180_c0	1 Dethiobiotin + 1 S-Adenosyl-L-methionine + 1 S = 1 5'-Deoxyadenosine + 1 H+ + 1 L-Methionine + 1 BIOT	0	0	0	0	0	0	0	0	0	0	0	0	0	0	0	0	0	0
R_rxn01331_c0	1 D-Erythrose4-phosphate + 1 H2O + 1 NAD = 2.0 H+ + 1 NADH + 1 4-Phosphoerythronate	0	0	0	0	0	0	0	0	0	0	0	0	0	0	0	0	0	0
R_rxn10042_c0	4.0 H+ + 1 Phosphate + 1 ADP = 1 ATP + 3.0 H+ + 1 H2O	0	0	0	4.10364	0	0	0.346512	4.21202	4.9023	2.70387	2.45115	4.25467	1.39701	6.60612	4.27248	4.8984	4.8984	4.49023
R_rxn00800_c0	1 Adenylosuccinate = 1 AMP + 1 Fumarate	0.0844643	0.0762502	0.0457009	0.0951131	0.0840314	0.0336724	0.045776	0.0544727	0.00997861	0.00550372	0.0049893	0.00866037	0.00284361	0.0134467	0.00869661	0.0103766	0.0103766	0.000997861
R_rxn01343_c0	1 Sedoheptulose7-phosphate + 1 ATP = 1 ADP + 1 Sedoheptulose 1,7-bisphosphate	9.55144	0	0	9.49489	9.55374	0	9.7569	0	0	0	0	0	0	0	0	0	0	0
R_rxn01520_c0	1 dUMP + 1 5-10-Methylenetetrahydrofolate = 1 Dihydrofolate + 1 dTMP	0.00639689	0.0057748	0.00346115	0.00720338	0.00636411	0.00255018	0.00346684	0.00412548	0.000755728	0.000416824	0.000377864	0.000655892	0.00021536	0.00101839	0.000658637	0.000785867	0.000785867	7.55728e-05
R_rxn05234_c0	1 GTP + 1 trdrd = 1 dGTP + 1 trdox + 1 H2O	0.00639689	0.0057748	0.00346115	0.00720338	0.00636411	0.00255018	0.00346684	0.00412548	0.000755728	0.000416824	0.000377864	0.000655892	0.00021536	0.00101839	0.000658637	0.000785867	0.000785867	7.55728e-05
R_rxn08783_c0	1 Ubiquinone-8 + 1 D-Lactate = 1 Ubiquinol-8 + 1 Pyruvate	0	0	0	0	0	0	0	0	0	0	0	0	0	0	0	0	0	0
R_rxn10286_c0	1 UDP-glucose + 1 1,2-Diisopentadecanoyl-sn-glycerol = 1 Monoglucosyl-1,2 diisopentadecanoylglycerol + 1 UDP	0	0	0	0	0	0	0	0	0	0	0	0	0	0	0	0	0	0
R_rxn00322_c0	1 H+ + 1 L-Lysine = 1 CO2 + 1 Cadaverine	0	0	0	0	0	0	0	0	0	0	0	0	0	0	0	0	0	0
R_rxn10342_c0	2.0 Diisohexadecanoylphosphatidylglycerol = 1 Isohexadecanoylcardiolipin (B. subtilis) + 1 Glycerol	0	0	0	0	0	0	0	0	0	0	0	0	0	0	0	0	0	0
R_rxn05426_c0	1 12-methyl-3-oxo-tridecanoyl-ACP + 1 H+ + 1 NADPH = 1 NADP + 1 12-methyl-3-hydroxy-tridecanoyl-ACP	0	0	0	0	0	0	0	0	0	0	0	0	0	0	0	0	0	0
R_rxn02314_c0	1 ATP + 1 D-Tagatose 6-phosphate = 1 ADP + 1 D-Tagatose 1,6-biphosphate	0	0	0	0	0	0	0	0	0	0	0	0	0	0	0	0	0	0
R_rxn00179_c0	1 H+ + 1 ATP + 1 L-Glutamate = 1 L-Glutamyl 5-phosphate + 1 ADP	0.0766617	0.0692064	0.0414791	0.0863268	0.0762688	0.0305619	0.0415473	0.0494406	0.00905681	0.0049953	0.00452841	0.00786035	0.00258092	0.0122046	0.00789324	0.009418	0.009418	0.000905681
R_rxn05307_c0	1 H+ + 1 L-Serine = 1 H+ + 1 L-Serine	0	0	0	0	0	0	0	0	0	0	0	0	0	0	0	0	0	0
R_rxn01465_c0	1 H2O + 1 S-Dihydroorotate = 1 H+ + 1 N-Carbamoyl-L-aspartate	-0.0462278	-0.0417321	-0.0250123	-0.0520559	-0.0459908	-0.0184291	-0.0250534	-0.0298132	-0.00546135	-0.00301222	-0.00273067	-0.00473987	-0.00155632	-0.00735947	-0.0047597	-0.00567915	-0.00567915	-0.000546135
R_rxn05364_c0	1 H+ + 1 6-methyl-3-oxo-octanoyl-ACP + 1 NADPH = 1 6-methyl-3-hydroxy-octanoyl-ACP + 1 NADP	0.0395836	0.0357341	0.0214174	0.0445741	0.0393807	0.0157803	0.0214526	0.0255282	0.00467641	0.00257928	0.0023382	0.00405862	0.00133264	0.00630171	0.00407561	0.0048629	0.0048629	0.000467641
R_rxn00863_c0	1 L-Histidinal + 1 H2O + 1 NAD = 2.0 H+ + 1 L-Histidine + 1 NADH	0.0390136	0.0352196	0.021109	0.0439322	0.0388137	0.0155531	0.0211437	0.0251606	0.00460907	0.00254214	0.00230453	0.00400018	0.00131345	0.00621097	0.00401692	0.00479287	0.00479287	0.000460907
R_rxn10279_c0	1 UDP-glucose + 1 Monoglucosyl-1,2 diisohexadecanoylglycerol = 1 Diglucosyl-1,2 diisohexadecanoylglycerol + 1 UDP	0	0	0	0	0	0	0	0	0	0	0	0	0	0	0	0	0	0
R_rxn00223_c0	1 D-Glucose = 1 D-Fructose	0	0	0	0	0	0	0	0	0	0	0	0	0	0	0	0	0	0
R_rxn03150_c0	1 H2O + 1 alpha-Ribazole 5'-phosphate = 1 H+ + 1 alpha-Ribazole + 1 Phosphate	0.00377988	0.00341229	0.00204517	0.00425643	0.00376051	0.00150688	0.00204853	0.00243772	0.000446555	0.000246298	0.000223278	0.000387562	0.000127255	0.000601758	0.000389184	0.000464364	0.000464364	4.46555e-05
R_rxn01800_c0	1 H+ + 1 H2O + 1 Deoxycytidine = 1 Deoxyuridine + 1 NH3	0	0	0	0	0	0	0	0	0	0	0	0	0	0	0	0	0	0
R_rxn10217_c0	1 1-isopentadecanoyl-sn-glycerol 3-phosphate + 1 fa3coa = 1 1,2-diisopentadecanoyl-sn-glycerol 3-phosphate + 1 CoA	0	0	0	0	0	0	0	0	0	0	0	0	0	0	0	0	0	0
R_rxn09449_c0	1 ocdca + 1 H+ + 1 ATP + 1 CoA = 1 AMP + 1 PPi + 1 strcoa	0.0395836	0.0357341	0.0214174	0.0445741	0.0393807	0.0157803	0.0214526	0.0255282	0.00467641	0.00257928	0.0023382	0.00405862	0.00133264	0.00630171	0.00407561	0.0048629	0.0048629	0.000467641
R_rxn10168_c0	1 ATP + 1 H2O + 1 K+ = 1 H+ + 1 Phosphate + 1 ADP + 1 K+	0	0	0	0	0	0	0	0	0	0	0	0	0	0	0	0	0	0
R_cpd00205_ext_b	1 K+ = 1 K+	-0.00377988	-0.00341229	-0.00204517	-0.00425643	-0.00376051	-0.00150688	-0.00204853	-0.00243772	-0.000446555	-0.000246298	-0.000223278	-0.000387562	-0.000127255	-0.000601758	-0.000389184	-0.000464364	-0.000464364	-4.46555e-05
R_rxn03436_c0	1 2-Aceto-2-hydroxybutanoate = 1 (R)-3-Hydroxy-3-methyl-2-oxopentanoate	0.168329	0.151959	0.091077	0.18955	0.167466	0.0671056	0.0912267	0.108558	0.0198863	0.0109683	0.00994316	0.0172592	0.00566701	0.0267979	0.0173314	0.0206794	0.0206794	0.00198863
R_rxn08756_c0	1 H+ + 1 NADH + 1 1-Hydroxy-2-methyl-2-butenyl 4-diphosphate = 1 Isopentenyldiphosphate + 1 H2O + 1 NAD	0.0615166	0.0555341	0.0332846	0.0692723	0.0612013	0.0245241	0.0333393	0.0396732	0.00726757	0.00400844	0.00363378	0.00630747	0.00207104	0.00979345	0.00633387	0.0075574	0.0075574	0.000726757
R_rxn00423_c0	1 L-Serine + 1 Acetyl-CoA = 1 CoA + 1 O-Acetyl-L-serine	0	0	0	0	0	0	0	0	0	0	0	0	0	0	0	0	0	0
R_rxn05430_c0	1 H+ + 1 14-methyl-3-oxo-pentadecanoyl-ACP + 1 NADPH = 1 NADP + 1 14-methyl-3-hydroxy-pentadecanoyl-ACP	0	0	0	0	0	0	0	0	0	0	0	0	0	0	0	0	0	0
R_rxn10272_c0	1 UDP-glucose + 1 Monoglucosyl-1,2 dimyristoylglycerol = 1 Diglucosyl-1,2 dimyristoylglycerol + 1 UDP	0	0	0	0	0	0	0	0	0	0	0	0	0	0	0	0	0	0
R_rxn03248_c0	1 Hexanoyl-CoA + 1 Acetyl-CoA = 1 3-Oxooctanoyl-CoA + 1 CoA	0	0	0	0	0	0	0	0	0	0	0	0	0	0	0	0	0	0
R_rxn08307_c0	1 1,2-ditetradecanoyl-sn-glycerol 3-phosphate + 1 CTP = 1 CDP-1,2-ditetradecanoylglycerol + 1 PPi	0	0	0	0	0	0	0	0	0	0	0	0	0	0	0	0	0	0
R_rxn02201_c0	1 2-Amino-4-hydroxy-6-hydroxymethyl-7-8-dihydropteridinediphosphate + 1 ABEE = 1 Dihydropteroate + 1 PPi	0	0	0	0	0	0	0	0	0	0	0	0	0	0	0	0	0	0
R_rxn05555_c0	1 ATP + 1 H2O + 1 Fe2+ = 1 H+ + 1 Phosphate + 1 Fe2+ + 1 ADP	0.00755977	0.00682458	0.00409034	0.00851286	0.00752102	0.00301377	0.00409706	0.00487544	0.000893111	0.000492597	0.000446555	0.000775125	0.00025451	0.00120352	0.000778369	0.000928728	0.000928728	8.93111e-05
R_cpd10515_ext_b	1 Fe2+ = 1 Fe2+	-0.00755977	-0.00682458	-0.00409034	-0.00851286	-0.00752102	-0.00301377	-0.00409706	-0.00487544	-0.000893111	-0.000492597	-0.000446555	-0.000775125	-0.00025451	-0.00120352	-0.000778369	-0.000928728	-0.000928728	-8.93111e-05
R_rxn00742_c0	1 H2O + 1 Cystathionine = 1 L-Cysteine + 1 NH3 + 1 2-Oxobutyrate	0.042234	0.0381268	0.0228514	0.0475586	0.0420175	0.0168369	0.022889	0.0272375	0.00498952	0.00275198	0.00249476	0.00433037	0.00142187	0.00672366	0.0043485	0.0051885	0.0051885	0.000498952
R_rxn02159_c0	1 L-Histidinol + 1 NAD = 1 L-Histidinal + 1 H+ + 1 NADH	0.0390136	0.0352196	0.021109	0.0439322	0.0388137	0.0155531	0.0211437	0.0251606	0.00460907	0.00254214	0.00230453	0.00400018	0.00131345	0.00621097	0.00401692	0.00479287	0.00479287	0.000460907
R_rxn00727_c0	1 L-Glutamine + 1 Chorismate = 1 H+ + 1 Pyruvate + 1 L-Glutamate + 1 Anthranilate	0.025944	0.023421	0.0140375	0	0.0258111	0	0.0140605	0.0167318	0.00306503	0.00169052	0.00153251	0.00266012	0	0.00413029	0.00267125	0.00318726	0.00318726	0.000306503
R_rxn03891_c0	1 all-trans-Hexaprenyl diphosphate + 1 Isopentenyldiphosphate = 1 all-trans-Heptaprenyl diphosphate + 1 PPi	0.00755977	0.00682458	0.00409034	0.00851286	0.00752102	0.00301377	0.00409706	0.00487544	0.000893111	0.000492597	0.000446555	0.000775125	0.00025451	0.00120352	0.000778369	0.000928728	0.000928728	8.93111e-05
R_rxn05413_c0	1 H+ + 1 Malonyl-acyl-carrierprotein- + 1 4-methyl-pentanoyl-ACP = 1 6-methyl-3-oxo-heptanoyl-ACP + 1 ACP + 1 CO2	0	0	0	0	0	0	0	0	0	0	0	0	0	0	0	0	0	0
R_rxn04385_c0	1 H+ + 1 L-Threonine phosphate = 1 CO2 + 1 (R)-1-Aminopropan-2-yl phosphate	0	0	0	0	0	0	0	0	0	0	0	0	0	0	0	0	0	0
R_rxn05348_c0	1 Decanoyl-ACP + 1 H+ + 1 Malonyl-acyl-carrierprotein- = 1 3-oxododecanoyl-acp + 1 ACP + 1 CO2	0	0	0	0	0	0	0	0	0	0	0	0	0	0	0	0	0	0
R_rxn10299_c0	1 Myristoyllipoteichoic acid (n-24), linked, unsubstituted + 24.0 UDP-glucose = 1 Myristoyllipoteichoic acid (n-24), linked, glucose substituted + 24.0 UDP	0	0	0	0	0	0	0	0	0	0	0	0	0	0	0	0	0	0
R_rxn01300_c0	1 ATP + 1 L-Homoserine = 1 O-Phospho-L-homoserine + 1 ADP	0.918824	0.829469	0.497145	1.03466	0.914115	0.366297	0.497962	0.592567	0.10855	0.0598708	0.0542749	0.0942096	0.0309335	0.146277	0.0946039	0.112879	0.112879	0.010855
R_rxn10264_c0	1 CDP-1,2-diisohexadecanoylglycerol + 1 Glycerol-3-phosphate = 1 Diisohexadecanoylphosphatidylglycerophosphate + 1 CMP	0	0	0	0	0	0	0	0	0	0	0	0	0	0	0	0	0	0
R_rxn10208_c0	1 Glycerol-3-phosphate + 1 fa3coa = 1 1-isopentadecanoyl-sn-glycerol 3-phosphate + 1 CoA	0	0	0	0	0	0	0	0	0	0	0	0	0	0	0	0	0	0
R_rxn00715_c0	1 Uridine + 1 ITP = 1 UMP + 1 IDP	0	0	0	0	0	0	0	0	0	0	0	0	0	0	0	0	0	0
R_rxn01647_c0	1 Nicotinate D-ribonucleoside + 1 Phosphate = 1 Ribose 1-phosphate + 1 Niacin	0	0	0	0	0	0	0	0	0	0	0	0	0	0	0	0	0	0
R_rxn12642_c0	1 H2O + 1 Ala-His = 1 L-Histidine + 1 L-Alanine	0	0	0	0	0	0	0	0	0	0	0	0	0	0	0	0	0	0
R_rxn05198_c0	1 Cytidine + 1 H+ = 1 Cytidine + 1 H+	0	0	0	0	0	0	0	0	0	0	0	0	0	0	0	0	0	0
R_rxn05247_c0	1 H+ + 1 ATP + 1 fa1 + 1 CoA = 1 AMP + 1 PPi + 1 fa1coa	0	0	0	0	0	0	0	0	0	0	0	0	0	0	0	0	0	0
R_rxn07845_c0	1 D-Glucarate = 1 H2O + 1 2-Dehydro-3-deoxy-D-glucarate	0	0	0	0	0	0	0	0	0	0	0	0	0	0	0	0	0	0
R_rxn09688_c0	1 H+ + 1 Deoxyguanosine = 1 H+ + 1 Deoxyguanosine	0	0	0	0	0	0	0	0	0	0	0	0	0	0	0	0	0	0
R_rxn05594_c0	1 ATP + 1 Isethionate + 1 H2O = 1 H+ + 1 Isethionate + 1 Phosphate + 1 ADP	0	0	0	0	0	0	0	0	0	0	0	0	0	0	0	0	0	0
R_rxn02504_c0	1 Dihydroneopterin = 1 6-hydroxymethyl dihydropterin + 1 Glycolaldehyde	0.0113397	0.0102369	0.00613551	0.0127693	0.0112815	0.00452065	0.00614559	0.00731316	0.00133967	0.000738895	0.000669833	0.00116269	0.000381765	0.00180527	0.00116755	0.00139309	0.00139309	0.000133967
R_rxn01748_c0	1 Allantoin + 1 H2O = 1 H+ + 1 Allantoate	0	0	0	0	0	0	0	0	0	0	0	0	0	0	0	0	0	0
R_rxn05493_c0	1 H+ + 1 2-Oxoglutarate = 1 H+ + 1 2-Oxoglutarate	0	-0.615487	0	0	0	0	0	0	0	0	0	0	0	0	0	0	0	0
R_cpd00024_ext_b	1 2-Oxoglutarate = 1 2-Oxoglutarate	0	0.615487	0	0	0	0	0	0	0	0	0	0	0	0	0	0	0	0
R_rxn10473_c0	1 Cl- = 1 Cl-	0.00377988	0.00341229	0.00204517	0.00425643	0.00376051	0.00150688	0.00204853	0.00243772	0.000446555	0.000246298	0.000223278	0.000387562	0.000127255	0.000601758	0.000389184	0.000464364	0.000464364	4.46555e-05
R_cpd00099_ext_b	1 Cl- = 1 Cl-	-0.00377988	-0.00341229	-0.00204517	-0.00425643	-0.00376051	-0.00150688	-0.00204853	-0.00243772	-0.000446555	-0.000246298	-0.000223278	-0.000387562	-0.000127255	-0.000601758	-0.000389184	-0.000464364	-0.000464364	-4.46555e-05
R_rxn05223_c0	1 ATP + 1 H2O + 1 BIOT = 1 H+ + 1 Phosphate + 1 BIOT + 1 ADP	0	0	0	0	0	0	0	0	0	0	0	0	0	0	0	0	0	0
R_rxn05534_c0	1 ATP + 1 H2O + 1 gly-glu-L = 1 H+ + 1 Phosphate + 1 gly-glu-L + 1 ADP	0	0	0	0	0	0	0	0	0	0	0	0	0	0	0	0	0	0
R_rxn05618_c0	1 H+ + 1 Mn2+ = 1 H+ + 1 Mn2+	0.00377988	0.00341229	0.00204517	0.00425643	0.00376051	0.00150688	0.00204853	0.00243772	0.000446555	0.000246298	0.000223278	0.000387562	0.000127255	0.000601758	0.000389184	0.000464364	0.000464364	4.46555e-05
R_cpd00030_ext_b	1 Mn2+ = 1 Mn2+	-0.00377988	-0.00341229	-0.00204517	-0.00425643	-0.00376051	-0.00150688	-0.00204853	-0.00243772	-0.000446555	-0.000246298	-0.000223278	-0.000387562	-0.000127255	-0.000601758	-0.000389184	-0.000464364	-0.000464364	-4.46555e-05
R_rxn01358_c0	1 Inosine + 1 H+ + 1 Phosphate = 1 Ribose 1-phosphate + 1 HYXN	0	0	0	0	0	0	0	0	0	0	0	0	0	0	0	0	0	0
R_rxn00692_c0	1 H2O + 1 5-10-Methylenetetrahydrofolate + 1 Glycine = 1 Tetrahydrofolate + 1 L-Serine	0.183633	0.165775	0.099358	0.206785	0.182692	0.073207	0.0995213	0.118429	0.0216944	0.0119656	0.0108472	0.0188285	0.00618227	0.0292345	0.0189073	0.0225596	0.0225596	0.00216944
R_rxn09108_c0	1 Glycerol-3-phosphate + 1 CDP-1,2-didodecanoylglycerol = 1 Phosphatidylglycerophosphate didodecanoyl + 1 CMP	0	0	0	0	0	0	0	0	0	0	0	0	0	0	0	0	0	0
R_rxn03068_c0	1 NADP + 1 2,3-Dihydroxy-isovalerate = 1 H+ + 1 2-Oxo-3-hydroxyisovalerate + 1 NADPH	-0.359057	-0.324139	-0.194274	-0.404325	-0.357217	-0.143141	-0.194593	-0.231563	-0.042419	-0.0233963	-0.0212095	-0.0368152	-0.0120882	-0.0571619	-0.0369692	-0.0441107	-0.0441107	-0.0042419
R_rxn00566_c0	1 L-Cysteine + 1 H2O = 1 Pyruvate + 1 NH3 + 1 H2S	0	0	0	0	0	0	0	0	0	0	0	0	0	0	0	0	0	0
R_rxn08299_c0	1 ATP + 1 1,2-Diacyl-sn-glycerol dioctadecanoyl = 1 1,2-dioctadecanoyl-sn-glycerol 3-phosphate + 1 ADP	-0.00343929	-0.00310482	-0.00186088	-0.00387289	-0.00342166	-0.0013711	-0.00186394	-0.00221806	-0.000406317	-0.000224105	-0.000203159	-0.00035264	-0.000115788	-0.000547535	-0.000354116	-0.000422521	-0.000422521	-4.06317e-05
R_rxn00002_c0	3.0 H+ + 1 Allophanate + 1 H2O = 2.0 NH3 + 2.0 CO2	0	0	0	0	0	0	0	0	0	0	0	0	0	0	0	0	0	0
R_rxn00654_c0	2.0 H+ + 1 H2O + 1 3-Ureidopropanoate = 1 beta-Alanine + 1 NH3 + 1 CO2	0.00755977	0.00682458	0.00409034	0.00851286	0.00752102	0.00301377	0.00409706	0.00487544	0.000893111	0.000492597	0.000446555	0.000775125	0.00025451	0.00120352	0.000778369	0.000928728	0.000928728	8.93111e-05
R_rxn09988_c0	2.0 H2O + 1 Arabinan = 3.0 L-Arabinose	0	0	0	0	0	0	0	0	0	0	0	0	0	0	0	0	0	0
R_rxn00505_c0	1 NAD + 1 Isocitrate = 1 CO2 + 1 NADH + 1 2-Oxoglutarate	0.478588	1.04753	0.258948	0.538926	0.476136	0.190793	0.259374	0.308651	0.0565404	0.031185	0.0282702	0.049071	0.0161123	0.0761913	0.0492764	0.0587952	0.0587952	0.00565404
R_rxn12634_c0	1 H2O + 1 gly-glu-L = 1 L-Glutamate + 1 Glycine	0	0	0	0	0	0	0	0	0	0	0	0	0	0	0	0	0	0
R_rxn10261_c0	1 Glycerol-3-phosphate + 1 CDP-1,2-diisotetradecanoylglycerol = 1 Diisotetradecanoylphosphatidylglycerophosphate + 1 CMP	0	0	0	0	0	0	0	0	0	0	0	0	0	0	0	0	0	0
R_rxn10232_c0	2.0 H+ + 1 Diisoheptadecanoylphosphatidylserine = 1 Diisoheptadecanoylphosphatidylethanolamine + 1 CO2	0.00408813	0.00369056	0.00221195	0.00460354	0.00406718	0.00162977	0.00221559	0.00263651	0.000482971	0.000266384	0.000241486	0.000419168	0.000137633	0.000650831	0.000420922	0.000502232	0.000502232	4.82971e-05
R_rxn00300_c0	3.0 H2O + 1 GTP = 1 2,5-Diamino-6-(5'-phosphoribosylamino)-4-pyrimidineone + 1 H+ + 1 PPi + 1 Formate	0.00755977	0.00682458	0.00409034	0.00851286	0.00752102	0.00301377	0.00409706	0.00487544	0.000893111	0.000492597	0.000446555	0.000775125	0.00025451	0.00120352	0.000778369	0.000928728	0.000928728	8.93111e-05
R_rxn00907_c0	1 NADP + 1 5-10-Methylenetetrahydrofolate = 1 5-10-Methenyltetrahydrofolate + 1 NADPH	-6.59801	-0.244215	-0.146371	-0.304629	-5.74414	-1.51158	-8.15627	-7.80599	-4.69138	-2.27832	-4.84569	-4.73215	-0.210481	-4.58411	-4.73103	-4.67907	-4.67907	-4.96914
R_rxn05619_c0	1 Molybdate + 1 ATP + 1 H2O = 1 Molybdate + 1 H+ + 1 Phosphate + 1 ADP	0	0	0	0	0	0	0	0	0	0	0	0	0	0	0	0	0	0
R_rxn05410_c0	1 H+ + 1 4-methyl-3-oxo-pentanoyl-ACP + 1 NADPH = 1 NADP + 1 4-methyl-3-hydroxy-pentanoyl-ACP	0	0	0	0	0	0	0	0	0	0	0	0	0	0	0	0	0	0
R_rxn01269_c0	1 Prephenate + 1 NADP = 1 p-hydroxyphenylpyruvate + 1 CO2 + 1 NADPH	0	0	0	0	0	0	0	0	0	0	0	0	0	0	0	0	0	0
R_rxn04048_c0	1 Cobalt-precorrin 4 + 1 S-Adenosyl-L-methionine = 1 S-Adenosyl-homocysteine + 1 Cobalt-precorrin 5	0	0	0	0	0	0	0	0	0	0	0	0	0	0	0	0	0	0
R_rxn06673_c0	1 Carboxybiotin-carboxyl-carrier protein + 1 Acetyl-CoA = 1 Holo-[carboxylase] + 1 Malonyl-CoA	0.791672	0.714683	0.428348	0.891482	0.787615	0.315607	0.429052	0.510565	0.0935281	0.0515856	0.0467641	0.0811724	0.0266527	0.126034	0.0815121	0.097258	0.097258	0.00935281
R_rxn00790_c0	1 H2O + 1 L-Glutamine + 1 PRPP = 1 5-Phosphoribosylamine + 1 PPi + 1 L-Glutamate	0.0947138	0.0855029	0.0512465	0.106655	0.0942284	0.0377585	0.0513307	0.0610827	0.0111895	0.00617158	0.00559474	0.00971128	0.00318867	0.0150784	0.00975192	0.0116357	0.0116357	0.00111895
R_rxn08296_c0	1 1,2-Diacyl-sn-glycerol ditetradec-7-enoyl + 1 ATP = 1 ADP + 1 1,2-ditetradec-7-enoyl-sn-glycerol 3-phosphate	0	0	0	0	0	0	0	0	0	0	0	0	0	0	0	0	0	0
R_rxn05569_c0	1 GLUM + 1 Phosphoenolpyruvate = 1 Pyruvate + 1 D-Glucosamine phosphate	0	0	0	0	0	0	0	0	0	0	0	0	0	0	0	0	0	0
R_rxn05574_c0	1 H+ + 1 Glucuronate = 1 H+ + 1 Glucuronate	0	0	0	0	0	0	0	0	0	0	0	0	0	0	0	0	0	0
R_rxn00060_c0	1 H2O + 4.0 Porphobilinogen = 4.0 NH3 + 1 Hydroxymethylbilane	0.00377988	0.00341229	0.00204517	0.00425643	0.00376051	0.00150688	0.00204853	0.00243772	0.000446555	0.000246298	0.000223278	0.000387562	0.000127255	0.000601758	0.000389184	0.000464364	0.000464364	4.46555e-05
R_rxn09202_c0	2.0 H+ + 1 phosphatidylserine dioctadecanoyl = 1 phosphatidylethanolamine dioctadecanoyl + 1 CO2	0.00408813	0.00369056	0.00221195	0.00460354	0.00406718	0.00162977	0.00221559	0.00263651	0.000482971	0.000266384	0.000241486	0.000419168	0.000137633	0.000650831	0.000420922	0.000502232	0.000502232	4.82971e-05
R_rxn02473_c0	1 D-erythro-imidazol-glycerol-phosphate = 1 imidazole acetol-phosphate + 1 H2O	0.0390136	0.0352196	0.021109	0.0439322	0.0388137	0.0155531	0.0211437	0.0251606	0.00460907	0.00254214	0.00230453	0.00400018	0.00131345	0.00621097	0.00401692	0.00479287	0.00479287	0.000460907
R_rxn00834_c0	1 IMP + 1 H2O + 1 NAD = 1 H+ + 1 XMP + 1 NADH	0.0454832	0.04106	0.0246095	0.0512175	0.0452501	0.0181323	0.0246499	0.029333	0.00537338	0.0029637	0.00268669	0.00466352	0.00153125	0.00724093	0.00468304	0.00558767	0.00558767	0.000537338
R_rxn05293_c0	1 H+ + 1 2-C-methyl-D-erythritol2-4-cyclodiphosphate + 1 NADH = 1 H2O + 1 NAD + 1 1-Hydroxy-2-methyl-2-butenyl 4-diphosphate	0.0699362	0.0631349	0.0378402	0.0787534	0.0695777	0.0278807	0.0379023	0.0451032	0.00826226	0.00455706	0.00413113	0.00717076	0.0023545	0.0111338	0.00720077	0.00859176	0.00859176	0.000826226
R_rxn12639_c0	1 H2O + 1 Ala-Gln = 1 L-Glutamine + 1 L-Alanine	0	0	0	0	0	0	0	0	0	0	0	0	0	0	0	0	0	0
R_rxn00926_c0	1 H+ + 1 Adenine + 1 H2O = 1 HYXN + 1 NH3	0	0	0	0	0	0	0	0	0	0	0	0	0	0	0	0	0	0
R_rxn03080_c0	1 4--1-D-Ribitylamino-5-aminouracil + 1 3-4-dihydroxy-2-butanone4-phosphate = 1 6-7-Dimethyl-8--1-D-ribityllumazine + 1 H+ + 2.0 H2O + 1 Phosphate	0.0151195	0.0136492	0.00818068	0.0170257	0.015042	0.00602753	0.00819413	0.00975088	0.00178622	0.000985194	0.000893111	0.00155025	0.00050902	0.00240703	0.00155674	0.00185746	0.00185746	0.000178622
R_rxn05150_c0	1 ATP + 1 H2O + 1 Zn2+ = 1 H+ + 1 Phosphate + 1 ADP + 1 Zn2+	0.00377988	0.00341229	0.00204517	0.00425643	0.00376051	0.00150688	0.00204853	0.00243772	0.000446555	0.000246298	0.000223278	0.000387562	0.000127255	0.000601758	0.000389184	0.000464364	0.000464364	4.46555e-05
R_cpd00034_ext_b	1 Zn2+ = 1 Zn2+	-0.00377988	-0.00341229	-0.00204517	-0.00425643	-0.00376051	-0.00150688	-0.00204853	-0.00243772	-0.000446555	-0.000246298	-0.000223278	-0.000387562	-0.000127255	-0.000601758	-0.000389184	-0.000464364	-0.000464364	-4.46555e-05
R_rxn01761_c0	1 L-Rhamnose = 1 L-Rhamnulose	0	0	0	0	0	0	0	0	0	0	0	0	0	0	0	0	0	0
R_rxn05199_c0	1 Uridine + 1 H+ = 1 Uridine + 1 H+	0	0	0	0	0	0	0	0	0	0	0	0	0	0	0	0	0	0
R_rxn01639_c0	1 N-Formimino-L-glutamate + 1 H2O = 1 Formamide + 1 L-Glutamate	0	0	0	0	0	0	0	0	0	0	0	0	0	0	0	0	0	0
R_rxn05040_c0	1 D-Ribulose5-phosphate = 1 H+ + 1 3-4-dihydroxy-2-butanone4-phosphate + 1 Formate	0.0151195	0.0136492	0.00818068	0.0170257	0.015042	0.00602753	0.00819413	0.00975088	0.00178622	0.000985194	0.000893111	0.00155025	0.00050902	0.00240703	0.00155674	0.00185746	0.00185746	0.000178622
R_rxn01204_c0	1 GABA + 1 2-Oxoglutarate = 1 4-Oxobutanoate + 1 L-Glutamate	0	0	0	0	0	0	0	0	0	0	0	0	0	0	0	0	0	0
R_rxn00350_c0	1 GSH + 1 H2O = 1 L-Glutamate + 1 Cys-Gly	-0.00377988	-0.00341229	-0.00204517	-0.00425643	-0.00376051	-0.00150688	-0.00204853	-0.00243772	-0.000446555	-0.000246298	-0.000223278	-0.000387562	-0.000127255	-0.000601758	-0.000389184	-0.000464364	-0.000464364	-4.46555e-05
R_rxn10300_c0	1 Stearoyllipoteichoic acid (n-24), linked, unsubstituted + 24.0 UDP-glucose = 24.0 UDP + 1 Stearoyllipoteichoic acid (n-24), linked, glucose substituted	0.000859822	0.000776204	0.000465221	0.000968223	0.000855415	0.000342775	0.000465986	0.000554515	0.000101579	5.60262e-05	5.07896e-05	8.816e-05	2.89471e-05	0.000136884	8.85289e-05	0.00010563	0.00010563	1.01579e-05
R_rxn09562_c0	1 GMP + 1 dATP = 1 dADP + 1 GDP	0	0	0	0	0	0	0	0	0	0	0	0	0	0	0	0	0	0
R_rxn05612_c0	1 H+ + 1 Melibiose = 1 H+ + 1 Melibiose	0	0	0	0	0	0	0	0	0	0	0	0	0	0	0	0	0	0
R_rxn00799_c0	1 L-Malate = 1 H2O + 1 Fumarate	-0.213683	-0.192902	-0.115617	-0.240623	-0.212588	-0.0851865	-0.115807	-2.9424	-0.0252445	-0.0139236	-0.0126222	-0.0219095	-0.00719392	-0.0340183	-0.0220012	-1.26695	-1.06755	-0.00252445
R_rxn00313_c0	1 H+ + 1 meso-2,6-Diaminopimelate = 1 CO2 + 1 L-Lysine	0.154104	0.139117	0.0833805	0.173532	0.153314	0.0614348	0.0835175	0.0993845	0.0182058	0.0100414	0.0091029	0.0158007	0.00518811	0.0245333	0.0158668	0.0189319	0.0189319	0.00182058
R_rxn09197_c0	2.0 H+ + 1 phosphatidylserine didodecanoyl = 1 phosphatidylethanolamine didodecanoyl + 1 CO2	0	0	0	0	0	0	0	0	0	0	0	0	0	0	0	0	0	0
R_rxn02791_c0	1 L-3-Cyanoalanine + 1 L-Glutamate = 1 H2O + 1 gamma-Glutamyl-beta-cyanoalanine	0	0	0	0	0	0	0	0	0	0	0	0	0	0	0	0	0	0
R_rxn01972_c0	1 H2O + 1 N-acetyl-LL-2,6-diaminopimelate = 1 LL-2,6-Diaminopimelate + 1 Acetate	0.154964	0.139893	0.0838457	0.174501	0.154169	0.0617775	0.0839835	0.099939	0.0183074	0.0100975	0.00915369	0.0158889	0.00521706	0.0246702	0.0159554	0.0190375	0.0190375	0.00183074
R_rxn11268_c0	1 H+ + 1 PPi = 1 H+ + 1 PPi	0	0	0	0	0	0	0	0	0	0	0	0	0	0	0	0	0	0
R_rxn05344_c0	1 H+ + 1 Malonyl-acyl-carrierprotein- + 1 Myristoyl-ACP = 1 ACP + 1 3-oxohexadecanoyl-acp + 1 CO2	0	0	0	0	0	0	0	0	0	0	0	0	0	0	0	0	0	0
R_rxn00676_c0	1 Propionyl-CoA + 1 Acetyl-CoA = 1 2-Methylacetoacetyl-CoA + 1 CoA	0	0	0	0	0	0	0	0	0	0	0	0	0	0	0	0	0	0
R_rxn01281_c0	1 NADP + 1 Glycerate = 1 Tartronate semialdehyde + 1 H+ + 1 NADPH	0	0	0	0	0	0	0	0	0	0	0	0	0	0	0	0	0	0
R_rxn10339_c0	2.0 Diisotetradecanoylphosphatidylglycerol = 1 Isotetradecanoylcardiolipin (B. subtilis) + 1 Glycerol	0	0	0	0	0	0	0	0	0	0	0	0	0	0	0	0	0	0
R_rxn10226_c0	1 CDP-1,2-diisoheptadecanoylglycerol + 1 L-Serine = 1 H+ + 1 Diisoheptadecanoylphosphatidylserine + 1 CMP	0.00408813	0.00369056	0.00221195	0.00460354	0.00406718	0.00162977	0.00221559	0.00263651	0.000482971	0.000266384	0.000241486	0.000419168	0.000137633	0.000650831	0.000420922	0.000502232	0.000502232	4.82971e-05
R_rxn10237_c0	2.0 H+ + 1 Diisohexadecanoylphosphatidylserine = 1 Diisohexadecanoylphosphatidylethanolamine + 1 CO2	0	0	0	0	0	0	0	0	0	0	0	0	0	0	0	0	0	0
R_rxn05248_c0	1 H+ + 1 ATP + 1 fa4 + 1 CoA = 1 AMP + 1 fa4coa + 1 PPi	0	0	0	0	0	0	0	0	0	0	0	0	0	0	0	0	0	0
R_rxn10223_c0	1 1,2-diisopentadecanoyl-sn-glycerol 3-phosphate + 1 CTP = 1 PPi + 1 CDP-1,2-diisopentadecanoylglycerol	0	0	0	0	0	0	0	0	0	0	0	0	0	0	0	0	0	0
R_rxn10210_c0	1 Glycerol-3-phosphate + 1 fa6coa = 1 1-isohexadecanoyl-sn-glycerol 3-phosphate + 1 CoA	0	0	0	0	0	0	0	0	0	0	0	0	0	0	0	0	0	0
R_rxn02503_c0	1 6-hydroxymethyl dihydropterin + 1 ATP = 1 AMP + 1 2-Amino-4-hydroxy-6-hydroxymethyl-7-8-dihydropteridinediphosphate	0	0	0	0	0	0	0	0	0	0	0	0	0	0	0	0	0	0
R_rxn05349_c0	1 ACP + 1 Acetyl-CoA = 1 CoA + 1 Acetyl-ACP	0	0	0	0	0	0	0	0	0	0	0	0	0	0	0	0	0	0
R_rxn10275_c0	1 Monoglucosyl-1,2 dianteisoheptadecanoylglycerol + 1 UDP-glucose = 1 UDP + 1 Diglucosyl-1,2 dianteisoheptadecanoylglycerol	0.00343929	0.00310482	0.00186088	0.00387289	0.00342166	0.0013711	0.00186394	0.00221806	0.000406317	0.000224105	0.000203159	0.00035264	0.000115788	0.000547535	0.000354116	0.000422521	0.000422521	4.06317e-05
R_rxn08655_c0	1 Ubiquinone-8 + 1 Glycolate = 1 Ubiquinol-8 + 1 Glyoxalate	0	0	0	0	0	0	0	0	0	0	0	0	0	0	0	0	0	0
R_rxn01989_c0	1 D-Glucarate = 1 H2O + 1 5-Dehydro-4-deoxy-D-glucarate	0	0	0	0	0	0	0	0	0	0	0	0	0	0	0	0	0	0
R_rxn04794_c0	1 CoA + 1 2-Oxobutyrate = 1 Propionyl-CoA + 1 Formate	0	0	0	0	0	0	0	0	0	0	0	0	0	0	0	0	0	0
R_rxn10307_c0	1 Palmitoyllipoteichoic acid (n-24), linked, unsubstituted + 24.0 UDP-N-acetylglucosamine = 24.0 UDP + 1 Palmitoyllipoteichoic acid (n-24), linked, N-acetyl-D-glucosamine	0	0	0	0	0	0	0	0	0	0	0	0	0	0	0	0	0	0
R_rxn01334_c0	1 Sedoheptulose 1,7-bisphosphate = 1 D-Erythrose4-phosphate + 1 Glycerone-phosphate	9.55144	0	0	9.49489	9.55374	0	9.7569	0	0	0	0	0	0	0	0	0	0	0
R_rxn01028_c0	1 Dihydrothymine + 1 NADP = 1 Thymine + 1 H+ + 1 NADPH	0	0	0	0	0	0	0	0	0	0	0	0	0	0	0	0	0	0
R_rxn08087_c0	1 Hexadecenoyl-ACP + 1 1-hexadec-9-enoyl-sn-glycerol 3-phosphate = 1 ACP + 1 1,2-dihexadec-9-enoyl-sn-glycerol 3-phosphate	0	0	0	0	0	0	0	0	0	0	0	0	0	0	0	0	0	0
R_rxn03188_c0	2.0 H+ + 1 H2O + 1 3-Ureidoisobutyrate = 1 3-Aminoisobutanoate + 1 NH3 + 1 CO2	0	0	0	0	0	0	0	0	0	0	0	0	0	0	0	0	0	0
R_rxn05200_c0	1 H+ + 1 Thymidine = 1 H+ + 1 Thymidine	0	0	0	0	0	0	0	0	0	0	0	0	0	0	0	0	0	0
R_rxn00770_c0	1 ATP + 1 ribose-5-phosphate = 1 AMP + 1 PRPP	0.228579	0.206349	0.123676	0.257396	0.227407	0.0911248	0.12388	0.147415	0.0270043	0.0148942	0.0135021	0.0234368	0.00769541	0.0363897	0.0235349	0.0280812	0.0280812	0.00270043
R_rxn00192_c0	1 L-Glutamate + 1 Acetyl-CoA = 1 H+ + 1 N-Acetyl-L-glutamate + 1 CoA	0	0	0	0	0	0	0	0	0	0	0	0	0	0	0	0	0	0
R_rxn05938_c0	1 H+ + 1 CO2 + 1 Reducedferredoxin + 1 Acetyl-CoA = 1 Oxidizedferredoxin + 1 Pyruvate + 1 CoA	-14.9166	-14.7955	-0.485926	-14.2758	-14.9427	1.0457	-17.245	-16.7216	0.600549	0.331234	0.300274	0.521212	0.171138	0.809272	0.523393	0.624499	0.624499	4.06005
R_rxn00611_c0	1 Glycerol-3-phosphate + 1 NAD = 1 H+ + 1 NADH + 1 Glycerone-phosphate	-0.459873	-0.415151	-0.248822	-0.517851	-0.457516	-0.183332	-0.249231	-0.296581	-0.0543294	-0.0299655	6.86733	-0.0471521	-0.0154823	0.793553	-0.0473494	-0.056496	-0.056496	-0.00543294
R_rxn00289_c0	1 Methylisocitrate = 1 Succinate + 1 Pyruvate	0	0	0	0	0	0	0	0	0	0	0	0	0	0	0	0	0	0
R_rxn05388_c0	1 H+ + 1 5-methyl-hexanoyl-ACP + 1 Malonyl-acyl-carrierprotein- = 1 ACP + 1 CO2 + 1 7-methyl-3-oxo-octanoyl-ACP	0.0395836	0.0357341	0.0214174	0.0445741	0.0393807	0.0157803	0.0214526	0.0255282	0.00467641	0.00257928	0.0023382	0.00405862	0.00133264	0.00630171	0.00407561	0.0048629	0.0048629	0.000467641
R_rxn02085_c0	1 4-Imidazolone-5-propanoate = 1 H2O + 1 Urocanate	0	0	0	0	0	0	0	0	0	0	0	0	0	0	0	0	0	0
R_rxn05429_c0	1 H+ + 1 12-methyl-tridecanoyl-ACP + 1 Malonyl-acyl-carrierprotein- = 1 ACP + 1 CO2 + 1 14-methyl-3-oxo-pentadecanoyl-ACP	0	0	0	0	0	0	0	0	0	0	0	0	0	0	0	0	0	0
R_rxn01739_c0	1 ATP + 1 Shikimate = 1 3-phosphoshikimate + 1 ADP	0.185366	0.167339	0.100295	0.208736	0.184416	0.0738978	0.10046	0.119546	0.0218991	0.0120785	0.0109496	0.0190061	0.0062406	0.0295103	0.0190857	0.0227725	0.0227725	0.00218991
R_rxn00543_c0	1 Ethanol + 1 NAD = 1 H+ + 1 NADH + 1 Acetaldehyde	0	-13.3693	0	-11.7289	-1.7426	0	0	0	-3.95277	0	-4.47638	0	0	-3.5888	-0.0732408	-3.911	-3.911	-0.895277
R_rxn00347_c0	1 L-Aspartate = 1 NH3 + 1 Fumarate	0	0	0	0	0	0	0	2.80459	0	0	0	0	0	0	0	1.2407	1.0413	0
R_rxn10052_c0	1 H+ + 1 AMP + 1 Triphosphate = 1 PPi + 1 ADP	0.00377988	0.00341229	0.00204517	0.00425643	0.00376051	0.00150688	0.00204853	0.00243772	0.000446555	0.000246298	0.000223278	0.000387562	0.000127255	0.000601758	0.000389184	0.000464364	0.000464364	4.46555e-05
R_rxn05206_c0	1 K+ = 1 K+	0.00377988	0.00341229	0.00204517	0.00425643	0.00376051	0.00150688	0.00204853	0.00243772	0.000446555	0.000246298	0.000223278	0.000387562	0.000127255	0.000601758	0.000389184	0.000464364	0.000464364	4.46555e-05
R_rxn05552_c0	1 ATP + 1 H2O + 1 ethanesulfonate = 1 H+ + 1 Phosphate + 1 ADP + 1 ethanesulfonate	0	0	0	0	0	0	0	0	0	0	0	0	0	0	0	0	0	0
R_rxn05235_c0	1 trdrd + 1 CTP = 1 trdox + 1 H2O + 1 dCTP	0.00639689	0.0057748	0.00346115	0.00720338	0.00636411	0.00255018	0.00346684	0.00412548	0.000755728	0.000416824	0.000377864	0.000655892	0.00021536	0.00101839	0.000658637	0.000785867	0.000785867	7.55728e-05
R_rxn01521_c0	1 H2O + 1 dUMP = 1 Deoxyuridine + 1 H+ + 1 Phosphate	0.00755977	0.00682458	0.00409034	0.00851286	0.00752102	0.00301377	0.00409706	0.00487544	0.000893111	0.000492597	0.000446555	0.000775125	0.00025451	0.00120352	0.000778369	0.000928728	0.000928728	8.93111e-05
R_rxn00097_c0	1 AMP + 1 ATP = 2.0 ADP	0.729433	0.658496	0.394672	0.821396	0.725695	0.290795	0.395321	0.470426	0.308432	0.170116	0.154216	0.0747909	0.087894	0.415629	0.268806	0.320732	0.320732	0.0308432
R_rxn06591_c0	1 H+ + 1 L-Glutamyl-tRNA-Glu + 1 NADPH = 1 NADP + 1 tRNA-Glu + 1 L-Glutamate1-semialdehyde	0.0302391	0.0272983	0.0163614	0.0340514	0.0300841	0.0120551	0.0163883	0.0195018	0.00357244	0.00197039	0.00178622	0.0031005	0.00101804	0.00481406	0.00311347	0.00371491	0.00371491	0.000357244
R_rxn00126_c0	1 L-Methionine + 1 ATP + 1 H2O = 1 Phosphate + 1 S-Adenosyl-L-methionine + 1 PPi	0.0151195	0.0136492	0.00818068	0.0170257	0.015042	0.00602753	0.00819413	0.00975088	0.00178622	0.000985194	0.000893111	0.00155025	0.00050902	0.00240703	0.00155674	0.00185746	0.00185746	0.000178622
R_rxn00414_c0	2.0 ATP + 1 H2O + 1 L-Glutamine + 1 H2CO3 = 1 H+ + 1 Phosphate + 1 Carbamoylphosphate + 1 L-Glutamate + 2.0 ADP	0	0	0	0	0	0	0	0	0	0	0	0	0	0	0	0	0	0
R_rxn05547_c0	1 ATP + 1 H2O + 1 Gly-Gln = 1 H+ + 1 Phosphate + 1 ADP + 1 Gly-Gln	0	0	0	0	0	0	0	0	0	0	0	0	0	0	0	0	0	0
R_rxn06937_c0	1 H+ + 1 ATP + 1 tRNA-Glu + 1 L-Glutamate = 1 AMP + 1 L-Glutamyl-tRNA-Glu + 1 PPi	0.0302391	0.0272983	0.0163614	0.0340514	0.0300841	0.0120551	0.0163883	0.0195018	0.00357244	0.00197039	0.00178622	0.0031005	0.00101804	0.00481406	0.00311347	0.00371491	0.00371491	0.000357244
R_rxn00980_c0	1 H2O + 1 2-Phosphoglycolate = 1 H+ + 1 Phosphate + 1 Glycolate	0	0	0	0	0	0	0	0	0	0	0	0	0	0	0	0	0	0
R_rxn05244_c0	1 H+ + 1 L-Isoleucine = 1 H+ + 1 L-Isoleucine	0	0	0	0	0	0	0	0	0	0	0	0	0	0	0	0	0	0
R_rxn10285_c0	1 UDP-glucose + 1 1,2-Diisotetradecanoyl-sn-glycerol = 1 Monoglucosyl-1,2 diisotetradecanoylglycerol + 1 UDP	0	0	0	0	0	0	0	0	0	0	0	0	0	0	0	0	0	0
R_rxn10312_c0	1 Isotetradecanoyllipoteichoic acid (n-24), linked, unsubstituted + 24.0 UDP-N-acetylglucosamine = 24.0 UDP + 1 Isotetradecanoyllipoteichoic acid (n-24), linked, N-acetyl-D-glucosamine	0	0	0	0	0	0	0	0	0	0	0	0	0	0	0	0	0	0
R_rxn00159_c0	1 L-Malate + 1 NAD = 1 Pyruvate + 1 CO2 + 1 NADH	0	0	0	0	0	0	0	0	0	0	0	0	0	0	0	0	0	0
R_rxn05546_c0	1 gly-asn-L + 1 ATP + 1 H2O = 1 H+ + 1 gly-asn-L + 1 Phosphate + 1 ADP	0	0	0	0	0	0	0	0	0	0	0	0	0	0	0	0	0	0
R_rxn02508_c0	1 N-5-phosphoribosyl-anthranilate = 1 1-(2-carboxyphenylamino)-1-deoxyribulose 5-phosphate	0.025944	0.023421	0.0140375	0.0292149	0.0258111	0.0103428	0.0140605	0.0167318	0.00306503	0.00169052	0.00153251	0.00266012	0.000873442	0.00413029	0.00267125	0.00318726	0.00318726	0.000306503
R_rxn02190_c0	1 Dihydrothymine + 1 H2O = 1 H+ + 1 3-Ureidoisobutyrate	0	0	0	0	0	0	0	0	0	0	0	0	0	0	0	0	0	0
R_rxn00127_c0	1 H+ + 1 S-Adenosyl-L-methionine = 1 CO2 + 1 S-Adenosylmethioninamine	0.00377988	0.00341229	0.00204517	0.00425643	0.00376051	0.00150688	0.00204853	0.00243772	0.000446555	0.000246298	0.000223278	0.000387562	0.000127255	0.000601758	0.000389184	0.000464364	0.000464364	4.46555e-05
R_rxn00394_c0	1 H2O + 1 L-Arginine = 1 Urea + 1 Ornithine	0	0	0	0	0	0	0	0	0	0	0	0	0	0	0	0	0	0
R_rxn05251_c0	1 H+ + 1 ATP + 1 fa12 + 1 CoA = 1 fa12coa + 1 AMP + 1 PPi	0	0	0	0	0	0	0	0	0	0	0	0	0	0	0	0	0	0
R_rxn05516_c0	1 ATP + 1 H2O + 1 Cd2+ = 1 H+ + 1 Phosphate + 1 Cd2+ + 1 ADP	0	0	0	0	0	0	0	0	0	0	0	0	0	0	0	0	0	0
[truncated: 400 more rows]

## Sheet: Table S8 data for Figure1
Acetyl-CoA (Wood-Ljungdahl) pathway – Reductive branch		gene	Fructose (FPKM)	BOF Gas (FPKM)
[truncated: 116 more rows]

[truncated: 1 more sheets: Table S9 metabolomics]
